# Supplementary material for: Insertions in SARS-CoV-2 genome caused by template switch and duplications give rise to new variants of potential concern
Source: Research Square preprint supplement (doi:10.21203/rs.3.rs-456574/v1), 2021-05-05
Supplement: Supplementary file 1 [file 3570c28ceb12d720fe4c70fb.xlsx]

## Sheet: Supplementary Table 2
Position	Length	Insertion	Times	Gene	Monophyly test	Test comment
13895	3	tga	2	ORF1ab	No
27247	3	taa	2	ORF6	No
22003	3	aac	2	S	Yes	Same lab and date
23933	3	cac	2	S	Yes	Same lab and date
28254	3	tcc	2	ORF8	No
29764	3	tgt	2		Yes	Same lab and date
626	3	ttc	3	ORF1ab	No
21761	3	gtt	3	S	Yes	Same lab and date
22353	3	tta	3	S	No
1813	3	aaa	4	ORF1ab	No
25691	3	cct	4	ORF3a	No
26492	3	tta	4		No
25472	3	ttt	4	ORF3a	No
27791	3	ttt	4	ORF7b	Yes	Same lab
22320	3	ttc	5	S	No
21572	3	ttt	5	S	No
25691	3	tga	5	ORF3a	No
27249	3	att	6	ORF6	Yes	Same lab
29451	3	tct	7	N	No
23122	3	cct	8	S	No
3073	3	gaa	9	ORF1ab	No
11427	3	tta	9	ORF1ab	Yes
25882	3	ctt	14	ORF3a	No
21569	3	ttt	18	S	No
25699	3	ccc	26	ORF3a	No
28254	3	tca	26	ORF8	Yes	Same lab and date
23120	3	cac	27	S	No
25757	3	aat	47	ORF3a	No
11074	3	ttc	70	ORF1ab	No
25703	3	ccc	154	ORF3a	No
11074	3	ttt	239	ORF1ab	No
7084	6	aatggg	2	ORF1ab	Yes	Same lab and date
21819	6	taatga	2	S	Yes	Same lab and date
23583	6	tcagac	2	S	Yes	2 sequences. Exported from Nepal. Same lab and date
21770	6	tacatg	3	S	No
21819	6	accatt	4	S	No	Same lab
23120	6	cagcac	17	S	No
7125	9	taccagtta	2	ORF1ab	Yes
22204	9	aaaagaatt	2	S	Yes	Same lab and date
22204	9	acagatcga	27	S	Yes
22204	9	gcggcaggc	18	S	Yes
27622	9	aacacgtct	2	ORF7a	Yes
27756	9	aaaactttt	7	ORF7a	Yes
28272	9	tttctttgg	2		Yes
29728	9	gttgttgga	9		Yes
29749	9	ataacactt	4		No
6403	12	atagcttggaat	2	ORF1ab	Yes
21608	12	caactttgagga	2	S	Yes	Same lab and date
27295	12	taacctagttgc	2	ORF6	Yes	Same lab
28862	12	cagatcagatcg	2	N	No
3177	15	agaaaaccctcacct	8	ORF1ab	Yes
9622	21	ctcctgtccttcactccccaa	13	ORF1ab	No
7626	24	ttgtgatacattctgtgctggtag	2	ORF1ab	No
25472	24	ttttgttcgcgctactccttcaga	2	ORF3a	Yes	Same lab and date
21551	27	actttcgatctcttgtagatctgttct	4	ORF1ab	No
