# Supplementary material for: Insertions in SARS-CoV-2 genome caused by template switch and duplications give rise to new variants of potential concern
Source: Research Square preprint supplement (doi:10.21203/rs.3.rs-456574/v1), 2021-05-05
Supplement: Supplementary file 3 [file 98f9e42f1625883cb060edcd.xlsx]

## Sheet: Supplementary_Table_5_Acknowled
We gratefully acknowledge the following Authors from the Originating laboratories responsible for obtaining the specimens and the
Submitting laboratories where genetic sequence data were generated and shared via the GISAID Initiative, on which this research is based.
All submitters of data may be contacted directly via www.gisaid.org
Accession No.	Originating Laboratory	Submitting Laboratory	Authors
EPI_ISL_649150,EPI_ISL_649149,EPI_ISL_649151	Microbiological Diagnostic Unit - Public Health Laboratory (MDU-PHL), The Peter Doherty Institute for Infection and Immunity	Microbiological Diagnostic Unit - Public Health Laboratory (MDU-PHL), The Peter Doherty Institute for Infection and Immunity	Seemann et al
EPI_ISL_434616,EPI_ISL_434625,EPI_ISL_434626,EPI_ISL_434627,EPI_ISL_434628,EPI_ISL_434629,EPI_ISL_434630,EPI_ISL_434631,EPI_ISL_434632,EPI_ISL_434633,EPI_ISL_434634,EPI_ISL_434617,EPI_ISL_434635,EPI_ISL_482879,EPI_ISL_482880,EPI_ISL_482881,EPI_ISL_482882,EPI_ISL_482883,EPI_ISL_482884,EPI_ISL_482885,EPI_ISL_482886,EPI_ISL_482887,EPI_ISL_434618,EPI_ISL_482888,EPI_ISL_482889,EPI_ISL_434619,EPI_ISL_4…	CHU Purpan - Laboratoire de Virologie - Institut Fédératif de Biologie	Laboratoire de virologie - École Nationale Vétérinaire de Toulouse	Guillaume Croville et al
EPI_ISL_443258,EPI_ISL_443259	Résidence Ornano	National Reference Center for Viruses of Respiratory Infections, Institut Pasteur, Paris	Mélanie Albert et al
EPI_ISL_475232,EPI_ISL_475190,EPI_ISL_732820,EPI_ISL_732821,EPI_ISL_732822,EPI_ISL_732823,EPI_ISL_732824,EPI_ISL_732825,EPI_ISL_732826,EPI_ISL_466664,EPI_ISL_475174,EPI_ISL_475175,EPI_ISL_466652,EPI_ISL_466653,EPI_ISL_475176,EPI_ISL_475177,EPI_ISL_475178,EPI_ISL_475179,EPI_ISL_475180,EPI_ISL_475181,EPI_ISL_475182,EPI_ISL_475183,EPI_ISL_475184,EPI_ISL_475185,EPI_ISL_475186,EPI_ISL_475187,EPI_ISL_4…	Nebraska Public Health Laboratory	UNMC COVID-19 Response Team	UNMC COVID-19 Response Team et al
EPI_ISL_833432	Torrance Memorial Medical Center Microbiology	Los Angeles County PHL	P. Hemarajata et al. et al
EPI_ISL_856869,EPI_ISL_856870,EPI_ISL_856872,EPI_ISL_856873,EPI_ISL_856874,EPI_ISL_856875,EPI_ISL_856876,EPI_ISL_856877,EPI_ISL_856878,EPI_ISL_856879,EPI_ISL_856882,EPI_ISL_856883,EPI_ISL_856885	Virology Laboratory, Scientific Department, Army Medical Center	Virology Laboratory, Scientific Department, Army Medical Center	Silvia Fillo et al
EPI_ISL_660068	Instituto de Diagnostico y Referencia Epidemiologicos (INDRE)	Instituto de diagnóstico y Referencia Epidemiologicos (INDRE) Departamento de Virología	Gisela Barrera-Badillo et al
EPI_ISL_443304	Résidence Esterel	National Reference Center for Viruses of Respiratory Infections, Institut Pasteur, Paris	Mélanie Albert et al
EPI_ISL_918378,EPI_ISL_918379,EPI_ISL_918380,EPI_ISL_918377,EPI_ISL_918381,EPI_ISL_918382,EPI_ISL_918383,EPI_ISL_918384,EPI_ISL_918385,EPI_ISL_918386,EPI_ISL_918387,EPI_ISL_918388,EPI_ISL_918389,EPI_ISL_918390,EPI_ISL_918391,EPI_ISL_918392,EPI_ISL_918393,EPI_ISL_918394,EPI_ISL_918395,EPI_ISL_918396,EPI_ISL_918397,EPI_ISL_918398,EPI_ISL_918399,EPI_ISL_918400,EPI_ISL_918401,EPI_ISL_918402,EPI_ISL_9…	Ibaraki Prefectural Institute of Public Health	Ibaraki Prefectural Institute of Public Health	Keiko Goto et al
EPI_ISL_634828,EPI_ISL_700359	Laboratoire de virologie, CHU de Grenoble - CS 10217 - 38043 Grenoble cedex 20	CNR Virus des Infections Respiratoires - France SUD	Antonin Bal et al
EPI_ISL_445064,EPI_ISL_421763,EPI_ISL_428949,EPI_ISL_428955,EPI_ISL_428942,EPI_ISL_429719,EPI_ISL_434495,EPI_ISL_429760,EPI_ISL_421743,EPI_ISL_434496,EPI_ISL_434503,EPI_ISL_434501,EPI_ISL_434499,EPI_ISL_429729,EPI_ISL_428952,EPI_ISL_428948,EPI_ISL_429763,EPI_ISL_459893,EPI_ISL_429781,EPI_ISL_445054,EPI_ISL_429761,EPI_ISL_429725,EPI_ISL_429766,EPI_ISL_421754,EPI_ISL_421746,EPI_ISL_445070,EPI_ISL_4…	Laboratoire National de Sante, Microbiology, Virology	Laboratoire National de Sante, Microbiology, Epidemiology and Microbial Genomics	Anke Wienecke-Baldacchino et al
EPI_ISL_884617,EPI_ISL_884667,EPI_ISL_884664,EPI_ISL_884738,EPI_ISL_884824,EPI_ISL_884825,EPI_ISL_884611,EPI_ISL_884694,EPI_ISL_884750,EPI_ISL_884586,EPI_ISL_884584,EPI_ISL_884582,EPI_ISL_884650,EPI_ISL_884648,EPI_ISL_884704,EPI_ISL_884647,EPI_ISL_884695,EPI_ISL_884646,EPI_ISL_884690,EPI_ISL_884645,EPI_ISL_884644,EPI_ISL_884823,EPI_ISL_884643,EPI_ISL_884665,EPI_ISL_884642,EPI_ISL_884746,EPI_ISL_8…	Respiratory Viruses Branch, Centers for Disease Control and Prevention	Respiratory Viruses Branch, Centers for Disease Control and Prevention	Cook et al
EPI_ISL_593650,EPI_ISL_593651,EPI_ISL_740881,EPI_ISL_740882,EPI_ISL_779398,EPI_ISL_792026,EPI_ISL_792034,EPI_ISL_498773,EPI_ISL_526153,EPI_ISL_526213,EPI_ISL_526214,EPI_ISL_545027	Douglass Hanly Moir Pathology	NSW Health Pathology - Institute of Clinical Pathology and Medical Research; Westmead Hospital; University of Sydney	CIDM-PH et al. et al
EPI_ISL_632976,EPI_ISL_632977,EPI_ISL_632978,EPI_ISL_632979	Empire City Laboratories	New York City Public Health Laboratory	Jade Wang et al
EPI_ISL_495063	GMERS Medical College & Hospital, Himmatnagar	Gujarat Biotechnology Research Centre	Labdhi Pandya et al
EPI_ISL_418270	KU Leuven, Clinical and Epidemiological Virology	KU Leuven, Clinical and Epidemiological Virology	Tony Wawina et al
EPI_ISL_738312,EPI_ISL_738311,EPI_ISL_738310,EPI_ISL_738309,EPI_ISL_738307,EPI_ISL_738305,EPI_ISL_738303,EPI_ISL_738302,EPI_ISL_738300,EPI_ISL_738298,EPI_ISL_738288,EPI_ISL_738287,EPI_ISL_738283,EPI_ISL_738268,EPI_ISL_738267,EPI_ISL_738265,EPI_ISL_738264,EPI_ISL_738263,EPI_ISL_738262,EPI_ISL_738261,EPI_ISL_738260,EPI_ISL_738259,EPI_ISL_738258,EPI_ISL_738257,EPI_ISL_738256,EPI_ISL_738255,EPI_ISL_7…	Connecticut Veterans' Affairs Hospital	Grubaugh Lab - Yale School of Public Health	Joseph Fauver et al
EPI_ISL_745112	Dr Van Niekerk Hospital	National Health Laboratory Service (NHLS), Tygerberg	Susan Engelbrecht et al
EPI_ISL_534311	UPA III 26 de Agosto	Instituto Adolfo Lutz, Interdiciplinary Procedures Center, Strategic Laboratory	Claudio Tavares Sacchi et al
EPI_ISL_576113,EPI_ISL_576116,EPI_ISL_576114,EPI_ISL_576128,EPI_ISL_576130	RSUP Dr. Sardjito	Genetics Working Group (Pokja Genetik) Faculty of Medicine, Public Health and Nursing Universitas Gadjah Mada (FK-KMK UGM); Disease Investigation Center Wates Ministry of Agriculture Indonesia; Department of Microbiology FK-KMK UGM; Laboratorium Diagnostik Yayasan Tahija World Mosquito Program (WMP) Yogyakarta Center for Tropical Medicine FK-KMK UGM; Integrated Research Center FK-KMK UGM; Departm…	Gunadi et al
EPI_ISL_450813	Bla Kustens halsocentral	The Public Health Agency of Sweden	Olof Norrby et al
EPI_ISL_882935	Sant’Eugenio/CTO ASL Roma 2	INMI Lazzaro Spallanzani IRCCS	F Messina et al
EPI_ISL_483854,EPI_ISL_483872	Department of Microbiology, Government Medical College, Surat	Gujarat Biotechnology Research Centre	Komal Patel et al
EPI_ISL_514432	Prof. Massimo Zollo CEINGE TASK-FORCE COVID19 - Regione Campania	Prof. Massimo Zollo CEINGE TASK-FORCE COVID19 - Regione Campania	Veronica Ferrucci et al
EPI_ISL_482109,EPI_ISL_482095,EPI_ISL_482079,EPI_ISL_482094,EPI_ISL_482092,EPI_ISL_482088,EPI_ISL_482085,EPI_ISL_482081,EPI_ISL_482117,EPI_ISL_482069,EPI_ISL_482078,EPI_ISL_482111,EPI_ISL_482104,EPI_ISL_482108,EPI_ISL_482113,EPI_ISL_482073,EPI_ISL_482112,EPI_ISL_482089,EPI_ISL_482084,EPI_ISL_482100,EPI_ISL_482076,EPI_ISL_482114,EPI_ISL_482103,EPI_ISL_482090,EPI_ISL_482074,EPI_ISL_482072,EPI_ISL_4…	Microbiology Department, Hereford County Hospital	Wellcome Sanger Institute for the COVID-19 Genomics UK (COG-UK) consortium	Alison Johnson et al
EPI_ISL_833509	RS Melania, Bogor, Indonesia	Biosafety Level-3 Laboratory, Indonesian Institute of Sciences (LIPI)	Syam Budi Iryanto et al
EPI_ISL_959591,EPI_ISL_959592,EPI_ISL_959593,EPI_ISL_959598,EPI_ISL_959590,EPI_ISL_959594,EPI_ISL_959595,EPI_ISL_959596,EPI_ISL_959597,EPI_ISL_959567,EPI_ISL_959564,EPI_ISL_959565,EPI_ISL_959568,EPI_ISL_959562,EPI_ISL_959560,EPI_ISL_959559,EPI_ISL_959554,EPI_ISL_959589	Vivalia - Clinique Saint-Joseph	GIGA Medical Genomics	Keith Durkin et al
EPI_ISL_429990	Rady's Childrens Hospital	Andersen lab at Scripps Research	SEARCH Alliance San Diego with Christina Clarke et al
EPI_ISL_480322,EPI_ISL_480323,EPI_ISL_480325,EPI_ISL_480326,EPI_ISL_480327	Hospital Nacional de Niños	Charité Virology-University of Costa Rica	Andres Moreira-Soto et al
EPI_ISL_528686,EPI_ISL_528687,EPI_ISL_528688,EPI_ISL_528689,EPI_ISL_528690,EPI_ISL_528691,EPI_ISL_528692,EPI_ISL_528693,EPI_ISL_528694,EPI_ISL_528695,EPI_ISL_528696,EPI_ISL_528697,EPI_ISL_528698,EPI_ISL_528699,EPI_ISL_528700,EPI_ISL_528701,EPI_ISL_528702,EPI_ISL_528703,EPI_ISL_528704,EPI_ISL_528705,EPI_ISL_528706,EPI_ISL_528707,EPI_ISL_528708,EPI_ISL_528709,EPI_ISL_528710,EPI_ISL_528711,EPI_ISL_5…	Alsafar - Khalifa University Abu Dhabi	Alsafar - Khalifa University Abu Dhabi	Andreas Henschel et al
EPI_ISL_451963,EPI_ISL_451964,EPI_ISL_451965,EPI_ISL_451966,EPI_ISL_451967,EPI_ISL_451968,EPI_ISL_451969,EPI_ISL_451970	Federal Budget Institution of Science, State Research Center for Applied Microbiology & Biotechnology	Federal Budget Institution of Science, State Research Center for Applied Microbiology & Biotechnology	Dyatlov I et al
EPI_ISL_913450,EPI_ISL_913337,EPI_ISL_913338,EPI_ISL_913266,EPI_ISL_913455	Unilabs AB Skovde	The Public Health Agency of Sweden	Anna-Malin Linde et al
EPI_ISL_644221,EPI_ISL_644269,EPI_ISL_644231,EPI_ISL_644272,EPI_ISL_644315,EPI_ISL_644317,EPI_ISL_644338,EPI_ISL_644321,EPI_ISL_644265,EPI_ISL_644319,EPI_ISL_644268,EPI_ISL_644340,EPI_ISL_644267,EPI_ISL_644326,EPI_ISL_644217,EPI_ISL_644223,EPI_ISL_644285,EPI_ISL_644274,EPI_ISL_644335,EPI_ISL_644238,EPI_ISL_644260,EPI_ISL_644316,EPI_ISL_644276,EPI_ISL_644257,EPI_ISL_644296,EPI_ISL_644328,EPI_ISL_6…	CEPHR / Vincent's Hospital	Irish Coronavirus Sequencing Consortium - National Virus Reference Laboratory	Michael Carr et al
EPI_ISL_792291,EPI_ISL_792292,EPI_ISL_792293,EPI_ISL_792294,EPI_ISL_792295,EPI_ISL_792296,EPI_ISL_792297,EPI_ISL_792298	Laboratorio de genética y biología molecular del Hospital de trauma y emergencia Dr Federico Abete	Área de Secuenciación del Laboratorio de Virología del Hospital de Niños Dr. Ricardo Gutierrez on behalf of 'Proyecto Argentino Interinstitucional de genomica de SARS-CoV-2' (PAIS Consortium)	Nabaes Jodar et al
EPI_ISL_794654	Fundación Valle del Lili	Instituto Nacional de Salud - Dirección de Investigación en Salud Pública	Katherine Laiton-Donato et al
EPI_ISL_900528,EPI_ISL_645188,EPI_ISL_660353,EPI_ISL_645189,EPI_ISL_660354,EPI_ISL_660355,EPI_ISL_645190,EPI_ISL_660356,EPI_ISL_660357,EPI_ISL_660358,EPI_ISL_645191,EPI_ISL_645192,EPI_ISL_660359,EPI_ISL_645193,EPI_ISL_660360,EPI_ISL_645194,EPI_ISL_645195,EPI_ISL_645196,EPI_ISL_660361,EPI_ISL_641546,EPI_ISL_660362,EPI_ISL_660363,EPI_ISL_641547,EPI_ISL_660364,EPI_ISL_641548,EPI_ISL_641549,EPI_ISL_6…	CHU Clermont-Ferrand	CNR Virus des Infections Respiratoires - France SUD	Antonin Bal et al
EPI_ISL_443310	Centre de santé Filieris	National Reference Center for Viruses of Respiratory Infections, Institut Pasteur, Paris	Mélanie Albert et al
EPI_ISL_889017	RS Hermina Tangerang	Eijkman Institute for Molecular Biology, Ministry of Research and Technology/National Agency for Research and Innovation	Lydia V. Panggalo et al
EPI_ISL_483917,EPI_ISL_483918,EPI_ISL_483919,EPI_ISL_483920,EPI_ISL_483921,EPI_ISL_483922,EPI_ISL_483923,EPI_ISL_483924,EPI_ISL_483925,EPI_ISL_483926,EPI_ISL_483927,EPI_ISL_483928,EPI_ISL_483929,EPI_ISL_483930,EPI_ISL_483931,EPI_ISL_483932,EPI_ISL_483933,EPI_ISL_483934,EPI_ISL_483935,EPI_ISL_483936,EPI_ISL_483937,EPI_ISL_483938,EPI_ISL_483939,EPI_ISL_483940,EPI_ISL_483941,EPI_ISL_483942,EPI_ISL_4…	Centre for Clinical Infection and Diagnostics Research and Genomics Innovation Unit, Guy's and St. Thomas' NHS Trust	COVID-19 Genomics UK (COG-UK) Consortium	Chloe Fisher et al
EPI_ISL_960133,EPI_ISL_960135,EPI_ISL_960132,EPI_ISL_960142,EPI_ISL_960143,EPI_ISL_960140,EPI_ISL_960136,EPI_ISL_960126,EPI_ISL_960117,EPI_ISL_960145,EPI_ISL_960107,EPI_ISL_960109,EPI_ISL_960102,EPI_ISL_960103	Groote Schuur Hospital wc GSH	National Health Laboratory Service/UCT	Arash Iranzadeh et al
EPI_ISL_909684,EPI_ISL_909685	Virologie - Laboratoire de Microbiologie	National Reference Center for Viruses of Respiratory Infections, Institut Pasteur, Paris	Marion Barbet et al
EPI_ISL_467096,EPI_ISL_467095,EPI_ISL_467143,EPI_ISL_467130,EPI_ISL_467173,EPI_ISL_467108,EPI_ISL_467177,EPI_ISL_467115,EPI_ISL_467148,EPI_ISL_467137,EPI_ISL_467154,EPI_ISL_467145,EPI_ISL_467146,EPI_ISL_467179,EPI_ISL_467092,EPI_ISL_467127,EPI_ISL_467101,EPI_ISL_467117,EPI_ISL_467155,EPI_ISL_467118,EPI_ISL_467128,EPI_ISL_467163,EPI_ISL_467178,EPI_ISL_467166,EPI_ISL_467162,EPI_ISL_467157,EPI_ISL_4…	Hospital Universitario Araba. Vitoria-Gasteiz	SeqCOVID-SPAIN consortium/IBV(CSIC)	Silvia Hernáez Crespo et al
EPI_ISL_539672,EPI_ISL_539670,EPI_ISL_539641,EPI_ISL_539760,EPI_ISL_539761,EPI_ISL_539762,EPI_ISL_539671,EPI_ISL_539731,EPI_ISL_539732,EPI_ISL_539640,EPI_ISL_539730,EPI_ISL_539701,EPI_ISL_539702,EPI_ISL_539642,EPI_ISL_539700,EPI_ISL_447556,EPI_ISL_447559,EPI_ISL_447566,EPI_ISL_447848,EPI_ISL_450327,EPI_ISL_447564,EPI_ISL_447565,EPI_ISL_447575,EPI_ISL_447865,EPI_ISL_447866,EPI_ISL_458046,EPI_ISL_4…	CSIR-Centre for Cellular and Molecular Biology	CSIR-Centre for Cellular and Molecular Biology	Sofia Banu et al
EPI_ISL_984736,EPI_ISL_984980,EPI_ISL_984743,EPI_ISL_984981,EPI_ISL_984982,EPI_ISL_984744,EPI_ISL_984983,EPI_ISL_984745,EPI_ISL_984746,EPI_ISL_984984,EPI_ISL_984737,EPI_ISL_984985,EPI_ISL_984986,EPI_ISL_984987,EPI_ISL_984988,EPI_ISL_984742,EPI_ISL_984747,EPI_ISL_984989,EPI_ISL_984748,EPI_ISL_984749,EPI_ISL_984750,EPI_ISL_984738,EPI_ISL_984751,EPI_ISL_984990,EPI_ISL_984739,EPI_ISL_984740,EPI_ISL_9…	Gazi University Faculty of Medicine, Medical Virology Laboratory	Gazi University Faculty of Medicine, Medical Virology Laboratory	Erdem Şahin et al
EPI_ISL_539783,EPI_ISL_539784,EPI_ISL_697796	Universidad Regional Amazonica IKIAM	Institute of Microbiology, Universidad San Francisco de Quito	Fabian Aguilar et al
EPI_ISL_468889,EPI_ISL_452691,EPI_ISL_452690,EPI_ISL_452689,EPI_ISL_452688,EPI_ISL_452687,EPI_ISL_452686,EPI_ISL_452685,EPI_ISL_452684,EPI_ISL_452683,EPI_ISL_452682,EPI_ISL_452681,EPI_ISL_452680,EPI_ISL_452679,EPI_ISL_452678,EPI_ISL_452677,EPI_ISL_452676,EPI_ISL_452675,EPI_ISL_452674,EPI_ISL_452673,EPI_ISL_452672,EPI_ISL_452671,EPI_ISL_452670,EPI_ISL_452669,EPI_ISL_452668,EPI_ISL_452667,EPI_ISL_4…	Servicio de Microbiología. Hospital Universitario Donostia. OSI Donostialdea. Área de Enfermedades Infecciosas, Grupo de Infección Respiratoria y Resistencia Antimicrobiana. Instituto de Investigación Sanitaria Biodonostia.	SeqCOVID-SPAIN consortium/IBV(CSIC)	Gustavo Cilla et al
EPI_ISL_419554,EPI_ISL_594458	California Department of Public Health	Pathogen Discovery, Respiratory Viruses Branch, Division of Viral Diseases, Centers for Disease Control and Prevention	Ying Tao et al
EPI_ISL_977486,EPI_ISL_776764,EPI_ISL_776765,EPI_ISL_792103,EPI_ISL_776766,EPI_ISL_776769,EPI_ISL_755641,EPI_ISL_755646,EPI_ISL_755647,EPI_ISL_755649,EPI_ISL_833157,EPI_ISL_833158,EPI_ISL_833160	Instituto Adolfo Lutz - Regional de Santo Andre	Instituto Adolfo Lutz, Interdiciplinary Procedures Center, Strategic Laboratory	Claudio Tavares Sacchi et al
EPI_ISL_576174,EPI_ISL_424907	VA-Division of Consolidated Laboratory Services	Pathogen Discovery, Respiratory Viruses Branch, Division of Viral Diseases, Centers for Disease Control and Prevention	Ying Tao et al
EPI_ISL_437444	Department of MicroBiology, Government Medical College, Surat	Gujarat Biotechnology Research Centre	Dipa Kinariwala et al
EPI_ISL_615074,EPI_ISL_614892,EPI_ISL_614891,EPI_ISL_615063,EPI_ISL_614763,EPI_ISL_615066	Rwanda National Reference Laboratory	Rwanda National Reference Laboratory	Mukantwari Enatha et al
EPI_ISL_594144,EPI_ISL_594147,EPI_ISL_594143,EPI_ISL_594146,EPI_ISL_594134,EPI_ISL_594136,EPI_ISL_594137,EPI_ISL_594135,EPI_ISL_594141,EPI_ISL_594140,EPI_ISL_594138,EPI_ISL_594145	MDU-PHL, The Peter Doherty Institute for Infection and Immunity	MDU-PHL, The Peter Doherty Institute for Infection and Immunity	Caly et al
EPI_ISL_849736,EPI_ISL_849737,EPI_ISL_849738,EPI_ISL_849739,EPI_ISL_849740,EPI_ISL_849741,EPI_ISL_849742,EPI_ISL_849743	Special Operations Medical Research Division, Defence Services Medical Research Centre	Special Operations Medical Research Division, Defence Services Medical Research Centre	Oo et al
EPI_ISL_766569	Oman-National Influenza Center	Oman-National Influenza Center	Samiha Al-Kharusi et al
EPI_ISL_434571	Microbiology, The University of Hong Kong	Microbiology, The University of Hong Kong	Chan et al
EPI_ISL_586547	General Hospital,Godhra	Gujarat Biotechnology Research Centre	Pinal Gandhi et al
EPI_ISL_524727,EPI_ISL_586523,EPI_ISL_825041,EPI_ISL_514588,EPI_ISL_514606	B.J. Medical College and Civil hospital, Ahmedabad	Gujarat Biotechnology Research Centre	Nikha Trivedi et al
EPI_ISL_437446,EPI_ISL_444476	B.J. Medical College and Civil hospital	Gujarat Biotechnology Research Centre	Binita Aring et al
EPI_ISL_807151,EPI_ISL_807153,EPI_ISL_807152	Makmal Kesihatan Awam Kebangsaan, Kementerian Kesihatan Malaysia	Integrative Pharmacogenomics Institute (iPROMISE)	Mohd Zaki Salleh et al
EPI_ISL_455568,EPI_ISL_489896,EPI_ISL_489897,EPI_ISL_489898,EPI_ISL_489899,EPI_ISL_547604,EPI_ISL_547607,EPI_ISL_547627,EPI_ISL_547643,EPI_ISL_547657,EPI_ISL_547662,EPI_ISL_547665,EPI_ISL_547704,EPI_ISL_547711,EPI_ISL_547722,EPI_ISL_547724,EPI_ISL_547726,EPI_ISL_547735,EPI_ISL_547754,EPI_ISL_547758,EPI_ISL_547764,EPI_ISL_547786,EPI_ISL_547787,EPI_ISL_547788,EPI_ISL_547797,EPI_ISL_547857,EPI_ISL_6…	Gundersen Molecular Diagnostics Laboratory	Kabara Cancer Research Institute	Craig S. Richmond et al
EPI_ISL_942651,EPI_ISL_942653,EPI_ISL_942654,EPI_ISL_942655,EPI_ISL_942656,EPI_ISL_942657,EPI_ISL_942658,EPI_ISL_942659,EPI_ISL_942660,EPI_ISL_942661,EPI_ISL_942662,EPI_ISL_942663,EPI_ISL_942664,EPI_ISL_942665,EPI_ISL_942666,EPI_ISL_942667,EPI_ISL_942668,EPI_ISL_942671,EPI_ISL_942673,EPI_ISL_942674,EPI_ISL_942675,EPI_ISL_942676,EPI_ISL_942678,EPI_ISL_942679,EPI_ISL_942680,EPI_ISL_942681,EPI_ISL_9…	Gundersen Molecular Diagnostics Laboratory	Kabara Cancer Research Institute	Craig S. Richmond et al
EPI_ISL_514131,EPI_ISL_514132,EPI_ISL_514133,EPI_ISL_514134,EPI_ISL_514135,EPI_ISL_514136,EPI_ISL_514137,EPI_ISL_514138	Rondônia Central Public Health Laboratory (LACEN/RO), vinculated to State Health Secretariat of Rondônia (SESAU/RO)	Molecular Virology Laboratory of Oswaldo Cruz Foundation of Rondônia	Luan Felipo Botelho-Souza et al
EPI_ISL_434652	Ektorps Vardcentral	The Public Health Agency of Sweden	Eva Espmark et al
EPI_ISL_718204,EPI_ISL_718192,EPI_ISL_718218,EPI_ISL_718222,EPI_ISL_718197,EPI_ISL_718198,EPI_ISL_718178,EPI_ISL_718174,EPI_ISL_718182,EPI_ISL_718203,EPI_ISL_718191,EPI_ISL_718205,EPI_ISL_718167,EPI_ISL_718216,EPI_ISL_718185,EPI_ISL_718176	Borneo Medical Centre	Institute of Health and Community Medicine	David Perera et al
EPI_ISL_912557,EPI_ISL_912558	Centre Hospitalier de Gisors Route de Rouen	National Reference Center for Viruses of Respiratory Infections, Institut Pasteur, Paris	Marion Barbet et al
EPI_ISL_862544,EPI_ISL_862553,EPI_ISL_862554,EPI_ISL_862555	Compejo Hospitalario Xeral-Calde	Instituto de Salud Carlos III	Iglesias-Caballero et al
EPI_ISL_445247	UNIVERSIDAD DE LOS ANDES	Instituto de Salud Publica de Chile	Andrés E Castillo et al
EPI_ISL_451159,EPI_ISL_469035	Government Medical College, Vadodara	Gujarat Biotechnology Research Centre	Raghawendra Kumar et al
EPI_ISL_875347,EPI_ISL_875348,EPI_ISL_875561,EPI_ISL_875562,EPI_ISL_875565,EPI_ISL_875871,EPI_ISL_875872,EPI_ISL_981202,EPI_ISL_981305,EPI_ISL_981306,EPI_ISL_981368,EPI_ISL_981369,EPI_ISL_889443,EPI_ISL_889542,EPI_ISL_890174,EPI_ISL_890175,EPI_ISL_890176,EPI_ISL_890178,EPI_ISL_890180,EPI_ISL_890179,EPI_ISL_890181,EPI_ISL_890182,EPI_ISL_892248,EPI_ISL_892269,EPI_ISL_892364,EPI_ISL_892368,EPI_ISL_8…	Ohio Department of Health Laboratory	Ohio Department of Health Laboratory	Holmes et al
EPI_ISL_491155,EPI_ISL_491147,EPI_ISL_491149,EPI_ISL_491156,EPI_ISL_491150,EPI_ISL_491157,EPI_ISL_491152,EPI_ISL_491158,EPI_ISL_491148,EPI_ISL_491151,EPI_ISL_491154,EPI_ISL_491153,EPI_ISL_491146	Oman-National Influenza Center	Biotechnology & OMICs Laboratory	Abdul Latif Khan et al
EPI_ISL_978534,EPI_ISL_978535	Centre de Virologie des Maladies infectueuses Tropicales	Functional Genomic Platform UATRS-biology, CNRST	Tahar BAJJOU et al
EPI_ISL_984270,EPI_ISL_984273,EPI_ISL_984308	Institut National d'hygiène	"Unité Mixte Internationale TransVIHMI (UMI 233 IRD – U1175 INSERM - Université de Montpellier) IRD (Institut de recherche pour le développement)"	Mounerou SALOU et al
EPI_ISL_852858,EPI_ISL_852859,EPI_ISL_852860,EPI_ISL_852861,EPI_ISL_911520,EPI_ISL_911521,EPI_ISL_918495,EPI_ISL_935359,EPI_ISL_935360,EPI_ISL_935361,EPI_ISL_935362,EPI_ISL_935363,EPI_ISL_935364,EPI_ISL_935365,EPI_ISL_935366,EPI_ISL_965016,EPI_ISL_965017,EPI_ISL_965018,EPI_ISL_965019,EPI_ISL_965020,EPI_ISL_965021,EPI_ISL_965022,EPI_ISL_445006,EPI_ISL_965023,EPI_ISL_965024,EPI_ISL_445008,EPI_ISL_4…	Florida Bureau of Public Health Laboratories	Florida Bureau of Public Health Laboratories	Sarah Schmedes et al
EPI_ISL_549199,EPI_ISL_549200,EPI_ISL_549201,EPI_ISL_549202,EPI_ISL_549203,EPI_ISL_549204,EPI_ISL_549205,EPI_ISL_549206,EPI_ISL_549207,EPI_ISL_549208,EPI_ISL_549210,EPI_ISL_549211,EPI_ISL_549212,EPI_ISL_549213,EPI_ISL_549214,EPI_ISL_549215,EPI_ISL_549216,EPI_ISL_549217,EPI_ISL_549218,EPI_ISL_549219,EPI_ISL_549220,EPI_ISL_549221,EPI_ISL_549222,EPI_ISL_549223,EPI_ISL_549224,EPI_ISL_549225,EPI_ISL_5…	Florida Bureau of Public Health Laboratories	Florida Bureau of Public Health Laboratories	Sarah Schmedes et al
EPI_ISL_848784,EPI_ISL_848802,EPI_ISL_848808,EPI_ISL_848803,EPI_ISL_848809,EPI_ISL_848748,EPI_ISL_848749,EPI_ISL_848750,EPI_ISL_848751,EPI_ISL_848761,EPI_ISL_848739,EPI_ISL_848756,EPI_ISL_848752,EPI_ISL_848742,EPI_ISL_848745,EPI_ISL_848744,EPI_ISL_848753,EPI_ISL_848754,EPI_ISL_848757,EPI_ISL_848740,EPI_ISL_848705,EPI_ISL_848714,EPI_ISL_848704,EPI_ISL_848715,EPI_ISL_848706,EPI_ISL_848707,EPI_ISL_8…	Florida Bureau of Public Health Laboratories	Florida Bureau of Public Health Laboratories	Sarah Schmedes et al
EPI_ISL_801537	Sunrise Medical Labs	Pathogen Discovery, Respiratory Viruses Branch, Division of Viral Diseases, Centers for Disease Control and Prevention	Ying Tao et al
EPI_ISL_496530,EPI_ISL_728266,EPI_ISL_728267,EPI_ISL_728270,EPI_ISL_497891,EPI_ISL_728268,EPI_ISL_728264,EPI_ISL_728265,EPI_ISL_728258,EPI_ISL_728257,EPI_ISL_497890,EPI_ISL_496546,EPI_ISL_496547,EPI_ISL_496521,EPI_ISL_497889,EPI_ISL_496548,EPI_ISL_497888,EPI_ISL_496522,EPI_ISL_728271,EPI_ISL_496549,EPI_ISL_496534,EPI_ISL_496527,EPI_ISL_728327,EPI_ISL_496550,EPI_ISL_728256,EPI_ISL_728255,EPI_ISL_7…	B.J. Govt. Medical College	National Centre For Cell Science	Dhiraj Paul et al
EPI_ISL_447054	Cantacuzino National Military-Medical Institute for Research and Development	Cantacuzino Institute	M.Lazar et al
EPI_ISL_547980,EPI_ISL_547981,EPI_ISL_547982,EPI_ISL_547983,EPI_ISL_547984,EPI_ISL_547985,EPI_ISL_548116,EPI_ISL_548117,EPI_ISL_548118,EPI_ISL_579060,EPI_ISL_579061,EPI_ISL_579062,EPI_ISL_579063,EPI_ISL_579064,EPI_ISL_579065,EPI_ISL_579066,EPI_ISL_579067,EPI_ISL_579068,EPI_ISL_579069,EPI_ISL_579070,EPI_ISL_579071,EPI_ISL_579072,EPI_ISL_579073,EPI_ISL_579074,EPI_ISL_579075,EPI_ISL_579077,EPI_ISL_5…	Canterbury Health Laboratories	Institute of Environmental Science and Research (ESR)	Xiaoyun Ren et al
EPI_ISL_681888,EPI_ISL_681923,EPI_ISL_681921,EPI_ISL_681908,EPI_ISL_681885,EPI_ISL_681906,EPI_ISL_681922,EPI_ISL_681925,EPI_ISL_681919,EPI_ISL_681914,EPI_ISL_681887,EPI_ISL_681905,EPI_ISL_681899,EPI_ISL_681900,EPI_ISL_681903,EPI_ISL_681917,EPI_ISL_681928,EPI_ISL_681913,EPI_ISL_681910,EPI_ISL_763350,EPI_ISL_681893,EPI_ISL_681904,EPI_ISL_681920,EPI_ISL_681898,EPI_ISL_681912,EPI_ISL_682057,EPI_ISL_6…	National Virus Reference Laboratory	Irish Coronavirus Sequencing Consortium - Teagasc Moorepark	Paul Cotter et al
EPI_ISL_485810,EPI_ISL_485811,EPI_ISL_485812,EPI_ISL_485813	Institut für Virologie und Epidemiologie der Viruskrankheiten, Universitätsklinikum Tübingen	NGS Competence Center Tübingen, Institut für Medizinische Mikrobiologie und Hygiene, Universitätsklinikum Tübingen	Angelov et al. et al
EPI_ISL_903796,EPI_ISL_903811,EPI_ISL_903567,EPI_ISL_903835,EPI_ISL_903740,EPI_ISL_903626,EPI_ISL_903862,EPI_ISL_903907,EPI_ISL_903755,EPI_ISL_903839,EPI_ISL_903870,EPI_ISL_903614,EPI_ISL_903769,EPI_ISL_903759,EPI_ISL_903804,EPI_ISL_903622,EPI_ISL_903800	NM Dept. Health, Scientific Laboratory Division	Genomics and Discovery, Respiratory Viruses Branch, Division of Viral Diseases, Centers for Disease Control and Prevention	Krista Queen et al
EPI_ISL_427748,EPI_ISL_427698,EPI_ISL_427794,EPI_ISL_427692,EPI_ISL_427682,EPI_ISL_427771,EPI_ISL_427734,EPI_ISL_427803,EPI_ISL_427806,EPI_ISL_427695,EPI_ISL_427665,EPI_ISL_427643,EPI_ISL_427649,EPI_ISL_417387,EPI_ISL_417404,EPI_ISL_427663,EPI_ISL_427664,EPI_ISL_427646,EPI_ISL_427704,EPI_ISL_427725,EPI_ISL_427678	Centre for Infectious Diseases and Microbiology Public Health	NSW Health Pathology - Institute of Clinical Pathology and Medical Research; Westmead Hospital; University of Sydney	Timms V et al
EPI_ISL_842639,EPI_ISL_906832,EPI_ISL_860263,EPI_ISL_906821,EPI_ISL_964272,EPI_ISL_964275,EPI_ISL_964278,EPI_ISL_964281,EPI_ISL_964292,EPI_ISL_964295,EPI_ISL_417484,EPI_ISL_964998,EPI_ISL_964999,EPI_ISL_965000,EPI_ISL_417490,EPI_ISL_420135,EPI_ISL_417488,EPI_ISL_417489,EPI_ISL_964980,EPI_ISL_964960,EPI_ISL_964955,EPI_ISL_964987,EPI_ISL_420150,EPI_ISL_590916,EPI_ISL_590914,EPI_ISL_590918,EPI_ISL_4…	Oslo University Hospital, Department of Medical Microbiology	Norwegian Institute of Public Health, Department of Virology	Kathrine Stene-Johansen et al
EPI_ISL_888821	GZA Hospital Sint-Augustinus	UAntwerp, Laboratory of Medical Microbiology, Campus Drie Eiken S6.26, Universiteitsplein 1, 2610, Wilrijk, Antwerp, Belgium	Basil Britto Xavier et al
EPI_ISL_735418	Hospital Regional do Vale do Paraiba	Instituto Adolfo Lutz, Interdiciplinary Procedures Center, Strategic Laboratory	Claudio Tavares Sacchi et al
EPI_ISL_914000,EPI_ISL_914001,EPI_ISL_914002	Quest Diagnostics Tucker GA	Pathogen Discovery, Respiratory Viruses Branch, Division of Viral Diseases, Centers for Disease Control and Prevention	Ying Tao et al
EPI_ISL_856888	Department of Infectious Diseases, Istituto Superiore di Sanità, Roma, Italy; A.O.R. San Carlo di Potenza, Laboratorio Microbiologia e Virologia, Potenza, Italy	Virology Laboratory, Scientific Department, Army Medical Center	Paola Stefanelli et al
EPI_ISL_707696	Medical Research Center, Faculty of Medicine, Syarif Hidayatullah State Islamic University Jakarta	Medical Research Center, Faculty of Medicine, Syarif Hidayatullah State Islamic University Jakarta	Laifa Hendarmin et al
EPI_ISL_862852,EPI_ISL_862853,EPI_ISL_862854	Tosei General Hospital	Fujita health University, School of Medicine, Department of Microbiology	Masahiro suzuki et al
EPI_ISL_969297	Laboratorio Microbiologia e Virologia, P.O. Cotugno, A.O. dei Colli	Laboratorio Microbiologia e Virologia, P.O. Cotugno, A.O. dei Colli	Luigi Atripaldi et al
EPI_ISL_419211	Central Virology Laboratory	Israel Institute for Biological Research	Inbar Cohen-Gihon et al
EPI_ISL_934548,EPI_ISL_934549,EPI_ISL_934550,EPI_ISL_934551,EPI_ISL_934552,EPI_ISL_934553,EPI_ISL_934554,EPI_ISL_934555,EPI_ISL_934556,EPI_ISL_934557,EPI_ISL_934558,EPI_ISL_934559,EPI_ISL_934560,EPI_ISL_934561,EPI_ISL_934562,EPI_ISL_934563,EPI_ISL_934564,EPI_ISL_934565,EPI_ISL_934566,EPI_ISL_934567,EPI_ISL_934568,EPI_ISL_934569,EPI_ISL_934570,EPI_ISL_934571,EPI_ISL_934572,EPI_ISL_934573,EPI_ISL_9…	Department of Laboratory Medicine, Division of Clinical Virology, University of Medicine, Vienna	Bergthaler laboratory, CeMM Research Center for Molecular Medicine of the Austrian Academy of Sciences	Lukas Endler et al
EPI_ISL_977471,EPI_ISL_977475,EPI_ISL_977478,EPI_ISL_977480,EPI_ISL_977481,EPI_ISL_977485,EPI_ISL_977488	Instituto Adolfo Lutz - Regional de Presidente Prudente	Instituto Adolfo Lutz, Interdiciplinary Procedures Center, Strategic Laboratory	Claudio Tavares Sacchi et al
EPI_ISL_451666	M.P Shah Government Medocal college Jamnagar	Gujarat Biotechnology Research Centre	Binita Aring et al
EPI_ISL_493129,EPI_ISL_493130,EPI_ISL_492074,EPI_ISL_493426	Functional Genomics Core University of South Carolina / Prisma Health–Midlands	Functional Genomics Core, University of South Carolina,	Hao Ji et al
EPI_ISL_481483	Department for Virology, Molecular Biology and Genome Research, R. G. Lugar Center for Public Health Research, National Center for Disease Control and Public Health (NCDC) of Georgia.	Department for Virology, Molecular Biology and Genome Research, R. G. Lugar Center for Public Health Research, National Center for Disease Control and Public Health (NCDC) of Georgia.	Nino Berishvili et al
EPI_ISL_947325	RSIA PKU Muhammadiyah	Eijkman Institute for Molecular Biology, Ministry of Research and Technology/National Agency for Research and Innovation	Sukma Oktavianthi et al
EPI_ISL_547578	Hospital Doutor Domingos Leonardo Cerávolo	Instituto Adolfo Lutz, Interdiciplinary Procedures Center, Strategic Laboratory	Claudio Tavares Sacchi et al
EPI_ISL_416493	CH Jean de Navarre Laboratoire de Biologie	National Reference Center for Viruses of Respiratory Infections, Institut Pasteur, Paris	Mélnie Albert et al
EPI_ISL_480204	Akita City Public Health Center	Pathogen Genomics Center, National Institute of Infectious Diseases	Tsuyoshi Sekizuka et al
EPI_ISL_954021,EPI_ISL_883990,EPI_ISL_883991,EPI_ISL_883992,EPI_ISL_883993,EPI_ISL_883994,EPI_ISL_883995,EPI_ISL_883996,EPI_ISL_872254,EPI_ISL_884006,EPI_ISL_884007,EPI_ISL_872326,EPI_ISL_872240,EPI_ISL_872241,EPI_ISL_872221,EPI_ISL_872327,EPI_ISL_872328,EPI_ISL_872329,EPI_ISL_872330,EPI_ISL_872242,EPI_ISL_872243,EPI_ISL_872331,EPI_ISL_872222,EPI_ISL_872244,EPI_ISL_872332,EPI_ISL_872202,EPI_ISL_8…	hopital	National Reference Center for Viruses of Respiratory Infections, Institut Pasteur, Paris	Marion Barbet et al
EPI_ISL_416829,EPI_ISL_416866,EPI_ISL_416885,EPI_ISL_416886,EPI_ISL_416907	National Public Health Laboratory	Malaysia Genome Institute	Mohd Noor Mat Isa et al
EPI_ISL_450444	20 Dongda Street, Fengtai District, Beijing, Beijing 100071, China	Dept. OPA, Beijing Institute of Microbiology and Epidemiology	Zhang et al
EPI_ISL_528603,EPI_ISL_528605,EPI_ISL_528608	National Genomics Core-Center for DNA Fingerprinting and Diagnostics	National Genomics Core- Center for DNA Fingerprinting and Diagnostics (NGC-CDFD)- DBT's PAN-INDIA-1000 Genome consortium	Ashwin Dalal et al
EPI_ISL_427686,EPI_ISL_427696,EPI_ISL_427785,EPI_ISL_427673,EPI_ISL_427708,EPI_ISL_427647,EPI_ISL_427731,EPI_ISL_427687,EPI_ISL_427793,EPI_ISL_427767,EPI_ISL_427745,EPI_ISL_417386,EPI_ISL_427730,EPI_ISL_427732,EPI_ISL_417403,EPI_ISL_427645,EPI_ISL_427703,EPI_ISL_427672	Centre for Infectious Diseases and Microbiology Public Health	NSW Health Pathology - Institute of Clinical Pathology and Medical Research; Westmead Hospital; University of Sydney	Gray K et al
EPI_ISL_717694,EPI_ISL_756362,EPI_ISL_717695,EPI_ISL_717699,EPI_ISL_717697,EPI_ISL_756363,EPI_ISL_717692,EPI_ISL_717696,EPI_ISL_717700,EPI_ISL_717698	Trinidad Public Health Laboratory	Carrington Lab, Department of PreClinical Sciences, Faculty of Medical Sciences, The University of the West Indies	Nikita S. D. Sahadeo et al
EPI_ISL_902753	Azienda Ospedaliera San Camillo Forlanini	INMI Lazzaro Spallanzani IRCCS	C.E.M Gruber et al
EPI_ISL_538265,EPI_ISL_538266,EPI_ISL_538267,EPI_ISL_538268,EPI_ISL_538269,EPI_ISL_538270,EPI_ISL_538271,EPI_ISL_538272,EPI_ISL_538273,EPI_ISL_538274,EPI_ISL_560806,EPI_ISL_560807,EPI_ISL_560808,EPI_ISL_560809,EPI_ISL_560810,EPI_ISL_560811,EPI_ISL_560812,EPI_ISL_560813,EPI_ISL_560814,EPI_ISL_560815,EPI_ISL_560816,EPI_ISL_560817,EPI_ISL_560818,EPI_ISL_560819,EPI_ISL_560820,EPI_ISL_560821,EPI_ISL_5…	Maryland Public Health Laboratory	Maryland Public Health Laboratory	Maryland Department of Health Laboratories Administration et al
EPI_ISL_586562	GMERS GMERS Medical College and Hospital, Junagadh	Gujarat Biotechnology Research Centre	Nikha Trivedi et al
EPI_ISL_436288,EPI_ISL_436308,EPI_ISL_436328,EPI_ISL_436348,EPI_ISL_436399,EPI_ISL_447480,EPI_ISL_447494,EPI_ISL_447508,EPI_ISL_425201	Servicio de Microbiologia. Hospital Clinico Universitario de Valencia	Sequencing and Bioinformatics Service and Molecular Epidemiology Research Group. FISABIO-Public Health	Mariana Reyes-Prieto et al
EPI_ISL_733482,EPI_ISL_733483,EPI_ISL_733484,EPI_ISL_733485,EPI_ISL_733486,EPI_ISL_733488,EPI_ISL_733489,EPI_ISL_733490,EPI_ISL_733491,EPI_ISL_733492,EPI_ISL_733493	Omsk Research Institute of Natural Focal Infections	WHO National Influenza Centre Russian Federation	Andrey Komissarov et al
EPI_ISL_426512,EPI_ISL_426513,EPI_ISL_426514,EPI_ISL_426515,EPI_ISL_426516,EPI_ISL_426517,EPI_ISL_426518,EPI_ISL_426519,EPI_ISL_426527,EPI_ISL_426528,EPI_ISL_426529,EPI_ISL_426530,EPI_ISL_426531,EPI_ISL_694049,EPI_ISL_426537,EPI_ISL_426538,EPI_ISL_426539,EPI_ISL_426483,EPI_ISL_426540,EPI_ISL_427271,EPI_ISL_427272,EPI_ISL_426541,EPI_ISL_426485,EPI_ISL_426542,EPI_ISL_426543,EPI_ISL_426544,EPI_ISL_4…	AZ SPHL, Arizona Department of Health Services	TGen North	Jolene Bowers et al
EPI_ISL_413606,EPI_ISL_413607,EPI_ISL_413608,EPI_ISL_413609,EPI_ISL_413610,EPI_ISL_413611	unknown	Pathogen Discovery, Respiratory Viruses Branch, Division of Viral Diseases, Centers for Disease Control and Prevention	Anna Uehara et al
EPI_ISL_833114,EPI_ISL_833104,EPI_ISL_833103,EPI_ISL_833112,EPI_ISL_833111,EPI_ISL_833110,EPI_ISL_833113,EPI_ISL_833118,EPI_ISL_833117,EPI_ISL_833116,EPI_ISL_833115,EPI_ISL_833109,EPI_ISL_833108,EPI_ISL_833107,EPI_ISL_833106,EPI_ISL_833105	SIESP DIPARTIMENTO DI PREVENZIONE TERAMO C.DA CASALENA	Istituto Zooprofilattico Sperimentale dell’Abruzzo e Molise “G. Caporale”	Lorusso A et al
EPI_ISL_528746	Immanuel Hospital	Molecular Genetics Laboratory-Faculty of Medicine-Universitas Padjadjaran; School of Life Sciences and Technology & School of Pharmacy-Institut Teknologi Bandung; Laboratorium Kesehatan Provinsi Jawa Barat	Yunia Sribudiani et al
EPI_ISL_914841,EPI_ISL_914842,EPI_ISL_914843,EPI_ISL_914844,EPI_ISL_914845,EPI_ISL_914846,EPI_ISL_914847,EPI_ISL_914848,EPI_ISL_914849,EPI_ISL_914850,EPI_ISL_914851,EPI_ISL_914852,EPI_ISL_914853,EPI_ISL_914854,EPI_ISL_914855,EPI_ISL_914856,EPI_ISL_914857,EPI_ISL_914858,EPI_ISL_914859,EPI_ISL_914860,EPI_ISL_914861,EPI_ISL_914862,EPI_ISL_914863,EPI_ISL_914864,EPI_ISL_914865,EPI_ISL_528663,EPI_ISL_5…	Virginia Division of Consolidated Laboratory Services (DCLS)	Virginia Division of Consolidated Laboratory Services (DCLS)	Virginia DCLS et al
EPI_ISL_435284,EPI_ISL_435287,EPI_ISL_435289,EPI_ISL_435292,EPI_ISL_435291	Central Virology Laboratory, Israel Ministry of Health	Central Virology Laboratory, Israel Ministry of Health	Neta Zuckerman et al
EPI_ISL_430064,EPI_ISL_430065,EPI_ISL_430066	Geelong Centre for Emerging Infectious Diseases	Geelong Centre for Emerging Infectious Diseases	Chamings A. et al
EPI_ISL_452191,EPI_ISL_522856,EPI_ISL_452190,EPI_ISL_522858	ULSS9 Distretto di San Bonifacio	Istituto Zooprofilattico Sperimentale delle Venezie	Adelaide Milani et al
EPI_ISL_978495,EPI_ISL_978496,EPI_ISL_978497,EPI_ISL_978498,EPI_ISL_978499,EPI_ISL_978500,EPI_ISL_978502,EPI_ISL_978503,EPI_ISL_978504,EPI_ISL_978505,EPI_ISL_978506,EPI_ISL_978507,EPI_ISL_978508,EPI_ISL_978509,EPI_ISL_978510,EPI_ISL_978511,EPI_ISL_978512,EPI_ISL_978513,EPI_ISL_978514,EPI_ISL_978488,EPI_ISL_978515,EPI_ISL_978516,EPI_ISL_978517,EPI_ISL_978518,EPI_ISL_978519,EPI_ISL_978520,EPI_ISL_9…	Central Public Health Laboratory - LACEN -Bahia, Salvador, Brazil	Central Public Health Laboratory - LACEN -Bahia, Salvador, Brazil	Stephane Tosta et al
EPI_ISL_413583	MHC Rotterdam-Rijnmond	Erasmus Medical Center	David Nieuwenhuijse et al
EPI_ISL_837054	UBS Jose Sabino Ferreira	Instituto Adolfo Lutz, Interdiciplinary Procedures Center, Strategic Laboratory	Claudio Tavares Sacchi et al
EPI_ISL_806763,EPI_ISL_806764,EPI_ISL_806765,EPI_ISL_806758,EPI_ISL_806759,EPI_ISL_806760,EPI_ISL_806761,EPI_ISL_806781,EPI_ISL_806782,EPI_ISL_833301,EPI_ISL_833283	DIPARTIMENTO PREVENZIONE AVEZZANO-SERVIZIO DI IGIENE EPIDEMIOLOGIA E SANITA' PUBBLICA	Istituto Zooprofilattico Sperimentale dell’Abruzzo e Molise “G. Caporale”	Lorusso A et al
EPI_ISL_845882	VRDL, Mysore Medical College	Department of Neurovirology, National Institute of Mental Health and Neurosciences (NIMHANS)	Chitra Pattabiraman et al
EPI_ISL_455655,EPI_ISL_437538,EPI_ISL_430467,EPI_ISL_437539,EPI_ISL_455643,EPI_ISL_455644,EPI_ISL_455645,EPI_ISL_455646,EPI_ISL_455647,EPI_ISL_455648,EPI_ISL_455649,EPI_ISL_430468,EPI_ISL_455650,EPI_ISL_455651,EPI_ISL_455652,EPI_ISL_455653,EPI_ISL_455654,EPI_ISL_455656,EPI_ISL_455657,EPI_ISL_455658,EPI_ISL_430464,EPI_ISL_455659,EPI_ISL_455660,EPI_ISL_455661,EPI_ISL_455662,EPI_ISL_455663,EPI_ISL_5…	ICMR-National Institute of Cholera and Enteric Diseases	National Institute of Biomedical Genomics	Arindam Maitra et al
EPI_ISL_411929	Department of Clinical Diagnostics	Department of Clinical Diagnostics	Park et al
EPI_ISL_751599,EPI_ISL_751600,EPI_ISL_751672,EPI_ISL_751676,EPI_ISL_751727,EPI_ISL_751768,EPI_ISL_751626,EPI_ISL_751770,EPI_ISL_751579,EPI_ISL_751632,EPI_ISL_903883,EPI_ISL_903886,EPI_ISL_903904,EPI_ISL_903875,EPI_ISL_903616,EPI_ISL_903754,EPI_ISL_903773	IN State Department of Health Laboratory Services	Genomics and Discovery, Respiratory Viruses Branch, Division of Viral Diseases, Centers for Disease Control and Prevention	Krista Queen et al
EPI_ISL_593903	Hospital, Argenteuil	National Reference Center for Viruses of Respiratory Infections, Institut Pasteur, Paris	Sylvie Behillil et al
EPI_ISL_947328	RS Mitra Keluarga Depok	Eijkman Institute for Molecular Biology, Ministry of Research and Technology/National Agency for Research and Innovation	Willy Agustine et al
EPI_ISL_576178	DC Public Health Lab/ Dept. of Forensic Sciences	Pathogen Discovery, Respiratory Viruses Branch, Division of Viral Diseases, Centers for Disease Control and Prevention	Ying Tao et al
EPI_ISL_833087	Servizio di Igiene Epidemiologia e Sanità Pubblica (SIESP) L'AQUILA	Istituto Zooprofilattico Sperimentale dell’Abruzzo e Molise “G. Caporale”	Lorusso A et al
EPI_ISL_414476,EPI_ISL_415151	MSHS Clinical Microbiology Laboratories	MSHS Pathogen Surveillance Program	Gopi Patel et al
EPI_ISL_528750	Santo Borromeus Hospital	School of Life Sciences and Technology & School of Pharmacy-Institut Teknologi Bandung; Molecular Genetics Laboratory-Faculty of Medicine-Universitas Padjadjaran; Laboratorium Kesehatan Provinsi Jawa Barat	Marselina Irasonia Tan et al
EPI_ISL_977604,EPI_ISL_977605,EPI_ISL_977606,EPI_ISL_977607,EPI_ISL_977608,EPI_ISL_977609,EPI_ISL_977610,EPI_ISL_977611,EPI_ISL_977612,EPI_ISL_977613,EPI_ISL_977614,EPI_ISL_977615,EPI_ISL_977616,EPI_ISL_977617,EPI_ISL_977618,EPI_ISL_977619,EPI_ISL_977620,EPI_ISL_833455,EPI_ISL_833454,EPI_ISL_833453,EPI_ISL_833452,EPI_ISL_833451,EPI_ISL_833450,EPI_ISL_833449,EPI_ISL_833448,EPI_ISL_833447,EPI_ISL_8…	SC (UCO) Igiene e Sanità Pubblica (funzione integrata con SC Microbiologia e Virologia) e Laboratory of Molecular Virology of the International Centre for Genetic Engineering and Biotechnology (ICGEB)	ARGO Laboratorio Genomica ed Epigenomica	Licastro D et al
EPI_ISL_536656,EPI_ISL_536657,EPI_ISL_536785,EPI_ISL_541551,EPI_ISL_541552,EPI_ISL_541553,EPI_ISL_541554,EPI_ISL_541555,EPI_ISL_541556,EPI_ISL_541557,EPI_ISL_541558,EPI_ISL_541559,EPI_ISL_541560,EPI_ISL_541561,EPI_ISL_541562,EPI_ISL_541563,EPI_ISL_541564,EPI_ISL_541565	University of Wisconsin-Madison Campus AIDS Vaccine Research Laboratories	University of Wisconsin-Madison AIDS Vaccine Research Laboratories	Gage Moreno et al
EPI_ISL_766587,EPI_ISL_812257	Analytica Medizinische Laboratorien AG	Institute of Medical Virology, University of Zurich	Stefan Schmutz et al
EPI_ISL_769999	Area De Salud Paraiso-Cervantes	Inciensa, Instituto Costarricense de Investigación y Enseñanza en Nutrición y Salud	Francisco Duarte et al
EPI_ISL_792375,EPI_ISL_792376,EPI_ISL_792377,EPI_ISL_792378,EPI_ISL_792379,EPI_ISL_792380,EPI_ISL_792381,EPI_ISL_792382,EPI_ISL_792383,EPI_ISL_792384,EPI_ISL_792385	Laboratorio de salud pública, Facultad de Ciencias Exactas, Universidad Nacional de La Plata	Área de Secuenciación del Laboratorio de Virología del Hospital de Niños Dr. Ricardo Gutierrez on behalf of 'Proyecto Argentino Interinstitucional de genomica de SARS-CoV-2' (PAIS Consortium)	Nabaes Jodar et al
EPI_ISL_792371,EPI_ISL_792372,EPI_ISL_792373,EPI_ISL_792374	Laboratorio del Hospital Interzonal General de Agudos Eva Perón	Área de Secuenciación del Laboratorio de Virología del Hospital de Niños Dr. Ricardo Gutierrez on behalf of 'Proyecto Argentino Interinstitucional de genomica de SARS-CoV-2' (PAIS Consortium)	Nabaes Jodar et al
EPI_ISL_961705	Ospedale San Salvatore UOC Malattie Infettive	Istituto Zooprofilattico Sperimentale dell’Abruzzo e Molise “G. Caporale”	Lorusso A et al
EPI_ISL_759967	RSUD Dr. Iskak Tulungagung	Institute of Tropical Disease, Universitas Airlangga	Rima R Prasetya et al
EPI_ISL_903973,EPI_ISL_903964,EPI_ISL_903959,EPI_ISL_903743,EPI_ISL_903922,EPI_ISL_903969,EPI_ISL_903976,EPI_ISL_903793,EPI_ISL_903864	DC Public Health Lab/ Dept. of Forensic Sciences	Genomics and Discovery, Respiratory Viruses Branch, Division of Viral Diseases, Centers for Disease Control and Prevention	Krista Queen et al
EPI_ISL_735391	CHU Tours	CNR Virus des Infections Respiratoires - France SUD	Antonin Bal et al
EPI_ISL_947247	RSU Bunda Mulia	Eijkman Institute for Molecular Biology, Ministry of Research and Technology/National Agency for Research and Innovation	Edison Johar et al
EPI_ISL_847831,EPI_ISL_847832	Yale New Haven Hospital	Grubaugh Lab - Yale School of Public Health	Tara Alpert et al
EPI_ISL_430401,EPI_ISL_421718,EPI_ISL_421723,EPI_ISL_430356,EPI_ISL_430371,EPI_ISL_430394,EPI_ISL_430403,EPI_ISL_430405,EPI_ISL_430428,EPI_ISL_435483,EPI_ISL_435488,EPI_ISL_435519,EPI_ISL_444655,EPI_ISL_444670,EPI_ISL_444742,EPI_ISL_444744,EPI_ISL_444755,EPI_ISL_444780,EPI_ISL_450399,EPI_ISL_456051,EPI_ISL_421584,EPI_ISL_421585,EPI_ISL_456113,EPI_ISL_421712,EPI_ISL_421713,EPI_ISL_421714,EPI_ISL_4…	NYU Langone Health	Departments of Pathology and Medicine, New York University School of Medicine	Maria Aguero-Rosenfeld et al
EPI_ISL_918424,EPI_ISL_918425	Bundeswehrzentralkrankenhaus Koblenz	Bundeswehr Institute of Microbiology	Markus Antwerpen et al
EPI_ISL_779169,EPI_ISL_779170,EPI_ISL_779171,EPI_ISL_779172,EPI_ISL_779173,EPI_ISL_779174,EPI_ISL_779175,EPI_ISL_779176,EPI_ISL_779177,EPI_ISL_779178,EPI_ISL_779179,EPI_ISL_779180,EPI_ISL_779181,EPI_ISL_779182,EPI_ISL_779183,EPI_ISL_779184,EPI_ISL_961792,EPI_ISL_961791,EPI_ISL_961785,EPI_ISL_961781,EPI_ISL_961777,EPI_ISL_961774,EPI_ISL_961767,EPI_ISL_961768,EPI_ISL_961760,EPI_ISL_961762,EPI_ISL_9…	Laboratorio de Infectología, Servicio de Infectología, Hospital Universitario Dr. José Eleuterio González - Universidad Autónoma de Nuevo León	Laboratorio de Infectología Molecular, Departamento de Bioquímica y Medicina Molecular,Facultad de Medicina - Universidad Autónoma de Nuevo León	Kame A. Galán-Huerta et al
EPI_ISL_914832,EPI_ISL_914833	LABORATORIO CLINICO LABIN	Inciensa, Instituto Costarricense de Investigación y Enseñanza en Nutrición y Salud	Francisco Duarte et al
EPI_ISL_632994,EPI_ISL_632995,EPI_ISL_632996,EPI_ISL_632997,EPI_ISL_632998,EPI_ISL_633063,EPI_ISL_671690,EPI_ISL_671760,EPI_ISL_683856,EPI_ISL_683891,EPI_ISL_683904,EPI_ISL_683910,EPI_ISL_683970,EPI_ISL_683935,EPI_ISL_683821,EPI_ISL_683827,EPI_ISL_745419,EPI_ISL_745420,EPI_ISL_745445,EPI_ISL_745448,EPI_ISL_745452,EPI_ISL_745454,EPI_ISL_823942,EPI_ISL_823936,EPI_ISL_823935,EPI_ISL_823925,EPI_ISL_8…	DOHMH Crown Heights	New York City Public Health Laboratory	Jade Wang et al
EPI_ISL_475056	Dr. N. D. Desai Medical College & Hospital	Gujarat Biotechnology Research Centre	Dinesh Kumar et al
EPI_ISL_683690,EPI_ISL_683691,EPI_ISL_683692,EPI_ISL_683693,EPI_ISL_683694,EPI_ISL_683696,EPI_ISL_683697,EPI_ISL_683698,EPI_ISL_683699,EPI_ISL_683700,EPI_ISL_683701,EPI_ISL_683702,EPI_ISL_683703,EPI_ISL_683704,EPI_ISL_683705,EPI_ISL_683706,EPI_ISL_683707,EPI_ISL_683708,EPI_ISL_683709,EPI_ISL_683710,EPI_ISL_683711,EPI_ISL_683712,EPI_ISL_683713,EPI_ISL_708484,EPI_ISL_770808,EPI_ISL_770809,EPI_ISL_7…	Essentia Health-St. Mary's Medical Center	Minnesota Department of Health, Public Health Laboratory	Alexandra Lorentz et al
EPI_ISL_862040,EPI_ISL_862039,EPI_ISL_862041,EPI_ISL_872188,EPI_ISL_872189,EPI_ISL_872190,EPI_ISL_885142	RSUP Dr. Sardjito	Genetics Working Group (Pokja Genetik) Faculty of Medicine, Public Health and Nursing Universitas Gadjah Mada (FK-KMK UGM); Disease Investigation Center Wates Ministry of Agriculture Indonesia; Department of Microbiology FK-KMK UGM; Laboratorium Diagnostik Yayasan Tahija World Mosquito Program (WMP) Yogyakarta Center for Tropical Medicine FK-KMK UGM; Integrated Research Center FK-KMK UGM; Departm…	Gunadi et al
EPI_ISL_475054	GMERS Medical College & Hospital	Gujarat Biotechnology Research Centre	Nitin Savaliya et al
EPI_ISL_669323,EPI_ISL_669324,EPI_ISL_669325,EPI_ISL_669326,EPI_ISL_669327,EPI_ISL_669328,EPI_ISL_669329,EPI_ISL_669330,EPI_ISL_669331,EPI_ISL_669332,EPI_ISL_668700,EPI_ISL_669333,EPI_ISL_668837,EPI_ISL_669334,EPI_ISL_669335,EPI_ISL_668818,EPI_ISL_669336,EPI_ISL_669337,EPI_ISL_669338,EPI_ISL_669339,EPI_ISL_669340,EPI_ISL_669341,EPI_ISL_669342,EPI_ISL_668701,EPI_ISL_668461,EPI_ISL_669343,EPI_ISL_6…	Department of Virus and Microbiological Special Diagnostics, Statens Serum Institut, Copenhagen, Denmark	Albertsen Lab, Department of Chemistry and Bioscience, Aalborg University, Denmark	Danish Covid-19 Genome Consortium et al
EPI_ISL_669815,EPI_ISL_670357,EPI_ISL_670358,EPI_ISL_669516,EPI_ISL_670359,EPI_ISL_670360,EPI_ISL_669802,EPI_ISL_670361,EPI_ISL_670362,EPI_ISL_669715,EPI_ISL_670363,EPI_ISL_669542,EPI_ISL_670364,EPI_ISL_669626,EPI_ISL_670365,EPI_ISL_670366,EPI_ISL_670367,EPI_ISL_669746,EPI_ISL_670368,EPI_ISL_669803,EPI_ISL_669517,EPI_ISL_670369,EPI_ISL_670370,EPI_ISL_670371,EPI_ISL_669830,EPI_ISL_670372,EPI_ISL_6…	Department of Virus and Microbiological Special Diagnostics, Statens Serum Institut, Copenhagen, Denmark	Albertsen Lab, Department of Chemistry and Bioscience, Aalborg University, Denmark	Danish Covid-19 Genome Consortium et al
EPI_ISL_682391,EPI_ISL_682392,EPI_ISL_682393,EPI_ISL_682394,EPI_ISL_682395,EPI_ISL_682396,EPI_ISL_682397,EPI_ISL_682398,EPI_ISL_682400,EPI_ISL_682401,EPI_ISL_682402,EPI_ISL_682403,EPI_ISL_682404,EPI_ISL_682405,EPI_ISL_682406,EPI_ISL_682407,EPI_ISL_682408,EPI_ISL_682409,EPI_ISL_682410,EPI_ISL_682411,EPI_ISL_682412,EPI_ISL_682413,EPI_ISL_682414,EPI_ISL_682415,EPI_ISL_682416,EPI_ISL_682417,EPI_ISL_6…	Department of Virus and Microbiological Special Diagnostics, Statens Serum Institut, Copenhagen, Denmark	Albertsen Lab, Department of Chemistry and Bioscience, Aalborg University, Denmark	Danish Covid-19 Genome Consortium et al
EPI_ISL_712735,EPI_ISL_712265,EPI_ISL_712736,EPI_ISL_712737,EPI_ISL_712738,EPI_ISL_712739,EPI_ISL_712266,EPI_ISL_712740,EPI_ISL_712741,EPI_ISL_712742,EPI_ISL_712162,EPI_ISL_712227,EPI_ISL_712373,EPI_ISL_712163,EPI_ISL_712374,EPI_ISL_712743,EPI_ISL_712744,EPI_ISL_712267,EPI_ISL_712375,EPI_ISL_712745,EPI_ISL_712376,EPI_ISL_712746,EPI_ISL_712377,EPI_ISL_712747,EPI_ISL_712748,EPI_ISL_712378,EPI_ISL_7…	Department of Virus and Microbiological Special Diagnostics, Statens Serum Institut, Copenhagen, Denmark	Albertsen Lab, Department of Chemistry and Bioscience, Aalborg University, Denmark	Danish Covid-19 Genome Consortium et al
EPI_ISL_711715,EPI_ISL_711385,EPI_ISL_711183,EPI_ISL_711716,EPI_ISL_711717,EPI_ISL_711718,EPI_ISL_711349,EPI_ISL_711719,EPI_ISL_711124,EPI_ISL_711720,EPI_ISL_711721,EPI_ISL_711722,EPI_ISL_711723,EPI_ISL_711724,EPI_ISL_711725,EPI_ISL_711726,EPI_ISL_711727,EPI_ISL_711728,EPI_ISL_711125,EPI_ISL_711126,EPI_ISL_711729,EPI_ISL_711424,EPI_ISL_711071,EPI_ISL_711730,EPI_ISL_711292,EPI_ISL_711731,EPI_ISL_7…	Department of Virus and Microbiological Special Diagnostics, Statens Serum Institut, Copenhagen, Denmark	Albertsen Lab, Department of Chemistry and Bioscience, Aalborg University, Denmark	Danish Covid-19 Genome Consortium et al
EPI_ISL_713789,EPI_ISL_713790,EPI_ISL_713791,EPI_ISL_713792,EPI_ISL_713160,EPI_ISL_713213,EPI_ISL_713377,EPI_ISL_713793,EPI_ISL_713794,EPI_ISL_713795,EPI_ISL_713796,EPI_ISL_713797,EPI_ISL_713798,EPI_ISL_713799,EPI_ISL_713426,EPI_ISL_713445,EPI_ISL_713208,EPI_ISL_713446,EPI_ISL_713800,EPI_ISL_713161,EPI_ISL_713801,EPI_ISL_713802,EPI_ISL_713803,EPI_ISL_713804,EPI_ISL_713378,EPI_ISL_713162,EPI_ISL_7…	Department of Virus and Microbiological Special Diagnostics, Statens Serum Institut, Copenhagen, Denmark	Albertsen Lab, Department of Chemistry and Bioscience, Aalborg University, Denmark	Danish Covid-19 Genome Consortium et al
EPI_ISL_714744,EPI_ISL_714745,EPI_ISL_714113,EPI_ISL_714746,EPI_ISL_714747,EPI_ISL_714748,EPI_ISL_714195,EPI_ISL_714150,EPI_ISL_714749,EPI_ISL_714750,EPI_ISL_714751,EPI_ISL_714224,EPI_ISL_714752,EPI_ISL_714753,EPI_ISL_714204,EPI_ISL_714754,EPI_ISL_714234,EPI_ISL_714246,EPI_ISL_714755,EPI_ISL_714401,EPI_ISL_714756,EPI_ISL_714114,EPI_ISL_714757,EPI_ISL_714477,EPI_ISL_714758,EPI_ISL_714759,EPI_ISL_7…	Department of Virus and Microbiological Special Diagnostics, Statens Serum Institut, Copenhagen, Denmark	Albertsen Lab, Department of Chemistry and Bioscience, Aalborg University, Denmark	Danish Covid-19 Genome Consortium et al
EPI_ISL_750462,EPI_ISL_750352,EPI_ISL_750972,EPI_ISL_750973,EPI_ISL_750974,EPI_ISL_750975,EPI_ISL_750976,EPI_ISL_750977,EPI_ISL_750978,EPI_ISL_750237,EPI_ISL_750979,EPI_ISL_750980,EPI_ISL_750981,EPI_ISL_750353,EPI_ISL_750238,EPI_ISL_750982,EPI_ISL_750983,EPI_ISL_750984,EPI_ISL_750985,EPI_ISL_750293,EPI_ISL_750986,EPI_ISL_750987,EPI_ISL_750988,EPI_ISL_750989,EPI_ISL_750990,EPI_ISL_750991,EPI_ISL_7…	Department of Virus and Microbiological Special Diagnostics, Statens Serum Institut, Copenhagen, Denmark	Albertsen Lab, Department of Chemistry and Bioscience, Aalborg University, Denmark	Danish Covid-19 Genome Consortium et al
EPI_ISL_749983,EPI_ISL_749463,EPI_ISL_749267,EPI_ISL_749984,EPI_ISL_749332,EPI_ISL_749985,EPI_ISL_749397,EPI_ISL_749398,EPI_ISL_749291,EPI_ISL_749986,EPI_ISL_749240,EPI_ISL_749987,EPI_ISL_749988,EPI_ISL_749989,EPI_ISL_749990,EPI_ISL_749991,EPI_ISL_749992,EPI_ISL_749333,EPI_ISL_749241,EPI_ISL_749993,EPI_ISL_749994,EPI_ISL_749995,EPI_ISL_749996,EPI_ISL_749997,EPI_ISL_749399,EPI_ISL_749242,EPI_ISL_7…	Department of Virus and Microbiological Special Diagnostics, Statens Serum Institut, Copenhagen, Denmark	Albertsen Lab, Department of Chemistry and Bioscience, Aalborg University, Denmark	Danish Covid-19 Genome Consortium et al
EPI_ISL_748376,EPI_ISL_748988,EPI_ISL_748989,EPI_ISL_748990,EPI_ISL_748453,EPI_ISL_748991,EPI_ISL_748992,EPI_ISL_748513,EPI_ISL_748993,EPI_ISL_748994,EPI_ISL_748377,EPI_ISL_748995,EPI_ISL_748996,EPI_ISL_748322,EPI_ISL_748997,EPI_ISL_748231,EPI_ISL_748998,EPI_ISL_748999,EPI_ISL_749000,EPI_ISL_749001,EPI_ISL_749002,EPI_ISL_749003,EPI_ISL_749004,EPI_ISL_749005,EPI_ISL_748378,EPI_ISL_748379,EPI_ISL_7…	Department of Virus and Microbiological Special Diagnostics, Statens Serum Institut, Copenhagen, Denmark	Albertsen Lab, Department of Chemistry and Bioscience, Aalborg University, Denmark	Danish Covid-19 Genome Consortium et al
EPI_ISL_758862,EPI_ISL_759209,EPI_ISL_758904,EPI_ISL_758991,EPI_ISL_759210,EPI_ISL_758741,EPI_ISL_758905,EPI_ISL_759047,EPI_ISL_758992,EPI_ISL_759071,EPI_ISL_759211,EPI_ISL_758859,EPI_ISL_759212,EPI_ISL_758742,EPI_ISL_759213,EPI_ISL_759214,EPI_ISL_759215,EPI_ISL_759216,EPI_ISL_759217,EPI_ISL_758743,EPI_ISL_759218,EPI_ISL_759219,EPI_ISL_758744,EPI_ISL_759220,EPI_ISL_759221,EPI_ISL_758875,EPI_ISL_7…	Department of Virus and Microbiological Special Diagnostics, Statens Serum Institut, Copenhagen, Denmark	Albertsen Lab, Department of Chemistry and Bioscience, Aalborg University, Denmark	Danish Covid-19 Genome Consortium et al
EPI_ISL_758238,EPI_ISL_757994,EPI_ISL_758103,EPI_ISL_758239,EPI_ISL_757750,EPI_ISL_757907,EPI_ISL_757995,EPI_ISL_757880,EPI_ISL_758118,EPI_ISL_758078,EPI_ISL_757751,EPI_ISL_758240,EPI_ISL_758241,EPI_ISL_758242,EPI_ISL_758243,EPI_ISL_758244,EPI_ISL_758245,EPI_ISL_758246,EPI_ISL_757715,EPI_ISL_758247,EPI_ISL_758248,EPI_ISL_758249,EPI_ISL_757908,EPI_ISL_758250,EPI_ISL_757996,EPI_ISL_758251,EPI_ISL_7…	Department of Virus and Microbiological Special Diagnostics, Statens Serum Institut, Copenhagen, Denmark	Albertsen Lab, Department of Chemistry and Bioscience, Aalborg University, Denmark	Danish Covid-19 Genome Consortium et al
EPI_ISL_757657,EPI_ISL_757437,EPI_ISL_757459,EPI_ISL_757658,EPI_ISL_757659,EPI_ISL_757449,EPI_ISL_757660,EPI_ISL_757661,EPI_ISL_757662,EPI_ISL_757438,EPI_ISL_757398,EPI_ISL_757498,EPI_ISL_757663,EPI_ISL_757664,EPI_ISL_757665,EPI_ISL_757666,EPI_ISL_757667,EPI_ISL_757439,EPI_ISL_757668,EPI_ISL_757469,EPI_ISL_757495,EPI_ISL_757669,EPI_ISL_757670,EPI_ISL_757485,EPI_ISL_757486,EPI_ISL_757440,EPI_ISL_7…	Department of Virus and Microbiological Special Diagnostics, Statens Serum Institut, Copenhagen, Denmark	Albertsen Lab, Department of Chemistry and Bioscience, Aalborg University, Denmark	Danish Covid-19 Genome Consortium et al
EPI_ISL_793864,EPI_ISL_793351,EPI_ISL_793865,EPI_ISL_793372,EPI_ISL_793089,EPI_ISL_793866,EPI_ISL_793202,EPI_ISL_793867,EPI_ISL_793868,EPI_ISL_793131,EPI_ISL_793239,EPI_ISL_793869,EPI_ISL_793870,EPI_ISL_793871,EPI_ISL_793872,EPI_ISL_793873,EPI_ISL_793305,EPI_ISL_793874,EPI_ISL_793875,EPI_ISL_793125,EPI_ISL_793395,EPI_ISL_793876,EPI_ISL_793385,EPI_ISL_793019,EPI_ISL_793877,EPI_ISL_793878,EPI_ISL_7…	Department of Virus and Microbiological Special Diagnostics, Statens Serum Institut, Copenhagen, Denmark	Albertsen Lab, Department of Chemistry and Bioscience, Aalborg University, Denmark	Danish Covid-19 Genome Consortium et al
EPI_ISL_795691,EPI_ISL_795692,EPI_ISL_795693,EPI_ISL_795694,EPI_ISL_795695,EPI_ISL_795226,EPI_ISL_795028,EPI_ISL_795696,EPI_ISL_795095,EPI_ISL_795697,EPI_ISL_795698,EPI_ISL_795699,EPI_ISL_795700,EPI_ISL_795193,EPI_ISL_795096,EPI_ISL_795322,EPI_ISL_795701,EPI_ISL_795702,EPI_ISL_795703,EPI_ISL_795227,EPI_ISL_795323,EPI_ISL_795373,EPI_ISL_795324,EPI_ISL_795042,EPI_ISL_795171,EPI_ISL_795097,EPI_ISL_7…	Department of Virus and Microbiological Special Diagnostics, Statens Serum Institut, Copenhagen, Denmark	Albertsen Lab, Department of Chemistry and Bioscience, Aalborg University, Denmark	Danish Covid-19 Genome Consortium et al
EPI_ISL_818168,EPI_ISL_818384,EPI_ISL_819057,EPI_ISL_819058,EPI_ISL_818596,EPI_ISL_818597,EPI_ISL_818169,EPI_ISL_818969,EPI_ISL_818298,EPI_ISL_818598,EPI_ISL_818795,EPI_ISL_818420,EPI_ISL_818970,EPI_ISL_819059,EPI_ISL_818303,EPI_ISL_819060,EPI_ISL_818385,EPI_ISL_818971,EPI_ISL_819061,EPI_ISL_819062,EPI_ISL_818599,EPI_ISL_818421,EPI_ISL_818796,EPI_ISL_818170,EPI_ISL_818600,EPI_ISL_818244,EPI_ISL_8…	Department of Virus and Microbiological Special Diagnostics, Statens Serum Institut, Copenhagen, Denmark	Albertsen Lab, Department of Chemistry and Bioscience, Aalborg University, Denmark	Danish Covid-19 Genome Consortium et al
EPI_ISL_817757,EPI_ISL_817758,EPI_ISL_817498,EPI_ISL_817759,EPI_ISL_817760,EPI_ISL_817761,EPI_ISL_817762,EPI_ISL_817763,EPI_ISL_817542,EPI_ISL_817342,EPI_ISL_817430,EPI_ISL_817484,EPI_ISL_817764,EPI_ISL_817765,EPI_ISL_817766,EPI_ISL_817343,EPI_ISL_817767,EPI_ISL_817768,EPI_ISL_817769,EPI_ISL_817513,EPI_ISL_817318,EPI_ISL_817770,EPI_ISL_817514,EPI_ISL_817771,EPI_ISL_817772,EPI_ISL_817773,EPI_ISL_8…	Department of Virus and Microbiological Special Diagnostics, Statens Serum Institut, Copenhagen, Denmark	Albertsen Lab, Department of Chemistry and Bioscience, Aalborg University, Denmark	Danish Covid-19 Genome Consortium et al
EPI_ISL_815914,EPI_ISL_815915,EPI_ISL_815916,EPI_ISL_815579,EPI_ISL_815917,EPI_ISL_815918,EPI_ISL_815435,EPI_ISL_815919,EPI_ISL_815483,EPI_ISL_815920,EPI_ISL_815625,EPI_ISL_815921,EPI_ISL_815922,EPI_ISL_815626,EPI_ISL_815923,EPI_ISL_815619,EPI_ISL_815924,EPI_ISL_815925,EPI_ISL_815620,EPI_ISL_815926,EPI_ISL_815927,EPI_ISL_815928,EPI_ISL_815490,EPI_ISL_815929,EPI_ISL_815436,EPI_ISL_815930,EPI_ISL_8…	Department of Virus and Microbiological Special Diagnostics, Statens Serum Institut, Copenhagen, Denmark	Albertsen Lab, Department of Chemistry and Bioscience, Aalborg University, Denmark	Danish Covid-19 Genome Consortium et al
EPI_ISL_845461,EPI_ISL_845462,EPI_ISL_845463,EPI_ISL_844544,EPI_ISL_845464,EPI_ISL_845518,EPI_ISL_844725,EPI_ISL_844608,EPI_ISL_845221,EPI_ISL_844890,EPI_ISL_845222,EPI_ISL_845365,EPI_ISL_845465,EPI_ISL_844773,EPI_ISL_844649,EPI_ISL_844609,EPI_ISL_845223,EPI_ISL_844610,EPI_ISL_844972,EPI_ISL_845519,EPI_ISL_844728,EPI_ISL_845466,EPI_ISL_844795,EPI_ISL_844611,EPI_ISL_845467,EPI_ISL_844679,EPI_ISL_8…	Department of Virus and Microbiological Special Diagnostics, Statens Serum Institut, Copenhagen, Denmark	Albertsen Lab, Department of Chemistry and Bioscience, Aalborg University, Denmark	Danish Covid-19 Genome Consortium et al
EPI_ISL_843949,EPI_ISL_843950,EPI_ISL_843951,EPI_ISL_843952,EPI_ISL_843953,EPI_ISL_843954,EPI_ISL_843955,EPI_ISL_843956,EPI_ISL_843957,EPI_ISL_843958,EPI_ISL_843960,EPI_ISL_843962,EPI_ISL_843963,EPI_ISL_843964,EPI_ISL_843965,EPI_ISL_843966,EPI_ISL_843968,EPI_ISL_843969,EPI_ISL_843970,EPI_ISL_843971,EPI_ISL_843972,EPI_ISL_843370,EPI_ISL_843974,EPI_ISL_843975,EPI_ISL_843976,EPI_ISL_843977,EPI_ISL_8…	Department of Virus and Microbiological Special Diagnostics, Statens Serum Institut, Copenhagen, Denmark	Albertsen Lab, Department of Chemistry and Bioscience, Aalborg University, Denmark	Danish Covid-19 Genome Consortium et al
EPI_ISL_847078,EPI_ISL_846778,EPI_ISL_847079,EPI_ISL_846864,EPI_ISL_847343,EPI_ISL_846848,EPI_ISL_847080,EPI_ISL_847081,EPI_ISL_847082,EPI_ISL_847230,EPI_ISL_847465,EPI_ISL_847346,EPI_ISL_847466,EPI_ISL_847467,EPI_ISL_847468,EPI_ISL_847083,EPI_ISL_847469,EPI_ISL_847470,EPI_ISL_847084,EPI_ISL_847471,EPI_ISL_847472,EPI_ISL_847085,EPI_ISL_846897,EPI_ISL_847086,EPI_ISL_847195,EPI_ISL_847473,EPI_ISL_8…	Department of Virus and Microbiological Special Diagnostics, Statens Serum Institut, Copenhagen, Denmark	Albertsen Lab, Department of Chemistry and Bioscience, Aalborg University, Denmark	Danish Covid-19 Genome Consortium et al
EPI_ISL_668516,EPI_ISL_668816,EPI_ISL_669300,EPI_ISL_668698,EPI_ISL_669301,EPI_ISL_669302,EPI_ISL_669303,EPI_ISL_668463,EPI_ISL_668496,EPI_ISL_669304,EPI_ISL_669305,EPI_ISL_668545,EPI_ISL_668661,EPI_ISL_669306,EPI_ISL_669307,EPI_ISL_669308,EPI_ISL_669309,EPI_ISL_669310,EPI_ISL_668699,EPI_ISL_668662,EPI_ISL_669311,EPI_ISL_669312,EPI_ISL_668817,EPI_ISL_669313,EPI_ISL_669314,EPI_ISL_669315,EPI_ISL_6…	Department of Virus and Microbiological Special Diagnostics, Statens Serum Institut, Copenhagen, Denmark	Albertsen Lab, Department of Chemistry and Bioscience, Aalborg University, Denmark	Danish Covid-19 Genome Consortium et al
EPI_ISL_451155,EPI_ISL_455017	Government Medical College, Vadodara	Gujarat Biotechnology Research Centre	Tanuja Javadekar et al
EPI_ISL_648168,EPI_ISL_648167,EPI_ISL_648166	Eskilstuna	The Public Health Agency of Sweden	Anna-Malin Linde et al
EPI_ISL_513343,EPI_ISL_513344	Children Westmead Hospital	NSW Health Pathology - Institute of Clinical Pathology and Medical Research; Westmead Hospital; University of Sydney	CIDM-PH et al. et al
EPI_ISL_925847,EPI_ISL_925848,EPI_ISL_925849,EPI_ISL_925850,EPI_ISL_925851,EPI_ISL_925852,EPI_ISL_925853,EPI_ISL_925854,EPI_ISL_925855,EPI_ISL_925856,EPI_ISL_925857,EPI_ISL_925858,EPI_ISL_925859,EPI_ISL_930634,EPI_ISL_925860,EPI_ISL_925861,EPI_ISL_925862,EPI_ISL_925863,EPI_ISL_930567,EPI_ISL_925864,EPI_ISL_925865,EPI_ISL_925866,EPI_ISL_925867,EPI_ISL_925868,EPI_ISL_925869,EPI_ISL_925870,EPI_ISL_9…	Nucleic Acid Testing, National Reference Laboratory	GIGA Medical Genomics	Yvan Butera et al
EPI_ISL_634831,EPI_ISL_700362	Laboratoire de virologie, CHU de Grenoble - CS 10217 - 38043 Grenoble cedex 23	CNR Virus des Infections Respiratoires - France SUD	Antonin Bal et al
EPI_ISL_755304	Laboratorio de Virología, Centro de Biotecnología Acuícola, Universidad de Santiato de Chile	Center for Mathematical Modeling and Center for Genome Regulation. Santiago, Chile	A. Sandino et al
EPI_ISL_479625,EPI_ISL_479626,EPI_ISL_479627,EPI_ISL_479628,EPI_ISL_479629,EPI_ISL_479630,EPI_ISL_479631,EPI_ISL_479632,EPI_ISL_479633,EPI_ISL_479634,EPI_ISL_479635,EPI_ISL_479636,EPI_ISL_479637,EPI_ISL_479638,EPI_ISL_479639,EPI_ISL_479640,EPI_ISL_479641,EPI_ISL_479642,EPI_ISL_479643,EPI_ISL_479644,EPI_ISL_479645,EPI_ISL_479646,EPI_ISL_479647,EPI_ISL_479648,EPI_ISL_479649,EPI_ISL_479650,EPI_ISL_4…	Dr. Georges-L.-Dumont University Hospital Centre	National Microbiology Laboratory	Anna Majer et al
EPI_ISL_871789,EPI_ISL_871792	Cerballiance Normandie	CERBA LAB	LAFOREST D et al
EPI_ISL_955261,EPI_ISL_955263,EPI_ISL_984753,EPI_ISL_984948	Fulgent Genetics	Fulgent Genetics	Harry Gao et al
EPI_ISL_934419,EPI_ISL_877005,EPI_ISL_877006,EPI_ISL_877021,EPI_ISL_877022,EPI_ISL_877026,EPI_ISL_877027,EPI_ISL_877030,EPI_ISL_877032,EPI_ISL_918457,EPI_ISL_935115,EPI_ISL_918459,EPI_ISL_935131,EPI_ISL_876984,EPI_ISL_876986,EPI_ISL_935151,EPI_ISL_918463,EPI_ISL_876987,EPI_ISL_876988,EPI_ISL_876989,EPI_ISL_876975,EPI_ISL_876990,EPI_ISL_876991,EPI_ISL_876992,EPI_ISL_918464,EPI_ISL_918465,EPI_ISL_9…	1.AO Universitaria 'S. Giovanni di Dio e Ruggi D'Aragona, Scuola Medica Salernitana' Hospital / 2.UOC di Virologia e Microbiologia, Università della Campania 'L. Vanvitelli' / 3.AO Universitaria 'Federico II' Napoli Hospital / 4.AORN 'San Giuseppe Moscati' Avellino Hospital / 5.AO 'San Pio - presidio G. Rummo' Benevento Hospital / 6.AO 'Sant'Anna e San Sebastiano' Caserta Hospital / 7.PO 'Maria S…	1. Genome Research Center for Health (CRGS) / 2. Laboratory of Molecular Medicine and Genomics(LMMGe) / 3. Center for Research in Pure and Applied Mathematics (CRMPA)	Giorgio Giurato (Corresponding Author) et al
EPI_ISL_437684,EPI_ISL_437685,EPI_ISL_437686,EPI_ISL_437687,EPI_ISL_437688	UCD National Virus Reference Laboratory	UCD National Virus Reference Laboratory	Michael J. Carr et al
EPI_ISL_831974	Klinisk mikrobiologi NAL Trollhattan	The Public Health Agency of Sweden	Department of Microbiology et al
EPI_ISL_833040	RSUD Dr. Abdul Aziz Singkawang	National Institute of Health Research and Development	Subangkit et al
EPI_ISL_934377,EPI_ISL_913378,EPI_ISL_913379,EPI_ISL_913380,EPI_ISL_913381,EPI_ISL_913382,EPI_ISL_913383,EPI_ISL_913384,EPI_ISL_913385,EPI_ISL_913277,EPI_ISL_913386,EPI_ISL_913387,EPI_ISL_913388,EPI_ISL_913275,EPI_ISL_913389,EPI_ISL_913309,EPI_ISL_913390,EPI_ISL_913281,EPI_ISL_913391,EPI_ISL_913392,EPI_ISL_913454,EPI_ISL_913459	Dynamic Code AB	The Public Health Agency of Sweden	Anna-Malin Linde et al
EPI_ISL_512846	O.I.J. MORGUE JUDICIAL	Inciensa, Instituto Costarricense de Investigación y Enseñanza en Nutrición y Salud	Francisco Duarte et al
EPI_ISL_694009,EPI_ISL_694010,EPI_ISL_694011,EPI_ISL_694013,EPI_ISL_694014,EPI_ISL_694016,EPI_ISL_694017,EPI_ISL_694019,EPI_ISL_694020,EPI_ISL_694021,EPI_ISL_694026,EPI_ISL_694027,EPI_ISL_694030,EPI_ISL_694031,EPI_ISL_694032,EPI_ISL_694033,EPI_ISL_694034,EPI_ISL_694035,EPI_ISL_694037,EPI_ISL_694039	TGen North	TGen North	Hayley D Yaglom et al
EPI_ISL_596453	Booali laboratory, Qom, Iran. Department of Virology, School of Public Health, Tehran University of Medical Sciences, Tehran, Iran.	Genetics Research Center, University of Social Welfare and Rehabilitation Sciences	Zohreh Fattahi et al
EPI_ISL_574605	RSUP dr. Sardjito	Eijkman Institute for Molecular Biology, Ministry of Research and Technology/National Agency for Research and Innovation	Frilasita A Yudhaputri et al
EPI_ISL_436199,EPI_ISL_436207,EPI_ISL_436215,EPI_ISL_436223,EPI_ISL_436230,EPI_ISL_436274,EPI_ISL_436387,EPI_ISL_436394,EPI_ISL_420115,EPI_ISL_425183,EPI_ISL_425197,EPI_ISL_425217	Servicio de Microbiología. Consorcio Hospital General Universitario de Valencia	Sequencing and Bioinformatics Service and Molecular Epidemiology Research Group. FISABIO-Public Health	Marta Pla Diaz et al
EPI_ISL_914798,EPI_ISL_914805	AREA DE SALUD CARTAGO	Inciensa, Instituto Costarricense de Investigación y Enseñanza en Nutrición y Salud	Francisco Duarte et al
EPI_ISL_510535	Molecular Virology, Instituto Carlos Chagas / Fiocruz Paraná	Universidade Federal do Parana (UFPR)	Suzukawa et al
EPI_ISL_918515,EPI_ISL_918516,EPI_ISL_918517,EPI_ISL_918522,EPI_ISL_918523,EPI_ISL_918524,EPI_ISL_918525,EPI_ISL_918526,EPI_ISL_918527,EPI_ISL_918528,EPI_ISL_918529,EPI_ISL_918530,EPI_ISL_918545,EPI_ISL_918546,EPI_ISL_918547,EPI_ISL_918548,EPI_ISL_918549,EPI_ISL_918550,EPI_ISL_918552	LACEN - Laboratório Central de Saúde Pública do Para	﻿Evandro Chagas Institute	Santos et al
EPI_ISL_430847	HS mikrobiologi virus	The Public Health Agency of Sweden	Zhibing Yun et al
EPI_ISL_833054,EPI_ISL_833052,EPI_ISL_833053	"Presidio Ospedaliero "San Liberatore" Atri	Istituto Zooprofilattico Sperimentale dell’Abruzzo e Molise “G. Caporale”	Lorusso A et al
EPI_ISL_765818,EPI_ISL_765819,EPI_ISL_765820,EPI_ISL_765821,EPI_ISL_765822,EPI_ISL_765823	North Shore Medical Center	Infectious Disease Program, Broad Institute of Harvard and MIT	Lemieux et al
EPI_ISL_542278,EPI_ISL_542279,EPI_ISL_542280,EPI_ISL_542281,EPI_ISL_542282,EPI_ISL_542283,EPI_ISL_542284,EPI_ISL_542285,EPI_ISL_542286,EPI_ISL_542287,EPI_ISL_542288,EPI_ISL_542289,EPI_ISL_542290,EPI_ISL_542291,EPI_ISL_542292,EPI_ISL_542293,EPI_ISL_542294,EPI_ISL_542295,EPI_ISL_542296,EPI_ISL_542297,EPI_ISL_542298,EPI_ISL_542299,EPI_ISL_542300,EPI_ISL_542301,EPI_ISL_542302,EPI_ISL_542303,EPI_ISL_5…	San Matteo Hospital Pavia	Dep. Of Oncology and Hemato-Oncology University of Milan	Claudia Alteri et al
EPI_ISL_888984	RS Hermina Depok	Eijkman Institute for Molecular Biology, Ministry of Research and Technology/National Agency for Research and Innovation	Edison Johar et al
EPI_ISL_452111,EPI_ISL_452110	FL Bureau of Public Health Laboratories	Pathogen Discovery, Respiratory Viruses Branch, Division of Viral Diseases, Centers for Disease Control and Prevention	Yan Li et al
EPI_ISL_745157,EPI_ISL_745161	SAS Saldanha VPA	National Health Laboratory Service (NHLS), Tygerberg	Susan Engelbrecht et al
EPI_ISL_960116	New Horizon Clinic wc NZC	National Health Laboratory Service/UCT	Arash Iranzadeh et al
EPI_ISL_511908,EPI_ISL_511909,EPI_ISL_511910,EPI_ISL_511911,EPI_ISL_511912,EPI_ISL_511913,EPI_ISL_511914,EPI_ISL_511915,EPI_ISL_511916,EPI_ISL_511917,EPI_ISL_511918,EPI_ISL_511919,EPI_ISL_511920,EPI_ISL_511921,EPI_ISL_511922	All india institute of Medical Sciences Rishikesh	National Institute of Biomedical Genomics - DBT's PAN-INDIA 1000 SARS--CoV-2 RNA Genome Sequencing Consortium	Arindam Maitra et al
EPI_ISL_894224,EPI_ISL_894225,EPI_ISL_894226,EPI_ISL_894220,EPI_ISL_894227,EPI_ISL_894228,EPI_ISL_894229,EPI_ISL_894221,EPI_ISL_894230,EPI_ISL_894231,EPI_ISL_894222,EPI_ISL_909687,EPI_ISL_909697,EPI_ISL_909714,EPI_ISL_909674,EPI_ISL_909708,EPI_ISL_909709,EPI_ISL_912402,EPI_ISL_909715,EPI_ISL_909710,EPI_ISL_909688,EPI_ISL_909689,EPI_ISL_909690,EPI_ISL_909691,EPI_ISL_909692,EPI_ISL_909716,EPI_ISL_9…	CH de Mayotte - Laboratoire de Biologie	National Reference Center for Viruses of Respiratory Infections, Institut Pasteur, Paris	Marion Barbet et al
EPI_ISL_467056,EPI_ISL_467057,EPI_ISL_467055,EPI_ISL_467058,EPI_ISL_468989,EPI_ISL_468974,EPI_ISL_468963,EPI_ISL_468978,EPI_ISL_468972,EPI_ISL_469008,EPI_ISL_468996,EPI_ISL_468961,EPI_ISL_468962,EPI_ISL_468976,EPI_ISL_469004,EPI_ISL_469002,EPI_ISL_468970,EPI_ISL_468985,EPI_ISL_469013,EPI_ISL_469001,EPI_ISL_468979,EPI_ISL_468988,EPI_ISL_469007,EPI_ISL_469010,EPI_ISL_469005,EPI_ISL_468967,EPI_ISL_4…	Servicio de Microbiología, Hospital Universitario Son Espases	SeqCOVID-SPAIN consortium/IBV(CSIC)	Carla López-Causapé et al
EPI_ISL_825047	NHL Municipal Medical College, Ahmedbad	Gujarat Biotechnology Research Centre	Bimal Chauhan et al
EPI_ISL_739336,EPI_ISL_739546,EPI_ISL_739372,EPI_ISL_738506,EPI_ISL_739364,EPI_ISL_739329,EPI_ISL_739101,EPI_ISL_738658	Monterey County Public Health Lab	Chan-Zuckerberg Biohub	CZB Cliahub Consortium et al
EPI_ISL_766698,EPI_ISL_766715,EPI_ISL_766716,EPI_ISL_766717,EPI_ISL_766699,EPI_ISL_766718,EPI_ISL_766719,EPI_ISL_766720,EPI_ISL_766721,EPI_ISL_766722,EPI_ISL_766723,EPI_ISL_766708,EPI_ISL_766695,EPI_ISL_766709	A05 Biomedicum	The Public Health Agency of Sweden	Department of Microbiology et al
EPI_ISL_956280	Institute of Tropical Disease	Institute of Tropical Disease, Universitas Airlangga	Rima R Prasetya et al
EPI_ISL_833254	USCA-Pescina	Istituto Zooprofilattico Sperimentale dell’Abruzzo e Molise “G. Caporale”	Lorusso A et al
EPI_ISL_955256	HGZ 1 CARLOS MC GREGOR	BIOBANCO / COCTI	Borja-Aburto VH et al
EPI_ISL_421171,EPI_ISL_421174,EPI_ISL_421176,EPI_ISL_421180,EPI_ISL_428700,EPI_ISL_428701,EPI_ISL_428702,EPI_ISL_428703,EPI_ISL_428704,EPI_ISL_428705,EPI_ISL_428706,EPI_ISL_428707,EPI_ISL_428708,EPI_ISL_428709,EPI_ISL_428710,EPI_ISL_428711,EPI_ISL_530007,EPI_ISL_530008,EPI_ISL_530009,EPI_ISL_530010,EPI_ISL_530011,EPI_ISL_530012,EPI_ISL_530013,EPI_ISL_530014,EPI_ISL_530015,EPI_ISL_534329,EPI_ISL_5…	Hospital Universitario 12 de Octubre	Hospital Universitario 12 de Octubre	Esther Viedma et al
EPI_ISL_930621,EPI_ISL_930578,EPI_ISL_965512,EPI_ISL_965513,EPI_ISL_965489,EPI_ISL_965515,EPI_ISL_965466,EPI_ISL_965485,EPI_ISL_965486,EPI_ISL_965520,EPI_ISL_965487,EPI_ISL_965338,EPI_ISL_965491,EPI_ISL_965492,EPI_ISL_965488,EPI_ISL_965490,EPI_ISL_965498,EPI_ISL_965522,EPI_ISL_965523,EPI_ISL_965500	St. Nikolaus-Hospital Eupen	GIGA Medical Genomics	Keith Durkin et al
EPI_ISL_954780	COMPLEJO HOSPITALARIO XERAL-CALDE	Instituto de Salud Carlos III	Iglesias-Caballero et al
EPI_ISL_965529,EPI_ISL_965663,EPI_ISL_965532,EPI_ISL_965543,EPI_ISL_965790,EPI_ISL_965702,EPI_ISL_965655,EPI_ISL_965703,EPI_ISL_965617,EPI_ISL_965571,EPI_ISL_965646,EPI_ISL_965771,EPI_ISL_965704,EPI_ISL_965628,EPI_ISL_965596,EPI_ISL_965598,EPI_ISL_965732,EPI_ISL_965722,EPI_ISL_965727,EPI_ISL_965644,EPI_ISL_965709,EPI_ISL_965794,EPI_ISL_965621,EPI_ISL_965557,EPI_ISL_965706,EPI_ISL_965650,EPI_ISL_9…	Dutch COVID-19 response team	Medical Microbiology, Maastricht University Medical Centre	Jozef Dingemans* et al
EPI_ISL_735490	Rangamati General Hospital RT-PCR lab,	Central Biological Research Laboratory and Department of Biochemistry and Molecular Biology	Robiul Hasan Bhuiyan et al
EPI_ISL_977507	Hospital Valle del Nalon	Laboratorio de Virología HUCA	Sandoval M et al
EPI_ISL_438138	Department of Microbiology,Gandhi Medical College and Hospital	Department of Microbiology, Gandhi Medical College and Hospital Secendrabad, Hyderbad, India	Raja Rao Mesipogu et al
EPI_ISL_775585,EPI_ISL_775586,EPI_ISL_789054	Unilabs AB	The Public Health Agency of Sweden	Department of Microbiology et al
EPI_ISL_641520,EPI_ISL_779846,EPI_ISL_693387,EPI_ISL_693388,EPI_ISL_693389,EPI_ISL_693390	CHU de Nice - Hôpital Archet 2	CNR Virus des Infections Respiratoires - France SUD	Antonin Bal et al
EPI_ISL_491907,EPI_ISL_491908,EPI_ISL_491909,EPI_ISL_491910,EPI_ISL_491911,EPI_ISL_491912,EPI_ISL_491913,EPI_ISL_491914,EPI_ISL_491915,EPI_ISL_491916,EPI_ISL_491917,EPI_ISL_491918,EPI_ISL_491919,EPI_ISL_491920,EPI_ISL_491921,EPI_ISL_491922,EPI_ISL_491923,EPI_ISL_491924,EPI_ISL_491925,EPI_ISL_491926,EPI_ISL_491927,EPI_ISL_491942,EPI_ISL_491928,EPI_ISL_491929,EPI_ISL_491930,EPI_ISL_491931,EPI_ISL_4…	Naval Infectious Diseases Diagnostic Laboratory	Naval Medical Research Center Biological Defense Research Directorate	Logan Voegtly et al
EPI_ISL_444486,EPI_ISL_447538	Gujarat Biotechnology Research Centre	Gujarat Biotechnology Research Centre	Snehal Bagatharia et al
EPI_ISL_450793,EPI_ISL_450794,EPI_ISL_450795,EPI_ISL_450796,EPI_ISL_450797,EPI_ISL_450799	Jamaica Ministry of Health and Wellness	Pathogen Discovery, Respiratory Viruses Branch, Division of Viral Diseases, Centers for Disease Control and Prevention	Yan Li et al
EPI_ISL_445221,EPI_ISL_445234,EPI_ISL_445235	Wasterlakarna	The Public Health Agency of Sweden	Frida Ahlfors et al
EPI_ISL_436285,EPI_ISL_436305,EPI_ISL_436325,EPI_ISL_436345,EPI_ISL_436369,EPI_ISL_436396,EPI_ISL_421517,EPI_ISL_447477,EPI_ISL_447491,EPI_ISL_447505,EPI_ISL_447519	Servicio de Microbiologia. Hospital Clinico Universitario de Valencia	Sequencing and Bioinformatics Service and Molecular Epidemiology Research Group. FISABIO-Public Health	Sandra Carbo et al
EPI_ISL_444518	unknown	Molecular Infectious Disease	Anderson et al
EPI_ISL_833512,EPI_ISL_833514,EPI_ISL_833515,EPI_ISL_833521,EPI_ISL_833513,EPI_ISL_833517,EPI_ISL_833516,EPI_ISL_833511,EPI_ISL_833519,EPI_ISL_833518,EPI_ISL_833520	Veterinary Specialized Instute "Nis"	Veterinary Specialized Institute "Kraljevo", Serbia	Vidanovic et al
EPI_ISL_961096,EPI_ISL_875566,EPI_ISL_875567,EPI_ISL_875568,EPI_ISL_833119	SIESP L'AQUILA	Istituto Zooprofilattico Sperimentale dell’Abruzzo e Molise “G. Caporale”	Lorusso A et al
EPI_ISL_420137	Vestfold Hospital, Tonsberg Department of Microbiology	Norwegian Institute of Public Health, Department of Virology	Kathrine Stene-Johansen et al
EPI_ISL_825049	GMERS Medical College and Hospital, Gotri, Vadodara	Gujarat Biotechnology Research Centre	Bithika Duttaroy et al
EPI_ISL_455683,EPI_ISL_455684,EPI_ISL_455686,EPI_ISL_455687,EPI_ISL_455685,EPI_ISL_455688,EPI_ISL_455692,EPI_ISL_455691,EPI_ISL_455693,EPI_ISL_455689,EPI_ISL_455690	unknown	Department of Microbiology	Gao et al
EPI_ISL_779847	Centre Hospotalier Cannes	CNR Virus des Infections Respiratoires - France SUD	Antonin Bal et al
EPI_ISL_977490	Hospital Municipal Guido Guida	Instituto Adolfo Lutz, Interdiciplinary Procedures Center, Strategic Laboratory	Claudio Tavares Sacchi et al
EPI_ISL_754183	Wyoming Public Health Laboratory	Wyoming Public Health Laborator	Noah Hull et al
EPI_ISL_775594	Balitvet Lampung	National Institute of Health Research and Development	Nugraha et al
EPI_ISL_445224,EPI_ISL_450830	Narhalsan Olskroken VC	The Public Health Agency of Sweden	Mahin Ghoroghi et al
EPI_ISL_833228,EPI_ISL_833229	R.P. GUARDIAGRELE Ospedale di Comunità	Istitituto Zooprofilattico Sperimentale dell'Abruzzo e Molise "G.Caporale"	Lorusso A et al
EPI_ISL_918536,EPI_ISL_918537,EPI_ISL_918538,EPI_ISL_918539,EPI_ISL_918540,EPI_ISL_918541,EPI_ISL_918542,EPI_ISL_918543,EPI_ISL_918544	LACEN - Laboratório Central de Saúde Pública do Ceara	﻿Evandro Chagas Institute	Santos et al
EPI_ISL_418248,EPI_ISL_418249,EPI_ISL_416994	COMPLEJO ASISTENCIAL UNIVERSITARIO DE BURGOS	Instituto de Salud Carlos III	Iglesias-Caballero et al
EPI_ISL_751777,EPI_ISL_751586,EPI_ISL_751609,EPI_ISL_751610,EPI_ISL_751741,EPI_ISL_751613,EPI_ISL_751616,EPI_ISL_751788,EPI_ISL_903584	OH Department of Health Laboratory	Genomics and Discovery, Respiratory Viruses Branch, Division of Viral Diseases, Centers for Disease Control and Prevention	Krista Queen et al
EPI_ISL_458111	Gujarat Biotechnology Research Centre	Gujarat Biotechnology Research Centre	Pinal Trivedi et al
EPI_ISL_877458	Anwar Medika General Hospital	Institute of Tropical Disease, Universitas Airlangga	Jezzy R Dewantari et al
EPI_ISL_480784,EPI_ISL_480785,EPI_ISL_420793	NYC Department of Health and Mental Hygiene	Pathogen Discovery, Respiratory Viruses Branch, Division of Viral Diseases, Centers for Disease Control and Prevention	Krista Queen et al
EPI_ISL_475566,EPI_ISL_475520	Vardcentralen Brinken	The Public Health Agency of Sweden	Oskar Karlsson Lindsjo et al
EPI_ISL_454642,EPI_ISL_454645	CT-Dr. Katherine A. Kelley State Public Health Lab	Pathogen Discovery, Respiratory Viruses Branch, Division of Viral Diseases, Centers for Disease Control and Prevention	Jing Zhang et al
EPI_ISL_450839	COVID-19 Laboratory Centre for Advanced Research in Sciences (CARS), University of Dhaka, Dhaka-1000, Bangladesh	DNA Solution Ltd	Sharif Akhteruzzaman et al
EPI_ISL_895786,EPI_ISL_895733,EPI_ISL_895811,EPI_ISL_895799,EPI_ISL_895744,EPI_ISL_895738,EPI_ISL_895842,EPI_ISL_895837,EPI_ISL_895835,EPI_ISL_895735,EPI_ISL_895779,EPI_ISL_895776,EPI_ISL_895775,EPI_ISL_895763,EPI_ISL_895766,EPI_ISL_895805,EPI_ISL_895840,EPI_ISL_895836,EPI_ISL_895757,EPI_ISL_895800,EPI_ISL_895843,EPI_ISL_895844,EPI_ISL_895751,EPI_ISL_895807,EPI_ISL_895750,EPI_ISL_895795,EPI_ISL_8…	Molecular biology division, Institute of Clinical Biochemistry and Diagnostics, Charles University, Faculty of Medicine in Hradec Králové and University Hospital Hradec Králové	Molecular biology division, Institute of Clinical Biochemistry and Diagnostics, Charles University, Faculty of Medicine in Hradec Králové and University Hospital Hradec Králové	Helena Kovaříková et al
EPI_ISL_418990,EPI_ISL_418991,EPI_ISL_416044,EPI_ISL_416046,EPI_ISL_416047,EPI_ISL_416425,EPI_ISL_416473,EPI_ISL_416474	State Key Laboratory for Diagnosis and Treatment of Infectious Diseases, National Clinical Research Center for Infectious Diseases, First Affiliated Hospital, Zhejiang University School of Medicine, Hangzhou, China 310003	State Key Laboratory for Diagnosis and Treatment of Infectious Diseases, National Clinical Research Center for Infectious Diseases, First Affiliated Hospital, Zhejiang University School of Medicine, Hangzhou, China 310003	Hangping Yao et al
EPI_ISL_869150,EPI_ISL_869153,EPI_ISL_869148,EPI_ISL_869160,EPI_ISL_767729,EPI_ISL_869149,EPI_ISL_869159,EPI_ISL_869152,EPI_ISL_869151,EPI_ISL_767735,EPI_ISL_869158,EPI_ISL_767736,EPI_ISL_767737,EPI_ISL_767738,EPI_ISL_671376,EPI_ISL_671374,EPI_ISL_671373,EPI_ISL_671383,EPI_ISL_671386,EPI_ISL_671395,EPI_ISL_671370,EPI_ISL_671359,EPI_ISL_671360,EPI_ISL_671362,EPI_ISL_671364,EPI_ISL_671398,EPI_ISL_6…	National Virus Reference Laboratory	Irish Coronavirus Sequencing Consortium - Teagasc Moorepark	Calum Walsh et al
EPI_ISL_417482,EPI_ISL_477015,EPI_ISL_660529,EPI_ISL_660530,EPI_ISL_660531,EPI_ISL_660532,EPI_ISL_660533,EPI_ISL_660534,EPI_ISL_660535,EPI_ISL_660536,EPI_ISL_660537,EPI_ISL_660538,EPI_ISL_660539,EPI_ISL_728202,EPI_ISL_728203,EPI_ISL_728204,EPI_ISL_803098	Institute of Microbiology, Universidad San Francisco de Quito	Institute of Microbiology, Universidad San Francisco de Quito	Sully Márquez et al
EPI_ISL_416753,EPI_ISL_416754,EPI_ISL_416756,EPI_ISL_416758,EPI_ISL_416747,EPI_ISL_416748,EPI_ISL_416750	Institut des Agents Infectieux (IAI) Hospices Civils de Lyon	CNR Virus des Infections Respiratoires - France SUD	Bal et al
EPI_ISL_547970,EPI_ISL_547971,EPI_ISL_547972,EPI_ISL_547973,EPI_ISL_547974,EPI_ISL_547975,EPI_ISL_548104,EPI_ISL_548105,EPI_ISL_579058,EPI_ISL_547977,EPI_ISL_547986,EPI_ISL_547987,EPI_ISL_547988,EPI_ISL_547989,EPI_ISL_547993,EPI_ISL_547994,EPI_ISL_547995,EPI_ISL_548013,EPI_ISL_548014,EPI_ISL_548015,EPI_ISL_548016,EPI_ISL_548046,EPI_ISL_579099,EPI_ISL_622793,EPI_ISL_622778,EPI_ISL_637084,EPI_ISL_6…	LabTests	Institute of Environmental Science and Research (ESR)	Xiaoyun Ren et al
EPI_ISL_964880	National Institute of Laboratory Medicine and Referral Center	Sher-e-Bangla Nagar, Agargaon, Dhaka-1207, Bangladesh.	Shahina Akter et al
EPI_ISL_483840	Pandit Deendayal Upadhyay Government Medical College, Rajkot	Gujarat Biotechnology Research Centre	Nikha Trivedi et al
EPI_ISL_933805,EPI_ISL_933807,EPI_ISL_933808,EPI_ISL_933809,EPI_ISL_933812,EPI_ISL_933813,EPI_ISL_933814,EPI_ISL_933818,EPI_ISL_933819,EPI_ISL_933820,EPI_ISL_933821,EPI_ISL_933822,EPI_ISL_933823,EPI_ISL_933824,EPI_ISL_933825,EPI_ISL_933826,EPI_ISL_933827,EPI_ISL_933828,EPI_ISL_933829,EPI_ISL_933830,EPI_ISL_933831,EPI_ISL_933832,EPI_ISL_933834,EPI_ISL_933836,EPI_ISL_933838,EPI_ISL_933839,EPI_ISL_9…	Vilnius university hospital Santaros Klinikos, Center of Laboratory Medicine	Vilnius university hospital Santaros Klinikos, Center of Laboratory Medicine	Ingrida Olendraite et al
EPI_ISL_528752	Dr. H. A. Rotinsulu Lung Hospital	School of Pharmacy & School of Life Sciences and Technology - Institut Teknologi Bandung; Molecular Genetics Laboratory-Faculty of Medicine-Universitas Padjadjaran; Laboratorium Kesehatan Provinsi Jawa Barat	Catur Riani et al
EPI_ISL_636969,EPI_ISL_636970,EPI_ISL_636971	Etlik Veterinary Control Central Research Institute	Etlik Veterinary Control Central Research Institute	Sabri Hacioglu et al
EPI_ISL_765530,EPI_ISL_765490,EPI_ISL_765531,EPI_ISL_765532,EPI_ISL_765493,EPI_ISL_765533,EPI_ISL_765534,EPI_ISL_765535,EPI_ISL_765536,EPI_ISL_765537,EPI_ISL_765538,EPI_ISL_765539,EPI_ISL_765489,EPI_ISL_765540,EPI_ISL_765541,EPI_ISL_765494,EPI_ISL_765542,EPI_ISL_765543,EPI_ISL_765544,EPI_ISL_765545,EPI_ISL_765546,EPI_ISL_765547,EPI_ISL_765548,EPI_ISL_765549,EPI_ISL_765550,EPI_ISL_765551,EPI_ISL_7…	MONTEFIORE MEDICAL CENTER LABORATORIES	Wadsworth Center, New York State Department.of Health	Kirsten St. George et al
EPI_ISL_660442	Centre Muraz	Project group Epidemology of Highly Pathogenic Microorganisms, Robert Koch Institut	Soumeya Ouangraoua et al
EPI_ISL_447886	unknown	Pathogen Discovery	Ying Tao et al
EPI_ISL_528426	P. D. Hinduja Hospital and Medical Research Centre	Institute of Genomics and Integrative Biology - Council of Scientific and Industrial Research	Rajesh Pandey et al
EPI_ISL_889008	RS Sentra Medika Cibinong	Eijkman Institute for Molecular Biology, Ministry of Research and Technology/National Agency for Research and Innovation	Edison Johar et al
EPI_ISL_936488	Hospital Queen Elizabeth	Institute for Medical Research, Infectious Disease Research Centre, National Institutes of Health, Ministry of Health Malaysia	Suppiah J et al
EPI_ISL_445326,EPI_ISL_445363,EPI_ISL_445367	ASISTENCIA PUBLICA DR.ALEJANDRO DEL RIO	Instituto de Salud Publica de Chile	Andrés E Castillo et al
EPI_ISL_794649,EPI_ISL_794650	Fundación Cardio Infantil	Instituto Nacional de Salud - Dirección de Investigación en Salud Pública	Katherine Laiton-Donato et al
EPI_ISL_440130,EPI_ISL_440154,EPI_ISL_440225,EPI_ISL_440224,EPI_ISL_440256,EPI_ISL_440212,EPI_ISL_440199,EPI_ISL_440157,EPI_ISL_440135,EPI_ISL_440245,EPI_ISL_440189,EPI_ISL_440249,EPI_ISL_440214,EPI_ISL_440235,EPI_ISL_440190,EPI_ISL_440229,EPI_ISL_440219,EPI_ISL_440187,EPI_ISL_440250,EPI_ISL_440178,EPI_ISL_440210,EPI_ISL_440137,EPI_ISL_440205,EPI_ISL_440172,EPI_ISL_440162,EPI_ISL_440156,EPI_ISL_4…	PHE South West Regional Laboratory, National Infection Service	Wellcome Sanger Institute for the COVID-19 Genomics UK (COG-UK) consortium	Stephanie Hutchings et al
EPI_ISL_469917,EPI_ISL_458942,EPI_ISL_459069,EPI_ISL_459078,EPI_ISL_459080,EPI_ISL_458946,EPI_ISL_458940,EPI_ISL_459006,EPI_ISL_458979,EPI_ISL_459048,EPI_ISL_459000,EPI_ISL_458971,EPI_ISL_459030,EPI_ISL_458981,EPI_ISL_458913,EPI_ISL_458935,EPI_ISL_458944,EPI_ISL_459074,EPI_ISL_459027,EPI_ISL_458950,EPI_ISL_459024,EPI_ISL_459054,EPI_ISL_458949,EPI_ISL_459011,EPI_ISL_459015,EPI_ISL_459001,EPI_ISL_4…	PHE South West Regional Laboratory, National Infection Service	Wellcome Sanger Institute for the COVID-19 Genomics UK (COG-UK) consortium	Stephanie Hutchings et al
EPI_ISL_469495,EPI_ISL_469511,EPI_ISL_469516,EPI_ISL_469509,EPI_ISL_469515,EPI_ISL_469521,EPI_ISL_469512,EPI_ISL_469503,EPI_ISL_469504,EPI_ISL_481953,EPI_ISL_481960,EPI_ISL_481834,EPI_ISL_481858,EPI_ISL_481935,EPI_ISL_481884,EPI_ISL_481954,EPI_ISL_481817,EPI_ISL_481803,EPI_ISL_481887,EPI_ISL_481842,EPI_ISL_481869,EPI_ISL_481906,EPI_ISL_481837,EPI_ISL_481820,EPI_ISL_481902,EPI_ISL_481784,EPI_ISL_4…	PHE South West Regional Laboratory, National Infection Service	Wellcome Sanger Institute for the COVID-19 Genomics UK (COG-UK) consortium	Stephanie Hutchings et al
EPI_ISL_492390,EPI_ISL_492395,EPI_ISL_492299,EPI_ISL_492277,EPI_ISL_492276,EPI_ISL_492433,EPI_ISL_492401,EPI_ISL_492448,EPI_ISL_492294,EPI_ISL_492248,EPI_ISL_492400,EPI_ISL_492360,EPI_ISL_492212,EPI_ISL_492273,EPI_ISL_492378,EPI_ISL_492405,EPI_ISL_492379,EPI_ISL_492292,EPI_ISL_492230,EPI_ISL_492367,EPI_ISL_492233,EPI_ISL_492373,EPI_ISL_492271,EPI_ISL_492265,EPI_ISL_492250,EPI_ISL_492391,EPI_ISL_4…	PHE South West Regional Laboratory, National Infection Service	Wellcome Sanger Institute for the COVID-19 Genomics UK (COG-UK) consortium	Stephanie Hutchings et al
EPI_ISL_831039,EPI_ISL_831040,EPI_ISL_831041,EPI_ISL_831042,EPI_ISL_831043,EPI_ISL_831044,EPI_ISL_831045,EPI_ISL_831046,EPI_ISL_831047,EPI_ISL_831048,EPI_ISL_831049,EPI_ISL_831050,EPI_ISL_831051,EPI_ISL_831052,EPI_ISL_831053,EPI_ISL_831036,EPI_ISL_831054,EPI_ISL_831055,EPI_ISL_831056,EPI_ISL_831057,EPI_ISL_831058,EPI_ISL_831059,EPI_ISL_831060,EPI_ISL_831061,EPI_ISL_831062,EPI_ISL_831063,EPI_ISL_8…	Hospital Universitario La Paz (Madrid)	SeqCOVID-SPAIN consortium/IBV(CSIC)	María Rodríguez-Tejedor et al
EPI_ISL_424345,EPI_ISL_424348,EPI_ISL_424626,EPI_ISL_424627	Instituto Nacional de Enfermedades Respiratorias	Instituto Nacional de Enfermedades Respiratorias	Joel Armando Vázquez Pérez et al
EPI_ISL_1128118,EPI_ISL_1128119,EPI_ISL_1138883,EPI_ISL_1128120,EPI_ISL_1138884,EPI_ISL_1138885,EPI_ISL_1128121,EPI_ISL_1128122,EPI_ISL_1138886,EPI_ISL_1128125,EPI_ISL_1128126,EPI_ISL_1128127,EPI_ISL_1128128,EPI_ISL_1128129	Jessa	Jessa	Cruys et al. on behalf of the Jessa_cmdLab et al
EPI_ISL_498226	LIC	LIC	LIC et al
EPI_ISL_416479,EPI_ISL_416477,EPI_ISL_416478	R. G. Lugar Center for Public Health Research, National Center for Disease Control and Public Health (NCDC) of Georgia.	R. G. Lugar Center for Public Health Research, National Center for Disease Control and Public Health (NCDC) of Georgia.	Marine Murtskhvaladze et al
EPI_ISL_451157,EPI_ISL_469033	Government Medical College, Vadodara	Gujarat Biotechnology Research Centre	Nidhi Patel et al
EPI_ISL_909963,EPI_ISL_891249,EPI_ISL_891250,EPI_ISL_909953,EPI_ISL_910011,EPI_ISL_910012,EPI_ISL_910013,EPI_ISL_910015	AZ Delta	AZ Delta	Geert Martens et al
EPI_ISL_960115	Plettenberg Bay Clinic wc PLC	National Health Laboratory Service/UCT	Arash Iranzadeh et al
EPI_ISL_437628,EPI_ISL_437629,EPI_ISL_437630,EPI_ISL_437631,EPI_ISL_437632,EPI_ISL_437633,EPI_ISL_437634,EPI_ISL_437635,EPI_ISL_436962,EPI_ISL_437636,EPI_ISL_437637,EPI_ISL_444817,EPI_ISL_444818,EPI_ISL_444819,EPI_ISL_444820,EPI_ISL_444822,EPI_ISL_444823,EPI_ISL_444824,EPI_ISL_444825,EPI_ISL_444826,EPI_ISL_444827,EPI_ISL_444828,EPI_ISL_444829,EPI_ISL_444830,EPI_ISL_444831,EPI_ISL_444832,EPI_ISL_4…	Department of Virus and Microbiological Special Diagnostics, Statens Serum Institut, Copenhagen, Denmark, Artillerivej 5, 2300 Copenahgen S	Albertsen lab, Department of Chemistry and Bioscience, Aalborg University, Denmark	Rasmus Kirkegaard et al
EPI_ISL_476145,EPI_ISL_476146,EPI_ISL_476147,EPI_ISL_475124	Ostersund klinisk mikrobiologi	The Public Health Agency of Sweden	Oskar Karlsson Lindsjo et al
EPI_ISL_833039	RS TK II 02.05.01 dr. AK Gani Palembang	National Institute of Health Research and Development	Subangkit et al
EPI_ISL_437453	B.J. Medical College and Civil hospital	Gujarat Biotechnology Research Centre	Nidhi Sood et al
EPI_ISL_934652,EPI_ISL_934653,EPI_ISL_934654	Klinikum Wels-Grieskirchen	Bergthaler laboratory, CeMM Research Center for Molecular Medicine of the Austrian Academy of Sciences	Lukas Endler et al
EPI_ISL_414495	Servicio Microbiología. Hospital Clínico Universitario. Valencia.	Sequencing and Bioinformatics Service. Molecular Epidemiology Laboratory. FISABIO-Public Health	David Navarro et al
EPI_ISL_412912	State Health Office Baden-Württemberg	Charité Universitätsmedizin Berlin, Institute of Virology	Victor M Corman et al
EPI_ISL_632312	NU-sjukvården	Clinical microbiology, Sahlgrenska University Hospital	Johan Ringlander et al
EPI_ISL_806537,EPI_ISL_753745,EPI_ISL_754185,EPI_ISL_753719,EPI_ISL_753770,EPI_ISL_753766,EPI_ISL_753813,EPI_ISL_753814,EPI_ISL_753722,EPI_ISL_753843,EPI_ISL_753844,EPI_ISL_753845,EPI_ISL_753846,EPI_ISL_753847,EPI_ISL_753848,EPI_ISL_753849,EPI_ISL_753774,EPI_ISL_753850,EPI_ISL_753718,EPI_ISL_753851,EPI_ISL_753852,EPI_ISL_753853,EPI_ISL_753854,EPI_ISL_753855,EPI_ISL_753856,EPI_ISL_753857,EPI_ISL_7…	Charité Universitätsmedizin Berlin, Institut für Virologie/Labor Berlin	Charité Universitätsmedizin Berlin, Institut für Virologie	Victor M Corman et al
EPI_ISL_778867	Synergy Laboratories	Synergy Laboratories	Megan Cornwell et al
EPI_ISL_447584,EPI_ISL_447585,EPI_ISL_447586,EPI_ISL_447587	Tamil Nadu Veterinary and Animal Sciences University	CSIR-Centre for Cellular and Molecular Biology	K Kaveri et al
EPI_ISL_861135,EPI_ISL_861136,EPI_ISL_861137,EPI_ISL_861138,EPI_ISL_861139,EPI_ISL_861140,EPI_ISL_861141,EPI_ISL_861142,EPI_ISL_861143,EPI_ISL_936046,EPI_ISL_936047,EPI_ISL_936048,EPI_ISL_936049,EPI_ISL_936050,EPI_ISL_936051,EPI_ISL_936052,EPI_ISL_936053,EPI_ISL_936054,EPI_ISL_936055,EPI_ISL_936056,EPI_ISL_936057,EPI_ISL_936058,EPI_ISL_936059,EPI_ISL_982499,EPI_ISL_982500,EPI_ISL_982501,EPI_ISL_9…	ADIRONDACK MEDICAL CENTER	Wadsworth Center, New York State Department of Health	Kirsten St. George et al
EPI_ISL_450873,EPI_ISL_450874	Evandro Chagas Institute	Evandro Chagas Institute	Santos et al
EPI_ISL_825057	GMERS Medical College and Hospital, Gotri, Vadodara	Gujarat Biotechnology Research Centre	Dinesh Kumar et al
EPI_ISL_516783,EPI_ISL_516784,EPI_ISL_516785,EPI_ISL_522439,EPI_ISL_522440,EPI_ISL_522441,EPI_ISL_522442,EPI_ISL_522443,EPI_ISL_522444,EPI_ISL_522445,EPI_ISL_522446,EPI_ISL_522447,EPI_ISL_522448,EPI_ISL_522449,EPI_ISL_522450,EPI_ISL_522451,EPI_ISL_522452,EPI_ISL_522453,EPI_ISL_522455,EPI_ISL_522456,EPI_ISL_522457,EPI_ISL_522458,EPI_ISL_522459,EPI_ISL_522460,EPI_ISL_522461,EPI_ISL_522462,EPI_ISL_5…	Center for Laboratory Control of Infectious Diseases, Korea Centers for Diseases Control and Prevention	Center for Laboratory Control of Infectious Diseases, Korea Centers for Diseases Control and Prevention	Junyoung Kim et al
EPI_ISL_524761	GMERS Medical College and Hospital, Dharpur, Patan	Gujarat Biotechnology Research Centre	Labdhi Pandya et al
EPI_ISL_751288,EPI_ISL_751277,EPI_ISL_751289,EPI_ISL_751296,EPI_ISL_751297,EPI_ISL_751298,EPI_ISL_751299,EPI_ISL_751317,EPI_ISL_751300,EPI_ISL_751301,EPI_ISL_751302,EPI_ISL_751303,EPI_ISL_751278,EPI_ISL_751290,EPI_ISL_751243,EPI_ISL_751291,EPI_ISL_751241,EPI_ISL_751292,EPI_ISL_751279,EPI_ISL_751280,EPI_ISL_751304,EPI_ISL_751315,EPI_ISL_751305,EPI_ISL_751281,EPI_ISL_751306,EPI_ISL_751242,EPI_ISL_7…	Devki Devi Foundation, a unit of Max Healthcare	CSIR-IGIB/Max	Rajesh Pandey# et al
EPI_ISL_481013,EPI_ISL_480962,EPI_ISL_480979,EPI_ISL_481027,EPI_ISL_481009,EPI_ISL_481001,EPI_ISL_481024,EPI_ISL_480982,EPI_ISL_480964,EPI_ISL_481010,EPI_ISL_481020,EPI_ISL_480972,EPI_ISL_481026,EPI_ISL_481000,EPI_ISL_480960,EPI_ISL_480952,EPI_ISL_481016,EPI_ISL_481036,EPI_ISL_481007,EPI_ISL_481015,EPI_ISL_481005,EPI_ISL_480980,EPI_ISL_480974,EPI_ISL_481030,EPI_ISL_480969,EPI_ISL_480959,EPI_ISL_4…	Servicio de Microbiología. Hospital Universitario Donostia. OSI Donostialdea. Área de Enfermedades Infecciosas, Grupo de Infección Respiratoria y Resistencia Antimicrobiana. Instituto de Investigación Sanitaria Biodonostia	SeqCOVID-SPAIN consortium/IBV(CSIC)	Gustavo Cilla et al
EPI_ISL_831993,EPI_ISL_775593,EPI_ISL_831994,EPI_ISL_831995,EPI_ISL_766724	TATAA Biocenter	The Public Health Agency of Sweden	Department of Microbiology et al
EPI_ISL_581506,EPI_ISL_581505,EPI_ISL_581507	NCDC/IGIB	NCDC/IGIB	Vivekanand A et al
EPI_ISL_582509	Department of Respiratory and other Viral Infections of L.V.Gromashevsky Institute of Epidemiology & Infectious Diseases NAMS of Ukraine	Department of Respiratory and other Viral Infections of L.V.Gromashevsky Institute of Epidemiology & Infectious Diseases NAMS of Ukraine, JSC "Farmak"	Alla Mironenko et al
EPI_ISL_970469	EHNV	Laboratory of genomics and metagenomics, Institute of Microbiology, University Hospital Centre and University of Lausanne, Switzerland	Trestan Pillonel et al
EPI_ISL_407987	Singapore General Hospital	Programme in Emerging Infectious Diseases, Duke-NUS Medical School	Danielle E Anderson et al
EPI_ISL_779836,EPI_ISL_768817	Laboratoire Mirialis	CNR Virus des Infections Respiratoires - France SUD	Antonin Bal et al
EPI_ISL_696472,EPI_ISL_696509,EPI_ISL_696512,EPI_ISL_696508,EPI_ISL_696492	Conville CDC wc CVC & NHLS/UCT	KRISP, KZN Research Innovation and Sequencing Platform	Arash Iranzadeh et al
EPI_ISL_890186,EPI_ISL_890187,EPI_ISL_890185,EPI_ISL_911709,EPI_ISL_911707,EPI_ISL_905731,EPI_ISL_891151	Academic Hospital of Gadjah Mada University (RSA UGM)	Genetics Working Group (Pokja Genetik) Faculty of Medicine, Public Health and Nursing Universitas Gadjah Mada (FK-KMK UGM); Disease Investigation Center Wates Ministry of Agriculture Indonesia; Department of Microbiology FK-KMK UGM; Laboratorium Diagnostik Yayasan Tahija World Mosquito Program (WMP) Yogyakarta Center for Tropical Medicine FK-KMK UGM; Integrated Research center FK-KMK UGM; Departm…	Gunadi et al
EPI_ISL_751732,EPI_ISL_751734,EPI_ISL_751638,EPI_ISL_751583,EPI_ISL_751585,EPI_ISL_751608,EPI_ISL_751681,EPI_ISL_751563,EPI_ISL_903774,EPI_ISL_903901,EPI_ISL_903791,EPI_ISL_903747,EPI_ISL_903885,EPI_ISL_903817,EPI_ISL_903845	NE Public Health Laboratory	Genomics and Discovery, Respiratory Viruses Branch, Division of Viral Diseases, Centers for Disease Control and Prevention	Krista Queen et al
EPI_ISL_660165,EPI_ISL_660166,EPI_ISL_660167,EPI_ISL_660168,EPI_ISL_660169,EPI_ISL_660170,EPI_ISL_660171,EPI_ISL_660172,EPI_ISL_660173,EPI_ISL_660174,EPI_ISL_660175,EPI_ISL_660176,EPI_ISL_660178,EPI_ISL_660180,EPI_ISL_660181,EPI_ISL_660182,EPI_ISL_660183,EPI_ISL_660184,EPI_ISL_660185	NHLS-IALCH	KRISP, KZN Research Innovation and Sequencing Platform	Gazy I et al
EPI_ISL_860553,EPI_ISL_860631	Ampath-Netcare	KRISP, KZn Research Innovation and Sequencing Platform	Giandhari J et al
EPI_ISL_527870,EPI_ISL_603029,EPI_ISL_603039,EPI_ISL_574578	Hospital Municipal Mário Gatti	Instituto Adolfo Lutz, Interdiciplinary Procedures Center, Strategic Laboratory	Claudio Tavares Sacchi et al
EPI_ISL_491123,EPI_ISL_491129,EPI_ISL_491121,EPI_ISL_491128,EPI_ISL_525424,EPI_ISL_491130,EPI_ISL_491131,EPI_ISL_491125,EPI_ISL_491126,EPI_ISL_491127,EPI_ISL_491132,EPI_ISL_491124,EPI_ISL_491122,EPI_ISL_525425,EPI_ISL_491116,EPI_ISL_525429	Oman-National Influenza Center	Biotechnology & OMICs Laboratory	Samira Al-Mahruqi et al
EPI_ISL_512665	Hospital De Las Mujeres Dr. Adolfo Carit	Inciensa, Instituto Costarricense de Investigación y Enseñanza en Nutrición y Salud	Francisco Duarte et al
EPI_ISL_591492,EPI_ISL_593654,EPI_ISL_699643,EPI_ISL_767882,EPI_ISL_767883,EPI_ISL_806725,EPI_ISL_845802,EPI_ISL_845803,EPI_ISL_845804,EPI_ISL_857309,EPI_ISL_451534,EPI_ISL_451553,EPI_ISL_451554,EPI_ISL_451555,EPI_ISL_451558,EPI_ISL_451567,EPI_ISL_451583,EPI_ISL_451597,EPI_ISL_451610,EPI_ISL_513341,EPI_ISL_526192	Medlab Pathology	NSW Health Pathology - Institute of Clinical Pathology and Medical Research; Westmead Hospital; University of Sydney	CIDM-PH et al. et al
EPI_ISL_412982	Wuhan Lung Hospital	Hubei Provincial Center for Disease Control and Prevention	Bin Fang et al
EPI_ISL_754177,EPI_ISL_753701	Specialized Lab for COVID-19 Detection, Department of Genetic Engineering and Biotechnology	Specialized Lab for COVID-19 Detection, Department of Genetic Engineering and Biotechnology	Nurnabi Azad Jewel et al
EPI_ISL_450341,EPI_ISL_450343,EPI_ISL_450345	Bangladesh Institute of Tropical & Infectious Diseases, COVID-19 Testing Laboratory	Basic and Applied Research on Jute Project	Md. Sabbir Hossain et al
EPI_ISL_977479	Lab Loc - Itapecerica da Serra	Instituto Adolfo Lutz, Interdiciplinary Procedures Center, Strategic Laboratory	Claudio Tavares Sacchi et al
EPI_ISL_654882,EPI_ISL_654881	Pasteur Institute in Ho Chi Minh city	Department of Microbiology and Immunology - Pasteur Institute in Ho Chi Minh city	Lương Chấn Quang et al
EPI_ISL_682261	TAMIZAJE COMUNITARIO- PASO CANOAS	Inciensa, Instituto Costarricense de Investigación y Enseñanza en Nutrición y Salud	Francisco Duarte et al
EPI_ISL_918428	Isar-Amper-Klinikum Haar	Bundeswehr Institute of Microbiology	Markus Antwerpen et al
EPI_ISL_750175	CENUR Este-Sede Rocha-UdelaR	Institut Pasteur de Montevideo	Daiana Mir et al
EPI_ISL_792000,EPI_ISL_792001,EPI_ISL_792002,EPI_ISL_754845,EPI_ISL_754843,EPI_ISL_754844,EPI_ISL_792004,EPI_ISL_792005,EPI_ISL_754849,EPI_ISL_754846,EPI_ISL_754850,EPI_ISL_792006,EPI_ISL_792007,EPI_ISL_754851,EPI_ISL_754852	Laboratoire de Virologie Hôpital Robert Debré	National Reference Center for Viruses of Respiratory Infections, Institut Pasteur, Paris	Marion Barbet et al
EPI_ISL_492075,EPI_ISL_492076,EPI_ISL_492077,EPI_ISL_492078,EPI_ISL_492079,EPI_ISL_492080,EPI_ISL_492081,EPI_ISL_492082,EPI_ISL_492083,EPI_ISL_492084,EPI_ISL_492085,EPI_ISL_492086	Institute for Public Health of the Republic of North Macedonia	Charite Universitatsmedizin Berlin, Institute of Virology	Victor M Corman et al
EPI_ISL_636982,EPI_ISL_636983,EPI_ISL_636984,EPI_ISL_636985,EPI_ISL_636986,EPI_ISL_636988	Virology Lab, National Institute for Biomedical Research (INRB)	Project group Epidemology of Highly Pathogenic Microorganisms, Robert Koch-Institute	Jean-Jacques Muyembe Tamfum et al
EPI_ISL_586546	General Hospital,Godhra	Gujarat Biotechnology Research Centre	Neela Katara et al
EPI_ISL_482759,EPI_ISL_482760,EPI_ISL_482761,EPI_ISL_483035,EPI_ISL_482762,EPI_ISL_482763,EPI_ISL_482764,EPI_ISL_482765,EPI_ISL_482766,EPI_ISL_482767,EPI_ISL_483036,EPI_ISL_483037,EPI_ISL_482768,EPI_ISL_482769,EPI_ISL_482770,EPI_ISL_482771,EPI_ISL_482772,EPI_ISL_482773,EPI_ISL_483038,EPI_ISL_482774,EPI_ISL_482775,EPI_ISL_475752,EPI_ISL_475753,EPI_ISL_475748,EPI_ISL_475749,EPI_ISL_475750,EPI_ISL_4…	Medical Ain Shams Research Institute (MASRI), Ain Shams University	Medical Ain Shams Research Institute (MASRI), Ain Shams University	Hesham Elghazaly et al
EPI_ISL_889328,EPI_ISL_889329,EPI_ISL_889330	Bioptická laboratoř s.r.o.	Institute of Applied Biotechnologies a.s.	Petr Klempt et al
EPI_ISL_696521	Thembalethu CDC wc THC & NHLS/UC	KRISP, KZN Research Innovation and Sequencing Platform	Arash Iranzadeh et al
EPI_ISL_524724,EPI_ISL_586520,EPI_ISL_514585,EPI_ISL_514603	B.J. Medical College and Civil hospital, Ahmedabad	Gujarat Biotechnology Research Centre	Komal Patel et al
EPI_ISL_445279	LABORATORIO INMUNOLAB SPA	Instituto de Salud Publica de Chile	Andrés E Castillo et al
EPI_ISL_860913,EPI_ISL_860914,EPI_ISL_860915,EPI_ISL_860916,EPI_ISL_860917,EPI_ISL_860918,EPI_ISL_860868,EPI_ISL_860919,EPI_ISL_860920,EPI_ISL_860890,EPI_ISL_860921,EPI_ISL_860922,EPI_ISL_860923,EPI_ISL_860924,EPI_ISL_860865,EPI_ISL_860925,EPI_ISL_860926,EPI_ISL_860927,EPI_ISL_860928,EPI_ISL_860929,EPI_ISL_860930,EPI_ISL_860863,EPI_ISL_860821,EPI_ISL_860828	CHU de Nantes - Hôtel Dieu - Labo. Virologie	National Reference Center for Viruses of Respiratory Infections, Institut Pasteur, Paris	Marion Barbet et al
EPI_ISL_538500,EPI_ISL_538501	RS Prima Husada Cipta Medan North Sumatra	National Institute of Health Research and Development	Pawestri et al
EPI_ISL_445291,EPI_ISL_445292,EPI_ISL_445299,EPI_ISL_445282,EPI_ISL_445283,EPI_ISL_445290	CLINICA MAGALLANES S.A.	Instituto de Salud Publica de Chile	Andrés E Castillo et al
EPI_ISL_871973,EPI_ISL_871991,EPI_ISL_871984,EPI_ISL_691729,EPI_ISL_691730	Hospital Universitario Severo Ochoa	Instituto de Salud Carlos III	Iglesias-Caballero et al
EPI_ISL_766041	RS Polri	Eijkman Institute for Molecular Biology, Ministry of Research and Technology/National Agency for Research and Innovation	Frilasita A Yudhaputri et al
EPI_ISL_602533,EPI_ISL_717976,EPI_ISL_602534,EPI_ISL_602535,EPI_ISL_602536,EPI_ISL_602537,EPI_ISL_602538,EPI_ISL_602539,EPI_ISL_602540,EPI_ISL_602541,EPI_ISL_602543,EPI_ISL_602544,EPI_ISL_602545,EPI_ISL_602547,EPI_ISL_602549,EPI_ISL_602550,EPI_ISL_602551,EPI_ISL_602552,EPI_ISL_602510,EPI_ISL_602511,EPI_ISL_602512,EPI_ISL_602513,EPI_ISL_602514,EPI_ISL_602515,EPI_ISL_602516,EPI_ISL_602517,EPI_ISL_7…	Center of Medical Microbiology, Virology, and Hospital Hygiene, University of Duesseldorf	Center of Medical Microbiology, Virology, and Hospital Hygiene, University of Duesseldorf	Maximilian Damagnez et al
EPI_ISL_803871,EPI_ISL_803874,EPI_ISL_803875,EPI_ISL_864544,EPI_ISL_864545,EPI_ISL_864546,EPI_ISL_864563,EPI_ISL_864564,EPI_ISL_864565,EPI_ISL_864566,EPI_ISL_864567,EPI_ISL_864568,EPI_ISL_864569,EPI_ISL_864570,EPI_ISL_864571,EPI_ISL_864572,EPI_ISL_864573,EPI_ISL_864574,EPI_ISL_864575,EPI_ISL_864576,EPI_ISL_864577,EPI_ISL_864578,EPI_ISL_864579,EPI_ISL_894161,EPI_ISL_884281,EPI_ISL_894164,EPI_ISL_8…	Institute of Medical Microbiology and Hospital Hygiene	Institute of Medical Microbiology and Hospital Hygiene	Prof. Dr. Achim Kaasch et al
EPI_ISL_728156,EPI_ISL_728159,EPI_ISL_718273,EPI_ISL_727998,EPI_ISL_727999,EPI_ISL_728153,EPI_ISL_728154,EPI_ISL_728155	Fujita Health University Okazaki Medical Center	Department of Virology and Parasitology, Fujita Health University School of Medicine	Takayuki Murata et al
EPI_ISL_417935,EPI_ISL_417937,EPI_ISL_417938,EPI_ISL_417939,EPI_ISL_417931,EPI_ISL_417932,EPI_ISL_417933	UCSF Clinical Microbiology Laboratory	Chan-Zuckerberg Biohub	Shaun Arevalo et al
EPI_ISL_640075	Bothasig CDC wc BLD	NHLS/UCT	Arash Iranzadeh et al
EPI_ISL_517613,EPI_ISL_517615,EPI_ISL_517616,EPI_ISL_517617,EPI_ISL_517618,EPI_ISL_517620,EPI_ISL_517621,EPI_ISL_517622,EPI_ISL_517623,EPI_ISL_517624,EPI_ISL_517625,EPI_ISL_517626,EPI_ISL_517627,EPI_ISL_517628,EPI_ISL_517629,EPI_ISL_517630,EPI_ISL_517631,EPI_ISL_517632,EPI_ISL_517633,EPI_ISL_517636,EPI_ISL_517637,EPI_ISL_517638,EPI_ISL_517639,EPI_ISL_517640,EPI_ISL_517641,EPI_ISL_517643,EPI_ISL_5…	Academic Hospital Paramaribo	Erasmus Medical Center	Bas Oude Munnink et al
EPI_ISL_848069	Tulane Medical Center	Centers for Disease Control and Prevention Division of Viral Diseases, Pathogen Discovery	Ying Tao et al
EPI_ISL_882769	Institute of Tropical Disease	Institute of Tropical Disease, Universitas Airlangga	Kazufumi Shimizu et al
EPI_ISL_806730	Presidio Ospedaliero S.Liberatore Atri	Istituto Zooprofilattico Sperimentale dell’Abruzzo e Molise “G. Caporale”	Lorusso A et al
EPI_ISL_445088	Human Genetic Research Center, Kawsar Biotech Company	Human Genetic Research Center, Kawsar Biotech Company	Abbasalipour Bashash et al
EPI_ISL_918513	LACEN - Laboratório Central de Saúde Pública do Roraima	﻿Evandro Chagas Institute	Santos et al
EPI_ISL_693471,EPI_ISL_693480,EPI_ISL_693481,EPI_ISL_693482,EPI_ISL_693483,EPI_ISL_693472,EPI_ISL_693473,EPI_ISL_693474,EPI_ISL_693475,EPI_ISL_693476,EPI_ISL_693477,EPI_ISL_693478,EPI_ISL_693479	Central Public Health Laboratory	National Public Health Laboratory, National Centre for Infectious Diseases	Tze Minn Mak et al
EPI_ISL_428355,EPI_ISL_428356,EPI_ISL_428357	Institut Médico légal- Hop R. Poincaré	National Reference Center for Viruses of Respiratory Infections, Institut Pasteur, Paris	Mélanie Albert et al
EPI_ISL_582769,EPI_ISL_582692,EPI_ISL_582802,EPI_ISL_582810,EPI_ISL_582811,EPI_ISL_582833,EPI_ISL_582767,EPI_ISL_582693,EPI_ISL_582770,EPI_ISL_582694,EPI_ISL_582768,EPI_ISL_582846,EPI_ISL_582845,EPI_ISL_582849,EPI_ISL_582850,EPI_ISL_582842,EPI_ISL_582848,EPI_ISL_582847	Laboratorio di Riferimento Regionale della Sicilia Occidentale per l'Emergenza COVID-19	Istituto Zooprofilattico Sperimentale della Sicilia	Tramuto Fabio et al
EPI_ISL_427043	Laboratory of Microbiology, Medical School, National and Kapodistrian University of Athens	Laboratory of Biology, Department of Medicine, Democritus University of Thrace	Bampali et al
EPI_ISL_538233,EPI_ISL_538234,EPI_ISL_538235,EPI_ISL_538236,EPI_ISL_538239,EPI_ISL_538241,EPI_ISL_538242,EPI_ISL_538243,EPI_ISL_538245,EPI_ISL_538247,EPI_ISL_538248,EPI_ISL_538249,EPI_ISL_538264,EPI_ISL_542935,EPI_ISL_542937,EPI_ISL_542940,EPI_ISL_542941,EPI_ISL_542942,EPI_ISL_542943,EPI_ISL_542945,EPI_ISL_542948,EPI_ISL_542949,EPI_ISL_542950,EPI_ISL_542951,EPI_ISL_542952,EPI_ISL_542955,EPI_ISL_5…	TriCore Reference Laboratories	Center for Global Health, University of New Mexico Health Sciences Center	Daryl Domman et al
EPI_ISL_452106,EPI_ISL_452107,EPI_ISL_424868	LA Office of Public Health Laboratories	Pathogen Discovery, Respiratory Viruses Branch, Division of Viral Diseases, Centers for Disease Control and Prevention	Yan Li et al
EPI_ISL_527872,EPI_ISL_729951,EPI_ISL_729952,EPI_ISL_729953,EPI_ISL_729954,EPI_ISL_729955,EPI_ISL_729956,EPI_ISL_729957,EPI_ISL_729958,EPI_ISL_729986,EPI_ISL_729987,EPI_ISL_729988,EPI_ISL_729989,EPI_ISL_729990,EPI_ISL_729991,EPI_ISL_729992,EPI_ISL_729993,EPI_ISL_729994,EPI_ISL_729928,EPI_ISL_730017,EPI_ISL_729959,EPI_ISL_729960,EPI_ISL_729961,EPI_ISL_729962,EPI_ISL_729963,EPI_ISL_729964,EPI_ISL_7…	Nigeria Centre for Disease Control (NCDC)	African Centre of Excellence for Genomics of Infectious Diseases (ACEGID), Redeemer's University, Ede, Osun State, Nigeria	Oluniyi P.E. et al et al
EPI_ISL_890188,EPI_ISL_890192,EPI_ISL_890193,EPI_ISL_890194,EPI_ISL_890189,EPI_ISL_890190,EPI_ISL_890191	Gonoshasthaya-RNA Research Center, Gonoshasthaya-RNA Molecular Diagnostics and Research Center	Gonoshasthaya-RNA Research Center, Gonoshasthaya-RNA Molecular Diagnostics and Research Center	Jamiruddin et al
EPI_ISL_635778,EPI_ISL_635781,EPI_ISL_635782,EPI_ISL_636267,EPI_ISL_636269,EPI_ISL_636270,EPI_ISL_636271,EPI_ISL_636272,EPI_ISL_636273,EPI_ISL_636274,EPI_ISL_636275,EPI_ISL_636276,EPI_ISL_636277,EPI_ISL_636278,EPI_ISL_636279,EPI_ISL_636280,EPI_ISL_636281,EPI_ISL_636282,EPI_ISL_636284,EPI_ISL_636285,EPI_ISL_636286,EPI_ISL_636287,EPI_ISL_636288,EPI_ISL_636289,EPI_ISL_636290,EPI_ISL_636291,EPI_ISL_6…	Biolab Diagnostic Laboratories	Andersen lab at Scripps Research	Issa Abu-Dayyeh et al
EPI_ISL_956332,EPI_ISL_907075	Department of Biology, University of Basrah	Department of Biology, University of Basrah	Abu-Ali et al
EPI_ISL_976900,EPI_ISL_976901,EPI_ISL_976904,EPI_ISL_937534,EPI_ISL_976902,EPI_ISL_918163,EPI_ISL_937531,EPI_ISL_976903,EPI_ISL_976905,EPI_ISL_937535,EPI_ISL_937532,EPI_ISL_976906,EPI_ISL_937536,EPI_ISL_937538,EPI_ISL_937537,EPI_ISL_937533,EPI_ISL_976908,EPI_ISL_976909,EPI_ISL_976899,EPI_ISL_976893,EPI_ISL_918161,EPI_ISL_976894,EPI_ISL_937542,EPI_ISL_937541,EPI_ISL_937539,EPI_ISL_937540,EPI_ISL_9…	Thai Red Cross Emerging Infectious Diseases Health Science Centre, Chulalongkorn Hospital, Faculty of Medicine, Chulalongkorn University	Thai Red Cross Emerging Infectious Diseases Center and Faculty of Medicine, Chulalongkorn University	Opass Putcharoen et al
EPI_ISL_640041	Green Point CDC wc GPH	NHLS/UCT	Arash Iranzadeh et al
EPI_ISL_940777	NSPI-CRN de Influenza y otros virus respiratorios	INSPI-Centro de Investigación Multidisciplinaria de la DTIDI	Leandro Patiño et al
EPI_ISL_451601,EPI_ISL_455051,EPI_ISL_455052,EPI_ISL_455053,EPI_ISL_455065	Douglas Hanly Moir Pathology	NSW Health Pathology - Institute of Clinical Pathology and Medical Research; Westmead Hospital; University of Sydney	CIDM-PH et al. et al
EPI_ISL_631514,EPI_ISL_632055,EPI_ISL_632056	New York Community Hospital	New York City Public Health Laboratory	Jade Wang et al
EPI_ISL_962442	Evergreen Healthcare	Seattle Flu Study	Deborah A. Nickerson et al
EPI_ISL_426435	RI State Health Laboratories	Pathogen Discovery, Respiratory Viruses Branch, Division of Viral Diseases, Centers for Disease Control and Prevention	Krista Queen et al
EPI_ISL_860789,EPI_ISL_860790,EPI_ISL_824942,EPI_ISL_824944,EPI_ISL_875344,EPI_ISL_856681,EPI_ISL_824943,EPI_ISL_848200,EPI_ISL_848201,EPI_ISL_848202,EPI_ISL_860786,EPI_ISL_856678,EPI_ISL_824921,EPI_ISL_856680,EPI_ISL_868949,EPI_ISL_824985,EPI_ISL_824986,EPI_ISL_860761,EPI_ISL_824920,EPI_ISL_860784,EPI_ISL_860787,EPI_ISL_860788,EPI_ISL_860785,EPI_ISL_856683	Charité Universitätsmedizin Berlin, Institute of Virology, Charitéplatz 1, 10117 Berlin, Germany	Charité Universitätsmedizin Berlin, Institute of Virology, Charitéplatz 1, 10117 Berlin, Germany	Victor M Corman et al
EPI_ISL_483855,EPI_ISL_483873	Department of Microbiology, Government Medical College, Surat	Gujarat Biotechnology Research Centre	Labdhi Pandya et al
EPI_ISL_631748,EPI_ISL_631749,EPI_ISL_631750,EPI_ISL_631751,EPI_ISL_631778,EPI_ISL_631779,EPI_ISL_631780,EPI_ISL_631781,EPI_ISL_631782,EPI_ISL_631783,EPI_ISL_631784,EPI_ISL_631856,EPI_ISL_631857,EPI_ISL_631858,EPI_ISL_631859,EPI_ISL_631888,EPI_ISL_631900,EPI_ISL_631911,EPI_ISL_631912,EPI_ISL_631917,EPI_ISL_631924,EPI_ISL_631933,EPI_ISL_631935,EPI_ISL_631939,EPI_ISL_631940,EPI_ISL_631941,EPI_ISL_6…	St Barnabas Hospital	New York City Public Health Laboratory	Jade Wang et al
EPI_ISL_770016,EPI_ISL_770020	Area De Salud Goicoechea 2 - Clinica Dr. Jimenez Nuñez	Inciensa, Instituto Costarricense de Investigación y Enseñanza en Nutrición y Salud	Francisco Duarte et al
EPI_ISL_467436,EPI_ISL_467437,EPI_ISL_467438,EPI_ISL_467439,EPI_ISL_467440,EPI_ISL_467441,EPI_ISL_467442,EPI_ISL_467443,EPI_ISL_467493,EPI_ISL_467507,EPI_ISL_467508,EPI_ISL_467509,EPI_ISL_467510,EPI_ISL_467511,EPI_ISL_467512,EPI_ISL_467513,EPI_ISL_467514,EPI_ISL_467515,EPI_ISL_467517,EPI_ISL_467518,EPI_ISL_467519,EPI_ISL_467520,EPI_ISL_467521,EPI_ISL_467522,EPI_ISL_467523,EPI_ISL_467524,EPI_ISL_4…	NHLS-IALCH	KRISP, KZN Research Innovation and Sequencing Platform	Giandhari J et al
EPI_ISL_602722,EPI_ISL_602723,EPI_ISL_602724,EPI_ISL_602725,EPI_ISL_602726,EPI_ISL_602727,EPI_ISL_602728,EPI_ISL_602729,EPI_ISL_602730,EPI_ISL_602731,EPI_ISL_602732,EPI_ISL_602733,EPI_ISL_602734,EPI_ISL_602735,EPI_ISL_602736,EPI_ISL_602737,EPI_ISL_602738,EPI_ISL_602739,EPI_ISL_602740,EPI_ISL_602741,EPI_ISL_602742,EPI_ISL_602743,EPI_ISL_602744,EPI_ISL_602745,EPI_ISL_602746,EPI_ISL_602747,EPI_ISL_6…	NHLS-IALCH	KRISP, KZN Research Innovation and Sequencing Platform	Giandhari J et al
EPI_ISL_537288,EPI_ISL_537289,EPI_ISL_537290,EPI_ISL_537291,EPI_ISL_537292,EPI_ISL_537293,EPI_ISL_537294,EPI_ISL_537295,EPI_ISL_537296,EPI_ISL_537297,EPI_ISL_537298,EPI_ISL_537299,EPI_ISL_537300,EPI_ISL_537301,EPI_ISL_537302,EPI_ISL_537303,EPI_ISL_537304,EPI_ISL_537305,EPI_ISL_537306,EPI_ISL_537307,EPI_ISL_537308,EPI_ISL_537309,EPI_ISL_537310,EPI_ISL_537311,EPI_ISL_537312,EPI_ISL_537313,EPI_ISL_5…	Universidad de León	SeqCOVID-SPAIN consortium/IBV(CSIC)	Ana Carvajal et al
EPI_ISL_710120,EPI_ISL_710121,EPI_ISL_710122,EPI_ISL_710123,EPI_ISL_710124,EPI_ISL_710125,EPI_ISL_710126,EPI_ISL_710127,EPI_ISL_710128	South Eastern Area Laboratory Services (SEALS)	CIDM-PH et al.	CIDM-PH et al. et al
EPI_ISL_632936	Puskesmas Mlati 1 Sleman	Genetics Working Group (Pokja Genetik) Faculty of Medicine, Public Health and Nursing Universitas Gadjah Mada (FK-KMK UGM); Disease Investigation Center Wates Ministry of Agriculture Indonesia; Department of Microbiology FK-KMK UGM; Laboratorium Diagnostik Yayasan Tahija World Mosquito Program (WMP) Yogyakarta Center for Tropical Medicine FK-KMK UGM; Integrated Research Center FK-KMK UGM; Departm…	Gunadi et al
EPI_ISL_752606,EPI_ISL_861734,EPI_ISL_861745,EPI_ISL_861736,EPI_ISL_912168	Yale Pathology Lab	Grubaugh Lab - Yale School of Public Health	Tara Alpert et al
EPI_ISL_884445,EPI_ISL_884446,EPI_ISL_884447,EPI_ISL_884448,EPI_ISL_884449,EPI_ISL_884450,EPI_ISL_884451,EPI_ISL_884452,EPI_ISL_884453,EPI_ISL_884454,EPI_ISL_884455,EPI_ISL_884456,EPI_ISL_884457,EPI_ISL_884458,EPI_ISL_884569,EPI_ISL_884579,EPI_ISL_884459,EPI_ISL_884460,EPI_ISL_884461,EPI_ISL_884462,EPI_ISL_884463,EPI_ISL_884464,EPI_ISL_884466,EPI_ISL_884468,EPI_ISL_884469,EPI_ISL_884470,EPI_ISL_8…	Molecular Microbiology & Immunology, University of Missouri	Molecular Microbiology & Immunology, University of Missouri	Tang et al
EPI_ISL_426416	CT-Dr. Katherine A. Kelley State Public Health Lab	Pathogen Discovery, Respiratory Viruses Branch, Division of Viral Diseases, Centers for Disease Control and Prevention	Anna Uehara et al
EPI_ISL_911190,EPI_ISL_910695,EPI_ISL_910988,EPI_ISL_910598,EPI_ISL_910635,EPI_ISL_910458,EPI_ISL_910853,EPI_ISL_910687,EPI_ISL_910893,EPI_ISL_910712,EPI_ISL_910968,EPI_ISL_911238,EPI_ISL_911150,EPI_ISL_910785,EPI_ISL_910361,EPI_ISL_911224,EPI_ISL_911117,EPI_ISL_910976,EPI_ISL_911143,EPI_ISL_911162,EPI_ISL_910431,EPI_ISL_911153,EPI_ISL_910555,EPI_ISL_910528,EPI_ISL_910970,EPI_ISL_911092,EPI_ISL_9…	Laboratoire national de sante, Microbiology, Virology	Laboratoire national de sante, Microbiology, Microbial Genomics Platform	Anke Wienecke-Baldacchino et al
EPI_ISL_603026,EPI_ISL_547580,EPI_ISL_603032,EPI_ISL_693219	Santa Casa da Misericórdia de Presidente Prudente	Instituto Adolfo Lutz, Interdiciplinary Procedures Center, Strategic Laboratory	Claudio Tavares Sacchi et al
EPI_ISL_925502,EPI_ISL_925503,EPI_ISL_925504,EPI_ISL_925505,EPI_ISL_925506,EPI_ISL_925507,EPI_ISL_925508	Microbiology and Virology Laboratory, "Policlinico Riuniti, Azienda Ospedaliero Universitaria, Foggia"	Microbiology and Virology Laboratory, "Policlinico Riuniti, Azienda Ospedaliero Universitaria, Foggia"	Fabio Arena et al
EPI_ISL_979453,EPI_ISL_979454,EPI_ISL_979456	University of Iowa Hospitals and Clinics	State Hygienic Laboratory at the University of Iowa	Valerie Reeb et al
EPI_ISL_559708,EPI_ISL_559716,EPI_ISL_559732,EPI_ISL_559736,EPI_ISL_559745,EPI_ISL_559713,EPI_ISL_559744,EPI_ISL_559704,EPI_ISL_559730,EPI_ISL_559741,EPI_ISL_559707,EPI_ISL_559751,EPI_ISL_559742,EPI_ISL_559705,EPI_ISL_559728,EPI_ISL_559748,EPI_ISL_559750,EPI_ISL_559749,EPI_ISL_559729,EPI_ISL_559723,EPI_ISL_559719,EPI_ISL_559712,EPI_ISL_559739,EPI_ISL_559737,EPI_ISL_559731,EPI_ISL_559726,EPI_ISL_5…	Lighthouse Lab in Milton Keynes	Wellcome Sanger Institute for the COVID-19 Genomics UK (COG-UK) consortium	The Lighthouse Lab in Milton Keynes et al
EPI_ISL_554643,EPI_ISL_554859,EPI_ISL_554629,EPI_ISL_554744,EPI_ISL_554770,EPI_ISL_554712,EPI_ISL_554687,EPI_ISL_554715,EPI_ISL_554658,EPI_ISL_554719,EPI_ISL_554678,EPI_ISL_554682,EPI_ISL_554720,EPI_ISL_554745,EPI_ISL_554645,EPI_ISL_554701,EPI_ISL_554702,EPI_ISL_554787,EPI_ISL_554705,EPI_ISL_554775,EPI_ISL_554752,EPI_ISL_554821,EPI_ISL_554801,EPI_ISL_554648,EPI_ISL_554749,EPI_ISL_554700,EPI_ISL_5…	Lighthouse Lab in Milton Keynes	Wellcome Sanger Institute for the COVID-19 Genomics UK (COG-UK) consortium	The Lighthouse Lab in Milton Keynes et al
EPI_ISL_552071,EPI_ISL_552169,EPI_ISL_552163,EPI_ISL_551963,EPI_ISL_552155,EPI_ISL_551995,EPI_ISL_552000,EPI_ISL_552074,EPI_ISL_552171,EPI_ISL_552070,EPI_ISL_552095,EPI_ISL_552104,EPI_ISL_551964,EPI_ISL_552018,EPI_ISL_552037,EPI_ISL_552016,EPI_ISL_552159,EPI_ISL_552038,EPI_ISL_552167,EPI_ISL_552072,EPI_ISL_551975,EPI_ISL_552048,EPI_ISL_552067,EPI_ISL_552054,EPI_ISL_552015,EPI_ISL_552109,EPI_ISL_5…	Lighthouse Lab in Milton Keynes	Wellcome Sanger Institute for the COVID-19 Genomics UK (COG-UK) consortium	The Lighthouse Lab in Milton Keynes et al
EPI_ISL_550085,EPI_ISL_550204,EPI_ISL_549972,EPI_ISL_550153,EPI_ISL_550088,EPI_ISL_550010,EPI_ISL_550239,EPI_ISL_550183,EPI_ISL_549963,EPI_ISL_550224,EPI_ISL_549983,EPI_ISL_550182,EPI_ISL_549951,EPI_ISL_550081,EPI_ISL_550115,EPI_ISL_550054,EPI_ISL_550059,EPI_ISL_550253,EPI_ISL_550097,EPI_ISL_549952,EPI_ISL_550210,EPI_ISL_549992,EPI_ISL_550202,EPI_ISL_550026,EPI_ISL_550176,EPI_ISL_550008,EPI_ISL_5…	Lighthouse Lab in Milton Keynes	Wellcome Sanger Institute for the COVID-19 Genomics UK (COG-UK) consortium	The Lighthouse Lab in Milton Keynes et al
EPI_ISL_566936,EPI_ISL_566727,EPI_ISL_566768,EPI_ISL_566904,EPI_ISL_566815,EPI_ISL_566753,EPI_ISL_566704,EPI_ISL_566972,EPI_ISL_566786,EPI_ISL_566945,EPI_ISL_566863,EPI_ISL_566750,EPI_ISL_566722,EPI_ISL_566762,EPI_ISL_566733,EPI_ISL_566834,EPI_ISL_566971,EPI_ISL_566758,EPI_ISL_566867,EPI_ISL_566898,EPI_ISL_566959,EPI_ISL_566716,EPI_ISL_566872,EPI_ISL_566950,EPI_ISL_566833,EPI_ISL_566903,EPI_ISL_5…	Lighthouse Lab in Milton Keynes	Wellcome Sanger Institute for the COVID-19 Genomics UK (COG-UK) consortium	The Lighthouse Lab in Milton Keynes et al
EPI_ISL_589169,EPI_ISL_589235,EPI_ISL_589225,EPI_ISL_589187,EPI_ISL_589221,EPI_ISL_589147,EPI_ISL_589029,EPI_ISL_589167,EPI_ISL_589034,EPI_ISL_589063,EPI_ISL_589019,EPI_ISL_589095,EPI_ISL_589256,EPI_ISL_589040,EPI_ISL_589168,EPI_ISL_589041,EPI_ISL_589074,EPI_ISL_589030,EPI_ISL_589091,EPI_ISL_589017,EPI_ISL_589075,EPI_ISL_589247,EPI_ISL_589101,EPI_ISL_589211,EPI_ISL_589195,EPI_ISL_589229,EPI_ISL_5…	Lighthouse Lab in Milton Keynes	Wellcome Sanger Institute for the COVID-19 Genomics UK (COG-UK) consortium	The Lighthouse Lab in Milton Keynes et al
EPI_ISL_608809,EPI_ISL_608706,EPI_ISL_608741,EPI_ISL_608785,EPI_ISL_608770,EPI_ISL_608721,EPI_ISL_608848,EPI_ISL_609001,EPI_ISL_608871,EPI_ISL_609071,EPI_ISL_608986,EPI_ISL_608861,EPI_ISL_609046,EPI_ISL_609137,EPI_ISL_608975,EPI_ISL_609138,EPI_ISL_609063,EPI_ISL_608870,EPI_ISL_609084,EPI_ISL_609038,EPI_ISL_608940,EPI_ISL_609030,EPI_ISL_609029,EPI_ISL_609042,EPI_ISL_609059,EPI_ISL_609139,EPI_ISL_6…	Lighthouse Lab in Milton Keynes	Wellcome Sanger Institute for the COVID-19 Genomics UK (COG-UK) consortium	The Lighthouse Lab in Milton Keynes et al
EPI_ISL_623223,EPI_ISL_623399,EPI_ISL_623503,EPI_ISL_623470,EPI_ISL_623320,EPI_ISL_623432,EPI_ISL_623381,EPI_ISL_623299,EPI_ISL_623382,EPI_ISL_623373,EPI_ISL_623355,EPI_ISL_623254,EPI_ISL_623538,EPI_ISL_623275,EPI_ISL_623453,EPI_ISL_623853,EPI_ISL_623678,EPI_ISL_623767,EPI_ISL_623783,EPI_ISL_623636,EPI_ISL_623807,EPI_ISL_623842,EPI_ISL_623563,EPI_ISL_623266,EPI_ISL_623226,EPI_ISL_623473,EPI_ISL_6…	Lighthouse Lab in Milton Keynes	Wellcome Sanger Institute for the COVID-19 Genomics UK (COG-UK) consortium	The Lighthouse Lab in Milton Keynes et al
EPI_ISL_629395,EPI_ISL_629150,EPI_ISL_629302,EPI_ISL_629306,EPI_ISL_629356,EPI_ISL_629405,EPI_ISL_629322,EPI_ISL_629175,EPI_ISL_629203,EPI_ISL_629341,EPI_ISL_629320,EPI_ISL_629238,EPI_ISL_629283,EPI_ISL_629118,EPI_ISL_629382,EPI_ISL_629181,EPI_ISL_629216,EPI_ISL_629257,EPI_ISL_629349,EPI_ISL_629374,EPI_ISL_629421,EPI_ISL_629267,EPI_ISL_629200,EPI_ISL_629146,EPI_ISL_629296,EPI_ISL_629286,EPI_ISL_6…	Lighthouse Lab in Milton Keynes	Wellcome Sanger Institute for the COVID-19 Genomics UK (COG-UK) consortium	The Lighthouse Lab in Milton Keynes et al
EPI_ISL_580961,EPI_ISL_580896,EPI_ISL_580980,EPI_ISL_580882,EPI_ISL_581046,EPI_ISL_580864,EPI_ISL_580898,EPI_ISL_580948,EPI_ISL_580921,EPI_ISL_581058,EPI_ISL_580929,EPI_ISL_581029,EPI_ISL_580873,EPI_ISL_580990,EPI_ISL_581064,EPI_ISL_581093,EPI_ISL_581106,EPI_ISL_581074,EPI_ISL_589787,EPI_ISL_580935,EPI_ISL_581078,EPI_ISL_580877,EPI_ISL_581076,EPI_ISL_580861,EPI_ISL_580875,EPI_ISL_581038,EPI_ISL_5…	Lighthouse Lab in Milton Keynes	Wellcome Sanger Institute for the COVID-19 Genomics UK (COG-UK) consortium	The Lighthouse Lab in Milton Keynes et al
EPI_ISL_572330,EPI_ISL_572331,EPI_ISL_572333,EPI_ISL_572397,EPI_ISL_573152,EPI_ISL_574259	Institute for Virology, University Hospital Duesseldorf, Medical Faculty, Heinrich-Heine-University Duesseldorf	Institute for Virology, University Hospital Duesseldorf, Medical Faculty, Heinrich-Heine-University Duesseldorf	Maximilian Damagnez et al
EPI_ISL_825046	NHL Municipal Medical College, Ahmedbad	Gujarat Biotechnology Research Centre	NM Shaikh et al
EPI_ISL_934416,EPI_ISL_933568	Macedonian Academy of Sciences and Arts	Research Center for Genetic Engineering and Biotechnology "Georgi D. Efremov” , Macedonian Academy of Sciences and Arts	RCGEB - MASA et al
EPI_ISL_794656	UNIDAD HEMATOLOGICA ESPECIALIZADA	Instituto Nacional de Salud - Dirección de Investigación en Salud Pública	Katherine Laiton-Donato et al
EPI_ISL_802136,EPI_ISL_802079,EPI_ISL_802103,EPI_ISL_802108,EPI_ISL_802148,EPI_ISL_802202,EPI_ISL_802188,EPI_ISL_802244,EPI_ISL_802233,EPI_ISL_802258,EPI_ISL_802417,EPI_ISL_802341,EPI_ISL_802357,EPI_ISL_802390,EPI_ISL_802425,EPI_ISL_802392,EPI_ISL_802393,EPI_ISL_802424,EPI_ISL_882805,EPI_ISL_421619,EPI_ISL_450049,EPI_ISL_450138,EPI_ISL_450145,EPI_ISL_801980,EPI_ISL_802034,EPI_ISL_801982,EPI_ISL_8…	MSHS Clinical Microbiology Laboratories	MSHS Pathogen Surveillance Program	Ana S. Gonzalez-Reiche et al
EPI_ISL_594461,EPI_ISL_594465	FL Bureau of Public Health Laboratories	Pathogen Discovery, Respiratory Viruses Branch, Division of Viral Diseases, Centers for Disease Control and Prevention	Ying Tao et al
EPI_ISL_452134	IL Department of Public Health Chicago Laboratory	Pathogen Discovery, Respiratory Viruses Branch, Division of Viral Diseases, Centers for Disease Control and Prevention	Krista Queen et al
EPI_ISL_475053	GMERS Medical College & Hospital	Gujarat Biotechnology Research Centre	Nidhi Patel et al
EPI_ISL_778869	Virology Lab, Ospedali Riuniti, Ancona	Dipartimento di Scenze Biomediche e Cliniche, L. Sacco, Università di Milano	Alessia Lai et al
EPI_ISL_476858,EPI_ISL_495036,EPI_ISL_495054	GMERS Medical College & Hospital, Gotri, Vadodara	Gujarat Biotechnology Research Centre	Monika Gandhi et al
EPI_ISL_854449,EPI_ISL_854393,EPI_ISL_854394,EPI_ISL_854395,EPI_ISL_854381,EPI_ISL_854382,EPI_ISL_854400,EPI_ISL_854396,EPI_ISL_854383,EPI_ISL_854384,EPI_ISL_854397,EPI_ISL_854385,EPI_ISL_854386,EPI_ISL_854387,EPI_ISL_854401,EPI_ISL_854388,EPI_ISL_854402,EPI_ISL_854389,EPI_ISL_854398,EPI_ISL_854403,EPI_ISL_854390,EPI_ISL_854377,EPI_ISL_854378,EPI_ISL_854391,EPI_ISL_854379,EPI_ISL_854392,EPI_ISL_8…	WESTCHESTER MEDICAL CENTER	Wadsworth Center, New York State Department of Health	Kirsten St. George et al
EPI_ISL_825044	NHL Municipal Medical College, Ahmedbad	Gujarat Biotechnology Research Centre	Monila Patel et al
EPI_ISL_490978,EPI_ISL_490988,EPI_ISL_490997,EPI_ISL_490998,EPI_ISL_490999,EPI_ISL_491000,EPI_ISL_491004	Mayo Clinic Laboratories	UW Virology Lab	Pavitra Roychoudhury et al
EPI_ISL_437452	B.J. Medical College and Civil hospital	Gujarat Biotechnology Research Centre	Gaurishankar Shrimali et al
EPI_ISL_437450,EPI_ISL_444480	B.J. Medical College and Civil hospital	Gujarat Biotechnology Research Centre	Bhavesh Modi et al
EPI_ISL_458095,EPI_ISL_467046,EPI_ISL_444471,EPI_ISL_447043	B.J. Medical College and Civil hospital	Gujarat Biotechnology Research Centre	Raghawendra Kumar et al
EPI_ISL_455680	Institute of pathogenic microbiology, Jiangsu Provincial Center for Disease Control and Prevention	Institute of pathogenic microbiology, Jiangsu Provincial Center for Disease Control and Prevention	Cui et al
EPI_ISL_591334,EPI_ISL_591327,EPI_ISL_591328,EPI_ISL_591338,EPI_ISL_591329,EPI_ISL_591330,EPI_ISL_591326,EPI_ISL_591331,EPI_ISL_591340,EPI_ISL_591332,EPI_ISL_591333,EPI_ISL_591335,EPI_ISL_591337	Dipartimento di Biotecnologie Mediche, University of Siena	Dipartimento di Biotecnologie Mediche, University of Siena	Cusi et al
EPI_ISL_583231,EPI_ISL_583230,EPI_ISL_583229,EPI_ISL_444051,EPI_ISL_444052,EPI_ISL_444053,EPI_ISL_444054,EPI_ISL_444055,EPI_ISL_444056,EPI_ISL_444057,EPI_ISL_444058,EPI_ISL_444059,EPI_ISL_444061,EPI_ISL_444062,EPI_ISL_444063,EPI_ISL_444064,EPI_ISL_444065,EPI_ISL_444066,EPI_ISL_444067,EPI_ISL_444068,EPI_ISL_444069,EPI_ISL_444070,EPI_ISL_444071,EPI_ISL_444073,EPI_ISL_444074,EPI_ISL_444075,EPI_ISL_4…	UCSF Clinical Microbiology Laboratory	Chan-Zuckerberg Biohub	CZB Cliahub Consortium et al
EPI_ISL_914804	AREA DE SALUD TURRIALBA-JIMENEZ	Inciensa, Instituto Costarricense de Investigación y Enseñanza en Nutrición y Salud	Francisco Duarte et al
EPI_ISL_454602	Croatian Institute of Public Health	University of Zagreb, Centre for research and knowledge transfer in biotechnology	Irena Tabain et al
EPI_ISL_850508	Hospital de Tortosa Verge de la Cinta	Hospital Universitari Vall d'Hebron - Vall d'Hebron Institut de Rercerca	Cristina Andrés et al
EPI_ISL_428358,EPI_ISL_428366	CH Jeanne de Navarre Laboratoire de Biologie	National Reference Center for Viruses of Respiratory Infections, Institut Pasteur, Paris	Mélanie Albert et al
EPI_ISL_445263,EPI_ISL_445358	MEGASALUD SPA.	Instituto de Salud Publica de Chile	Andrés E Castillo et al
EPI_ISL_424869	MD DOH Laboratories Administration	Pathogen Discovery, Respiratory Viruses Branch, Division of Viral Diseases, Centers for Disease Control and Prevention	Yan Li et al
EPI_ISL_463010,EPI_ISL_463011,EPI_ISL_463013,EPI_ISL_463014,EPI_ISL_463017,EPI_ISL_463018,EPI_ISL_463019,EPI_ISL_463020,EPI_ISL_463021,EPI_ISL_463022,EPI_ISL_463023,EPI_ISL_463024,EPI_ISL_463025,EPI_ISL_463026,EPI_ISL_463027,EPI_ISL_463029,EPI_ISL_463030,EPI_ISL_463031,EPI_ISL_463032,EPI_ISL_463033,EPI_ISL_463034,EPI_ISL_463035,EPI_ISL_463036,EPI_ISL_463037,EPI_ISL_463038,EPI_ISL_463039,EPI_ISL_4…	Institute of Life Sciences, Bhubaneswar	Immunogenomics lab, Institute of Life Sciences, Bhubaneswar	Sunil Raghav et al
EPI_ISL_418414,EPI_ISL_418415,EPI_ISL_418417,EPI_ISL_508881,EPI_ISL_419168	Centre Hospitalier de Valence	CNR Virus des Infections Respiratoires - France SUD	Antonin Bal et al
EPI_ISL_523930	Center of Medical Microbiology, Virology, and Hospital Hygiene, University of Duesseldorf	Universitätstr.1 40225 Düsseldorf Germany	Maximilian Damagnez et al
EPI_ISL_977356,EPI_ISL_977357,EPI_ISL_977358,EPI_ISL_977258,EPI_ISL_977294,EPI_ISL_977271,EPI_ISL_977272,EPI_ISL_977359,EPI_ISL_977360,EPI_ISL_977361,EPI_ISL_977362,EPI_ISL_977363,EPI_ISL_977364,EPI_ISL_977365,EPI_ISL_977366,EPI_ISL_977367,EPI_ISL_977257,EPI_ISL_977368,EPI_ISL_977369,EPI_ISL_977370,EPI_ISL_977371,EPI_ISL_977372,EPI_ISL_977373,EPI_ISL_977374,EPI_ISL_977375,EPI_ISL_977376,EPI_ISL_9…	University of Zambia, School of Veterinary Medicine	UNZAVET and PATH	Mulenga Mwenda-Chimfwembe et al
EPI_ISL_417443	State Key Laboratory for Emerging Infectious Diseases Department of Microbiology Li Ka Shing Faculty of Medicine The University of Hong Kong	State Key Laboratory for Emerging Infectious Diseases Department of Microbiology Li Ka Shing Faculty of Medicine The University of Hong Kong	Pui Wang et al
EPI_ISL_435281	Medistra Hospital Jakarta	Eijkman Institute for Molecular Biology, Ministry of Research and Technology/National Agency for Research and Innovation	Edison Johar et al
EPI_ISL_494771,EPI_ISL_494774,EPI_ISL_494775,EPI_ISL_494776,EPI_ISL_775239,EPI_ISL_775240,EPI_ISL_775243,EPI_ISL_775246,EPI_ISL_775257,EPI_ISL_775259,EPI_ISL_775261,EPI_ISL_494756,EPI_ISL_494757,EPI_ISL_494759,EPI_ISL_494761,EPI_ISL_494762,EPI_ISL_494763,EPI_ISL_959384	INT Fondazione Pascale	INT Fondazione Pascale	INT Fondazione Pascale et al
EPI_ISL_634978,EPI_ISL_634979,EPI_ISL_634981,EPI_ISL_634983,EPI_ISL_634984,EPI_ISL_634985,EPI_ISL_634986,EPI_ISL_634987,EPI_ISL_634988,EPI_ISL_634989,EPI_ISL_634990,EPI_ISL_634991,EPI_ISL_634993,EPI_ISL_634994,EPI_ISL_634995,EPI_ISL_634996,EPI_ISL_634997,EPI_ISL_634998,EPI_ISL_634999,EPI_ISL_635000,EPI_ISL_635001,EPI_ISL_635002,EPI_ISL_635003,EPI_ISL_635004,EPI_ISL_635005,EPI_ISL_635006,EPI_ISL_6…	National Health Laboratory Service - Inkosi Albert Luthuli Central Hospital (NHLS-IALCH)	KRISP, KZN Research Innovation and Sequencing Platform	Giandhari J et al
EPI_ISL_593914,EPI_ISL_593920	Hospital, Metz	National Reference Center for Viruses of Respiratory Infections, Institut Pasteur, Paris	Sylvie Behillil et al
EPI_ISL_583467,EPI_ISL_583471,EPI_ISL_583473,EPI_ISL_583477,EPI_ISL_583426,EPI_ISL_583429,EPI_ISL_583434,EPI_ISL_583435,EPI_ISL_583436,EPI_ISL_583441,EPI_ISL_583442,EPI_ISL_583452,EPI_ISL_583453,EPI_ISL_583454,EPI_ISL_583458,EPI_ISL_583459,EPI_ISL_583463,EPI_ISL_583464	Garcia-Sastre Laboratory, Department of Microbiology, Icahn School of Medicine at Mount Sinai	van Bakel Laboratory, Genetics and Genomics Sciences, Icahn School of Medicine at Mount Sinai	Teresa Aydillo et al
EPI_ISL_476860,EPI_ISL_495038,EPI_ISL_495056	GMERS Medical College & Hospital, Gotri, Vadodara	Gujarat Biotechnology Research Centre	Maharshi Pandya et al
EPI_ISL_489996,EPI_ISL_489997,EPI_ISL_489998,EPI_ISL_489999,EPI_ISL_490000,EPI_ISL_490001,EPI_ISL_490002,EPI_ISL_490003,EPI_ISL_490004,EPI_ISL_490005,EPI_ISL_490006,EPI_ISL_490007,EPI_ISL_490008,EPI_ISL_490009,EPI_ISL_490010,EPI_ISL_490011,EPI_ISL_490012	King Fahad Medical City	King Fahad Medical City	Alosaimi et al
EPI_ISL_981485	INSTITUT GUSTAVE ROUSSY	Department of Virology, Henri Mondor University Hospital, Assistance Publique Hôpitaux de Paris, Université Paris-Est Créteil, INSERM U955	Christophe Rodriguez et al
EPI_ISL_583727,EPI_ISL_583728,EPI_ISL_583729,EPI_ISL_583730,EPI_ISL_583731,EPI_ISL_583732,EPI_ISL_583733,EPI_ISL_583735,EPI_ISL_583736,EPI_ISL_583737,EPI_ISL_583738,EPI_ISL_583739,EPI_ISL_583740,EPI_ISL_583741,EPI_ISL_583742,EPI_ISL_583743,EPI_ISL_583744,EPI_ISL_583745,EPI_ISL_583746,EPI_ISL_583747,EPI_ISL_583748,EPI_ISL_583749,EPI_ISL_583750,EPI_ISL_583751,EPI_ISL_583752,EPI_ISL_583753,EPI_ISL_5…	Dr. Gernot Walder GmbH	Bergthaler laboratory, CeMM Research Center for Molecular Medicine of the Austrian Academy of Sciences	Alexandra Popa et al
EPI_ISL_524465	PS Municipal Dr. Caetano Virgílio Neto	Instituto Adolfo Lutz, Interdiciplinary Procedures Center, Strategic Laboratory	Claudio Tavares Sacchi et al
EPI_ISL_861645	Hospital e Pronto Socorro Comunitario Vila Iolanda	Instituto Adolfo Lutz, Interdiciplinary Procedures Center, Strategic Laboratory	Claudio Tavares Sacchi et al
EPI_ISL_862881	Kitakyushu Municipal Medical Center	Fujita health University, School of Medicine, Department of Microbiology	Masahiro suzuki et al
EPI_ISL_452114,EPI_ISL_424867	KS Health and Environmental Laboratories	Pathogen Discovery, Respiratory Viruses Branch, Division of Viral Diseases, Centers for Disease Control and Prevention	Yan Li et al
EPI_ISL_965957,EPI_ISL_965952	Consejería de Sanidad y Asuntos Sociales de Castilla La Mancha	Instituto de Salud Carlos III	Iglesias-Caballero et al
EPI_ISL_603248,EPI_ISL_605791	Brotman Baty Institute for Precision Medicine	Brotman Baty Institute for Precision Medicine	Trevor Bedford et al
EPI_ISL_833577,EPI_ISL_833576	Veterinary Specialized Instute "Nis"	Veterinary Specialized Institute "Nis", Serbia	Vidanovic et al
EPI_ISL_982627,EPI_ISL_982539,EPI_ISL_982628,EPI_ISL_982629,EPI_ISL_982630,EPI_ISL_982585	Landstuhl Regional Medical Center	US Air Force School of Aerospace Medicine	Anthony Fries et al
EPI_ISL_482120,EPI_ISL_482123,EPI_ISL_482122,EPI_ISL_482126,EPI_ISL_482127,EPI_ISL_482121,EPI_ISL_482130,EPI_ISL_482128,EPI_ISL_482060,EPI_ISL_482061,EPI_ISL_482067,EPI_ISL_482059,EPI_ISL_482064,EPI_ISL_482068,EPI_ISL_482062,EPI_ISL_482063,EPI_ISL_482058,EPI_ISL_482066,EPI_ISL_482065	The Department of Microbiology, Torbay and South Devon NHS Foundation Trust	Wellcome Sanger Institute for the COVID-19 Genomics UK (COG-UK) consortium	Amy Hurd et al
EPI_ISL_861662	CS I Tacito Leite de Carvalho e Silva	Instituto Adolfo Lutz, Interdiciplinary Procedures Center, Strategic Laboratory	Claudio Tavares Sacchi et al
EPI_ISL_515529	Pronto Socorro Municipal Julio Tupy	Instituto Adolfo Lutz, Interdiciplinary Procedures Center, Strategic Laboratory	Claudio Tavares Sacchi et al
EPI_ISL_469057	Inger Landgren	The Public Health Agency of Sweden	Oskar Karlsson Lindsjo et al
EPI_ISL_593646,EPI_ISL_593647,EPI_ISL_593648,EPI_ISL_767931,EPI_ISL_806723,EPI_ISL_806726,EPI_ISL_806727,EPI_ISL_513348,EPI_ISL_513349,EPI_ISL_513402,EPI_ISL_513413,EPI_ISL_526186	4Cyte Pathology	NSW Health Pathology - Institute of Clinical Pathology and Medical Research; Westmead Hospital; University of Sydney	CIDM-PH et al. et al
EPI_ISL_437192	Mitra Keluarga Kelapa Gading Hospital	Eijkman Institute for Molecular Biology, Ministry of Research and Technology/National Agency for Research and Innovation	Edison Johar et al
EPI_ISL_818342	Charité Universitätsmedizin Berlin, Institute of Virology	Charité Universitätsmedizin Berlin, Institute of Virology	Victor M Corman et al
EPI_ISL_807155,EPI_ISL_807156,EPI_ISL_807154	Deva County Emergency Hospital	National Institute of Infectious Diseases-Prof. Dr. Matei Bals Molecular Diagnostics Laboratory	Leontina Banica et al
EPI_ISL_833278,EPI_ISL_833279,EPI_ISL_833280,EPI_ISL_833311,EPI_ISL_833312	SIESP CHIETI- DRIVE IN CHIETI	Istituto Zooprofilattico Sperimentale dell’Abruzzo e Molise “G. Caporale”	Lorusso A et al
EPI_ISL_458091,EPI_ISL_467043,EPI_ISL_495018,EPI_ISL_444467,EPI_ISL_447039	B.J. Medical College and Civil hospital	Gujarat Biotechnology Research Centre	Maharshi Pandya et al
EPI_ISL_475040,EPI_ISL_500949	Department of MicroBiology, Government Medical College, Surat	Gujarat Biotechnology Research Centre	Komal Patel et al
EPI_ISL_768829	Hôpital d'Instruction des Armées Sainte-Anne	CNR Virus des Infections Respiratoires - France SUD	Antonin Bal et al
EPI_ISL_954919,EPI_ISL_954896,EPI_ISL_954835,EPI_ISL_954897,EPI_ISL_954898,EPI_ISL_954899,EPI_ISL_954900,EPI_ISL_954829,EPI_ISL_954901,EPI_ISL_954825,EPI_ISL_954832,EPI_ISL_954820,EPI_ISL_710133,EPI_ISL_677254,EPI_ISL_677253,EPI_ISL_677258,EPI_ISL_677261,EPI_ISL_677242,EPI_ISL_677286,EPI_ISL_677287,EPI_ISL_677259,EPI_ISL_677260,EPI_ISL_677246,EPI_ISL_710301,EPI_ISL_710180,EPI_ISL_710181,EPI_ISL_7…	Colorado Department of Public Health and Environment	Colorado Department of Puplic Health and Environment	Laura Bankers et al
EPI_ISL_524766	GMERS Medical College and Hospital, Dharpur, Patan	Gujarat Biotechnology Research Centre	Janvi Raval et al
EPI_ISL_906885,EPI_ISL_906886,EPI_ISL_906887,EPI_ISL_906889,EPI_ISL_906891,EPI_ISL_906892,EPI_ISL_906894,EPI_ISL_906895,EPI_ISL_906897,EPI_ISL_906898,EPI_ISL_906899,EPI_ISL_906900,EPI_ISL_906903,EPI_ISL_906906,EPI_ISL_906908,EPI_ISL_906909,EPI_ISL_906913	Bureau of Public Health Laboratories, Florida Department of Health (BPHL, FLDOH)	Bureau of Public Health Laboratories, Florida Department of Health (BPHL, FLDOH)	Schmedes et al
EPI_ISL_420791,EPI_ISL_420792	NH Department of Health and Human Services Public Health Labs	Pathogen Discovery, Respiratory Viruses Branch, Division of Viral Diseases, Centers for Disease Control and Prevention	Krista Queen et al
EPI_ISL_955235	UMF 23 UNIDAD MORELOS	BIOBANCO / COCTI	Borja-Aburto VH et al
EPI_ISL_408487	National Institute for Viral Disease Control and Prevention, China CDC	National Institute for Viral Disease Control & Prevention, China CDC	Wenjie Tan et al
EPI_ISL_961701	Ospedale Civile Teramo	Istituto Zooprofilattico Sperimentale dell’Abruzzo e Molise “G. Caporale”	Lorusso A et al
EPI_ISL_569615	Quick Care Huron	South Dakota Public Health Laboratory	Matt Plumb et al
EPI_ISL_634832,EPI_ISL_700363	Laboratoire de virologie, CHU de Grenoble - CS 10217 - 38043 Grenoble cedex 24	CNR Virus des Infections Respiratoires - France SUD	Antonin Bal et al
EPI_ISL_417153,EPI_ISL_417154,EPI_ISL_417155,EPI_ISL_417156,EPI_ISL_417157,EPI_ISL_417158,EPI_ISL_417159,EPI_ISL_417160,EPI_ISL_417161,EPI_ISL_417162,EPI_ISL_417166,EPI_ISL_417167,EPI_ISL_417168,EPI_ISL_417169,EPI_ISL_417170,EPI_ISL_417171,EPI_ISL_417172,EPI_ISL_417065,EPI_ISL_417174,EPI_ISL_417175,EPI_ISL_417066,EPI_ISL_417067,EPI_ISL_417068,EPI_ISL_417069,EPI_ISL_417070,EPI_ISL_417071,EPI_ISL_4…	Washington State Department of Health	Seattle Flu Study	Chu etl al et al
EPI_ISL_512754,EPI_ISL_512755,EPI_ISL_512756,EPI_ISL_512757,EPI_ISL_512758,EPI_ISL_512759,EPI_ISL_512760,EPI_ISL_512761,EPI_ISL_512762,EPI_ISL_512763,EPI_ISL_512764,EPI_ISL_512765,EPI_ISL_596677,EPI_ISL_596678,EPI_ISL_596679,EPI_ISL_596680,EPI_ISL_596681,EPI_ISL_596682,EPI_ISL_596683,EPI_ISL_596684,EPI_ISL_596685,EPI_ISL_596686,EPI_ISL_596687,EPI_ISL_596688,EPI_ISL_596689,EPI_ISL_596690,EPI_ISL_5…	PathWest Laboratory Medicine WA	PathWest Laboratory Medicine WA Microbial Surveillance Unit	PathWest Laboratory Medicine WA Microbial Surveillance Unit et al
EPI_ISL_708723,EPI_ISL_708735,EPI_ISL_699464	Regional Medical Sciences Center 11/1 phuket	National Institute of Health, Department of Medical Sciences, Ministry of Public Health, Thailand	Pilailuk Okada et al
EPI_ISL_528550,EPI_ISL_528551,EPI_ISL_528553,EPI_ISL_528555,EPI_ISL_528556,EPI_ISL_528558,EPI_ISL_528559,EPI_ISL_528560,EPI_ISL_528561,EPI_ISL_528562,EPI_ISL_528563,EPI_ISL_528564,EPI_ISL_528588,EPI_ISL_528589,EPI_ISL_528595,EPI_ISL_528617,EPI_ISL_528618,EPI_ISL_528619,EPI_ISL_528622,EPI_ISL_528624,EPI_ISL_528631,EPI_ISL_528633,EPI_ISL_528636	National Genomics Core-Center for DNA Fingerprinting and Diagnostics	National Genomics Core- Center for DNA Fingerprinting and Diagnostics (NGC-CDFD)- DBT's PAN-INDIA-1000 Genome consortium	Heena Shah et al
EPI_ISL_457981,EPI_ISL_491968,EPI_ISL_491969,EPI_ISL_491970,EPI_ISL_491973,EPI_ISL_491974,EPI_ISL_491976,EPI_ISL_491978,EPI_ISL_491979,EPI_ISL_491980,EPI_ISL_491981,EPI_ISL_491982,EPI_ISL_491983,EPI_ISL_491984,EPI_ISL_491985,EPI_ISL_491986,EPI_ISL_491988,EPI_ISL_491989,EPI_ISL_491990,EPI_ISL_491991,EPI_ISL_491992,EPI_ISL_491993,EPI_ISL_491994,EPI_ISL_491995,EPI_ISL_491996,EPI_ISL_491997,EPI_ISL_4…	Oman-NIC	Department of Microbiology and Immunology-SQUH	Fahad Zadjali et al
EPI_ISL_450816	orestadsklinikens VC	The Public Health Agency of Sweden	Lisa Kjellberg / Laura Plavitu et al
EPI_ISL_436641,EPI_ISL_436642,EPI_ISL_436643,EPI_ISL_436644,EPI_ISL_436645,EPI_ISL_436646,EPI_ISL_436647,EPI_ISL_436648,EPI_ISL_436650,EPI_ISL_436651,EPI_ISL_436652,EPI_ISL_436653,EPI_ISL_436654,EPI_ISL_436655,EPI_ISL_436656,EPI_ISL_436657,EPI_ISL_436658,EPI_ISL_436659,EPI_ISL_436660,EPI_ISL_436661,EPI_ISL_436662,EPI_ISL_436663,EPI_ISL_436664,EPI_ISL_436665,EPI_ISL_436666,EPI_ISL_436667,EPI_ISL_4…	County of Santa Clara Public Health Department	Chan-Zuckerberg Biohub	CZB Cliahub Consortium et al
EPI_ISL_860548,EPI_ISL_860550,EPI_ISL_860547	St.Olavs hospital/NTNU	IKOM, NTNU	Aleksandr Ianevski et al
EPI_ISL_413569,EPI_ISL_413570,EPI_ISL_413575,EPI_ISL_413576,EPI_ISL_413581	RIVM	Erasmus Medical Center	David Nieuwenhuijse et al
EPI_ISL_956275	Thai Red Cross Emerging Infectious Diseases Health Science Centre, Chulalongkorn Hospital, Faculty of Medicine, Chulalongkorn University	Thai Red Cross Emerging Infectious Diseases Center and Faculty of Medicine, Chulalongkorn University	Ratima samorn et al
EPI_ISL_412979,EPI_ISL_412980	Union Hospital of Tongji Medical College, Huazhong University of Science and Technology	Hubei Provincial Center for Disease Control and Prevention	Bin Fang et al
EPI_ISL_509690,EPI_ISL_509691,EPI_ISL_509692,EPI_ISL_509693,EPI_ISL_509694,EPI_ISL_509689	Utah Public Health Laboratory	Pathogen Discovery, Respiratory Viruses Branch, Division of Viral Diseases, Centers for Disease Control and Prevention	Ying Tao et al
EPI_ISL_848188,EPI_ISL_848189,EPI_ISL_848190,EPI_ISL_848191,EPI_ISL_848193,EPI_ISL_848194,EPI_ISL_848195,EPI_ISL_848196,EPI_ISL_848197,EPI_ISL_848198,EPI_ISL_852820,EPI_ISL_852822,EPI_ISL_852824,EPI_ISL_852826,EPI_ISL_852827,EPI_ISL_852829,EPI_ISL_852830,EPI_ISL_852831,EPI_ISL_852832,EPI_ISL_852833,EPI_ISL_853274,EPI_ISL_853315	Microbiology Lab	NBCC Sequencing Facility	Dr. Jeff Wrana et al
EPI_ISL_955248	BCO SANGRE CM LA RAZA	BIOBANCO / COCTI	Borja-Aburto VH et al
EPI_ISL_417340,EPI_ISL_508938,EPI_ISL_508944,EPI_ISL_418426,EPI_ISL_525539,EPI_ISL_419183,EPI_ISL_419185,EPI_ISL_419186,EPI_ISL_420620,EPI_ISL_508968,EPI_ISL_636481,EPI_ISL_582121,EPI_ISL_639984	Centre Hospitalier de Bourg en Bresse	CNR Virus des Infections Respiratoires - France SUD	Antonin Bal et al
EPI_ISL_623104,EPI_ISL_623105	Simile Medicina Diagnóstica	Bioinformatics Laboratory / LNCC	Carolina M Voloch et al
EPI_ISL_977502	Hospital Oriente de Asturias	Laboratorio de Virología HUCA	Sandoval M et al
EPI_ISL_471554	Hospital Bosque da Saúde	Instituto Adolfo Lutz, Interdiciplinary Procedures Center, Strategic Laboratory	Claudio Tavares Sacchi et al
EPI_ISL_913985,EPI_ISL_913987,EPI_ISL_913988,EPI_ISL_913989,EPI_ISL_955311,EPI_ISL_913999	TX DSHS, Lab Services Section MC 1947	Pathogen Discovery, Respiratory Viruses Branch, Division of Viral Diseases, Centers for Disease Control and Prevention	Ying Tao et al
EPI_ISL_591505,EPI_ISL_591506,EPI_ISL_767881,EPI_ISL_767894,EPI_ISL_767895,EPI_ISL_767915,EPI_ISL_767927,EPI_ISL_872581,EPI_ISL_513330,EPI_ISL_513347,EPI_ISL_513353,EPI_ISL_513354,EPI_ISL_513355,EPI_ISL_513356,EPI_ISL_513361,EPI_ISL_513362,EPI_ISL_513363,EPI_ISL_513364,EPI_ISL_513365,EPI_ISL_513372,EPI_ISL_513379,EPI_ISL_513384,EPI_ISL_513385,EPI_ISL_513396,EPI_ISL_513397,EPI_ISL_513398,EPI_ISL_5…	St Vincent's Pathology (SydPath)	NSW Health Pathology - Institute of Clinical Pathology and Medical Research; Westmead Hospital; University of Sydney	CIDM-PH et al. et al
EPI_ISL_469039	GMERS Medical College & Hospital	Gujarat Biotechnology Research Centre	Labdhi Pandya et al
EPI_ISL_922076	General Hospital #Abdulah Nakas" Sarajevo	Alea Genetic Centre	Rijad Konjhodzic et al
EPI_ISL_708811,EPI_ISL_708810	Regional medical sciences center 2 Phitsanulok	National Institute of Health, Department of Medical Sciences, Ministry of Public Health, Thailand	Pilailuk Okada et al
EPI_ISL_900513,EPI_ISL_900524	Labosud	CNR Virus des Infections Respiratoires - France SUD	Antonin Bal et al
EPI_ISL_428901,EPI_ISL_428899,EPI_ISL_428920,EPI_ISL_428919,EPI_ISL_428924,EPI_ISL_428898,EPI_ISL_428880,EPI_ISL_428875,EPI_ISL_428881,EPI_ISL_428877,EPI_ISL_428876,EPI_ISL_428872,EPI_ISL_428900,EPI_ISL_428905,EPI_ISL_428918,EPI_ISL_428878,EPI_ISL_428902,EPI_ISL_428895,EPI_ISL_428903,EPI_ISL_428897,EPI_ISL_428873,EPI_ISL_428879,EPI_ISL_428923,EPI_ISL_428922,EPI_ISL_428917,EPI_ISL_428921,EPI_ISL_4…	State Research Center of Virology and Biotechnology VECTOR, Department of Collection of Microorganisms	State Research Center of Virology and Biotechnology VECTOR, Department of Collection of Microorganisms	Sergey A. Bodnev et al
EPI_ISL_769993	Area De Salud El Guarco	Inciensa, Instituto Costarricense de Investigación y Enseñanza en Nutrición y Salud	Francisco Duarte et al
EPI_ISL_631563,EPI_ISL_631579,EPI_ISL_631586,EPI_ISL_631589,EPI_ISL_631602,EPI_ISL_631606,EPI_ISL_631614,EPI_ISL_631616,EPI_ISL_631620,EPI_ISL_631638,EPI_ISL_631692,EPI_ISL_631696,EPI_ISL_631699,EPI_ISL_631700,EPI_ISL_631701,EPI_ISL_631707,EPI_ISL_631708,EPI_ISL_631710,EPI_ISL_631714,EPI_ISL_631715,EPI_ISL_631724,EPI_ISL_631725,EPI_ISL_631727,EPI_ISL_631732,EPI_ISL_631756,EPI_ISL_631766,EPI_ISL_6…	Flushing Hospital Medical Center	New York City Public Health Laboratory	Jade Wang et al
EPI_ISL_487192	Viral Respiratory Lab, National institute for Biomedical Research (INRB)	Pathogen Sequencing Lab, National Institute for Biomedical Research (INRB)	Placide Mbala-Kingebeni et al
EPI_ISL_525467,EPI_ISL_525468,EPI_ISL_525469	Universidad Iberoamericana	International Centre for Genetic Engineering and Biotechnology (ICGEB) and ARGO Open Lab Platform	Robert Paulino-Ramirez et al
EPI_ISL_861683	Complexo Hospitalar Padre Bento de Guarulhos	Instituto Adolfo Lutz, Interdiciplinary Procedures Center, Strategic Laboratory	Claudio Tavares Sacchi et al
EPI_ISL_877423	Primasatya Husada Citra Hospital	Institute of Tropical Disease, Universitas Airlangga	Maria I Lusida et al
EPI_ISL_419691	E. Gulbja Laboratorija	Charité Universitätsmedizin Berlin, Institute of Virology	Victor M Corman et al
EPI_ISL_718287,EPI_ISL_718289,EPI_ISL_718290,EPI_ISL_718291,EPI_ISL_718292,EPI_ISL_718293,EPI_ISL_718294,EPI_ISL_718295,EPI_ISL_718296,EPI_ISL_718297,EPI_ISL_718298,EPI_ISL_718300,EPI_ISL_718301,EPI_ISL_718303,EPI_ISL_718304,EPI_ISL_718305,EPI_ISL_718306,EPI_ISL_718308,EPI_ISL_718284,EPI_ISL_728158,EPI_ISL_728160,EPI_ISL_728161,EPI_ISL_728162,EPI_ISL_728163,EPI_ISL_728165,EPI_ISL_728166,EPI_ISL_7…	Institute for Medical Research, Infectious Disease Research Centre, National Institutes of Health, Ministry of Health Malaysia	Institute for Medical Research, Infectious Disease Research Centre, National Institutes of Health, Ministry of Health Malaysia	Suppiah J et al
EPI_ISL_576131,EPI_ISL_576132,EPI_ISL_576133,EPI_ISL_576134,EPI_ISL_576135,EPI_ISL_576136,EPI_ISL_576137,EPI_ISL_576138,EPI_ISL_576139,EPI_ISL_576140,EPI_ISL_576141,EPI_ISL_576142,EPI_ISL_576143,EPI_ISL_576144,EPI_ISL_593597,EPI_ISL_593598,EPI_ISL_593599,EPI_ISL_593600,EPI_ISL_593601,EPI_ISL_593602,EPI_ISL_593603,EPI_ISL_593604,EPI_ISL_593605,EPI_ISL_593606,EPI_ISL_593607,EPI_ISL_593608,EPI_ISL_5…	Public Health Virology Laboratory, Forensic and Scientific Services (PHV-FSS)	Public Health Virology Laboratory, Forensic and Scientific Services (PHV-FSS)	Son Nguyen et al et al
EPI_ISL_631509,EPI_ISL_631533,EPI_ISL_631536,EPI_ISL_631539,EPI_ISL_631540,EPI_ISL_631542,EPI_ISL_632038,EPI_ISL_632041,EPI_ISL_632042,EPI_ISL_632045,EPI_ISL_632047	New York Presbyterian Lower Manhattan	New York City Public Health Laboratory	Jade Wang et al
EPI_ISL_408669,EPI_ISL_408665,EPI_ISL_408666,EPI_ISL_408667	Dept. of Virology III, National Institute of Infectious Diseases	Pathogen Genomics Center, National Institute of Infectious Diseases	Tsuyoshi Sekizuka et al
EPI_ISL_631581,EPI_ISL_631588,EPI_ISL_631793,EPI_ISL_631794,EPI_ISL_631802,EPI_ISL_631977,EPI_ISL_632080,EPI_ISL_632091,EPI_ISL_632092,EPI_ISL_632135,EPI_ISL_632148,EPI_ISL_632153,EPI_ISL_632158,EPI_ISL_632160,EPI_ISL_632161	SUNY Downstate Medical Center	New York City Public Health Laboratory	Jade Wang et al
EPI_ISL_681705,EPI_ISL_681706,EPI_ISL_681708,EPI_ISL_681711,EPI_ISL_681712,EPI_ISL_681714,EPI_ISL_681715,EPI_ISL_681716,EPI_ISL_681717,EPI_ISL_681718,EPI_ISL_681720,EPI_ISL_681721,EPI_ISL_681726,EPI_ISL_681731,EPI_ISL_681732,EPI_ISL_681733,EPI_ISL_681734,EPI_ISL_681735,EPI_ISL_681736,EPI_ISL_681737,EPI_ISL_681738,EPI_ISL_681739,EPI_ISL_681742,EPI_ISL_681743,EPI_ISL_763351,EPI_ISL_681744,EPI_ISL_6…	University Hospital Limerick	Irish Coronavirus Sequencing Consortium - Teagasc Moorepark	Paul Cotter et al
EPI_ISL_418006	CHBarreiro Montijo	Instituto Nacional de Saude (INSA)	Guiomar et al et al
EPI_ISL_535745,EPI_ISL_535994	Hôpital Laurentien	Laboratoire de santé publique du Québec	Sandrine Moreira et al
EPI_ISL_509567,EPI_ISL_509568,EPI_ISL_509569,EPI_ISL_509570,EPI_ISL_509571,EPI_ISL_509572,EPI_ISL_509573,EPI_ISL_509574,EPI_ISL_498630,EPI_ISL_498631,EPI_ISL_498632,EPI_ISL_498633,EPI_ISL_498634,EPI_ISL_498635,EPI_ISL_498637,EPI_ISL_498638,EPI_ISL_470744,EPI_ISL_470743,EPI_ISL_470742,EPI_ISL_470745,EPI_ISL_470719,EPI_ISL_470729,EPI_ISL_470730,EPI_ISL_470731,EPI_ISL_470732,EPI_ISL_470733,EPI_ISL_4…	Utah Public Health Laboratory	Utah Public Health Laboratory	Heidi Butz et al
EPI_ISL_415651,EPI_ISL_415652,EPI_ISL_414626,EPI_ISL_415649	unknown	National Reference Center for Viruses of Respiratory Infections, Institut Pasteur, Paris	Mélnie Albert et al
EPI_ISL_845891,EPI_ISL_845892	Benaroya Research Institute	UW Virology Lab	Pavitra Roychoudhury et al
EPI_ISL_568686	RSUD Prof. DR. Margono Soekarjo	Eijkman Institute for Molecular Biology, Ministry of Research and Technology/National Agency for Research and Innovation	Frilasita A Yudhaputri et al
EPI_ISL_751566,EPI_ISL_751785,EPI_ISL_751786,EPI_ISL_751746,EPI_ISL_751589,EPI_ISL_903645,EPI_ISL_903775,EPI_ISL_903813,EPI_ISL_903570,EPI_ISL_903784,EPI_ISL_903795,EPI_ISL_903576,EPI_ISL_903881,EPI_ISL_903786	WVDHHR - Office of Laboratory Services	Genomics and Discovery, Respiratory Viruses Branch, Division of Viral Diseases, Centers for Disease Control and Prevention	Krista Queen et al
EPI_ISL_735504,EPI_ISL_735505,EPI_ISL_735506,EPI_ISL_738144,EPI_ISL_767013,EPI_ISL_767043	University of Bari Biomedical Sciences and Human Oncology	University of Bari Biomedical Sciences and Human Oncology	Maria Chironna et al
EPI_ISL_505003	Biology Dpt	Microbiology and Infections Diseases	Emmanuelle Billon-Denis et al
EPI_ISL_436292,EPI_ISL_436312,EPI_ISL_436332,EPI_ISL_436352,EPI_ISL_436403,EPI_ISL_420127,EPI_ISL_447472,EPI_ISL_447486,EPI_ISL_447500,EPI_ISL_447514,EPI_ISL_447527,EPI_ISL_425203	Servicio de Microbiologia. Hospital Clinico Universitario de Valencia	Sequencing and Bioinformatics Service and Molecular Epidemiology Research Group. FISABIO-Public Health	Maria Alma Bracho et al
EPI_ISL_955240,EPI_ISL_955241	HGZ 30 MEXICALI	BIOBANCO / COCTI	Borja-Aburto VH et al
EPI_ISL_954231,EPI_ISL_954241,EPI_ISL_954242,EPI_ISL_954243,EPI_ISL_954244,EPI_ISL_954245,EPI_ISL_954246,EPI_ISL_954247,EPI_ISL_954248,EPI_ISL_954249,EPI_ISL_954250,EPI_ISL_954251,EPI_ISL_954252,EPI_ISL_954253,EPI_ISL_954240,EPI_ISL_954254,EPI_ISL_954232,EPI_ISL_954233,EPI_ISL_954234,EPI_ISL_954235,EPI_ISL_954228,EPI_ISL_954236,EPI_ISL_954237,EPI_ISL_954238,EPI_ISL_954239,EPI_ISL_954255,EPI_ISL_9…	MRC/UVRI & LSHTM Uganda Research Unit	Where sequence data have been generated and submitted to GISAID	Matthew Cotten et al
EPI_ISL_535807,EPI_ISL_535872,EPI_ISL_535873,EPI_ISL_535958,EPI_ISL_535959,EPI_ISL_536115,EPI_ISL_536199,EPI_ISL_536204	Centre hospitalier régional du Grand Portage	Laboratoire de santé publique du Québec	Sandrine Moreira et al
EPI_ISL_833252	Ospedale Civile Giulianova-Pronto Soccorso	Istituto Zooprofilattico Sperimentale dell’Abruzzo e Molise “G. Caporale”	Lorusso A et al
EPI_ISL_535650,EPI_ISL_535652,EPI_ISL_535654,EPI_ISL_535658,EPI_ISL_535659,EPI_ISL_535661	AR Dept. of Health-Public Health Lab	Pathogen Discovery, Respiratory Viruses Branch, Division of Viral Diseases, Centers for Disease Control and Prevention	Brian Lynch et al
EPI_ISL_780385,EPI_ISL_780386,EPI_ISL_780387,EPI_ISL_780388,EPI_ISL_780389,EPI_ISL_780390,EPI_ISL_780391,EPI_ISL_780392,EPI_ISL_780393,EPI_ISL_780394,EPI_ISL_780382,EPI_ISL_780395,EPI_ISL_780396,EPI_ISL_780397,EPI_ISL_780398,EPI_ISL_780399,EPI_ISL_780400,EPI_ISL_780401,EPI_ISL_780402,EPI_ISL_780403,EPI_ISL_780383,EPI_ISL_780404,EPI_ISL_780405,EPI_ISL_780406,EPI_ISL_780407,EPI_ISL_780408,EPI_ISL_7…	Bermuda Government Molecular Diagnostics Laboratory (MDL)	Respiratory Virus Unit, National Infection Service, Public Health England	PHE Covid Sequencing Team et al
EPI_ISL_862552,EPI_ISL_862570,EPI_ISL_862571,EPI_ISL_862572,EPI_ISL_862645,EPI_ISL_862646,EPI_ISL_862648,EPI_ISL_862647,EPI_ISL_862550,EPI_ISL_539569,EPI_ISL_539570,EPI_ISL_862649,EPI_ISL_862651,EPI_ISL_539571,EPI_ISL_539572,EPI_ISL_862650,EPI_ISL_954786,EPI_ISL_954802,EPI_ISL_954791,EPI_ISL_954784,EPI_ISL_954804,EPI_ISL_965944,EPI_ISL_965950,EPI_ISL_965956,EPI_ISL_965943,EPI_ISL_965942	Complejo Hospitalario de Navarra	Instituto de Salud Carlos III	Iglesias-Caballero et al
EPI_ISL_562761,EPI_ISL_562762,EPI_ISL_562078,EPI_ISL_562728,EPI_ISL_561676,EPI_ISL_562763,EPI_ISL_562764,EPI_ISL_562765,EPI_ISL_561865,EPI_ISL_562637,EPI_ISL_562766,EPI_ISL_562767,EPI_ISL_562768,EPI_ISL_562769,EPI_ISL_562770,EPI_ISL_562771,EPI_ISL_561482,EPI_ISL_562772,EPI_ISL_562773,EPI_ISL_562083,EPI_ISL_561436,EPI_ISL_562774,EPI_ISL_562775,EPI_ISL_562776,EPI_ISL_561454,EPI_ISL_562777,EPI_ISL_5…	Microbiological Diagnostic Unit - Public Health Laboratory (MDU-PHL)	MDU-PHL	Seemann et al
EPI_ISL_562063,EPI_ISL_563514,EPI_ISL_563515,EPI_ISL_563516,EPI_ISL_561518,EPI_ISL_563517,EPI_ISL_563518,EPI_ISL_563519,EPI_ISL_563520,EPI_ISL_563521,EPI_ISL_563522,EPI_ISL_563523,EPI_ISL_563524,EPI_ISL_563525,EPI_ISL_563526,EPI_ISL_563527,EPI_ISL_561505,EPI_ISL_563528,EPI_ISL_563529,EPI_ISL_563530,EPI_ISL_563531,EPI_ISL_563532,EPI_ISL_563533,EPI_ISL_563534,EPI_ISL_561704,EPI_ISL_563535,EPI_ISL_5…	Microbiological Diagnostic Unit - Public Health Laboratory (MDU-PHL)	MDU-PHL	Seemann et al
EPI_ISL_564616,EPI_ISL_564617,EPI_ISL_564618,EPI_ISL_564619,EPI_ISL_564620,EPI_ISL_564621,EPI_ISL_564622,EPI_ISL_564623,EPI_ISL_564624,EPI_ISL_564625,EPI_ISL_564626,EPI_ISL_564627,EPI_ISL_564628,EPI_ISL_564629,EPI_ISL_562022,EPI_ISL_562133,EPI_ISL_564630,EPI_ISL_564631,EPI_ISL_564632,EPI_ISL_564633,EPI_ISL_564634,EPI_ISL_564635,EPI_ISL_564636,EPI_ISL_564637,EPI_ISL_564638,EPI_ISL_564639,EPI_ISL_5…	Microbiological Diagnostic Unit - Public Health Laboratory (MDU-PHL)	MDU-PHL	Seemann et al
EPI_ISL_561700,EPI_ISL_565537,EPI_ISL_565538,EPI_ISL_565539,EPI_ISL_562674,EPI_ISL_562675,EPI_ISL_562676,EPI_ISL_565540,EPI_ISL_561382,EPI_ISL_561882,EPI_ISL_565541,EPI_ISL_562159,EPI_ISL_565542,EPI_ISL_561861,EPI_ISL_562698,EPI_ISL_565543,EPI_ISL_562677,EPI_ISL_565544,EPI_ISL_565545,EPI_ISL_565546,EPI_ISL_561689,EPI_ISL_565547,EPI_ISL_561662,EPI_ISL_565548,EPI_ISL_565549,EPI_ISL_565550,EPI_ISL_5…	Microbiological Diagnostic Unit - Public Health Laboratory (MDU-PHL)	MDU-PHL	Seemann et al
EPI_ISL_792500,EPI_ISL_792501,EPI_ISL_792502,EPI_ISL_792503,EPI_ISL_792504,EPI_ISL_792505,EPI_ISL_792506,EPI_ISL_792508,EPI_ISL_792510,EPI_ISL_792511	Laboratorio de Inmunología del Hospital Perrando e Instituto de Medicina Regional de la UNNE	Grupo de Genómica y Bioinformática del Instituto de Investigación de la Cadena Láctea CONICET-INTA on behalf of 'Proyecto Argentino Interinstitucional de genomica de SARS-CoV-2' (PAIS Consortium)	Eberhardt et al
EPI_ISL_978887,EPI_ISL_862718,EPI_ISL_978811,EPI_ISL_978867,EPI_ISL_978880,EPI_ISL_978881,EPI_ISL_978882,EPI_ISL_978883,EPI_ISL_978884,EPI_ISL_978885,EPI_ISL_978886,EPI_ISL_978888,EPI_ISL_978889,EPI_ISL_978918,EPI_ISL_978919,EPI_ISL_978920,EPI_ISL_978921,EPI_ISL_978922,EPI_ISL_978924,EPI_ISL_978926,EPI_ISL_978927,EPI_ISL_978928,EPI_ISL_872394,EPI_ISL_978930,EPI_ISL_978932,EPI_ISL_978934,EPI_ISL_9…	Centre for Dengue Research and AICBU, Department of Immunology and Molecular Medicine	Centre for Dengue Research and AICBU, Department of Immunology and Molecular Medicine	Chandima Jeewandara et al
EPI_ISL_803817,EPI_ISL_803120,EPI_ISL_803430,EPI_ISL_803851,EPI_ISL_803119,EPI_ISL_811145,EPI_ISL_796782	Laboratory of Microbiology, National Reference Lab, Charles Nicolle Hospital; 2-University of Tunis ElManar, Faculty of Medicine of Tunis, LR99ES09, Tunis, Tunisia	Clinical and Experimental Pharmacology Lab, LR16SP02, National Center of Pharmacovigilance, University of Tunis El Manar, Tunis, Tunisia. 2-Neurodegenerative diseases and psychiatric troubles, LR18SP03, Razi Hospital, University of Tunis El Manar, Tunis, Tunisia. 3- Ministry of Health, National Observatory of New and Emerging Diseases, 1006, Tunis, Tunisia	Ilhem Boutiba-Ben Boubaker et al
EPI_ISL_889021	RSIA Kenari Graha Medika	Eijkman Institute for Molecular Biology, Ministry of Research and Technology/National Agency for Research and Innovation	Hidayat Trimarsanto et al
EPI_ISL_830727,EPI_ISL_830728,EPI_ISL_830731,EPI_ISL_830729,EPI_ISL_830733,EPI_ISL_830734,EPI_ISL_830732,EPI_ISL_830735,EPI_ISL_830740,EPI_ISL_830737,EPI_ISL_830736,EPI_ISL_830739,EPI_ISL_930930,EPI_ISL_930962,EPI_ISL_930991,EPI_ISL_931012,EPI_ISL_931125,EPI_ISL_931131,EPI_ISL_931135,EPI_ISL_931278,EPI_ISL_931304,EPI_ISL_931370,EPI_ISL_931395,EPI_ISL_842651,EPI_ISL_831003,EPI_ISL_931283,EPI_ISL_9…	University Hospital Basel, Clinical Virology	University Hospital Basel, Clinical Bacteriology	Tim Roloff et al
EPI_ISL_471541,EPI_ISL_523971	Hospital Geral Santa Marcelina	Instituto Adolfo Lutz, Interdiciplinary Procedures Center, Strategic Laboratory	Claudio Tavares Sacchi et al
EPI_ISL_559334,EPI_ISL_559317,EPI_ISL_559313,EPI_ISL_559359,EPI_ISL_559318,EPI_ISL_559311,EPI_ISL_559304,EPI_ISL_559338,EPI_ISL_559344,EPI_ISL_559351,EPI_ISL_559336,EPI_ISL_559315,EPI_ISL_559345,EPI_ISL_559349,EPI_ISL_559361,EPI_ISL_559325,EPI_ISL_559430,EPI_ISL_559374,EPI_ISL_559408,EPI_ISL_559423,EPI_ISL_559392,EPI_ISL_559647,EPI_ISL_559595,EPI_ISL_559624,EPI_ISL_559550,EPI_ISL_559390,EPI_ISL_5…	Lighthouse Lab in Alderley Park	Wellcome Sanger Institute for the COVID-19 Genomics UK (COG-UK) consortium	The Lighthouse Lab in Alderley Park et al
EPI_ISL_558614,EPI_ISL_558461,EPI_ISL_558462,EPI_ISL_558500,EPI_ISL_558615,EPI_ISL_558613,EPI_ISL_558531,EPI_ISL_558451,EPI_ISL_558552,EPI_ISL_558450,EPI_ISL_558419,EPI_ISL_558534,EPI_ISL_558454,EPI_ISL_558406,EPI_ISL_558420,EPI_ISL_558433,EPI_ISL_558470,EPI_ISL_558449,EPI_ISL_558507,EPI_ISL_558601,EPI_ISL_558588,EPI_ISL_558505,EPI_ISL_558480,EPI_ISL_558475,EPI_ISL_558496,EPI_ISL_558421,EPI_ISL_5…	Lighthouse Lab in Alderley Park	Wellcome Sanger Institute for the COVID-19 Genomics UK (COG-UK) consortium	The Lighthouse Lab in Alderley Park et al
EPI_ISL_557031,EPI_ISL_557046,EPI_ISL_557140,EPI_ISL_557096,EPI_ISL_557067,EPI_ISL_557054,EPI_ISL_557059,EPI_ISL_557128,EPI_ISL_557051,EPI_ISL_557124,EPI_ISL_557060,EPI_ISL_557022,EPI_ISL_557027,EPI_ISL_557024,EPI_ISL_557042,EPI_ISL_557076,EPI_ISL_557148,EPI_ISL_557066,EPI_ISL_557106,EPI_ISL_556994,EPI_ISL_556996,EPI_ISL_557005,EPI_ISL_557157,EPI_ISL_556991,EPI_ISL_557064,EPI_ISL_557057,EPI_ISL_5…	Lighthouse Lab in Alderley Park	Wellcome Sanger Institute for the COVID-19 Genomics UK (COG-UK) consortium	The Lighthouse Lab in Alderley Park et al
EPI_ISL_555940,EPI_ISL_555966,EPI_ISL_555927,EPI_ISL_556371,EPI_ISL_556386,EPI_ISL_555912,EPI_ISL_556334,EPI_ISL_556346,EPI_ISL_556422,EPI_ISL_556347,EPI_ISL_556416,EPI_ISL_556442,EPI_ISL_556367,EPI_ISL_556455,EPI_ISL_556364,EPI_ISL_556320,EPI_ISL_556354,EPI_ISL_556307,EPI_ISL_556312,EPI_ISL_556499,EPI_ISL_556325,EPI_ISL_556420,EPI_ISL_556397,EPI_ISL_556402,EPI_ISL_556315,EPI_ISL_556498,EPI_ISL_5…	Lighthouse Lab in Alderley Park	Wellcome Sanger Institute for the COVID-19 Genomics UK (COG-UK) consortium	The Lighthouse Lab in Alderley Park et al
EPI_ISL_554452,EPI_ISL_554584,EPI_ISL_554614,EPI_ISL_554574,EPI_ISL_554543,EPI_ISL_554564,EPI_ISL_554352,EPI_ISL_554412,EPI_ISL_554536,EPI_ISL_554490,EPI_ISL_554402,EPI_ISL_554502,EPI_ISL_554559,EPI_ISL_554598,EPI_ISL_554544,EPI_ISL_554534,EPI_ISL_554364,EPI_ISL_554443,EPI_ISL_554546,EPI_ISL_554329,EPI_ISL_554555,EPI_ISL_554457,EPI_ISL_554458,EPI_ISL_554427,EPI_ISL_554511,EPI_ISL_554503,EPI_ISL_5…	Lighthouse Lab in Alderley Park	Wellcome Sanger Institute for the COVID-19 Genomics UK (COG-UK) consortium	The Lighthouse Lab in Alderley Park et al
EPI_ISL_552539,EPI_ISL_552608,EPI_ISL_552706,EPI_ISL_552579,EPI_ISL_552669,EPI_ISL_552540,EPI_ISL_552506,EPI_ISL_552476,EPI_ISL_552479,EPI_ISL_552712,EPI_ISL_552508,EPI_ISL_552464,EPI_ISL_552617,EPI_ISL_552607,EPI_ISL_552655,EPI_ISL_552598,EPI_ISL_552574,EPI_ISL_552580,EPI_ISL_552583,EPI_ISL_552679,EPI_ISL_552707,EPI_ISL_552473,EPI_ISL_552666,EPI_ISL_552486,EPI_ISL_552671,EPI_ISL_552703,EPI_ISL_5…	Lighthouse Lab in Alderley Park	Wellcome Sanger Institute for the COVID-19 Genomics UK (COG-UK) consortium	The Lighthouse Lab in Alderley Park et al
EPI_ISL_510527	Unite des virus emergents, UMR190	Unite des virus emergents, UMR190	Baronti et al
EPI_ISL_889013	RS Rawa Lumbu	Eijkman Institute for Molecular Biology, Ministry of Research and Technology/National Agency for Research and Innovation	Iskandar Adnan et al
EPI_ISL_535651,EPI_ISL_535653,EPI_ISL_535655,EPI_ISL_535656,EPI_ISL_535657,EPI_ISL_450800,EPI_ISL_509663,EPI_ISL_509665,EPI_ISL_509679,EPI_ISL_509680,EPI_ISL_509667,EPI_ISL_509681,EPI_ISL_509682,EPI_ISL_509670,EPI_ISL_509675,EPI_ISL_509671,EPI_ISL_509672,EPI_ISL_509673,EPI_ISL_509674,EPI_ISL_509676,EPI_ISL_509678,EPI_ISL_509677,EPI_ISL_509668,EPI_ISL_509664,EPI_ISL_509666,EPI_ISL_535660	AR Dept. of Health-Public Health Lab	Pathogen Discovery, Respiratory Viruses Branch, Division of Viral Diseases, Centers for Disease Control and Prevention	Yan Li et al
EPI_ISL_877585,EPI_ISL_877586,EPI_ISL_877587,EPI_ISL_877588,EPI_ISL_877589,EPI_ISL_877590,EPI_ISL_877591,EPI_ISL_877592,EPI_ISL_877593,EPI_ISL_877594,EPI_ISL_877595,EPI_ISL_877596,EPI_ISL_884291,EPI_ISL_877597,EPI_ISL_877598,EPI_ISL_877599,EPI_ISL_877600,EPI_ISL_877601,EPI_ISL_877602,EPI_ISL_877603,EPI_ISL_877604,EPI_ISL_877605,EPI_ISL_877606,EPI_ISL_877607,EPI_ISL_877608,EPI_ISL_877609,EPI_ISL_8…	Clinical Molecular Microbiology Laboratory, UNC Hospital	Dirk Dittmer	Razia Moorad et al
EPI_ISL_455608,EPI_ISL_455585	Phramongkutklao Hospital	National Institute of Health. Department of medical Sciences, Ministry of Public Health, Thailand	Pilailuk et al
EPI_ISL_861504,EPI_ISL_861505	Cerballiance Provence	CERBA LAB	Delaunay E et al
EPI_ISL_641534	CHU de Nice - Hôpital Archet 16	CNR Virus des Infections Respiratoires - France SUD	Antonin Bal et al
EPI_ISL_696457,EPI_ISL_696486,EPI_ISL_696483,EPI_ISL_696479,EPI_ISL_696502	Hornlee Clinic wc HLC & NHLS/UCT	KRISP, KZN Research Innovation and Sequencing Platform	Arash Iranzadeh et al
EPI_ISL_529032	Central Molecular Microbiology Laboratory and Next Generation Sequencing Reference Laboratory, Clinical and Chemical Pathology Department, Faculty of Medicine, CAIRO UNIVERSITY	Next Generation Sequencing Reference Laboratory, Faculty of Medicine, CAIRO UNIVERSITY and The Center for Genome and Microbiome Research, Faculty of Pharmacy, CAIRO UNIVERSITY	May Sherif Soliman et al
EPI_ISL_447841	FL Bureau of Public Health Laboratories-Tampa	Pathogen Discovery, Respiratory Viruses Branch, Division of Viral Diseases, Centers for Disease Control and Prevention	Krista Queen et al
EPI_ISL_418258,EPI_ISL_418259	Presidio ospedaliero "Santo Spirito"	Istituto Zooprofilattico Sperimentale dell'Abruzzo e Molise "G. Caporale"	Lorusso A et al
EPI_ISL_450485,EPI_ISL_450484,EPI_ISL_450487,EPI_ISL_450486	unknown	Data Science	Carroll et al
EPI_ISL_708529	Secretária Municipal de Saude de Fernandópolis	Instituto Adolfo Lutz, Interdiciplinary Procedures Center, Strategic Laboratory	Claudio Tavares Sacchi et al
EPI_ISL_467946,EPI_ISL_467947,EPI_ISL_467948,EPI_ISL_467949,EPI_ISL_511805,EPI_ISL_511806,EPI_ISL_511807,EPI_ISL_511808,EPI_ISL_511809,EPI_ISL_511810,EPI_ISL_511811,EPI_ISL_511812,EPI_ISL_511813,EPI_ISL_511814,EPI_ISL_511815,EPI_ISL_511816,EPI_ISL_511817,EPI_ISL_511818,EPI_ISL_511819,EPI_ISL_511820,EPI_ISL_511862,EPI_ISL_511821,EPI_ISL_511822,EPI_ISL_511823,EPI_ISL_511824,EPI_ISL_511825,EPI_ISL_5…	Innovative Genomics Institute, UC Berkeley	Innovative Genomics Institute, UC Berkeley	Stacia Wyman et al
EPI_ISL_654869	Pasteur Institute in Ho Chi Minh city	Department of Microbiology and Immunology - Pasteur Institute in Ho Chi Minh city	Phạm Thị Nhung et al
EPI_ISL_861635	Hospital e Maternidade Madre Theodora	Instituto Adolfo Lutz, Interdiciplinary Procedures Center, Strategic Laboratory	Claudio Tavares Sacchi et al
EPI_ISL_524479	Klinik Hirslanden Zürich	Institute of Medical Virology, University of Zurich	Stefan Schmutz et al
EPI_ISL_794747,EPI_ISL_794751	Ospedale Vito Fazzi	Istituto Zooprofilattico Sperimentale della Puglia e della Basilicata	Parisi A. et al
EPI_ISL_420051	Résidence Eleusis	National Reference Center for Viruses of Respiratory Infections, Institut Pasteur, Paris	Mélanie Albert et al
EPI_ISL_490421,EPI_ISL_490422,EPI_ISL_490423,EPI_ISL_490424,EPI_ISL_490425,EPI_ISL_490426,EPI_ISL_490427,EPI_ISL_490428,EPI_ISL_490429,EPI_ISL_490430,EPI_ISL_490431,EPI_ISL_490432,EPI_ISL_490433,EPI_ISL_490434,EPI_ISL_490435,EPI_ISL_490436,EPI_ISL_490438,EPI_ISL_490439,EPI_ISL_507040,EPI_ISL_507041,EPI_ISL_507042,EPI_ISL_507043,EPI_ISL_507044,EPI_ISL_507045,EPI_ISL_507046,EPI_ISL_507047,EPI_ISL_5…	University College London Hospital	COVID-19 Genomics UK (COG-UK) Consortium	Judith Heaney et al
EPI_ISL_920508,EPI_ISL_920509,EPI_ISL_920510,EPI_ISL_920511,EPI_ISL_920512,EPI_ISL_920513,EPI_ISL_920514,EPI_ISL_920515,EPI_ISL_920516,EPI_ISL_920517,EPI_ISL_920518,EPI_ISL_920519,EPI_ISL_920520,EPI_ISL_920521,EPI_ISL_920522,EPI_ISL_920523,EPI_ISL_920524,EPI_ISL_920527,EPI_ISL_920528,EPI_ISL_920529,EPI_ISL_920531,EPI_ISL_920532,EPI_ISL_920533,EPI_ISL_920534,EPI_ISL_920536,EPI_ISL_920537,EPI_ISL_9…	University College London Hospital	COVID-19 Genomics UK (COG-UK) Consortium	Judith Heaney et al
EPI_ISL_914809	AREA DE SALUD OREAMUNO-PACAYAS-TIERRA BLANCA	Inciensa, Instituto Costarricense de Investigación y Enseñanza en Nutrición y Salud	Francisco Duarte et al
EPI_ISL_524719,EPI_ISL_586515,EPI_ISL_512061,EPI_ISL_514598	B.J. Medical College and Civil hospital, Ahmedabad	Gujarat Biotechnology Research Centre	Nidhi Patel et al
EPI_ISL_537279,EPI_ISL_537285,EPI_ISL_537254	Virology Department, Sheffield Teaching Hospitals NHS Foundation Trust / Department of Infection, Immunity and Cardiovascular Disease, The Medical School, University of Sheffield	Wellcome Sanger Institute for the COVID-19 Genomics UK (COG-UK) Consortium	Thushan de Silva et al
EPI_ISL_421500,EPI_ISL_420041,EPI_ISL_420049,EPI_ISL_420050,EPI_ISL_420056,EPI_ISL_420057,EPI_ISL_421509,EPI_ISL_421510,EPI_ISL_421511,EPI_ISL_428353,EPI_ISL_443316,EPI_ISL_443309,EPI_ISL_428359,EPI_ISL_428360	CH Compiègne Laboratoire de Biologie	National Reference Center for Viruses of Respiratory Infections, Institut Pasteur, Paris	Mélanie Albert et al
EPI_ISL_434661,EPI_ISL_434662,EPI_ISL_434664,EPI_ISL_434673	Omtanken Grimmered	The Public Health Agency of Sweden	Bernd Sengpiel et al
EPI_ISL_475030,EPI_ISL_476874,EPI_ISL_495071	Department of MicroBiology, Government Medical College, Surat	Gujarat Biotechnology Research Centre	Janvi Raval et al
EPI_ISL_804825,EPI_ISL_804815,EPI_ISL_804826,EPI_ISL_804819,EPI_ISL_804827,EPI_ISL_804824,EPI_ISL_804823,EPI_ISL_804822,EPI_ISL_804828,EPI_ISL_804829,EPI_ISL_804818,EPI_ISL_804817,EPI_ISL_804821,EPI_ISL_804830,EPI_ISL_804814,EPI_ISL_804820,EPI_ISL_804816	DB Diagnosticos do Brasil	Laboratório de Parasitologia Médica - Instituto de Medicina Tropical - Universidade de São Paulo	Nuno Faria et al
EPI_ISL_511941,EPI_ISL_511930,EPI_ISL_511931,EPI_ISL_511932,EPI_ISL_511933,EPI_ISL_511934,EPI_ISL_511935,EPI_ISL_511936,EPI_ISL_511937,EPI_ISL_511938,EPI_ISL_511939,EPI_ISL_511940	Government Medical College	National Institute of Biomedical Genomics - DBT's PAN-INDIA 1000 SARS--CoV-2 RNA Genome Sequencing Consortium	Arindam Maitra et al
EPI_ISL_864580	National Institute of Public Health - National Institute of Hygiene	National Institute of Public Health - National Institute of Hygiene, DNA Sequencing and Synthesis Facility (oligo.pl) - Institute of Biochemistry and Biophysics PAS	Wołkowicz Tomasz et al
EPI_ISL_854745,EPI_ISL_854746,EPI_ISL_854747,EPI_ISL_877563,EPI_ISL_480691,EPI_ISL_480694,EPI_ISL_480695,EPI_ISL_480696,EPI_ISL_480697,EPI_ISL_521860,EPI_ISL_521861,EPI_ISL_521862,EPI_ISL_779404,EPI_ISL_779406,EPI_ISL_779408,EPI_ISL_779409,EPI_ISL_779410,EPI_ISL_779413,EPI_ISL_812423	Royal Darwin Hospital Pathology	MDU-PHL	Meumann et al
EPI_ISL_913446	Laboratorio Genzano - ASL RM 6	INMI Lazzaro Spallanzani IRCCS	Emanuela Giombini et al
EPI_ISL_424342	INMI Lazzaro Spallanzani IRCCS	Laboratory of Virology, INMI Lazzaro Spallanzani IRCCS	Concetta Castilletti et al
EPI_ISL_459962,EPI_ISL_459964,EPI_ISL_459963,EPI_ISL_457750	Centogene AG	Centogene AG	Prof. Dr. Peter Bauer et al
EPI_ISL_825159,EPI_ISL_825166,EPI_ISL_825160,EPI_ISL_825161,EPI_ISL_825162,EPI_ISL_825168,EPI_ISL_825167,EPI_ISL_825163,EPI_ISL_825164,EPI_ISL_825169,EPI_ISL_825165,EPI_ISL_825171,EPI_ISL_825172	Robert Koch Institute, ZBS1 Highly Pathogenic Viruses, Berlin, Germany	Robert Koch Institute, ZBS1 Highly Pathogenic Viruses & Bioinformatics MF1, Berlin, Germany	Annika Brinkmann et al
EPI_ISL_417877,EPI_ISL_417878,EPI_ISL_417879,EPI_ISL_417880	Institute of Virology, Biomedical Research Center of the Slovak Academy of Sciences, Bratislava; Public Health Authority of the Slovak Republic, Bratislava	Institute of Virology, Biomedical Research Center of the Slovak Academy of Sciences, Bratislava; Comenius University Science Park, Bratislava	Monika Slávikova et al
EPI_ISL_413017,EPI_ISL_413018,EPI_ISL_413514,EPI_ISL_413516	Department of Microbiology, Institute for Viral Diseases, College of Medicine, Korea University	Department of Microbiology, Institute for Viral Diseases, College of Medicine, Korea University	Changmin Kang et al
EPI_ISL_876742,EPI_ISL_794750,EPI_ISL_918408,EPI_ISL_918409	Ospedale Santa Caterina Novella	Istituto Zooprofilattico Sperimentale della Puglia e della Basilicata	Parisi A. et al
EPI_ISL_590692	Government Hospital,Veraval	Gujarat Biotechnology Research Centre	Zarna Patel et al
EPI_ISL_419301,EPI_ISL_419302,EPI_ISL_419303,EPI_ISL_419304,EPI_ISL_419305,EPI_ISL_419306,EPI_ISL_419307,EPI_ISL_419308,EPI_ISL_479805,EPI_ISL_479806,EPI_ISL_479807,EPI_ISL_479808,EPI_ISL_479928,EPI_ISL_479929,EPI_ISL_479930,EPI_ISL_479931,EPI_ISL_684148,EPI_ISL_479932,EPI_ISL_479933,EPI_ISL_684149,EPI_ISL_479934,EPI_ISL_479935,EPI_ISL_684881,EPI_ISL_684882,EPI_ISL_684883,EPI_ISL_684884,EPI_ISL_6…	Saitama Prefectural Institute of Public Health	Pathogen Genomics Center, National Institute of Infectious Diseases	Tsuyoshi Sekizuka et al
EPI_ISL_539559,EPI_ISL_539560	Hospital Campo Arañuelo	Instituto de Salud Carlos III	Iglesias-Caballero et al
EPI_ISL_569620	McCrossan Boys Ranch	South Dakota Public Health Laboratory	Matt Plumb et al
EPI_ISL_434538	COOPESAIN	Inciensa, Instituto Costarricense de Investigación y Enseñanza en Nutrición y Salud	Francisco Duarte et al
EPI_ISL_420043,EPI_ISL_420061	CMIP	National Reference Center for Viruses of Respiratory Infections, Institut Pasteur, Paris	Mélanie Albert et al
EPI_ISL_978540	Centre de Virologie des Maladies infectueuses Tropicales	Functional Genomic Platform UATRS-biology, CNRST	Abdelilah LARAQUI et al
EPI_ISL_640061,EPI_ISL_640051,EPI_ISL_640040,EPI_ISL_640052,EPI_ISL_640053,EPI_ISL_640055,EPI_ISL_640043,EPI_ISL_640045,EPI_ISL_640067,EPI_ISL_700493,EPI_ISL_700507,EPI_ISL_640111,EPI_ISL_640112,EPI_ISL_640119,EPI_ISL_640120,EPI_ISL_640122,EPI_ISL_640128,EPI_ISL_640129,EPI_ISL_640130,EPI_ISL_640084,EPI_ISL_700534,EPI_ISL_700577,EPI_ISL_640131,EPI_ISL_640132,EPI_ISL_640133,EPI_ISL_640134,EPI_ISL_6…	Groote Schuur Hospital wc GSH	NHLS/UCT	Arash Iranzadeh et al
EPI_ISL_640044	District 6 CDC wc DSI	NHLS/UCT	Arash Iranzadeh et al
EPI_ISL_751664,EPI_ISL_751718,EPI_ISL_751611,EPI_ISL_751665,EPI_ISL_751744,EPI_ISL_751542,EPI_ISL_903688,EPI_ISL_903672,EPI_ISL_903872,EPI_ISL_903671,EPI_ISL_903819,EPI_ISL_903717,EPI_ISL_903668	SC Dept of Health and Env. Control-Bureau of Laboratories	Genomics and Discovery, Respiratory Viruses Branch, Division of Viral Diseases, Centers for Disease Control and Prevention	Krista Queen et al
EPI_ISL_909954	AZ Delta	AZ Delta	Geert Marten et al
EPI_ISL_471546	AMA DR Jose Soares Hungria	Instituto Adolfo Lutz, Interdiciplinary Procedures Center, Strategic Laboratory	Claudio Tavares Sacchi et al
EPI_ISL_479777,EPI_ISL_479778,EPI_ISL_479779,EPI_ISL_479780,EPI_ISL_479781,EPI_ISL_479782,EPI_ISL_479783,EPI_ISL_479784,EPI_ISL_479785,EPI_ISL_479786,EPI_ISL_479787,EPI_ISL_479788,EPI_ISL_479789	Breuer Lab, UCL	Breuer Lab, UCL	Breuer Lab et al
EPI_ISL_459108,EPI_ISL_534634	NHSGGC West of Scotland Specialist Virology Centre / MRC-University of Glasgow Centre for Virus Research	Wellcome Sanger Institute for the COVID-19 Genomics UK (COG-UK) Consortium	Ana da Silva Filipe et al
EPI_ISL_766573,EPI_ISL_766572,EPI_ISL_766571,EPI_ISL_977203,EPI_ISL_977204,EPI_ISL_977205,EPI_ISL_977206	ULSS 7 Pedemontana - Distretto 1	Istituto Zooprofilattico Sperimentale delle Venezie	Adelaide Milani et al
EPI_ISL_812250	Invenimus AG	Institute of Medical Virology, University of Zurich	Stefan Schmutz et al
EPI_ISL_632287	Environmental and Global Health, University of Florida	Environmental and Global Health, University of Florida	Alam et al
EPI_ISL_455026,EPI_ISL_469030	Government Medical College, Vadodara	Gujarat Biotechnology Research Centre	Monika Gandhi et al
EPI_ISL_482468	Laboratorio de Referencia Nacional de Virus Respiratorios. Instituto Nacional de Salud Peru	Laboratorio de Referencia Nacional de Biotecnologia y Biologia Molecular. Instituto Nacional de Salud Peru	Carlos Padilla Rojas et al
EPI_ISL_406862	Charité Universitätsmedizin Berlin, Institute of Virology; Institut für Mikrobiologie der Bundeswehr, Munich	Charité Universitätsmedizin Berlin, Institute of Virology	Victor M Corman et al
EPI_ISL_861420,EPI_ISL_872089,EPI_ISL_872097	Instituto de Diagnostico y Referencia Epidemiologicos (INDRE)	Instituto de Diagnostico y Referencia Epidemiologicos (INDRE)	Abril Rodriguez-Maldonado et al
EPI_ISL_860261,EPI_ISL_860280,EPI_ISL_860282,EPI_ISL_860283,EPI_ISL_906798,EPI_ISL_906799,EPI_ISL_906800,EPI_ISL_906801,EPI_ISL_906802,EPI_ISL_906803,EPI_ISL_965008,EPI_ISL_965009,EPI_ISL_965010,EPI_ISL_965013,EPI_ISL_964967,EPI_ISL_965014,EPI_ISL_964956,EPI_ISL_964957,EPI_ISL_964991,EPI_ISL_420151,EPI_ISL_775312,EPI_ISL_635145,EPI_ISL_775313,EPI_ISL_635182,EPI_ISL_635142,EPI_ISL_775319,EPI_ISL_6…	Nordland Hospital - Bodo, Laboratory Department, Molecular Biology Unit	Norwegian Institute of Public Health, Department of Virology	Kathrine Stene-Johansen et al
EPI_ISL_745156	SAS Saldanha	National Health Laboratory Service (NHLS), Tygerberg	Susan Engelbrecht et al
EPI_ISL_548147,EPI_ISL_548148,EPI_ISL_548149,EPI_ISL_548150,EPI_ISL_548151,EPI_ISL_548152,EPI_ISL_548153,EPI_ISL_548154,EPI_ISL_548155,EPI_ISL_548156,EPI_ISL_548157,EPI_ISL_548158,EPI_ISL_548159,EPI_ISL_548160,EPI_ISL_548161,EPI_ISL_548162,EPI_ISL_548163,EPI_ISL_548164,EPI_ISL_548165,EPI_ISL_548166,EPI_ISL_548167,EPI_ISL_548168,EPI_ISL_548169,EPI_ISL_548170,EPI_ISL_548171,EPI_ISL_548172,EPI_ISL_5…	Laboratoire de Virologie, HUG	Swiss National Reference Centre for Influenza	LAUBSCHER F. et al
EPI_ISL_751697,EPI_ISL_751723,EPI_ISL_751574,EPI_ISL_751698,EPI_ISL_751760,EPI_ISL_751699,EPI_ISL_751652,EPI_ISL_751764,EPI_ISL_751765,EPI_ISL_751731,EPI_ISL_903593,EPI_ISL_903640,EPI_ISL_903679,EPI_ISL_903639,EPI_ISL_903565,EPI_ISL_903697	AR Dept. of Health-Public Health Lab	Genomics and Discovery, Respiratory Viruses Branch, Division of Viral Diseases, Centers for Disease Control and Prevention	Krista Queen et al
EPI_ISL_678262,EPI_ISL_682315,EPI_ISL_682316,EPI_ISL_684036,EPI_ISL_682301,EPI_ISL_681309,EPI_ISL_682300,EPI_ISL_681310,EPI_ISL_681307,EPI_ISL_682314,EPI_ISL_681306,EPI_ISL_682313,EPI_ISL_682312,EPI_ISL_681305,EPI_ISL_681304,EPI_ISL_682311,EPI_ISL_682299,EPI_ISL_681308,EPI_ISL_682302,EPI_ISL_681303,EPI_ISL_681302,EPI_ISL_678263,EPI_ISL_681319,EPI_ISL_682317,EPI_ISL_681318,EPI_ISL_678264,EPI_ISL_6…	Communicable Disease Laboratory, Public Health Directorate	Communicable Disease Laboratory, Public Health Directorate	Alwasti et al
EPI_ISL_411952,EPI_ISL_411953	NHC Key laboratory of Enteric Pathogenic Microbiology, Institute of Pathogenic Microbiology	Jiangsu Provincial Center for Disease Control & Prevention	Kangchen Zhao et al
EPI_ISL_483851,EPI_ISL_483869	Department of Microbiology, Government Medical College, Surat	Gujarat Biotechnology Research Centre	Raghawendra Kumar et al
EPI_ISL_890237	Virology, International Centre for Diarrhoeal Disease Research, Bangladesh (ICDDR,B)	International Centre for Diarrhoeal Disease Research (ICDDR,B)	Hossain et al
EPI_ISL_486887	National Influenza Center, Bahrain	National Influenza Center, Bahrain	Zaed et al
EPI_ISL_483824	GMERS Medical College Himmatnagar	Gujarat Biotechnology Research Centre	Himanshu Khatri et al
EPI_ISL_831645,EPI_ISL_831646,EPI_ISL_831660,EPI_ISL_831681,EPI_ISL_831683,EPI_ISL_831685,EPI_ISL_831688,EPI_ISL_831689,EPI_ISL_831892,EPI_ISL_831898,EPI_ISL_831913,EPI_ISL_831938,EPI_ISL_831939,EPI_ISL_831940,EPI_ISL_832009,EPI_ISL_832010,EPI_ISL_832011,EPI_ISL_832012,EPI_ISL_832013,EPI_ISL_831678	Laboratório de Microbiologia Molecular - Universidade FEEVALE	Universidade Federal de Ciências da Saúde de Porto Alegre	Vinícius Bonetti Franceschi et al
EPI_ISL_965840,EPI_ISL_965841,EPI_ISL_965842,EPI_ISL_965843,EPI_ISL_965844,EPI_ISL_965845,EPI_ISL_965846,EPI_ISL_965847,EPI_ISL_965848,EPI_ISL_965849,EPI_ISL_965850,EPI_ISL_965851,EPI_ISL_965852,EPI_ISL_965853,EPI_ISL_965854	GA Department of Public Health	GA Department of Public Health	Stacy Reeves et al
EPI_ISL_475564,EPI_ISL_469066,EPI_ISL_475543,EPI_ISL_476136,EPI_ISL_469070	Surbrunns VC	The Public Health Agency of Sweden	Oskar Karlsson Lindsjo et al
EPI_ISL_414598	Servicio Microbiologia, Hospital Clinico Universitario, Valencia	Sequencing and Bioinformatics Service and Molecular Epidemiology Research Group. FISABIO-Public Health.	David Navarro et al
EPI_ISL_594456	Georgia Public Health Laboratory	Pathogen Discovery, Respiratory Viruses Branch, Division of Viral Diseases, Centers for Disease Control and Prevention	Ying Tao et al
EPI_ISL_594447,EPI_ISL_594448,EPI_ISL_594449,EPI_ISL_594450,EPI_ISL_594451,EPI_ISL_594452,EPI_ISL_594453,EPI_ISL_594454,EPI_ISL_594459	Washington State Public Health Laboratories	Pathogen Discovery, Respiratory Viruses Branch, Division of Viral Diseases, Centers for Disease Control and Prevention	Ying Tao et al
EPI_ISL_882652	Laboratory of Microbiology and Virology, Ospedale Amedeo di Savoia, ASL "Città di Torino"	U.O. Genomics, S.S. Genetics and Advanced Omics Techniques, Istituto Zooprofilattico Sperimentale del Piemonte, Liguria e Valle d'Aosta	Chiara Beltramo et al
EPI_ISL_593935	Sentinelles, Plessis-Trevise	National Reference Center for Viruses of Respiratory Infections, Institut Pasteur, Paris	Sylvie Behillil et al
EPI_ISL_514065,EPI_ISL_514067,EPI_ISL_514068,EPI_ISL_514071,EPI_ISL_514072,EPI_ISL_514075,EPI_ISL_514076,EPI_ISL_514080,EPI_ISL_514081,EPI_ISL_514082,EPI_ISL_514083,EPI_ISL_514085,EPI_ISL_514086,EPI_ISL_514087,EPI_ISL_514089	Navy and Marine Corps Public Health Center	Pathogen Discovery, Respiratory Viruses Branch, Division of Viral Diseases, Centers for Disease Control and Prevention	Krista Queen et al
EPI_ISL_407193	Korea Centers for Disease Control & Prevention (KCDC) Center for Laboratory Control of Infectious Diseases Division of Viral Diseases	Korea Centers for Disease Control & Prevention (KCDC) Center for Laboratory Control of Infectious Diseases Division of Viral Diseases	Jeong-Min Kim et al
EPI_ISL_509695,EPI_ISL_509696,EPI_ISL_509697,EPI_ISL_509698,EPI_ISL_509699,EPI_ISL_509700,EPI_ISL_509701,EPI_ISL_509702,EPI_ISL_509703	Guatemala Ministry of Public Health	Pathogen Discovery, Respiratory Viruses Branch, Division of Viral Diseases, Centers for Disease Control and Prevention	Ying Tao et al
EPI_ISL_444612	QML Pathology	Public Health Virology Laboratory	Bixing Huang et al
EPI_ISL_414414,EPI_ISL_417031,EPI_ISL_418802,EPI_ISL_418803,EPI_ISL_418804,EPI_ISL_418807,EPI_ISL_418808,EPI_ISL_444611,EPI_ISL_444793	Pathology Queensland	Public Health Virology Laboratory	Bixing Huang et al
EPI_ISL_825028,EPI_ISL_825029,EPI_ISL_825030,EPI_ISL_825031,EPI_ISL_825032	Infectious Diseases, NC SLPH COVID-19 Response Team	Infectious Diseases, NC SLPH COVID-19 Response Team	Miller et al
EPI_ISL_794653	LSP DEL TOLIMA	Instituto Nacional de Salud - Dirección de Investigación en Salud Pública	Katherine Laiton-Donato et al
EPI_ISL_539523	Hospital General de Segovia	Instituto de Salud Carlos III	Iglesias-Caballero et al
EPI_ISL_572962,EPI_ISL_572963,EPI_ISL_572964,EPI_ISL_572965,EPI_ISL_572966,EPI_ISL_572893,EPI_ISL_572958,EPI_ISL_572894,EPI_ISL_572895,EPI_ISL_572857,EPI_ISL_572967,EPI_ISL_572968,EPI_ISL_572969,EPI_ISL_572970,EPI_ISL_572858,EPI_ISL_572971,EPI_ISL_572972,EPI_ISL_572849,EPI_ISL_572973,EPI_ISL_572974,EPI_ISL_572975,EPI_ISL_572976,EPI_ISL_572977,EPI_ISL_572978,EPI_ISL_572979,EPI_ISL_572980,EPI_ISL_5…	Oxford Viromics, NDM, University of Oxford; Oxford University Hospitals; Basingstoke and North Hampshire Hospital	COVID-19 Genomics UK (COG-UK) Consortium	Tanya Golubchik et al
EPI_ISL_741103,EPI_ISL_741104,EPI_ISL_741105,EPI_ISL_741106,EPI_ISL_741107,EPI_ISL_741108,EPI_ISL_741109,EPI_ISL_741110,EPI_ISL_741111,EPI_ISL_741112,EPI_ISL_741113,EPI_ISL_741114,EPI_ISL_741115,EPI_ISL_741116,EPI_ISL_741117,EPI_ISL_741118,EPI_ISL_741119,EPI_ISL_741120,EPI_ISL_741121,EPI_ISL_741122,EPI_ISL_741123,EPI_ISL_741124,EPI_ISL_741125,EPI_ISL_741126,EPI_ISL_741127,EPI_ISL_741128,EPI_ISL_7…	Oxford Viromics, NDM, University of Oxford; Oxford University Hospitals; Basingstoke and North Hampshire Hospital	COVID-19 Genomics UK (COG-UK) Consortium	Tanya Golubchik et al
EPI_ISL_741392,EPI_ISL_741393,EPI_ISL_741394,EPI_ISL_704885,EPI_ISL_706245,EPI_ISL_706246,EPI_ISL_706247,EPI_ISL_706248,EPI_ISL_706249,EPI_ISL_706250,EPI_ISL_706251,EPI_ISL_705484,EPI_ISL_706252,EPI_ISL_706253,EPI_ISL_706254,EPI_ISL_706255,EPI_ISL_705485,EPI_ISL_706256,EPI_ISL_706257,EPI_ISL_706258,EPI_ISL_706259,EPI_ISL_706260,EPI_ISL_741395,EPI_ISL_741396,EPI_ISL_741397,EPI_ISL_741398,EPI_ISL_7…	Oxford Viromics, NDM, University of Oxford; Oxford University Hospitals; Basingstoke and North Hampshire Hospital	COVID-19 Genomics UK (COG-UK) Consortium	Tanya Golubchik et al
EPI_ISL_479122,EPI_ISL_479123,EPI_ISL_479124,EPI_ISL_479125,EPI_ISL_479126,EPI_ISL_479127,EPI_ISL_479129,EPI_ISL_479130,EPI_ISL_479131,EPI_ISL_479132,EPI_ISL_479133,EPI_ISL_479134,EPI_ISL_479135,EPI_ISL_479136,EPI_ISL_479137,EPI_ISL_479138,EPI_ISL_479140,EPI_ISL_479141,EPI_ISL_479142,EPI_ISL_479143,EPI_ISL_479144,EPI_ISL_479145,EPI_ISL_479146,EPI_ISL_479147,EPI_ISL_479148,EPI_ISL_479149,EPI_ISL_4…	Oxford Viromics, NDM, University of Oxford; Oxford University Hospitals; Basingstoke and North Hampshire Hospital	COVID-19 Genomics UK (COG-UK) Consortium	Tanya Golubchik et al
EPI_ISL_867058,EPI_ISL_950999,EPI_ISL_867059,EPI_ISL_867060,EPI_ISL_951000,EPI_ISL_951002,EPI_ISL_951003,EPI_ISL_951004,EPI_ISL_951005,EPI_ISL_951006,EPI_ISL_951007,EPI_ISL_951008,EPI_ISL_867061,EPI_ISL_951009,EPI_ISL_951010,EPI_ISL_867062,EPI_ISL_867063,EPI_ISL_867064,EPI_ISL_951011,EPI_ISL_951012,EPI_ISL_951013,EPI_ISL_867065,EPI_ISL_867066,EPI_ISL_951014,EPI_ISL_951015,EPI_ISL_951016,EPI_ISL_9…	Oxford Viromics, NDM, University of Oxford; Oxford University Hospitals; Basingstoke and North Hampshire Hospital	COVID-19 Genomics UK (COG-UK) Consortium	Tanya Golubchik et al
EPI_ISL_595763,EPI_ISL_595764,EPI_ISL_595765,EPI_ISL_595767,EPI_ISL_595768,EPI_ISL_595769,EPI_ISL_595770,EPI_ISL_595771,EPI_ISL_595772,EPI_ISL_595773,EPI_ISL_595774,EPI_ISL_595776,EPI_ISL_595777,EPI_ISL_595778,EPI_ISL_595779,EPI_ISL_595780,EPI_ISL_595781,EPI_ISL_595782,EPI_ISL_595783,EPI_ISL_595784,EPI_ISL_595785,EPI_ISL_595786,EPI_ISL_595787,EPI_ISL_595788,EPI_ISL_595789,EPI_ISL_595790,EPI_ISL_5…	Oxford Viromics, NDM, University of Oxford; Oxford University Hospitals; Basingstoke and North Hampshire Hospital	COVID-19 Genomics UK (COG-UK) Consortium	Tanya Golubchik et al
EPI_ISL_727841,EPI_ISL_727842,EPI_ISL_727843,EPI_ISL_741889,EPI_ISL_741890,EPI_ISL_741891,EPI_ISL_741892,EPI_ISL_741893,EPI_ISL_741894,EPI_ISL_741895,EPI_ISL_741896,EPI_ISL_741897,EPI_ISL_741898,EPI_ISL_741899,EPI_ISL_741900,EPI_ISL_741901,EPI_ISL_741902,EPI_ISL_741903,EPI_ISL_741904,EPI_ISL_741905,EPI_ISL_741906,EPI_ISL_741907,EPI_ISL_727844,EPI_ISL_741908,EPI_ISL_741909,EPI_ISL_741910,EPI_ISL_7…	Oxford Viromics, NDM, University of Oxford; Oxford University Hospitals; Basingstoke and North Hampshire Hospital	COVID-19 Genomics UK (COG-UK) Consortium	Tanya Golubchik et al
EPI_ISL_584167,EPI_ISL_584188,EPI_ISL_584189,EPI_ISL_584190,EPI_ISL_584192,EPI_ISL_584196,EPI_ISL_584197,EPI_ISL_584199,EPI_ISL_584207,EPI_ISL_584209,EPI_ISL_584210,EPI_ISL_584211,EPI_ISL_584217,EPI_ISL_584218,EPI_ISL_584219,EPI_ISL_584220,EPI_ISL_584221,EPI_ISL_584222,EPI_ISL_584223,EPI_ISL_584224,EPI_ISL_584225,EPI_ISL_584226,EPI_ISL_584227,EPI_ISL_584228,EPI_ISL_584229,EPI_ISL_584230,EPI_ISL_5…	Virology Department, Sheffield Teaching Hospitals NHS Foundation Trust/Department of Infection, Immunity and Cardiovascular Disease, The Medical School, University of Sheffield	COVID-19 Genomics UK (COG-UK) Consortium	Thushan de Silva et al
EPI_ISL_741972,EPI_ISL_816343,EPI_ISL_816344,EPI_ISL_868449,EPI_ISL_924172,EPI_ISL_924173,EPI_ISL_741973,EPI_ISL_816345,EPI_ISL_727896,EPI_ISL_868451,EPI_ISL_816346,EPI_ISL_868452,EPI_ISL_924177,EPI_ISL_816348,EPI_ISL_816350,EPI_ISL_842237,EPI_ISL_816351,EPI_ISL_816352,EPI_ISL_727898,EPI_ISL_868453,EPI_ISL_816353,EPI_ISL_924179,EPI_ISL_816354,EPI_ISL_706977,EPI_ISL_816355,EPI_ISL_816356,EPI_ISL_7…	Virology Department, Sheffield Teaching Hospitals NHS Foundation Trust/Department of Infection, Immunity and Cardiovascular Disease, The Medical School, University of Sheffield	COVID-19 Genomics UK (COG-UK) Consortium	Thushan de Silva et al
EPI_ISL_727984,EPI_ISL_842331,EPI_ISL_868669,EPI_ISL_742095,EPI_ISL_868670,EPI_ISL_742096,EPI_ISL_924382,EPI_ISL_868671,EPI_ISL_868672,EPI_ISL_742097,EPI_ISL_868673,EPI_ISL_924383,EPI_ISL_924384,EPI_ISL_924385,EPI_ISL_842332,EPI_ISL_868674,EPI_ISL_868675,EPI_ISL_868676,EPI_ISL_742098,EPI_ISL_742099,EPI_ISL_742100,EPI_ISL_868677,EPI_ISL_924386,EPI_ISL_924387,EPI_ISL_727985,EPI_ISL_868678,EPI_ISL_8…	Virology Department, Sheffield Teaching Hospitals NHS Foundation Trust/Department of Infection, Immunity and Cardiovascular Disease, The Medical School, University of Sheffield	COVID-19 Genomics UK (COG-UK) Consortium	Thushan de Silva et al
EPI_ISL_484476,EPI_ISL_638885,EPI_ISL_573717,EPI_ISL_448869,EPI_ISL_540742,EPI_ISL_680157,EPI_ISL_535065,EPI_ISL_507169,EPI_ISL_475413,EPI_ISL_484477,EPI_ISL_475414,EPI_ISL_490614,EPI_ISL_924422,EPI_ISL_611681,EPI_ISL_442037,EPI_ISL_475415,EPI_ISL_479234,EPI_ISL_493691,EPI_ISL_442038,EPI_ISL_462037,EPI_ISL_442039,EPI_ISL_442040,EPI_ISL_585034,EPI_ISL_475416,EPI_ISL_611661,EPI_ISL_573718,EPI_ISL_4…	Virology Department, Sheffield Teaching Hospitals NHS Foundation Trust/Department of Infection, Immunity and Cardiovascular Disease, The Medical School, University of Sheffield	COVID-19 Genomics UK (COG-UK) Consortium	Thushan de Silva et al
EPI_ISL_613405,EPI_ISL_727997,EPI_ISL_535100,EPI_ISL_479279,EPI_ISL_493735,EPI_ISL_572433,EPI_ISL_585085,EPI_ISL_611781,EPI_ISL_490645,EPI_ISL_442509,EPI_ISL_442510,EPI_ISL_613406,EPI_ISL_493736,EPI_ISL_448915,EPI_ISL_484518,EPI_ISL_457684,EPI_ISL_479280,EPI_ISL_453772,EPI_ISL_479281,EPI_ISL_585086,EPI_ISL_453773,EPI_ISL_585087,EPI_ISL_559946,EPI_ISL_442511,EPI_ISL_442513,EPI_ISL_535101,EPI_ISL_7…	Virology Department, Sheffield Teaching Hospitals NHS Foundation Trust/Department of Infection, Immunity and Cardiovascular Disease, The Medical School, University of Sheffield	COVID-19 Genomics UK (COG-UK) Consortium	Thushan de Silva et al
EPI_ISL_593481,EPI_ISL_593490,EPI_ISL_593491,EPI_ISL_593492,EPI_ISL_593493,EPI_ISL_593494,EPI_ISL_593495,EPI_ISL_593496,EPI_ISL_593497,EPI_ISL_593498,EPI_ISL_593499,EPI_ISL_593501,EPI_ISL_593502,EPI_ISL_593503,EPI_ISL_593504,EPI_ISL_593506,EPI_ISL_593507,EPI_ISL_593483,EPI_ISL_593508,EPI_ISL_593509,EPI_ISL_593511,EPI_ISL_593512,EPI_ISL_593513,EPI_ISL_593514,EPI_ISL_593515,EPI_ISL_593517,EPI_ISL_5…	Eastern Ontario Regional Laboratory Association	McMaster University	Leanne Mortimer et al
EPI_ISL_495032,EPI_ISL_495050	GMERS Medical College & Hospital, Gotri, Vadodara	Gujarat Biotechnology Research Centre	Varsha Godbole et al
EPI_ISL_861503	Cerballiance Alpes Durance	CERBA LAB	Dyen P et al
EPI_ISL_418267	Microbiology and Immunology department, Pasteur institute in Ho Chi Minh city	Microbiology and Immunology department, Pasteur institute in Ho Chi Minh city	Nguyen et al
EPI_ISL_576147,EPI_ISL_576146,EPI_ISL_576148,EPI_ISL_576149	Department of Respiratory & Other Viral Infections of L.V. Gromashevsky Institute of Epidemiology & Infectious Diseases NAMS of Ukraine	Department of Respiratory & Other Viral Infections of L.V. Gromashevsky Institute of Epidemiology & Infectious Diseases NAMS of Ukraine, JSC "Farmak"	Alla Mironenko et al
EPI_ISL_755587	Infection and Immunology, Translational Health Science and Technology Institute	Infection and Immunology, Translational Health Science and Technology Institute	Kumar et al
EPI_ISL_475536,EPI_ISL_475541	Follinge Halsocentral	The Public Health Agency of Sweden	Oskar Karlsson Lindsjo et al
EPI_ISL_961093	Ospedale SS Annunziata	Istituto Zooprofilattico Sperimentale dell’Abruzzo e Molise “G. Caporale”	Lorusso A et al
EPI_ISL_413600	Centre for Infectious Diseases and Microbiology - Public Health	NSW Health Pathology - Institute of Clinical Pathology and Medical Research; Westmead Hospital; University of Sydney	Gall et al
EPI_ISL_603024,EPI_ISL_603027,EPI_ISL_603038	Santa Casa de Misericordia de Araçatuba	Instituto Adolfo Lutz, Interdiciplinary Procedures Center, Strategic Laboratory	Claudio Tavares Sacchi et al
EPI_ISL_641551,EPI_ISL_641552,EPI_ISL_641553,EPI_ISL_660373,EPI_ISL_660374,EPI_ISL_660375,EPI_ISL_660376,EPI_ISL_660377,EPI_ISL_660665,EPI_ISL_660666,EPI_ISL_641554,EPI_ISL_660667,EPI_ISL_660668,EPI_ISL_660669,EPI_ISL_641555,EPI_ISL_660670,EPI_ISL_660671	CHU Toulouse	CNR Virus des Infections Respiratoires - France SUD	Antonin Bal et al
EPI_ISL_754180	Department for Virology, Molecular Biology and Genome Research, R. G. Lugar Center for Public Health Research, National Center for Disease Control and Public Health (NCDC) of Georgia.	Department for Virology, Molecular Biology and Genome Research, R. G. Lugar Center for Public Health Research, National Center for Disease Control and Public Health (NCDC) of Georgia.	Salome Javashvili et al
EPI_ISL_955158,EPI_ISL_955159,EPI_ISL_955160,EPI_ISL_955161,EPI_ISL_955162,EPI_ISL_955163,EPI_ISL_955164,EPI_ISL_955165,EPI_ISL_955166,EPI_ISL_955168,EPI_ISL_955167	Institute for Biocides and Medical Ecology	Institute of microbiology and Immunology, Faculty of Medicine, University of Belgrade	Knezevic et al
EPI_ISL_759861,EPI_ISL_759862,EPI_ISL_759863,EPI_ISL_759864,EPI_ISL_759865,EPI_ISL_759860	Molecular, ProgenaBiome	Molecular, ProgenaBiome	Papoutsis et al
EPI_ISL_778865,EPI_ISL_778866,EPI_ISL_778842	Clinical Pathology Labs	Centers for Disease Control and Prevention Division of Viral Diseases, Pathogen Discovery	Ying Tao Yan Li Jing Zhang Krista Queen Anna Uehara Peter Cook Clinton R. Paden Haibin Wang Suxiang Tong et al
EPI_ISL_833164	Secretaria Municipal de Saude de Santa Barbara d'oeste	Instituto Adolfo Lutz, Interdiciplinary Procedures Center, Strategic Laboratory	Claudio Tavares Sacchi et al
EPI_ISL_940555	Molecular & Cellular Virology Center for Infection and Immunity of Lille (CIIL) Inserm U1019, CNRS UMR 9017, Univ. Lille	Transcriptomics & Applied Genomics (TAG)	Belouzard S. et al
EPI_ISL_409067	Massachusetts Department of Public Health	Pathogen Discovery, Respiratory Viruses Branch, Division of Viral Diseases, Centers for Disease Control and Prevention	Clinton R. Paden et al
EPI_ISL_654889	Pasteur Institute in Ho Chi Minh city	Department of Microbiology and Immunology - Pasteur Institute in Ho Chi Minh city	Hoàng Quốc Cường et al
EPI_ISL_477171	Department of Laboratory, Medicine Tan Tock Seng Hospital	Department of Laboratory, Medicine Tan Tock Seng Hospital	Chen YYC et al
EPI_ISL_412964	Hospital Israelita Albert Einstein	Instituto Adolfo Lutz Interdisciplinary Procedures Center Strategic Laboratory	Jaqueline Goes de Jesus et al
EPI_ISL_460094,EPI_ISL_460095,EPI_ISL_460079	Molecular Virology Unit, Fondazione IRCCS Policlinico San Matteo , Pavia	Laboratory of Virology, INMI Lazzaro Spallanzani IRCCS	Barbara Bartolini et al
EPI_ISL_640079	Stellenbosch Hospital wc STB	NHLS/UCT	Arash Iranzadeh et al
EPI_ISL_475026	Banas Medical College and Research Institute	Gujarat Biotechnology Research Centre	Sunil R Joshi et al
EPI_ISL_872100,EPI_ISL_872101,EPI_ISL_872102,EPI_ISL_872103,EPI_ISL_872104	Chu Tivoli	GIGA Medical Genomics	Keith Durkin et al
EPI_ISL_435149,EPI_ISL_435154,EPI_ISL_435155,EPI_ISL_435153,EPI_ISL_436726,EPI_ISL_436727,EPI_ISL_436728,EPI_ISL_436729	SERVIZIO DI IGIENE E SANITÀ PUBBLICA ASL Teramo	Istituto Zooprofilattico Sperimentale dell'Abruzzo e Molise "G.Caporale"	Lorusso A et al
EPI_ISL_586533	General Hospital,Chhotaudepur	Gujarat Biotechnology Research Centre	Dharak Pandya et al
EPI_ISL_445298	HOSPITAL DE SAN FERNANDO	Instituto de Salud Publica de Chile	Andrés E Castillo et al
EPI_ISL_523965,EPI_ISL_523972,EPI_ISL_515565,EPI_ISL_523982,EPI_ISL_523978,EPI_ISL_524470,EPI_ISL_471548	Hospital do Servidor Público Estadual Francisco Morato de Oliveira	Instituto Adolfo Lutz, Interdiciplinary Procedures Center, Strategic Laboratory	Claudio Tavares Sacchi et al
EPI_ISL_429161,EPI_ISL_429162,EPI_ISL_429163	The Public Health Agency of Sweden	The Public Health Agency of Sweden	Olov Svartstrom et al
EPI_ISL_447887,EPI_ISL_447888,EPI_ISL_447889,EPI_ISL_447890,EPI_ISL_447891,EPI_ISL_447892,EPI_ISL_447893,EPI_ISL_447894,EPI_ISL_447895,EPI_ISL_447896,EPI_ISL_548452,EPI_ISL_548479,EPI_ISL_548477,EPI_ISL_548447,EPI_ISL_548374,EPI_ISL_548486,EPI_ISL_548380,EPI_ISL_548474,EPI_ISL_548435,EPI_ISL_548414,EPI_ISL_548458,EPI_ISL_548382,EPI_ISL_548490	University of California, Davis	Chan-Zuckerberg Biohub	CZB Cliahub Consortium et al
EPI_ISL_631508	Brooklyn Hospital Center	New York City Public Health Laboratory	Jade Wang et al
EPI_ISL_415460,EPI_ISL_415461,EPI_ISL_414423,EPI_ISL_415462,EPI_ISL_415463,EPI_ISL_414424,EPI_ISL_414425,EPI_ISL_414426,EPI_ISL_414448,EPI_ISL_414427,EPI_ISL_415464,EPI_ISL_415465,EPI_ISL_415466,EPI_ISL_415467,EPI_ISL_415468,EPI_ISL_415469,EPI_ISL_415470,EPI_ISL_415471,EPI_ISL_415472,EPI_ISL_415473,EPI_ISL_415474,EPI_ISL_415475,EPI_ISL_415476,EPI_ISL_415477,EPI_ISL_415478,EPI_ISL_415479,EPI_ISL_4…	Dutch COVID-19 response team	Erasmus Medical Center	David Nieuwenhuijse et al
EPI_ISL_768523	Singburi Hospital	National Institute of Health, Department of Medical Sciences, Ministry of Public Health, Thailand	Pilailuk Okada et al
EPI_ISL_421236,EPI_ISL_421235,EPI_ISL_421234,EPI_ISL_421233,EPI_ISL_421232,EPI_ISL_421231,EPI_ISL_421230,EPI_ISL_421229,EPI_ISL_421228,EPI_ISL_421227,EPI_ISL_421226,EPI_ISL_421225,EPI_ISL_421224,EPI_ISL_421223,EPI_ISL_482575,EPI_ISL_482576,EPI_ISL_482577,EPI_ISL_482578,EPI_ISL_421222,EPI_ISL_421221,EPI_ISL_482579,EPI_ISL_482580,EPI_ISL_482581,EPI_ISL_482583,EPI_ISL_482584,EPI_ISL_482585,EPI_ISL_4…	Hangzhou Center for Diseases Control and Prevention	Hangzhou Center for Diseases Control and Prevention	Jun Li et al
EPI_ISL_475057	Dr. N. D. Desai Medical College & Hospital	Gujarat Biotechnology Research Centre	Zuber Saiyed et al
EPI_ISL_539820,EPI_ISL_539803,EPI_ISL_539816,EPI_ISL_539817,EPI_ISL_733571	Queen Mary Hospital	Hong Kong Department of Health	Alan K.L. Tsang et al
EPI_ISL_759842	Rumah Sakit Universitas Sebelas Maret (RS-UNS)	Universitas Sebelas Maret (UNS); Rumah Sakit Universitas Sebelas Maret (RS-UNS), Surakarta; National Institute of Health Research and Development, Indonesian Ministry of Health, Jakarta.	Betty Suryawati et al
EPI_ISL_464112,EPI_ISL_464113,EPI_ISL_464114,EPI_ISL_464115,EPI_ISL_464116,EPI_ISL_464117,EPI_ISL_464118,EPI_ISL_464119,EPI_ISL_464120,EPI_ISL_464121,EPI_ISL_464122,EPI_ISL_464123,EPI_ISL_464125,EPI_ISL_464126,EPI_ISL_464127,EPI_ISL_464128,EPI_ISL_464129,EPI_ISL_464130,EPI_ISL_464131,EPI_ISL_464132,EPI_ISL_464133,EPI_ISL_464135,EPI_ISL_464136,EPI_ISL_464137,EPI_ISL_464138,EPI_ISL_464139,EPI_ISL_4…	National Health Laboratory Service (NHLS), Tygerberg	Division of Medical Virology, Stellenbosch University and National Health Laboratory Service (NHLS)	Susan Engelbrecht et al
EPI_ISL_955254	UMF 28 DEL VALLE	BIOBANCO / COCTI	Borja-Aburto VH et al
EPI_ISL_853676,EPI_ISL_853677,EPI_ISL_853678,EPI_ISL_853679,EPI_ISL_853680,EPI_ISL_830724,EPI_ISL_830725,EPI_ISL_853681,EPI_ISL_853682	ACUTIS DIAGNOSTICS	Wadsworth Center, New York State Department of Health	Kirsten St. George et al
EPI_ISL_965139	Fondazione Policlinico Universitario “A. Gemelli” IRCCS	INMI Lazzaro Spallanzani IRCCS	B Bartolini et al
EPI_ISL_466648	Innovative Genomics Institute, UCB	Innovative Genomics Institute, UCB	Stacia Wyman et al
EPI_ISL_419553	RI State Health Laboratories	Pathogen Discovery, Respiratory Viruses Branch, Division of Viral Diseases, Centers for Disease Control and Prevention	Ying Tao et al
EPI_ISL_984678,EPI_ISL_984683,EPI_ISL_977505,EPI_ISL_977506,EPI_ISL_977510,EPI_ISL_977511,EPI_ISL_977512	Laboratorio de Virología HUCA	Laboratorio de Virología HUCA	Sandoval M et al
EPI_ISL_442044	Kawsar Human Genetic Research Center	Kawsar Human Genetic Research Center	Mohammad Ali Khosravi et al
EPI_ISL_631529	St. Johns Episcopal Hospital	New York City Public Health Laboratory	Jade Wang et al
EPI_ISL_596647,EPI_ISL_596648,EPI_ISL_596642,EPI_ISL_596670,EPI_ISL_596668,EPI_ISL_596653,EPI_ISL_596646,EPI_ISL_596649,EPI_ISL_596675,EPI_ISL_596654,EPI_ISL_596669,EPI_ISL_596658,EPI_ISL_596645,EPI_ISL_596673,EPI_ISL_596650,EPI_ISL_596659,EPI_ISL_596664,EPI_ISL_596674,EPI_ISL_596641,EPI_ISL_596657,EPI_ISL_596656,EPI_ISL_596660,EPI_ISL_596661,EPI_ISL_596665,EPI_ISL_596666,EPI_ISL_596655,EPI_ISL_5…	St.Vincent's University Hospital	St.Vincent's University Hospital	Mary Lucey et al
EPI_ISL_574613,EPI_ISL_574615	RS Harapan Bunda	Eijkman Institute for Molecular Biology, Ministry of Research and Technology/National Agency for Research and Innovation	Frilasita A Yudhaputri et al
EPI_ISL_528749	Santosa Hospital Bandung Central	School of Life Sciences and Technology & School of Pharmacy-Institut Teknologi Bandung; Molecular Genetics Laboratory-Faculty of Medicine-Universitas Padjadjaran; Laboratorium Kesehatan Provinsi Jawa Barat	Husna Nugrahapraja et al
EPI_ISL_873277	Environmental and Global Health, University of Florida	Environmental and Global Health, University of Florida	Iovine et al
EPI_ISL_634830,EPI_ISL_700361	Laboratoire de virologie, CHU de Grenoble - CS 10217 - 38043 Grenoble cedex 22	CNR Virus des Infections Respiratoires - France SUD	Antonin Bal et al
EPI_ISL_455107	Narhalsan Mellerud	The Public Health Agency of Sweden	Maria Nykvist et al
EPI_ISL_770031,EPI_ISL_770032	Hle-Asociacion De Atencion Integral Del Anciano San Cayetano	Inciensa, Instituto Costarricense de Investigación y Enseñanza en Nutrición y Salud	Francisco Duarte et al
EPI_ISL_636113,EPI_ISL_636114,EPI_ISL_636115,EPI_ISL_636116,EPI_ISL_636117,EPI_ISL_636118,EPI_ISL_636119,EPI_ISL_636120,EPI_ISL_730127,EPI_ISL_730128,EPI_ISL_730129,EPI_ISL_730130,EPI_ISL_730131,EPI_ISL_730132,EPI_ISL_730133,EPI_ISL_730134,EPI_ISL_730135,EPI_ISL_730136,EPI_ISL_962662,EPI_ISL_962663,EPI_ISL_880037,EPI_ISL_880040,EPI_ISL_880042,EPI_ISL_880045,EPI_ISL_880048,EPI_ISL_880050,EPI_ISL_8…	Sharp HealthCare Laboratory	Andersen lab at Scripps Research	SEARCH Alliance San Diego with Aaron Harding et al
EPI_ISL_481244,EPI_ISL_481245,EPI_ISL_471268,EPI_ISL_481246,EPI_ISL_481247,EPI_ISL_481248,EPI_ISL_574431	Hospital IESS Babahoyo	Institute of Microbiology, Universidad San Francisco de Quito	Belén Prado-Vivar et al
EPI_ISL_845627	SYNLAB COLOMBIA S.A.S	Instituto Nacional de Salud - Dirección de Investigación en Salud Pública	Katherine Laiton-Donato et al
EPI_ISL_861628,EPI_ISL_861678	Laboratorio Municipal de Guarulhos	Instituto Adolfo Lutz, Interdiciplinary Procedures Center, Strategic Laboratory	Claudio Tavares Sacchi et al
EPI_ISL_649155,EPI_ISL_648303,EPI_ISL_648304,EPI_ISL_648305,EPI_ISL_648306,EPI_ISL_648307,EPI_ISL_648308,EPI_ISL_648309,EPI_ISL_648310,EPI_ISL_648311,EPI_ISL_648312,EPI_ISL_649156,EPI_ISL_648313,EPI_ISL_648356,EPI_ISL_648357,EPI_ISL_648358,EPI_ISL_648359,EPI_ISL_648360,EPI_ISL_649157,EPI_ISL_649158,EPI_ISL_649159,EPI_ISL_648361,EPI_ISL_648362,EPI_ISL_648363,EPI_ISL_649160,EPI_ISL_649161,EPI_ISL_6…	Laboratorio de Investigaciones de Baney	University Hospital Basel, Clinical Bacteriology	Carlos Cortes et al
EPI_ISL_582799,EPI_ISL_582839	Stockholm_KUL Solna	The Public Health Agency of Sweden	Anna-Malin Linde et al
EPI_ISL_696461,EPI_ISL_696452,EPI_ISL_696455,EPI_ISL_696500,EPI_ISL_696499,EPI_ISL_696520,EPI_ISL_696496,EPI_ISL_696494,EPI_ISL_696493,EPI_ISL_696519	Thembalethu CDC wc THC & NHLS/UCT	KRISP, KZN Research Innovation and Sequencing Platform	Arash Iranzadeh et al
EPI_ISL_812233,EPI_ISL_812234,EPI_ISL_812235,EPI_ISL_812236,EPI_ISL_812237,EPI_ISL_812238,EPI_ISL_812239,EPI_ISL_812240,EPI_ISL_812241,EPI_ISL_812242,EPI_ISL_812243,EPI_ISL_812244,EPI_ISL_812245,EPI_ISL_812246,EPI_ISL_812247,EPI_ISL_812248,EPI_ISL_848546,EPI_ISL_848547,EPI_ISL_848548,EPI_ISL_848549,EPI_ISL_848550,EPI_ISL_848551,EPI_ISL_848552,EPI_ISL_848553,EPI_ISL_848634,EPI_ISL_848554,EPI_ISL_8…	North Dakota Department of Health, Public Health Laboratory	North Dakota Department of Health, Public Health Laboratory	Lisa Wingerter et al
EPI_ISL_428925,EPI_ISL_428926,EPI_ISL_428927,EPI_ISL_428928,EPI_ISL_428929,EPI_ISL_428930,EPI_ISL_428931,EPI_ISL_428932	ViroGenetics - BSL3 Laboratory of Virology; Human Genome Variation Research Group & Genomics Centre MCB; Bioinformatics Research Group; Wojewódzka Stacja Sanitarno-Epidemiologiczna w Krakowie	ViroGenetics - BSL3 Laboratory of Virology; Human Genome Variation Research Group & Genomics Centre MCB; Bioinformatics Research Group	Wojciech Branicki et al
EPI_ISL_893721,EPI_ISL_893722,EPI_ISL_893723	Oregon State Public Health Laboratory	Pathogen Discovery, Respiratory Viruses Branch, Division of Viral Diseases, Centers for Disease Control and Prevention	Ying Tao et al
EPI_ISL_477204	Prof. Massimo Zollo CEINGE TASK-FORCE COVID19 - Regione Campania	Prof. Massimo Zollo CEINGE TASK-FORCE COVID19 - Regione Campania	Veronica Ferrucci1 et al
EPI_ISL_641521	CHU de Nice - Hôpital Archet 8	CNR Virus des Infections Respiratoires - France SUD	Antonin Bal et al
EPI_ISL_962522	Tokyo Metropolitan Institute of Public Health	Tokyo Metropolitan Institute of Public Health	Masaki Hayashi et al
EPI_ISL_683729,EPI_ISL_683730,EPI_ISL_683731,EPI_ISL_683732,EPI_ISL_683733,EPI_ISL_683734,EPI_ISL_683735,EPI_ISL_683736,EPI_ISL_683737,EPI_ISL_683738,EPI_ISL_683739,EPI_ISL_683740,EPI_ISL_683741,EPI_ISL_683742,EPI_ISL_683743,EPI_ISL_683744,EPI_ISL_683745,EPI_ISL_683746,EPI_ISL_683747,EPI_ISL_683748,EPI_ISL_683749,EPI_ISL_683750,EPI_ISL_708460,EPI_ISL_708461,EPI_ISL_708462,EPI_ISL_708463,EPI_ISL_7…	Minnesota Department of Health, Public Health Laboratory	Minnesota Department of Health, Public Health Laboratory	Alexandra Lorentz et al
EPI_ISL_672012	Laboratorio de Virología y Microbiología Molecular, Depto. de Microbiología, Facultad de Medicina, Universidad de El Salvador/INS-laboratorio de Ref. Ministerio de Salud. 1*: Dr. Noé Rigoberto Rivera, profesor del Departamento de Bioquímica e Investigador adjunto de la Sección de Virología y Microbiología Molecular; director de la Unidad de Investigaciones Científicas (UNICA), Facultad de Medicin…	Laboratorio de Virología y Microbiología Molecular, Depto. de Microbiología, Facultad de Medicina, Universidad de El Salvador/INS-laboratorio de Ref. Ministerio de Salud.	Ortega Pérez CA et al et al
EPI_ISL_826594,EPI_ISL_826583,EPI_ISL_826595,EPI_ISL_826596,EPI_ISL_826585,EPI_ISL_826597,EPI_ISL_826598,EPI_ISL_826599,EPI_ISL_826600,EPI_ISL_826601,EPI_ISL_826602,EPI_ISL_826578,EPI_ISL_826584,EPI_ISL_826579,EPI_ISL_826581,EPI_ISL_826603,EPI_ISL_826604,EPI_ISL_826605,EPI_ISL_826606,EPI_ISL_826607,EPI_ISL_826608,EPI_ISL_826609,EPI_ISL_826610,EPI_ISL_826611,EPI_ISL_826586,EPI_ISL_826612,EPI_ISL_8…	Montefiore Medical Center	Albert Einstein College of Medicine, Dept. of Microbiology & Immunology, Chandran lab	J. Maximilian Fels et al
EPI_ISL_682240	AREA DE SALUD GOICOCHEA 1	Inciensa, Instituto Costarricense de Investigación y Enseñanza en Nutrición y Salud	Francisco Duarte et al
EPI_ISL_682275,EPI_ISL_682276,EPI_ISL_682277	LABORATORIOS LABIN	Inciensa, Instituto Costarricense de Investigación y Enseñanza en Nutrición y Salud	Francisco Duarte et al
EPI_ISL_432710,EPI_ISL_432711,EPI_ISL_432712,EPI_ISL_432713,EPI_ISL_432714,EPI_ISL_432716,EPI_ISL_432717,EPI_ISL_432718,EPI_ISL_432719,EPI_ISL_432720,EPI_ISL_432721,EPI_ISL_432722,EPI_ISL_432723,EPI_ISL_432724,EPI_ISL_432725,EPI_ISL_432726,EPI_ISL_432727,EPI_ISL_432728,EPI_ISL_432729,EPI_ISL_432730,EPI_ISL_432731,EPI_ISL_432732,EPI_ISL_432733,EPI_ISL_432734,EPI_ISL_432735,EPI_ISL_432736,EPI_ISL_4…	Virology Department, Sheffield Teaching Hospitals NHS Foundation Trust / Virology Department, Sheffield Teaching Hospitals NHS Foundation Trust	COVID-19 Genomics UK (COG-UK) Consortium	Thushan de Silva et al
EPI_ISL_960698,EPI_ISL_960765,EPI_ISL_960796,EPI_ISL_960800,EPI_ISL_960813,EPI_ISL_960733,EPI_ISL_960802,EPI_ISL_960697,EPI_ISL_960814,EPI_ISL_960709,EPI_ISL_960797,EPI_ISL_960756,EPI_ISL_960707,EPI_ISL_960766,EPI_ISL_960777,EPI_ISL_960763,EPI_ISL_960815,EPI_ISL_960721,EPI_ISL_960770,EPI_ISL_960679,EPI_ISL_960767,EPI_ISL_960694,EPI_ISL_960816,EPI_ISL_960757,EPI_ISL_960779,EPI_ISL_960825,EPI_ISL_9…	Germano de sousa	Instituto Gulbenkian de Ciencia	João Sobral et al
EPI_ISL_794608,EPI_ISL_794606	Central Public Health Laboratories, Egyptian Ministry of Health and Population	Central Public Health Laboratories, Egyptian Ministry of Health and Population	El-Shesheny et al
EPI_ISL_455019	Government Medical College, Vadodara	Gujarat Biotechnology Research Centre	Ramesh Pandit et al
EPI_ISL_461493	B.J. Medical College and Civil hospital	Gujarat Biotechnology Research Centre	Armi Chaudhari et al
EPI_ISL_586559	CCC,Veraval	Gujarat Biotechnology Research Centre	Komal Patel et al
EPI_ISL_411950	NHC Key laboratory of Enteric Pathogenic Microbiology, Institute of Pathogenic Microbiology	Jiangsu Provincial Center for Disease Control & Prevention	Lunbiao Cui et al
EPI_ISL_944595,EPI_ISL_944597,EPI_ISL_944598,EPI_ISL_944605	Connecticut Department of Public Health	Grubaugh Lab - Yale School of Public Health	Joseph Fauver et al
EPI_ISL_981377,EPI_ISL_981375,EPI_ISL_888678,EPI_ISL_910337,EPI_ISL_910336,EPI_ISL_910016,EPI_ISL_910029,EPI_ISL_910339,EPI_ISL_910338,EPI_ISL_910335,EPI_ISL_940554,EPI_ISL_940144,EPI_ISL_754238,EPI_ISL_981374,EPI_ISL_935021,EPI_ISL_939647,EPI_ISL_935017	Laboratory for Respiratory Viruses, Cantacuzino National Military-Medical Institute for Research and Development	Cantacuzino Institute Virology	Luiza Ustea et al
EPI_ISL_455336,EPI_ISL_455337,EPI_ISL_455338,EPI_ISL_578196,EPI_ISL_455339,EPI_ISL_578197,EPI_ISL_455340,EPI_ISL_578198,EPI_ISL_455341,EPI_ISL_578199,EPI_ISL_455342,EPI_ISL_578200,EPI_ISL_578201,EPI_ISL_419234,EPI_ISL_455343	Hospital San Pedro	Instituto de Salud Carlos III	Iglesias-Caballero et al
EPI_ISL_631520,EPI_ISL_631557,EPI_ISL_631577,EPI_ISL_631584,EPI_ISL_631587,EPI_ISL_631603,EPI_ISL_631607,EPI_ISL_631686,EPI_ISL_631691,EPI_ISL_631693,EPI_ISL_631752,EPI_ISL_631753,EPI_ISL_631754,EPI_ISL_631799,EPI_ISL_631827,EPI_ISL_631886,EPI_ISL_631953,EPI_ISL_632026,EPI_ISL_632072,EPI_ISL_632116,EPI_ISL_632131,EPI_ISL_632146,EPI_ISL_632147,EPI_ISL_632177,EPI_ISL_632186,EPI_ISL_632187,EPI_ISL_6…	NYC HH Lincoln Medical And Mental Health Center	New York City Public Health Laboratory	Jade Wang et al
EPI_ISL_447588	Lednicky Lab	Lednicky lab	Elbadry et al
EPI_ISL_856695	University of Zambia, School of Veterinary Medicine, Disease Control	University of Zambia, School of Veterinary Medicine, Disease Control	Simulundu et al
EPI_ISL_480002,EPI_ISL_480003	Nagasaki Prefectural Institute for Environmental Research and Public Health	Pathogen Genomics Center, National Institute of Infectious Diseases	Tsuyoshi Sekizuka et al
EPI_ISL_660445,EPI_ISL_660446,EPI_ISL_660478,EPI_ISL_660447,EPI_ISL_660513,EPI_ISL_660448,EPI_ISL_660449,EPI_ISL_660514,EPI_ISL_660505,EPI_ISL_660526,EPI_ISL_660450,EPI_ISL_660451,EPI_ISL_660515,EPI_ISL_660479,EPI_ISL_660452,EPI_ISL_660453,EPI_ISL_660454,EPI_ISL_660490,EPI_ISL_660492,EPI_ISL_660493,EPI_ISL_660499,EPI_ISL_660527,EPI_ISL_660455,EPI_ISL_660500,EPI_ISL_660456,EPI_ISL_660457,EPI_ISL_6…	Laboratoire de Microbiologie CHU Souro Sanou	Centre Muraz	Abdoul-Salam Ouedraogo et al
EPI_ISL_509417,EPI_ISL_509413,EPI_ISL_509414,EPI_ISL_509415,EPI_ISL_509416	Acibadem Labcell Cellular Therapy Laboratory	Acibadem Mehmet Ali Aydinlar University School of Medicine, Medical Genetics Department	Ozden Hatirnaz Ng et al
EPI_ISL_452142,EPI_ISL_452148,EPI_ISL_452140,EPI_ISL_452149	CUB Hopital Erasme Laboratoire d'Anatomie Pathologique	CUB Hopital Erasme Laboratoire d'Anatomie Pathologique	Isabelle Salmon et al
EPI_ISL_451162	Government Medical College, Vadodara	Gujarat Biotechnology Research Centre	Komal Patel et al
EPI_ISL_872628,EPI_ISL_872629,EPI_ISL_872630,EPI_ISL_872631,EPI_ISL_872632,EPI_ISL_872633,EPI_ISL_872634,EPI_ISL_872635,EPI_ISL_872636,EPI_ISL_872637,EPI_ISL_872638,EPI_ISL_872639,EPI_ISL_872640,EPI_ISL_470897,EPI_ISL_872643,EPI_ISL_470898,EPI_ISL_470899	Pathogenic Microorganisms Variability Laboratory	Pathogenic Microorganisms Variability Laboratory	Alexey Shchetinin et al
EPI_ISL_856971	Laboratory of Histology-Embryology, Molecular Carcinogenesis Group Medical School National and Kapodistrian University of Athens	Prof. Gorgoulis Lab	Gorgoulis V.G. et al
EPI_ISL_735420	UBS Riacho Grande	Instituto Adolfo Lutz, Interdiciplinary Procedures Center, Strategic Laboratory	Claudio Tavares Sacchi et al
EPI_ISL_983321	Eurofins Genoma Group s.r.l.	INMI Lazzaro Spallanzani IRCCS	O Butera et al
EPI_ISL_683835	CICM	Malaria Research and Training Center (MRTC-Parasito)	Antoine Dara et al
EPI_ISL_535744	Hôpital de Lasalle	Laboratoire de santé publique du Québec	Sandrine Moreira et al
EPI_ISL_806778,EPI_ISL_806779,EPI_ISL_806780,EPI_ISL_806777,EPI_ISL_806735,EPI_ISL_806736,EPI_ISL_806737,EPI_ISL_806738,EPI_ISL_806739,EPI_ISL_806766,EPI_ISL_806740,EPI_ISL_806741,EPI_ISL_806742,EPI_ISL_806743,EPI_ISL_806767,EPI_ISL_806744,EPI_ISL_806768,EPI_ISL_806769,EPI_ISL_806770,EPI_ISL_806771,EPI_ISL_806772,EPI_ISL_806786,EPI_ISL_806787,EPI_ISL_806788,EPI_ISL_806746,EPI_ISL_806747,EPI_ISL_8…	SIESP DIPARTIMENTO DI PREVENZIONE TERAMO	Istituto Zooprofilattico Sperimentale dell’Abruzzo e Molise “G. Caporale”	Lorusso A et al
EPI_ISL_882612,EPI_ISL_882613,EPI_ISL_882615,EPI_ISL_882616,EPI_ISL_882632,EPI_ISL_882617,EPI_ISL_882618,EPI_ISL_882620,EPI_ISL_882621,EPI_ISL_882623,EPI_ISL_882624,EPI_ISL_882625,EPI_ISL_882627,EPI_ISL_882628,EPI_ISL_882629,EPI_ISL_882631	Hospital Ramón y Cajal	Hospital Ramón y Cajal	José M Gonzalez-Alba et al
EPI_ISL_906285,EPI_ISL_906286,EPI_ISL_906287,EPI_ISL_906288,EPI_ISL_906291,EPI_ISL_906302,EPI_ISL_906303,EPI_ISL_906305,EPI_ISL_906295,EPI_ISL_906296,EPI_ISL_906297,EPI_ISL_906299,EPI_ISL_906300,EPI_ISL_906301,EPI_ISL_906277,EPI_ISL_906278,EPI_ISL_906279,EPI_ISL_906281,EPI_ISL_906283,EPI_ISL_906284,EPI_ISL_941275,EPI_ISL_941276,EPI_ISL_941277,EPI_ISL_941278,EPI_ISL_941279,EPI_ISL_941280,EPI_ISL_9…	Nigeria Centre for Disease Control (NCDC)	African Centre of Excellence for Genomics of Infectious Diseases (ACEGID), Redeemer's University	Oluniyi P.E. et al et al
EPI_ISL_903947,EPI_ISL_903943,EPI_ISL_903814,EPI_ISL_903942,EPI_ISL_903946,EPI_ISL_903623,EPI_ISL_903945,EPI_ISL_903944,EPI_ISL_903858	ND Dept. of Health Laboratory Services-Microbiology	Genomics and Discovery, Respiratory Viruses Branch, Division of Viral Diseases, Centers for Disease Control and Prevention	Krista Queen et al
EPI_ISL_634817,EPI_ISL_700348,EPI_ISL_900510	Laboratoire de virologie, CHU de Grenoble - CS 10217 - 38043 Grenoble cedex 9	CNR Virus des Infections Respiratoires - France SUD	Antonin Bal et al
EPI_ISL_524475,EPI_ISL_524477,EPI_ISL_939660,EPI_ISL_939661,EPI_ISL_939662,EPI_ISL_939663,EPI_ISL_939664,EPI_ISL_939665,EPI_ISL_939666,EPI_ISL_939667,EPI_ISL_939668,EPI_ISL_939669,EPI_ISL_939670,EPI_ISL_939671,EPI_ISL_939672	Division of Infectious Diseases, University Hospital Zürich	Institute of Medical Virology, University of Zurich	Stefan Schmutz et al
EPI_ISL_812255	Kantonsärztlicher Dienst Aargau	Institute of Medical Virology, University of Zurich	Stefan Schmutz et al
EPI_ISL_479913,EPI_ISL_479914,EPI_ISL_479915,EPI_ISL_479916,EPI_ISL_479917,EPI_ISL_479918,EPI_ISL_479919,EPI_ISL_479920,EPI_ISL_479921,EPI_ISL_479922,EPI_ISL_479923,EPI_ISL_479924	Niigata City Public Health Research Institute	Pathogen Genomics Center, National Institute of Infectious Diseases	Tsuyoshi Sekizuka et al
EPI_ISL_861681,EPI_ISL_583498	Hospital Municipal Dr. Waldemar Tebaldi	Instituto Adolfo Lutz, Interdiciplinary Procedures Center, Strategic Laboratory	Claudio Tavares Sacchi et al
EPI_ISL_468161,EPI_ISL_468163	Department of Virology, Public Health Laboratories Division, National Institute of Health	Department of Virology, Public Health Laboratories Division, National Institute of Health	Massab Umair et al
EPI_ISL_443308	Plaisance	National Reference Center for Viruses of Respiratory Infections, Institut Pasteur, Paris	Mélanie Albert et al
EPI_ISL_641314,EPI_ISL_641313,EPI_ISL_641316,EPI_ISL_641317,EPI_ISL_641312,EPI_ISL_641315	Rocky Mountain Laboratories, RTS Genomics Unit, National Institute of Allergy and Infectious Diseases, National Institutes of Health	Rocky Mountain Laboratories, RTS Genomics Unit, National Institute of Allergy and Infectious Diseases, National Institutes of Health	Avanzato et al
EPI_ISL_450841	COVID-19 Laboratory	DNA Solution Ltd	Sharif Akhteruzzaman et al
EPI_ISL_767896,EPI_ISL_767902,EPI_ISL_767916,EPI_ISL_767917,EPI_ISL_767918,EPI_ISL_872585,EPI_ISL_451486,EPI_ISL_451574,EPI_ISL_451599,EPI_ISL_513331,EPI_ISL_544966,EPI_ISL_544967,EPI_ISL_544988,EPI_ISL_547597,EPI_ISL_545024,EPI_ISL_591484	Australian Clinical Labs	NSW Health Pathology - Institute of Clinical Pathology and Medical Research; Westmead Hospital; University of Sydney	CIDM-PH et al. et al
EPI_ISL_475058,EPI_ISL_495066	GAIMS & G K General Hospital	Gujarat Biotechnology Research Centre	Babulal Babhoria et al
EPI_ISL_538510	RSUD Ulin Banjarmasin South Kalimantan	National Institute of Health Research and Development	Pawestri et al
EPI_ISL_602304	Istituto Zooprofilattico Sperimentale del Mezzogiorno	U.O. Diagnostica Virologica Dip. Sanità Animale IZSM	Maurizio Viscardi et al
EPI_ISL_745188	Nababeep Hospital	National Health Laboratory Service (NHLS), Tygerberg	Susan Engelbrecht et al
EPI_ISL_527857	Hospital Regional Vale do Ribeira	Instituto Adolfo Lutz, Interdiciplinary Procedures Center, Strategic Laboratory	Claudio Tavares Sacchi et al
EPI_ISL_911923	IL Department of Public Health Chicago Laboratory/Tempus Labs	Pathogen Discovery, Respiratory Viruses Branch, Division of Viral Diseases, Centers for Disease Control and Prevention	Ying Tao et al
EPI_ISL_428856	MRCG at LSHTM Genomics Lab	MRCG at LSHTM Genomics lab	Sesay et al et al
EPI_ISL_586556	CCC,Veraval	Gujarat Biotechnology Research Centre	Raghawendra Kumar et al
EPI_ISL_969740,EPI_ISL_969397,EPI_ISL_969509	Indian Council of Medical Research-National Institute of Virology, Pune	Indian Council of Medical Research-National Institute of Virology, Maximum Containment Laboratory	Pragya D. Yadav et al
EPI_ISL_791981	Balai Litbang Aceh	National Institute of Health Research and Development	Ikawati et al
EPI_ISL_461483,EPI_ISL_461496	B.J. Medical College and Civil hospital	Gujarat Biotechnology Research Centre	Dipeshwari Shewale et al
EPI_ISL_583171,EPI_ISL_583172,EPI_ISL_648531,EPI_ISL_648532,EPI_ISL_648533,EPI_ISL_648534,EPI_ISL_648535,EPI_ISL_648536,EPI_ISL_648537,EPI_ISL_648538,EPI_ISL_648539,EPI_ISL_648540,EPI_ISL_648541,EPI_ISL_739119,EPI_ISL_739193,EPI_ISL_739639	Tulare County Public Health Lab	Chan-Zuckerberg Biohub	CZB Cliahub Consortium et al
EPI_ISL_693192	Royal Hobart Hospital	Royal Hobart Hospital	Rob Vanhaeften et al
EPI_ISL_430016,EPI_ISL_429991	Andersen lab at Scripps Research	Andersen lab at Scripps Research	SEARCH Alliance San Diego et al
EPI_ISL_525488,EPI_ISL_525489,EPI_ISL_525486,EPI_ISL_525481,EPI_ISL_525476,EPI_ISL_525478,EPI_ISL_525479,EPI_ISL_428670,EPI_ISL_428673,EPI_ISL_428671,EPI_ISL_428672	Centre for Dengue Research	Centre for Dengue Research	Chandima Jeewandara et al
EPI_ISL_581448,EPI_ISL_581446,EPI_ISL_581444,EPI_ISL_581436,EPI_ISL_581445,EPI_ISL_581442,EPI_ISL_581435,EPI_ISL_581433,EPI_ISL_581429,EPI_ISL_581427,EPI_ISL_581431,EPI_ISL_581430,EPI_ISL_581432,EPI_ISL_581426,EPI_ISL_602161,EPI_ISL_581424,EPI_ISL_581391,EPI_ISL_581413,EPI_ISL_581414,EPI_ISL_581412,EPI_ISL_581404,EPI_ISL_581409,EPI_ISL_581411,EPI_ISL_581417,EPI_ISL_581416,EPI_ISL_590369,EPI_ISL_5…	Lighthouse Lab in Alderley Park	Wellcome Sanger Institute for the COVID-19 Genomics UK (COG-UK) consortium	Jacquelyn Wynn et al
EPI_ISL_575599,EPI_ISL_575527,EPI_ISL_575493,EPI_ISL_575501,EPI_ISL_575445,EPI_ISL_575492,EPI_ISL_575545,EPI_ISL_575522,EPI_ISL_575457,EPI_ISL_575409,EPI_ISL_575752,EPI_ISL_575500,EPI_ISL_575621,EPI_ISL_575420,EPI_ISL_575661,EPI_ISL_575472,EPI_ISL_575446,EPI_ISL_575433,EPI_ISL_575732,EPI_ISL_575691,EPI_ISL_575565,EPI_ISL_575707,EPI_ISL_575507,EPI_ISL_575714,EPI_ISL_575448,EPI_ISL_575465,EPI_ISL_5…	Lighthouse Lab in Alderley Park	Wellcome Sanger Institute for the COVID-19 Genomics UK (COG-UK) consortium	Jacquelyn Wynn et al
EPI_ISL_580149,EPI_ISL_580119,EPI_ISL_579952,EPI_ISL_580044,EPI_ISL_580110,EPI_ISL_580154,EPI_ISL_579995,EPI_ISL_580159,EPI_ISL_579931,EPI_ISL_580003,EPI_ISL_580091,EPI_ISL_580078,EPI_ISL_589782,EPI_ISL_580020,EPI_ISL_580192,EPI_ISL_579988,EPI_ISL_579928,EPI_ISL_580237,EPI_ISL_580169,EPI_ISL_580122,EPI_ISL_580250,EPI_ISL_580259,EPI_ISL_580198,EPI_ISL_579989,EPI_ISL_580069,EPI_ISL_580076,EPI_ISL_5…	Lighthouse Lab in Alderley Park	Wellcome Sanger Institute for the COVID-19 Genomics UK (COG-UK) consortium	Jacquelyn Wynn et al
EPI_ISL_586624,EPI_ISL_586800,EPI_ISL_586917,EPI_ISL_586827,EPI_ISL_586889,EPI_ISL_586817,EPI_ISL_586887,EPI_ISL_586895,EPI_ISL_586830,EPI_ISL_586703,EPI_ISL_586697,EPI_ISL_586815,EPI_ISL_586937,EPI_ISL_586645,EPI_ISL_586919,EPI_ISL_586872,EPI_ISL_586899,EPI_ISL_586850,EPI_ISL_586781,EPI_ISL_586743,EPI_ISL_586591,EPI_ISL_586929,EPI_ISL_586595,EPI_ISL_586825,EPI_ISL_586628,EPI_ISL_586610,EPI_ISL_5…	Lighthouse Lab in Alderley Park	Wellcome Sanger Institute for the COVID-19 Genomics UK (COG-UK) consortium	Jacquelyn Wynn et al
EPI_ISL_598083,EPI_ISL_598056,EPI_ISL_598119,EPI_ISL_598146,EPI_ISL_598194,EPI_ISL_598178,EPI_ISL_597998,EPI_ISL_598015,EPI_ISL_597907,EPI_ISL_598229,EPI_ISL_597920,EPI_ISL_597993,EPI_ISL_598124,EPI_ISL_597983,EPI_ISL_598088,EPI_ISL_597994,EPI_ISL_598212,EPI_ISL_598093,EPI_ISL_597997,EPI_ISL_598160,EPI_ISL_598069,EPI_ISL_598138,EPI_ISL_598096,EPI_ISL_597914,EPI_ISL_598214,EPI_ISL_598207,EPI_ISL_5…	Lighthouse Lab in Alderley Park	Wellcome Sanger Institute for the COVID-19 Genomics UK (COG-UK) consortium	Jacquelyn Wynn et al
EPI_ISL_606950,EPI_ISL_607080,EPI_ISL_607109,EPI_ISL_607209,EPI_ISL_607286,EPI_ISL_607026,EPI_ISL_607088,EPI_ISL_607035,EPI_ISL_607049,EPI_ISL_607122,EPI_ISL_608259,EPI_ISL_608021,EPI_ISL_608228,EPI_ISL_608045,EPI_ISL_608159,EPI_ISL_608179,EPI_ISL_608193,EPI_ISL_608286,EPI_ISL_608318,EPI_ISL_607281,EPI_ISL_608323,EPI_ISL_608030,EPI_ISL_607998,EPI_ISL_608240,EPI_ISL_608024,EPI_ISL_608309,EPI_ISL_6…	Lighthouse Lab in Alderley Park	Wellcome Sanger Institute for the COVID-19 Genomics UK (COG-UK) consortium	Jacquelyn Wynn et al
EPI_ISL_610425,EPI_ISL_610450,EPI_ISL_610594,EPI_ISL_610614,EPI_ISL_610626,EPI_ISL_610586,EPI_ISL_610552,EPI_ISL_610542,EPI_ISL_610365,EPI_ISL_610455,EPI_ISL_610366,EPI_ISL_610442,EPI_ISL_610328,EPI_ISL_610599,EPI_ISL_610620,EPI_ISL_610390,EPI_ISL_610518,EPI_ISL_610432,EPI_ISL_610505,EPI_ISL_610325,EPI_ISL_610477,EPI_ISL_610479,EPI_ISL_610491,EPI_ISL_610482,EPI_ISL_610312,EPI_ISL_610333,EPI_ISL_6…	Lighthouse Lab in Alderley Park	Wellcome Sanger Institute for the COVID-19 Genomics UK (COG-UK) consortium	Jacquelyn Wynn et al
EPI_ISL_624715,EPI_ISL_611030,EPI_ISL_624591,EPI_ISL_624849,EPI_ISL_610961,EPI_ISL_624826,EPI_ISL_624696,EPI_ISL_624847,EPI_ISL_624693,EPI_ISL_624871,EPI_ISL_624604,EPI_ISL_624697,EPI_ISL_624576,EPI_ISL_624800,EPI_ISL_624901,EPI_ISL_624889,EPI_ISL_624675,EPI_ISL_624791,EPI_ISL_624745,EPI_ISL_624843,EPI_ISL_624650,EPI_ISL_610968,EPI_ISL_611186,EPI_ISL_611038,EPI_ISL_611216,EPI_ISL_611024,EPI_ISL_6…	Lighthouse Lab in Alderley Park	Wellcome Sanger Institute for the COVID-19 Genomics UK (COG-UK) consortium	Jacquelyn Wynn et al
EPI_ISL_625101,EPI_ISL_623965,EPI_ISL_624074,EPI_ISL_623910,EPI_ISL_624066,EPI_ISL_624172,EPI_ISL_624170,EPI_ISL_623938,EPI_ISL_624126,EPI_ISL_624083,EPI_ISL_624013,EPI_ISL_624136,EPI_ISL_624969,EPI_ISL_624958,EPI_ISL_625062,EPI_ISL_625265,EPI_ISL_625002,EPI_ISL_625173,EPI_ISL_625182,EPI_ISL_624948,EPI_ISL_624916,EPI_ISL_624937,EPI_ISL_625242,EPI_ISL_624929,EPI_ISL_625248,EPI_ISL_625023,EPI_ISL_6…	Lighthouse Lab in Alderley Park	Wellcome Sanger Institute for the COVID-19 Genomics UK (COG-UK) consortium	Jacquelyn Wynn et al
EPI_ISL_508287,EPI_ISL_508288,EPI_ISL_508289,EPI_ISL_508290,EPI_ISL_508291,EPI_ISL_508292,EPI_ISL_508293,EPI_ISL_508294,EPI_ISL_508295,EPI_ISL_508296,EPI_ISL_508297,EPI_ISL_508298,EPI_ISL_508299,EPI_ISL_508300,EPI_ISL_508301,EPI_ISL_508302,EPI_ISL_508303,EPI_ISL_508304,EPI_ISL_508305,EPI_ISL_508306,EPI_ISL_508307,EPI_ISL_508308,EPI_ISL_508309,EPI_ISL_508310,EPI_ISL_508311,EPI_ISL_508312,EPI_ISL_5…	Indian Institute of Science	National Institute of Biomedical Genomics	Arindam Maitra et al
EPI_ISL_445243,EPI_ISL_455469,EPI_ISL_455473,EPI_ISL_455472,EPI_ISL_455468,EPI_ISL_455477,EPI_ISL_455479,EPI_ISL_455470,EPI_ISL_455471,EPI_ISL_455475,EPI_ISL_455474,EPI_ISL_455476	Laboratory for Respiratory Viruses, Cantacuzino National Military-Medical Institute for Research and Development	Cantacuzino Institute	M.Lazar et al
EPI_ISL_806543	Santa Clara County Public Health Laboratory	Santa Clara County Public Health Laboratory	Santa Clara Co Public Health Department et al
EPI_ISL_476140,EPI_ISL_475101,EPI_ISL_475102,EPI_ISL_475103,EPI_ISL_476141,EPI_ISL_475104,EPI_ISL_476142	Klinisk Mikrobiologi	The Public Health Agency of Sweden	Oskar Karlsson Lindsjo et al
EPI_ISL_965245	OSPEDALE CIVILE TERAMO, DIV. PNEUMOLOGIA, PIA	Istituto Zooprofilattico Sperimentale dell’Abruzzo e Molise “G. Caporale”	Lorusso A et al
EPI_ISL_961293,EPI_ISL_961300,EPI_ISL_961301,EPI_ISL_961302,EPI_ISL_961303,EPI_ISL_961304,EPI_ISL_961305,EPI_ISL_961292,EPI_ISL_961306,EPI_ISL_961307,EPI_ISL_961294,EPI_ISL_961290,EPI_ISL_961308,EPI_ISL_961309,EPI_ISL_961310,EPI_ISL_961311,EPI_ISL_961312,EPI_ISL_961313,EPI_ISL_961314,EPI_ISL_961295,EPI_ISL_961315,EPI_ISL_961328,EPI_ISL_961329,EPI_ISL_961330,EPI_ISL_961291,EPI_ISL_961331,EPI_ISL_9…	Biotia	Biotia	Dorottya Nagy-Szakal et al
EPI_ISL_515472,EPI_ISL_515473,EPI_ISL_515474,EPI_ISL_515475,EPI_ISL_515476,EPI_ISL_515477,EPI_ISL_515471	National Institute of Health, Department of Medical Sciences, Ministry of Public Health, Thailand	National Institute of Health, Department of Medical Sciences, Ministry of Public Health, Thailand	Pilailuk Okada et al
EPI_ISL_888996	RSU Graha Juanda	Eijkman Institute for Molecular Biology, Ministry of Research and Technology/National Agency for Research and Innovation	Lydia V. Panggalo et al
EPI_ISL_539246,EPI_ISL_539247,EPI_ISL_539248,EPI_ISL_539249,EPI_ISL_539251,EPI_ISL_539252,EPI_ISL_539253,EPI_ISL_539254,EPI_ISL_539255,EPI_ISL_539256,EPI_ISL_539257,EPI_ISL_539258,EPI_ISL_539260,EPI_ISL_539262,EPI_ISL_539263,EPI_ISL_539264,EPI_ISL_539266,EPI_ISL_539267,EPI_ISL_539268,EPI_ISL_539270,EPI_ISL_539271,EPI_ISL_539272,EPI_ISL_539275,EPI_ISL_539277,EPI_ISL_539278,EPI_ISL_539279,EPI_ISL_5…	Hospital Universitario de La Ribera (Alzira, València)	SeqCOVID-SPAIN consortium/IBV(CSIC)	Olalla Martínez Macias et al
EPI_ISL_833496	RS PMI Bogor, Indonesia	Biosafety Level-3 Laboratory, Indonesian Institute of Sciences (LIPI)	Anik Budhi Dharmayanthi et al
EPI_ISL_458113	Gujarat Biotechnology Research Centre	Gujarat Biotechnology Research Centre	Amit Kanani et al
EPI_ISL_766259,EPI_ISL_825553,EPI_ISL_825571,EPI_ISL_826277,EPI_ISL_826278,EPI_ISL_826279,EPI_ISL_826280,EPI_ISL_825494,EPI_ISL_825575,EPI_ISL_804261,EPI_ISL_804262,EPI_ISL_804263,EPI_ISL_825493,EPI_ISL_825576,EPI_ISL_804264,EPI_ISL_825577,EPI_ISL_825578,EPI_ISL_825579,EPI_ISL_825492,EPI_ISL_825496,EPI_ISL_825580,EPI_ISL_825581,EPI_ISL_825495,EPI_ISL_837078,EPI_ISL_825582,EPI_ISL_825583,EPI_ISL_8…	Respiratory Virus Unit, National Infection Service, Public Health England	COVID-19 Genomics UK (COG-UK) Consortium	PHE Covid Sequencing Team et al
EPI_ISL_754331,EPI_ISL_837127,EPI_ISL_837222,EPI_ISL_837223,EPI_ISL_837128,EPI_ISL_837081,EPI_ISL_804336,EPI_ISL_837026,EPI_ISL_804337,EPI_ISL_855585,EPI_ISL_804338,EPI_ISL_837039,EPI_ISL_837075,EPI_ISL_837061,EPI_ISL_837212,EPI_ISL_754267,EPI_ISL_754268,EPI_ISL_754269,EPI_ISL_754278,EPI_ISL_754376,EPI_ISL_754270,EPI_ISL_754271,EPI_ISL_754272,EPI_ISL_754279,EPI_ISL_754280,EPI_ISL_754281,EPI_ISL_7…	Respiratory Virus Unit, National Infection Service, Public Health England	COVID-19 Genomics UK (COG-UK) Consortium	PHE Covid Sequencing Team et al
EPI_ISL_632934	Department of Acute Infectious Diseases Control and Prevention,Yunnan Provincial Center for Disease Control and Prevention	Department of Acute Infectious Diseases Control and Prevention,Yunnan Provincial Center for Disease Control and Prevention	Meiling Zhang et al
EPI_ISL_480315,EPI_ISL_480316,EPI_ISL_480317,EPI_ISL_480319	Hospital Clínica Bíblica	Charité Virology-University of Costa Rica	Andres Moreira-Soto et al
EPI_ISL_747482,EPI_ISL_747459,EPI_ISL_747460,EPI_ISL_747461,EPI_ISL_747462,EPI_ISL_747463,EPI_ISL_747483,EPI_ISL_747464	Ospedale San Bonifacio	Istituto Zooprofilattico Sperimentale delle Venezie	Adelaide Milani et al
EPI_ISL_426414	Sir M P Shah Government Medical College	Gujarat Biotechnology Research Centre	Ramesh Pandit et al
EPI_ISL_450818	Aneby VC	The Public Health Agency of Sweden	Ken Granath et al
EPI_ISL_965939,EPI_ISL_965932,EPI_ISL_965941,EPI_ISL_965935,EPI_ISL_965928,EPI_ISL_965929	Hospital Los Arcos del Mar Menor	Instituto de Salud Carlos III	Sandonís et al
EPI_ISL_613709,EPI_ISL_613964,EPI_ISL_613951	Laboratory of Molecular Biology, Blood Center of Ribeirão Preto, Faculty of Medicine of Ribeirão Preto, University of São Paulo	Laboratory of Molecular Biology, Blood Center of Ribeirão Preto, Faculty of Medicine of Ribeirão Preto, University of São Paulo	Svetoslav N Slavov et al
EPI_ISL_483835	Pandit Deendayal Upadhyay Government Medical College, Rajkot	Gujarat Biotechnology Research Centre	Dinesh Kumar et al
EPI_ISL_427804,EPI_ISL_427693,EPI_ISL_427689,EPI_ISL_427761,EPI_ISL_427683,EPI_ISL_427735,EPI_ISL_427739,EPI_ISL_427670,EPI_ISL_427694,EPI_ISL_427707,EPI_ISL_427753,EPI_ISL_417389,EPI_ISL_427651,EPI_ISL_417406,EPI_ISL_427751,EPI_ISL_427770,EPI_ISL_427702,EPI_ISL_427774	Centre for Infectious Diseases and Microbiology Public Health	NSW Health Pathology - Institute of Clinical Pathology and Medical Research; Westmead Hospital; University of Sydney	Arnott A et al
EPI_ISL_691686,EPI_ISL_871995,EPI_ISL_691687,EPI_ISL_691688,EPI_ISL_691689,EPI_ISL_691690,EPI_ISL_691691,EPI_ISL_691692,EPI_ISL_691693,EPI_ISL_691694,EPI_ISL_691695,EPI_ISL_691696,EPI_ISL_691697,EPI_ISL_691698,EPI_ISL_691699,EPI_ISL_539520,EPI_ISL_539521,EPI_ISL_862658,EPI_ISL_862656,EPI_ISL_539522,EPI_ISL_862657,EPI_ISL_862655,EPI_ISL_913054,EPI_ISL_913055,EPI_ISL_913056,EPI_ISL_913020,EPI_ISL_9…	Hospital Universitario de Ceuta	Instituto de Salud Carlos III	Iglesias-Caballero et al
EPI_ISL_913039	Complejo Hospitalario Xeral-Calde	Instituto de Salud Carlos III	Iglesias-Caballero et al
EPI_ISL_524720,EPI_ISL_586516,EPI_ISL_512062,EPI_ISL_514581,EPI_ISL_514599	B.J. Medical College and Civil hospital, Ahmedabad	Gujarat Biotechnology Research Centre	Nitin Savaliya et al
EPI_ISL_572398	Laboratory of Biology and Identification of Arboviruses	Pathogenic Microorganisms Variability Laboratory	Alexey Shchetinin et al
EPI_ISL_892280,EPI_ISL_892281,EPI_ISL_892282,EPI_ISL_892283,EPI_ISL_892284,EPI_ISL_892285,EPI_ISL_892286,EPI_ISL_892287,EPI_ISL_892288,EPI_ISL_892289,EPI_ISL_892290,EPI_ISL_892291,EPI_ISL_892292,EPI_ISL_892293,EPI_ISL_892294,EPI_ISL_892295,EPI_ISL_892296,EPI_ISL_892297,EPI_ISL_892298,EPI_ISL_892299,EPI_ISL_892273,EPI_ISL_892300,EPI_ISL_892301,EPI_ISL_892302,EPI_ISL_892303,EPI_ISL_892304,EPI_ISL_8…	Servicio de Microbiología. Hospital Universitario Donostia. OSI Donostialdea. Área de Enfermedades Infecciosas, Grupo de Infección Respiratoria y Resistencia Antimicrobiana. Instituto de Investigación Sanitaria Biodonostia	SeqCOVID-SPAIN consortium/IBV(CSIC)	Gustavo Cilla Eguiluz et al
EPI_ISL_436097	Prince Charles Hospital	Public Health Virology Laboratory, Forensics and Scientific Services, Queensland Health	Alyssa Pyke et al
EPI_ISL_477615,EPI_ISL_477616,EPI_ISL_477617,EPI_ISL_477618,EPI_ISL_477619,EPI_ISL_477620,EPI_ISL_477621,EPI_ISL_677728,EPI_ISL_677729,EPI_ISL_677730,EPI_ISL_677731,EPI_ISL_677732,EPI_ISL_677733,EPI_ISL_677734,EPI_ISL_677735,EPI_ISL_677736,EPI_ISL_677737,EPI_ISL_677738,EPI_ISL_677739,EPI_ISL_677740,EPI_ISL_677741,EPI_ISL_677742,EPI_ISL_677743,EPI_ISL_677744,EPI_ISL_677745,EPI_ISL_677746,EPI_ISL_6…	University of Szeged, Institute of Clinical Microbiology	National Laboratory of Virology, Szentágothai Research Centre	Endre Gábor Tóth et al
EPI_ISL_825145	Virus Research and Diagnostic Laboratory (DH-VRDL)	Department of Neurovirology, National Institute of Mental Health and Neurosciences (NIMHANS)	Chitra Pattabiraman et al
EPI_ISL_855552	Department of Infectious Diseases, Istituto Superiore di Sanità, Rome, Italy; Ospedali Riuniti, Laboratorio Virologia, Ancona, Italy	Istituto Superiore di Sanità (ISS)	Paola Stefanelli et al
EPI_ISL_529208,EPI_ISL_529209,EPI_ISL_529210,EPI_ISL_529211,EPI_ISL_529212	Laboratory Medicine, University of Washington	University of Washington, Laboratory Medicine	Roychoudhury et al
EPI_ISL_982526	Institut National d’Hygiène (INH)	Unité Mixte Internationale TransVIHMI (UMI 233 IRD – U1175 INSERM - Université de Montpellier)IRD (Institut de recherche pour le développement)	Mounerou SALOU et al
EPI_ISL_574433,EPI_ISL_538508,EPI_ISL_538504,EPI_ISL_576386,EPI_ISL_538505,EPI_ISL_538509,EPI_ISL_576387	National Institute of Health Research and Development	National Institute of Health Research and Development	Pawestri et al
EPI_ISL_487269	Laboratorio de Referencia Nacional de Virus Respiratorio. Instituto Nacional de Salud.	Laboratorio de Referencia Nacional de Biotecnología y Biología Molecular. Instituto Nacional de Salud.	Carlos Padilla Rojas et al
EPI_ISL_583853,EPI_ISL_583855,EPI_ISL_583856,EPI_ISL_583857,EPI_ISL_583858,EPI_ISL_583859,EPI_ISL_583860,EPI_ISL_583861,EPI_ISL_583862,EPI_ISL_583863,EPI_ISL_583864,EPI_ISL_583865,EPI_ISL_583866,EPI_ISL_583867,EPI_ISL_583868	Institute for Laboratory Diagnostics and Microbiology, Klinikum Klagenfurt am Worthersee	Bergthaler laboratory, CeMM Research Center for Molecular Medicine of the Austrian Academy of Sciences	Alexandra Popa et al
EPI_ISL_735409	Unidade de Pronto Atendimento Carlos Lourenco	Instituto Adolfo Lutz, Interdiciplinary Procedures Center, Strategic Laboratory	Claudio Tavares Sacchi et al
EPI_ISL_516988,EPI_ISL_516989	Public Health Authority of the Slovak Republic, Department of Medical Microbiology	Charite Universitatsmedizin Berlin, Institute of Virology	Victor M Corman et al
EPI_ISL_455455,EPI_ISL_455456	Instituto de Diagnostico y Referencia Epidemiologicos (INDRE)	Instituto de Diagnostico y Referencia Epidemiologicos (INDRE)	Rodriguez-Maldonado Abril et al
EPI_ISL_466696,EPI_ISL_466697,EPI_ISL_466698,EPI_ISL_466699,EPI_ISL_466700,EPI_ISL_466701,EPI_ISL_477039,EPI_ISL_466702,EPI_ISL_466703,EPI_ISL_466704,EPI_ISL_466705,EPI_ISL_466706,EPI_ISL_466707,EPI_ISL_466708,EPI_ISL_466709,EPI_ISL_466710,EPI_ISL_466711,EPI_ISL_477040,EPI_ISL_477087,EPI_ISL_477088,EPI_ISL_466712,EPI_ISL_466713,EPI_ISL_466714,EPI_ISL_466715,EPI_ISL_466716,EPI_ISL_466717,EPI_ISL_4…	BCCDC Public Health Laboratory	BCCDC Public Health Laboratory	Richard Harrigan et al
EPI_ISL_710547,EPI_ISL_710563,EPI_ISL_710554	Sestre Milosrdnice University Hospital Center	Ruđer Boškovic Institute; Forensic Science Centre Ivan Vučetić; University of Zagreb Faculty of Science	Robert Belužić et al
EPI_ISL_479759,EPI_ISL_479760,EPI_ISL_479762,EPI_ISL_479761,EPI_ISL_479763,EPI_ISL_479764,EPI_ISL_479765,EPI_ISL_479766,EPI_ISL_479767,EPI_ISL_479768,EPI_ISL_479769,EPI_ISL_479770,EPI_ISL_479771,EPI_ISL_479772,EPI_ISL_479773,EPI_ISL_479774,EPI_ISL_479775,EPI_ISL_513265,EPI_ISL_513266,EPI_ISL_513267,EPI_ISL_513268,EPI_ISL_513269,EPI_ISL_513270,EPI_ISL_513271,EPI_ISL_513272,EPI_ISL_513273,EPI_ISL_5…	University of Miami Immunology and Histocompatibility Laboratory	University of Miami Immunology and Histocompatibility Laboratory	Emilio Margolles-Clark et al
EPI_ISL_831426,EPI_ISL_831405,EPI_ISL_831407,EPI_ISL_831404,EPI_ISL_831423,EPI_ISL_831417,EPI_ISL_831419,EPI_ISL_831412,EPI_ISL_831413,EPI_ISL_831418	Labor Dr. Krause & Kollegen MVZ GmbH	Robert Koch Institute, Influenza and respiratory viruses FG17 & Bioinformatics MF1, Berlin, Germany	Dr. Lorentz et al
EPI_ISL_840816,EPI_ISL_840819,EPI_ISL_840820,EPI_ISL_840821,EPI_ISL_840824,EPI_ISL_840826,EPI_ISL_840827,EPI_ISL_840828,EPI_ISL_840835,EPI_ISL_840837,EPI_ISL_840839,EPI_ISL_840840,EPI_ISL_840841,EPI_ISL_840842,EPI_ISL_840843,EPI_ISL_840846,EPI_ISL_840847,EPI_ISL_840848,EPI_ISL_840849,EPI_ISL_840852,EPI_ISL_840855,EPI_ISL_840857,EPI_ISL_840858,EPI_ISL_840859,EPI_ISL_840861,EPI_ISL_840863,EPI_ISL_8…	Wales Specialist Virology Centre Sequencing lab: Pathogen Genomics Unit	Public Health Wales Microbiology Cardiff Wales Specialist Virology Centre	Catherine Moore et al
EPI_ISL_849763	Molecular Biology, IZS Sicilia	Molecular Biology, IZS Sicilia	Reale et al
EPI_ISL_906851,EPI_ISL_906848,EPI_ISL_906852,EPI_ISL_906850,EPI_ISL_906849	Respiratory Viruses Branch, Centers for Disease Control and Prevention	Respiratory Viruses Branch, Centers for Disease Control and Prevention	Tao et al
EPI_ISL_575330,EPI_ISL_575329	National Institute for Viral Disease Control and Prevention, China CDC	National Institute for Viral Disease Control and Prevention, China CDC	Rongbao Gao et al
EPI_ISL_537996,EPI_ISL_537997,EPI_ISL_537998,EPI_ISL_537999,EPI_ISL_538000,EPI_ISL_538001,EPI_ISL_538002	Servicio de Microbiologia. Hospital Arnau de Vilanova	SeqCOVID-SPAIN consortium/IBV(CSIC)	Victoria Dominguez et al
EPI_ISL_936489	Hospital Raja Perempuan Zainab II	Institute for Medical Research, Infectious Disease Research Centre, National Institutes of Health, Ministry of Health Malaysia	Suppiah J et al
EPI_ISL_593902	Sentinelles, Limay	National Reference Center for Viruses of Respiratory Infections, Institut Pasteur, Paris	Sylvie Behillil et al
EPI_ISL_456160,EPI_ISL_456168,EPI_ISL_456189,EPI_ISL_456190,EPI_ISL_456191,EPI_ISL_456192,EPI_ISL_456193,EPI_ISL_456241,EPI_ISL_456259	Waikato Hospital	Institute of Environmental Science and Research (ESR)	Matt Storey et al
EPI_ISL_710595,EPI_ISL_676520,EPI_ISL_710597,EPI_ISL_661274,EPI_ISL_676489,EPI_ISL_676490,EPI_ISL_661275,EPI_ISL_661276,EPI_ISL_661277,EPI_ISL_676491,EPI_ISL_775549,EPI_ISL_766694,EPI_ISL_775572,EPI_ISL_831980,EPI_ISL_775573,EPI_ISL_831981,EPI_ISL_775574,EPI_ISL_766714,EPI_ISL_676531,EPI_ISL_676532,EPI_ISL_661278,EPI_ISL_661280,EPI_ISL_710596,EPI_ISL_661281,EPI_ISL_831973,EPI_ISL_766592,EPI_ISL_7…	Klinisk mikrobiologi	The Public Health Agency of Sweden	Department of Microbiology et al
EPI_ISL_956403	Institute for prevention, treatment and rehabilitation of cardiovascular diseases - Ohrid	Research Center for Genetic Engineering and Biotechnology "Georgi D. Efremov” , Macedonian Academy of Sciences and Arts	Aleksandar J. Dimovski et al
EPI_ISL_735414,EPI_ISL_735415,EPI_ISL_735417	Unidade de Pronto Atendimento de Agenor de Campos	Instituto Adolfo Lutz, Interdiciplinary Procedures Center, Strategic Laboratory	Claudio Tavares Sacchi et al
EPI_ISL_852748,EPI_ISL_852802,EPI_ISL_852804,EPI_ISL_852737,EPI_ISL_852801,EPI_ISL_852785,EPI_ISL_852786,EPI_ISL_852783,EPI_ISL_852800,EPI_ISL_852799,EPI_ISL_852795,EPI_ISL_852790,EPI_ISL_852774,EPI_ISL_852770,EPI_ISL_852762,EPI_ISL_852779,EPI_ISL_852668,EPI_ISL_852661,EPI_ISL_852709,EPI_ISL_852671,EPI_ISL_852667,EPI_ISL_852659,EPI_ISL_852660,EPI_ISL_852798,EPI_ISL_852797,EPI_ISL_852796,EPI_ISL_8…	Institute of Virology, Medical Center, University of Freiburg, Freiburg, Germany	Institute of Virology, Clinial Virus Genomics, Medical Center, University of Freiburg, Freiburg, Germany	Jonas Fuchs et al
EPI_ISL_984996,EPI_ISL_985000,EPI_ISL_985032,EPI_ISL_984995	U.O. Igiene, Ospedale Policlinico San Martino	U.O. Igiene, Ospedale Policlinico San Martino	Bruzzone Bianca et al
EPI_ISL_416997,EPI_ISL_417004,EPI_ISL_417006,EPI_ISL_417008,EPI_ISL_417009,EPI_ISL_417011,EPI_ISL_417012,EPI_ISL_417013,EPI_ISL_417014,EPI_ISL_417015,EPI_ISL_417016,EPI_ISL_417017,EPI_ISL_417018,EPI_ISL_417019,EPI_ISL_417020,EPI_ISL_417021,EPI_ISL_417022,EPI_ISL_417023,EPI_ISL_417025	Department of Clinical Microbiology	GIGA Medical Genomics	Durkin Keith et al
EPI_ISL_534245,EPI_ISL_560987	Kliniskt mikrobiologiska laboratoriet	The Public Health Agency of Sweden	Anna-Malin Linde et al
EPI_ISL_792525	Laboratorio del Hospital Interzonal General de Agudos Evita	Grupo de Genómica y Bioinformática del Instituto de Investigación de la Cadena Láctea CONICET-INTA on behalf of 'Proyecto Argentino Interinstitucional de genomica de SARS-CoV-2' (PAIS Consortium)	Amadio et al
EPI_ISL_476025	Laboratoire de Recherche et d'Analyses Médicales de la Gendarmerie Royale	Laboratoire de Recherche et d'Analyses Médicales de la Gendarmerie Royale	Sanaâ LEMRISS et al
EPI_ISL_427553,EPI_ISL_427554,EPI_ISL_427555,EPI_ISL_427556,EPI_ISL_427557,EPI_ISL_427558,EPI_ISL_427559,EPI_ISL_427560,EPI_ISL_427561,EPI_ISL_427562,EPI_ISL_427563,EPI_ISL_427564,EPI_ISL_427565,EPI_ISL_427566,EPI_ISL_427567,EPI_ISL_427568,EPI_ISL_427569,EPI_ISL_427570,EPI_ISL_427571,EPI_ISL_427572,EPI_ISL_427573,EPI_ISL_427574,EPI_ISL_427575,EPI_ISL_427576,EPI_ISL_427577,EPI_ISL_427578,EPI_ISL_4…	NewYork-Presbyterian & Mason Lab	Mason Lab	Daniel J. Butler et al
EPI_ISL_492911,EPI_ISL_492880,EPI_ISL_492877,EPI_ISL_492851,EPI_ISL_492882,EPI_ISL_492844,EPI_ISL_492906,EPI_ISL_492885,EPI_ISL_492837,EPI_ISL_492905,EPI_ISL_492843,EPI_ISL_492850,EPI_ISL_492852,EPI_ISL_492879,EPI_ISL_492887,EPI_ISL_492869,EPI_ISL_492874,EPI_ISL_492856,EPI_ISL_492840,EPI_ISL_492888,EPI_ISL_492872,EPI_ISL_492865,EPI_ISL_492890,EPI_ISL_492845,EPI_ISL_492847,EPI_ISL_492864,EPI_ISL_4…	Royal Free Hospital / Health Services Laboratories	Wellcome Sanger Institute for the COVID-19 Genomics UK (COG-UK) consortium	Tanzina Haque et al
EPI_ISL_461487,EPI_ISL_461500	B.J. Medical College and Civil hospital	Gujarat Biotechnology Research Centre	Priti Pandita et al
EPI_ISL_722004,EPI_ISL_722023,EPI_ISL_722012,EPI_ISL_721987,EPI_ISL_722029,EPI_ISL_722030,EPI_ISL_722031,EPI_ISL_722005,EPI_ISL_722000,EPI_ISL_722013,EPI_ISL_722042,EPI_ISL_722043,EPI_ISL_722002,EPI_ISL_722018,EPI_ISL_722032,EPI_ISL_722044,EPI_ISL_722033,EPI_ISL_722045,EPI_ISL_721992,EPI_ISL_722034,EPI_ISL_722014,EPI_ISL_722035,EPI_ISL_722009,EPI_ISL_722003,EPI_ISL_722036,EPI_ISL_722025,EPI_ISL_7…	Hospital das Clínicas Universidade de São Paulo Medical School	Laboratório de Parasitologia Médica - Instituto de Medicina Tropical - Universidade de São Paulo	Brazil-UK Centre for Arbovirus Discovery Diagnosis Genomics et al
EPI_ISL_699659,EPI_ISL_699660,EPI_ISL_699661,EPI_ISL_699662,EPI_ISL_699663,EPI_ISL_699664,EPI_ISL_699665,EPI_ISL_699666,EPI_ISL_699667,EPI_ISL_699668,EPI_ISL_723045,EPI_ISL_699669,EPI_ISL_699670,EPI_ISL_699671,EPI_ISL_699672,EPI_ISL_699673,EPI_ISL_699674,EPI_ISL_699675,EPI_ISL_699676,EPI_ISL_699677,EPI_ISL_699678,EPI_ISL_699679,EPI_ISL_699680,EPI_ISL_699681,EPI_ISL_699682,EPI_ISL_699683,EPI_ISL_6…	Hematopathology Laboratory, ACTREC, TMC	Hematopathology Laboratory, ACTREC, TMC	Hematopathology Laboratory et al
EPI_ISL_778868	Virology Lab, Ospedali Riuniti di Ancona	Dipartimento di Scienze Biomediche e Cliniche, L.Sacco, Università di Milano	Alessia Lai et al
EPI_ISL_455023	Government Medical College, Vadodara	Gujarat Biotechnology Research Centre	Apurvasinh Puvar et al
EPI_ISL_418003,EPI_ISL_418007,EPI_ISL_418008,EPI_ISL_418019,EPI_ISL_418020,EPI_ISL_418021,EPI_ISL_418022	H Braga	Instituto Nacional de Saude (INSA)	Guiomar et al et al
EPI_ISL_947260	RSU Bunda Mulia	Eijkman Institute for Molecular Biology, Ministry of Research and Technology/National Agency for Research and Innovation	Iskandar Adnan et al
EPI_ISL_877435	National laboratory of health, environment and food Maribor	Institute of Microbiology and Immunology, Faculty of Medicine, University of Ljubljana	Samo Zakotnik et al
EPI_ISL_961747,EPI_ISL_961730,EPI_ISL_961734	Dipartimento Prevenzione Avezzano-Servizio Igiene epidemiologia Sanità Pubblica	Istituto Zooprofilattico Sperimentale dell’Abruzzo e Molise “G. Caporale”	Lorusso A et al
EPI_ISL_961759,EPI_ISL_471411,EPI_ISL_471412,EPI_ISL_471413,EPI_ISL_527543,EPI_ISL_527538,EPI_ISL_527521,EPI_ISL_527544,EPI_ISL_513624,EPI_ISL_513625,EPI_ISL_513626,EPI_ISL_591087,EPI_ISL_513627,EPI_ISL_527545,EPI_ISL_527546,EPI_ISL_527498,EPI_ISL_527489,EPI_ISL_527495,EPI_ISL_527539,EPI_ISL_527499,EPI_ISL_527491,EPI_ISL_527547,EPI_ISL_527524,EPI_ISL_527492,EPI_ISL_527494,EPI_ISL_527532,EPI_ISL_5…	Viral Respiratory Lab, National Institute for Biomedical Research (INRB)	Pathogen Sequencing Lab, National Institute for Biomedical Research (INRB)	Placide Mbala-Kingebeni et al
EPI_ISL_524590,EPI_ISL_459258,EPI_ISL_459243	Department of Pathology, University of Cambridge	Wellcome Sanger Institute for the COVID-19 Genomics UK (COG-UK) Consortium	Luke W Meredith et al
EPI_ISL_491161,EPI_ISL_491160,EPI_ISL_491159,EPI_ISL_525423,EPI_ISL_491167,EPI_ISL_491166,EPI_ISL_491169,EPI_ISL_491168,EPI_ISL_491170,EPI_ISL_491162,EPI_ISL_491163,EPI_ISL_491171,EPI_ISL_491164,EPI_ISL_491165,EPI_ISL_525426,EPI_ISL_525427,EPI_ISL_525428	Oman-National Influenza Center	Biotechnology & OMICs Laboratory	Sajjad Asaf et al
EPI_ISL_640020,EPI_ISL_640028,EPI_ISL_640065,EPI_ISL_700572,EPI_ISL_700597,EPI_ISL_700489	Mitchells Plain Hospital wc MPH	NHLS/UCT	Arash Iranzadeh et al
EPI_ISL_888675,EPI_ISL_888674,EPI_ISL_888676	Center of Advanced Studies and Technology, Molecular Genetics Laboratory	Center of Advanced Studies and Technology, Molecular Genetics Laboratory	De Fabritiis Simone et al
EPI_ISL_539288,EPI_ISL_539231,EPI_ISL_539221,EPI_ISL_539243,EPI_ISL_539225,EPI_ISL_539244,EPI_ISL_539229,EPI_ISL_539228,EPI_ISL_539227,EPI_ISL_539223,EPI_ISL_539222	Servicio de Microbiologia. Hospital Clinico Universitario de Valencia	SeqCOVID-SPAIN consortium/IBV(CSIC)	Maria Dolores Ocete et al
EPI_ISL_708823	Vibharam Hospital	National Institute of Health, Department of Medical Sciences, Ministry of Public Health, Thailand	Pilailuk Okada et al
EPI_ISL_429256	Health Sciences Technology Park, Avicena, 8, 18016 Granada. Spain	Sequencing and Bioinformatics Service FISABIO-Public Health	Joaquín Mendoza et al
EPI_ISL_590690	CCC,Veraval	Gujarat Biotechnology Research Centre	Apurvasinh Puvar et al
EPI_ISL_845548,EPI_ISL_845549,EPI_ISL_845551,EPI_ISL_845550,EPI_ISL_845553,EPI_ISL_845552,EPI_ISL_845554,EPI_ISL_845564,EPI_ISL_845565,EPI_ISL_845545,EPI_ISL_845562,EPI_ISL_845560,EPI_ISL_845557,EPI_ISL_845561,EPI_ISL_845558	National Public Health Laboratory, Cameroon	African Centre of Excellence for Genomics of Infectious Diseases (ACEGID), Redeemer's University	Oluniyi P.E. et al et al
EPI_ISL_956310	RSUD Dr. M. Soewandhie	Institute of Tropical Disease, Universitas Airlangga	Aldise M Nastri et al
EPI_ISL_903685,EPI_ISL_903670	GA Department of Public Health Laboratory	Genomics and Discovery, Respiratory Viruses Branch, Division of Viral Diseases, Centers for Disease Control and Prevention	Krista Queen et al
EPI_ISL_514637,EPI_ISL_514643,EPI_ISL_514650,EPI_ISL_514652,EPI_ISL_514657	M Health Fairview St. Joseph's Hospital	Minnesota Department of Health, Public Health Laboratory	Matt Plumb et al
EPI_ISL_586552	Government Hospital,Veraval	Gujarat Biotechnology Research Centre	Pinal Trivedi et al
EPI_ISL_437187	Siloam Hospitals	Institute of Tropical Disease, Universitas Airlangga	Kazufumi Shimizu et al
EPI_ISL_622945,EPI_ISL_622958,EPI_ISL_622944,EPI_ISL_622942,EPI_ISL_622954	National Health Laboratory Service	National Institute for Communicable Diseases of the National Health Laboratory Service	Allam M et al
EPI_ISL_528538	Alsafar	Alsafar	Andreas Henschel et al
EPI_ISL_508168,EPI_ISL_508202,EPI_ISL_508203,EPI_ISL_508156,EPI_ISL_508157,EPI_ISL_508158,EPI_ISL_508159,EPI_ISL_508160,EPI_ISL_508161,EPI_ISL_508162,EPI_ISL_508163,EPI_ISL_508164,EPI_ISL_508165,EPI_ISL_508166,EPI_ISL_508167,EPI_ISL_508169,EPI_ISL_508170,EPI_ISL_508171,EPI_ISL_508172,EPI_ISL_508173,EPI_ISL_508174,EPI_ISL_508175,EPI_ISL_508176,EPI_ISL_508177,EPI_ISL_508178,EPI_ISL_508179,EPI_ISL_5…	All india institute of Medical Sciences Rishikesh	National Institute of Biomedical Genomics	Arindam Maitra et al
EPI_ISL_477163	Laboratory of Dr. John Lednicky	University of Florida	John A. Lednicky et al
EPI_ISL_418251	HOSPITAL UNIVERSITARIO LA PAZ	Instituto de Salud Carlos III	Iglesias-Caballero et al
EPI_ISL_914795	HOSPITAL DR. FERNANDO ESCALANTE PRADILLA	Inciensa, Instituto Costarricense de Investigación y Enseñanza en Nutrición y Salud	Francisco Duarte et al
EPI_ISL_682250,EPI_ISL_682251,EPI_ISL_682252	AREA DE SALUD ESCAZU (COOPESANA)	Inciensa, Instituto Costarricense de Investigación y Enseñanza en Nutrición y Salud	Francisco Duarte et al
EPI_ISL_486852	CDRI/SGPGI	CSIR-CDRI/SGPGI	Saumya Sarkar et al
EPI_ISL_454497,EPI_ISL_454498,EPI_ISL_454499,EPI_ISL_454500,EPI_ISL_454501,EPI_ISL_454502,EPI_ISL_454503,EPI_ISL_454504,EPI_ISL_454505,EPI_ISL_454506,EPI_ISL_454507,EPI_ISL_454508,EPI_ISL_454509,EPI_ISL_454510,EPI_ISL_454511,EPI_ISL_454512,EPI_ISL_454513,EPI_ISL_454514,EPI_ISL_454515,EPI_ISL_454516,EPI_ISL_454517,EPI_ISL_454518,EPI_ISL_454519,EPI_ISL_454520	RSE "National Center for Biotechnology"	RSE "National Center for Biotechnology"	Alexandr Shevtsov et al
EPI_ISL_566085,EPI_ISL_566086,EPI_ISL_566087,EPI_ISL_566088,EPI_ISL_566089,EPI_ISL_566090,EPI_ISL_566091,EPI_ISL_566092,EPI_ISL_566093,EPI_ISL_566094,EPI_ISL_566095,EPI_ISL_566096,EPI_ISL_566097,EPI_ISL_566098,EPI_ISL_566099,EPI_ISL_566100,EPI_ISL_566101,EPI_ISL_566102,EPI_ISL_566103,EPI_ISL_566104,EPI_ISL_566105,EPI_ISL_566106,EPI_ISL_566107	GA Department of Public Health Laboratory	Pathogen Discovery, Respiratory Viruses Branch, Division of Viral Diseases, Centers for Disease Control and Prevention	Jing Zhang et al
EPI_ISL_478289,EPI_ISL_478290,EPI_ISL_478291,EPI_ISL_478292,EPI_ISL_478293,EPI_ISL_478294,EPI_ISL_478295,EPI_ISL_478296,EPI_ISL_478297,EPI_ISL_478298,EPI_ISL_478299,EPI_ISL_478300,EPI_ISL_478301,EPI_ISL_478303,EPI_ISL_478304,EPI_ISL_478305,EPI_ISL_478306,EPI_ISL_478307,EPI_ISL_478308,EPI_ISL_478309,EPI_ISL_478310,EPI_ISL_478311,EPI_ISL_478312,EPI_ISL_478313,EPI_ISL_478314,EPI_ISL_478315,EPI_ISL_4…	University Hospitals Of Leicester NHS Trust and DeepSeq Nottingham	COVID-19 Genomics UK (COG-UK) Consortium	Christopher Holmes et al
EPI_ISL_471543,EPI_ISL_583500	Centro de Saude I Tacito Leite de Carvalho e Silva	Instituto Adolfo Lutz, Interdiciplinary Procedures Center, Strategic Laboratory	Claudio Tavares Sacchi et al
EPI_ISL_735413	Militello Centro de Diagnosticos e Biopesquisa Clinica	Instituto Adolfo Lutz, Interdiciplinary Procedures Center, Strategic Laboratory	Claudio Tavares Sacchi et al
EPI_ISL_535845,EPI_ISL_535939,EPI_ISL_535940,EPI_ISL_560413,EPI_ISL_560414	Centre de SSS D'Arthabaska-et-de-l'érable - Hôtel-Dieu	Laboratoire de santé publique du Québec	Sandrine Moreira et al
EPI_ISL_560318,EPI_ISL_547586,EPI_ISL_560322,EPI_ISL_560323,EPI_ISL_547587,EPI_ISL_561339,EPI_ISL_547588,EPI_ISL_561340,EPI_ISL_547585,EPI_ISL_561341,EPI_ISL_561342,EPI_ISL_560324,EPI_ISL_561343,EPI_ISL_547592,EPI_ISL_547593,EPI_ISL_547589,EPI_ISL_547590,EPI_ISL_547591	Civil Hospital, Panchkula	CSIR-Institute of Microbial Technology	Kanika Bansal et al
EPI_ISL_569953,EPI_ISL_569950,EPI_ISL_569957,EPI_ISL_569951,EPI_ISL_569977,EPI_ISL_569959,EPI_ISL_569952,EPI_ISL_569949,EPI_ISL_569973,EPI_ISL_569970,EPI_ISL_569968,EPI_ISL_569971,EPI_ISL_569976,EPI_ISL_569966,EPI_ISL_569964,EPI_ISL_569979,EPI_ISL_569955,EPI_ISL_569954,EPI_ISL_569965,EPI_ISL_569958,EPI_ISL_569960,EPI_ISL_569978,EPI_ISL_569969,EPI_ISL_569961,EPI_ISL_569972,EPI_ISL_569975,EPI_ISL_5…	Unity Health Toronto	Ontario Institute for Cancer Research	Ramzi Fattouh et al
EPI_ISL_445273,EPI_ISL_445274,EPI_ISL_445278	LABORATORIO TORRE MEDICA LTDA.	Instituto de Salud Publica de Chile	Andrés E Castillo et al
EPI_ISL_913339,EPI_ISL_913340,EPI_ISL_913341,EPI_ISL_913342	Unilabs, Mikrobiologiska laboratoriet	The Public Health Agency of Sweden	Anna-Malin Linde et al
EPI_ISL_947255	RSU Meilia	Eijkman Institute for Molecular Biology, Ministry of Research and Technology/National Agency for Research and Innovation	Edison Johar et al
EPI_ISL_524454,EPI_ISL_524453,EPI_ISL_524451,EPI_ISL_524450,EPI_ISL_524452	Microbiology & Immunology, University of North Carolina	Microbiology & Immunology, University of North Carolina	Bailey et al
EPI_ISL_456144,EPI_ISL_456117,EPI_ISL_456118,EPI_ISL_456119,EPI_ISL_456146,EPI_ISL_456145,EPI_ISL_456148,EPI_ISL_456122,EPI_ISL_456123,EPI_ISL_456124,EPI_ISL_456120,EPI_ISL_456116,EPI_ISL_456153,EPI_ISL_456125,EPI_ISL_456154,EPI_ISL_456126,EPI_ISL_456127,EPI_ISL_456128,EPI_ISL_456155,EPI_ISL_456131,EPI_ISL_456149,EPI_ISL_456156,EPI_ISL_456134,EPI_ISL_456135,EPI_ISL_456136,EPI_ISL_456138,EPI_ISL_4…	Instituto Nacional de Salud - Unidad de Secuenciación y Análisis Genómico	Instituto Nacional de Salud, Universidad Cooperativa de Colombia, Instituto Alexander von Humboldt, Imperial College-London, London School of Hygiene & Tropical Medicine	Katherine Laiton-Donato et al
EPI_ISL_900531,EPI_ISL_645216,EPI_ISL_663227,EPI_ISL_663228,EPI_ISL_663229,EPI_ISL_663230,EPI_ISL_663231,EPI_ISL_663232,EPI_ISL_663233,EPI_ISL_663234,EPI_ISL_663235,EPI_ISL_663236,EPI_ISL_663237,EPI_ISL_663238,EPI_ISL_663239,EPI_ISL_663240,EPI_ISL_663241,EPI_ISL_663242,EPI_ISL_779785,EPI_ISL_768822,EPI_ISL_707781,EPI_ISL_707782	CHU Poitiers	CNR Virus des Infections Respiratoires - France SUD	Antonin Bal et al
EPI_ISL_640016,EPI_ISL_640027,EPI_ISL_700497	George Hospital wc GRH	NHLS/UCT	Arash Iranzadeh et al
EPI_ISL_483863	Department of Microbiology, Government Medical College, Surat	Gujarat Biotechnology Research Centre	Zarna Patel et al
EPI_ISL_833510	RS Melania, Bogor, Indonesia	Biosafety Level-3 Laboratory, Indonesian Institute of Sciences (LIPI)	Anik Budhi Dharmayanthi et al
EPI_ISL_430819	Center of Scientific Excellence for Influenza Viruses,National Research Centre (NRC), Egypt.	Center of Scientific Excellence for Influenza Viruses,National Research Centre (NRC), Egypt.	Mohamed Ahmed Ali et al
EPI_ISL_792306,EPI_ISL_792307,EPI_ISL_792308,EPI_ISL_792309,EPI_ISL_792310,EPI_ISL_792311,EPI_ISL_792312,EPI_ISL_792313,EPI_ISL_792314,EPI_ISL_792315,EPI_ISL_792316,EPI_ISL_792317,EPI_ISL_792318,EPI_ISL_792319	Laboratorio del Hospital El Cruce Dr. Néstor C. Kirchner	Área de Secuenciación del Laboratorio de Virología del Hospital de Niños Dr. Ricardo Gutierrez on behalf of 'Proyecto Argentino Interinstitucional de genomica de SARS-CoV-2' (PAIS Consortium)	Nabaes Jodar et al
EPI_ISL_634976	Institute of Molecular Biology and Biotechnology, National Institutes of Health	Institute of Molecular Biology and Biotechnology, National Institutes of Health	Schwem et al
EPI_ISL_930836,EPI_ISL_930838,EPI_ISL_930839,EPI_ISL_930841	Virology, ICAR-National Research Centre on Equines	Virology, ICAR-National Research Centre on Equines	Gulati et al
EPI_ISL_960118	George Hospital wc GRH	National Health Laboratory Service/UCT	Arash Iranzadeh et al
EPI_ISL_860271,EPI_ISL_860272,EPI_ISL_860279,EPI_ISL_860273,EPI_ISL_962904,EPI_ISL_962905,EPI_ISL_962906,EPI_ISL_964972,EPI_ISL_964952,EPI_ISL_964973,EPI_ISL_964974,EPI_ISL_449786,EPI_ISL_471174,EPI_ISL_481209,EPI_ISL_481210,EPI_ISL_481212,EPI_ISL_481207,EPI_ISL_481213,EPI_ISL_549092,EPI_ISL_549093,EPI_ISL_549094,EPI_ISL_549095,EPI_ISL_549096,EPI_ISL_549097,EPI_ISL_549098,EPI_ISL_549099,EPI_ISL_5…	Ostfold Hospital Trust - Kalnes, Centre for Laboratory Medicine, Section for gene technology and infection serology	Norwegian Institute of Public Health, Department of Virology	Kathrine Stene-Johansen et al
EPI_ISL_956339,EPI_ISL_984663,EPI_ISL_984665,EPI_ISL_984666,EPI_ISL_984667,EPI_ISL_984664,EPI_ISL_984668,EPI_ISL_984669	University Hospitals Translational Laboratory (UHTL), University Hospitals	University Hospitals Translational Laboratory (UHTL), University Hospitals	Sadri et al
EPI_ISL_965927,EPI_ISL_965931	Servicio Murciano de Salud	Instituto de Salud Carlos III	Sandonís et al
EPI_ISL_436688,EPI_ISL_436689	Victorian Infectious Diseases Reference Laboratory (VIDRL)	Microbiological Diagnostic Unit Public Health Laboratory and Victorian Infectious Diseases Reference Laboratory, The Peter Doherty Institute for Infection & Immunity	Caly L. et al
EPI_ISL_681321,EPI_ISL_681320	Pathology and Laboratory Medicine, UW-Madison	Pathology and Laboratory Medicine, UW-Madison	Moreno et al
EPI_ISL_700535,EPI_ISL_700579,EPI_ISL_700541,EPI_ISL_700437	Kwanokuthula CDC wc KWA	NHLS/UCT	Houriiyah Tegally et al
EPI_ISL_909737	Institute of Biocides and Medical Ecology, Belgrade, Serbia	Virology Department, Institute of microbiology and immunology, Faculty of Medicine University of Blegrade	Banko Ana et al
EPI_ISL_754904,EPI_ISL_754906,EPI_ISL_754907,EPI_ISL_754905,EPI_ISL_754913,EPI_ISL_754912,EPI_ISL_754909,EPI_ISL_754910,EPI_ISL_754902,EPI_ISL_754903,EPI_ISL_754908,EPI_ISL_754911	Laboratory Diagnostics and Clinical Immunology of Developmental Age, Medical University of Warsaw	genXone SA, Research & Development Laboratory; The Faculty of Mathematics, Informatics and Mechanics of the University of Warsaw	Maciej Sykulski et al
EPI_ISL_434692,EPI_ISL_434694,EPI_ISL_434693,EPI_ISL_515469	Bamrasnaradura hospital	National Institute of Health. Department of medical Sciences, Ministry of Public Health, Thailand	Pilailuk et al
EPI_ISL_891254	IHU Méditerranée Infection	IHU Méditerranée Infection	Philippe Colson et al. et al
EPI_ISL_469040	GMERS Medical College & Hospital	Gujarat Biotechnology Research Centre	Snehal Bagatharia et al
EPI_ISL_479903,EPI_ISL_479904,EPI_ISL_479905,EPI_ISL_479906,EPI_ISL_479907,EPI_ISL_479908,EPI_ISL_479909,EPI_ISL_479910,EPI_ISL_479911,EPI_ISL_479912	Himeji City Institute of Environment and Health	Pathogen Genomics Center, National Institute of Infectious Diseases	Tsuyoshi Sekizuka et al
EPI_ISL_837579,EPI_ISL_837580,EPI_ISL_837581,EPI_ISL_837582,EPI_ISL_837583,EPI_ISL_837551,EPI_ISL_837584,EPI_ISL_837585,EPI_ISL_837586,EPI_ISL_837587,EPI_ISL_837588,EPI_ISL_837589,EPI_ISL_837590,EPI_ISL_837591,EPI_ISL_837592,EPI_ISL_837593,EPI_ISL_837594,EPI_ISL_837595,EPI_ISL_837596,EPI_ISL_837552	Laboratorio Nacional de Salud	Laboratory of Respiratory Viruses and Measles, Oswaldo Cruz Institute, FIOCRUZ	Paola Resende et al
EPI_ISL_912621	HOPITAL YVES LE FOLL Laboratoire de Biologie Médicale	National Reference Center for Viruses of Respiratory Infections, Institut Pasteur, Paris	Marion Barbet et al
EPI_ISL_770018,EPI_ISL_770019	Laboratorio Cenahce	Inciensa, Instituto Costarricense de Investigación y Enseñanza en Nutrición y Salud	Francisco Duarte et al
EPI_ISL_535829,EPI_ISL_535905,EPI_ISL_535906,EPI_ISL_535964,EPI_ISL_535965,EPI_ISL_536019,EPI_ISL_536107	Hôpital de Chicoutimi	Laboratoire de santé publique du Québec	Sandrine Moreira et al
EPI_ISL_576170,EPI_ISL_450802,EPI_ISL_576171,EPI_ISL_450803,EPI_ISL_424881,EPI_ISL_424882,EPI_ISL_424883,EPI_ISL_424884,EPI_ISL_424885,EPI_ISL_424886	PA Department of Health, Bureau of Laboratories	Pathogen Discovery, Respiratory Viruses Branch, Division of Viral Diseases, Centers for Disease Control and Prevention	Yan Li et al
EPI_ISL_861109,EPI_ISL_861118,EPI_ISL_861119,EPI_ISL_861120,EPI_ISL_861111,EPI_ISL_861121,EPI_ISL_861110,EPI_ISL_861112,EPI_ISL_861122,EPI_ISL_861123,EPI_ISL_861124,EPI_ISL_861113,EPI_ISL_861125,EPI_ISL_861126,EPI_ISL_861127,EPI_ISL_861128,EPI_ISL_861129,EPI_ISL_861114,EPI_ISL_861130,EPI_ISL_861131,EPI_ISL_861132,EPI_ISL_861133,EPI_ISL_896338,EPI_ISL_896339,EPI_ISL_896294,EPI_ISL_896340,EPI_ISL_8…	New York Presbyterian Hospital	Wadsworth Center, New York State Department of Health	Kirsten St. George et al
EPI_ISL_794668	Royal Hobart Hospital	Royal Hobart Hospital	Janelle Maskell et al
EPI_ISL_443554,EPI_ISL_443629,EPI_ISL_443414,EPI_ISL_443408,EPI_ISL_443676,EPI_ISL_443682,EPI_ISL_443656,EPI_ISL_443671,EPI_ISL_443546,EPI_ISL_443517,EPI_ISL_443663,EPI_ISL_443662,EPI_ISL_443411,EPI_ISL_443538,EPI_ISL_443644,EPI_ISL_443515,EPI_ISL_443421,EPI_ISL_443448,EPI_ISL_443410,EPI_ISL_443529,EPI_ISL_443442,EPI_ISL_443413,EPI_ISL_443596,EPI_ISL_443466,EPI_ISL_443541,EPI_ISL_443659,EPI_ISL_4…	Department of Pathology, University of Cambridge	Wellcome Sanger Institute for the COVID-19 Genomics UK (COG-UK) consortium	Luke W Meredith et al
EPI_ISL_439558,EPI_ISL_439883,EPI_ISL_439556,EPI_ISL_439893,EPI_ISL_439641,EPI_ISL_439868,EPI_ISL_439937,EPI_ISL_439663,EPI_ISL_439614,EPI_ISL_439865,EPI_ISL_439871,EPI_ISL_439915,EPI_ISL_439553,EPI_ISL_439583,EPI_ISL_440003,EPI_ISL_440064,EPI_ISL_440057,EPI_ISL_440096,EPI_ISL_439989,EPI_ISL_440076,EPI_ISL_440090,EPI_ISL_440017,EPI_ISL_440012,EPI_ISL_440082,EPI_ISL_439996,EPI_ISL_440083,EPI_ISL_4…	Department of Pathology, University of Cambridge	Wellcome Sanger Institute for the COVID-19 Genomics UK (COG-UK) consortium	Luke W Meredith et al
EPI_ISL_441811,EPI_ISL_441788,EPI_ISL_441809,EPI_ISL_441166,EPI_ISL_441173,EPI_ISL_441796,EPI_ISL_441082,EPI_ISL_441211,EPI_ISL_441307,EPI_ISL_441076,EPI_ISL_441302,EPI_ISL_440560,EPI_ISL_441335,EPI_ISL_441285,EPI_ISL_441305,EPI_ISL_441310,EPI_ISL_440621,EPI_ISL_441226,EPI_ISL_440564,EPI_ISL_441241,EPI_ISL_441254,EPI_ISL_441284,EPI_ISL_441295,EPI_ISL_441227,EPI_ISL_441233,EPI_ISL_441296,EPI_ISL_4…	Department of Pathology, University of Cambridge	Wellcome Sanger Institute for the COVID-19 Genomics UK (COG-UK) consortium	Luke W Meredith et al
EPI_ISL_470501,EPI_ISL_470514,EPI_ISL_470466,EPI_ISL_470379,EPI_ISL_524508,EPI_ISL_524551,EPI_ISL_524546,EPI_ISL_524564,EPI_ISL_524498,EPI_ISL_524497,EPI_ISL_470482,EPI_ISL_470375,EPI_ISL_470526,EPI_ISL_470516,EPI_ISL_470426,EPI_ISL_470400,EPI_ISL_470436,EPI_ISL_470404,EPI_ISL_470443,EPI_ISL_470396,EPI_ISL_470366,EPI_ISL_470461,EPI_ISL_470434,EPI_ISL_470382,EPI_ISL_524506,EPI_ISL_470412,EPI_ISL_4…	Department of Pathology, University of Cambridge	Wellcome Sanger Institute for the COVID-19 Genomics UK (COG-UK) consortium	Luke W Meredith et al
EPI_ISL_883499,EPI_ISL_887506,EPI_ISL_887507,EPI_ISL_882697,EPI_ISL_882698,EPI_ISL_882699,EPI_ISL_882703,EPI_ISL_882704,EPI_ISL_882705,EPI_ISL_882706,EPI_ISL_882707,EPI_ISL_882708,EPI_ISL_882709,EPI_ISL_882710,EPI_ISL_882693,EPI_ISL_882711,EPI_ISL_882689,EPI_ISL_882712,EPI_ISL_882677,EPI_ISL_882678,EPI_ISL_882714,EPI_ISL_882716,EPI_ISL_882717,EPI_ISL_882719,EPI_ISL_882720,EPI_ISL_882722,EPI_ISL_8…	1.AO Universitaria 'S. Giovanni di Dio e Ruggi D'Aragona, Scuola Medica Salernitana' Hospital / 2.UOC di Virologia e Microbiologia, Università della Campania 'L. Vanvitelli' / 3.AO Universitaria 'Federico II' Napoli Hospital / 4.AORN 'San Giuseppe Moscati' Avellino Hospital / 5.AO 'San Pio - presidio G. Rummo' Benevento Hospital / 6.AO 'Sant'Anna e San Sebastiano' Caserta Hospital / 7.PO 'Maria S…	1. Genome Research Center for Health (CRGS) / 2. Laboratory of Molecular Medicine and Genomics(LMMGe) / 3. Center for Research in Pure and Applied Mathematics (CRMPA)	Giorgio Giurato et al
EPI_ISL_710099,EPI_ISL_710100,EPI_ISL_710101,EPI_ISL_710102,EPI_ISL_710103,EPI_ISL_710104,EPI_ISL_710105,EPI_ISL_710106,EPI_ISL_710107,EPI_ISL_710108,EPI_ISL_710109,EPI_ISL_710110,EPI_ISL_710111,EPI_ISL_710112,EPI_ISL_710113,EPI_ISL_710114,EPI_ISL_710115,EPI_ISL_710116,EPI_ISL_710117,EPI_ISL_710118,EPI_ISL_710430,EPI_ISL_710419,EPI_ISL_710423,EPI_ISL_710421,EPI_ISL_710431,EPI_ISL_710418,EPI_ISL_7…	Los Angeles County PHL	Los Angeles County PHL	P. Hemarajata et al. et al
EPI_ISL_450821,EPI_ISL_450822	Jarpens HC	The Public Health Agency of Sweden	Gunilla Johansson et al
EPI_ISL_641529	CHU de Nice - Hôpital Archet 11	CNR Virus des Infections Respiratoires - France SUD	Antonin Bal et al
EPI_ISL_456158,EPI_ISL_456159,EPI_ISL_456162,EPI_ISL_456167,EPI_ISL_456181,EPI_ISL_456216,EPI_ISL_456217,EPI_ISL_456218,EPI_ISL_456219,EPI_ISL_456220,EPI_ISL_456225,EPI_ISL_456226,EPI_ISL_456228,EPI_ISL_456230,EPI_ISL_456231,EPI_ISL_456233,EPI_ISL_456234,EPI_ISL_456235,EPI_ISL_456236,EPI_ISL_456237,EPI_ISL_456238,EPI_ISL_456240,EPI_ISL_456242,EPI_ISL_456243,EPI_ISL_456244,EPI_ISL_456245,EPI_ISL_4…	Southern Community Labs Dunedin	Institute of Environmental Science and Research (ESR)	Matt Storey et al
EPI_ISL_831902,EPI_ISL_831912,EPI_ISL_831904,EPI_ISL_831914,EPI_ISL_831915,EPI_ISL_831916,EPI_ISL_831917,EPI_ISL_831918,EPI_ISL_831919,EPI_ISL_602162,EPI_ISL_602163,EPI_ISL_602164,EPI_ISL_602165,EPI_ISL_602166,EPI_ISL_602167,EPI_ISL_602168,EPI_ISL_602169,EPI_ISL_602170,EPI_ISL_602171,EPI_ISL_602172,EPI_ISL_602173,EPI_ISL_602174,EPI_ISL_602175,EPI_ISL_602176,EPI_ISL_602177,EPI_ISL_602178,EPI_ISL_6…	New Mexico Department of Health Scientific Laboratory	New Mexico Department of Health Scientific Laboratory	Ellie Johnson et al
EPI_ISL_978547,EPI_ISL_978548	Centre de Virologie des Maladies infectueuses Tropicales	Functional Genomic Platform UATRS-biology, CNRST	Nadia Touil et al
EPI_ISL_634829,EPI_ISL_700360	Laboratoire de virologie, CHU de Grenoble - CS 10217 - 38043 Grenoble cedex 21	CNR Virus des Infections Respiratoires - France SUD	Antonin Bal et al
EPI_ISL_775597	RS Pertamina Sorong	National Institute of Health Research and Development	Puspa et al
EPI_ISL_833575,EPI_ISL_833573,EPI_ISL_833574	Veterinary Specialized Instute "Nis"	Veterinary Specialized Institute "Sabac", Serbia	Vidanovic et al
EPI_ISL_524762	GMERS Medical College and Hospital, Dharpur, Patan	Gujarat Biotechnology Research Centre	Afzal Ansari et al
EPI_ISL_913042,EPI_ISL_913043,EPI_ISL_913044,EPI_ISL_913045,EPI_ISL_913046,EPI_ISL_913047,EPI_ISL_913048,EPI_ISL_913049,EPI_ISL_913050,EPI_ISL_913051	Hospital Comarcal Sierrallana	Instituto de Salud Carlos III	Iglesias-Caballero et al
EPI_ISL_486853	CSIR-CDRI/SGPGI	CSIR-CDRI/SGPGI	Saumya Sarkar et al
EPI_ISL_418427	Hopital Privé de l'Est Lyonnais	CNR Virus des Infections Respiratoires - France SUD	Antonin Bal et al
EPI_ISL_940757	GZA Sint-Augustinus Hospital	UAntwerp, Laboratory of Medical Microbiology, Campus Drie Eiken S6.26, Universiteitsplein 1, 2610, Wilrijk, Belgium	Basil Britto Xavier et al
EPI_ISL_582510	Department of Respiratory and other Viral Infections of L.V.Gromashevsky Institute of Epidemiology & Infectious Diseases NAMS of Ukraine	Department of Respiratory and other Viral Infections of L.V.Gromashevsky Institute of Epidemiology & Infectious Diseases NAMS of Ukrainе, JSC "Farmak"	Alla Mironenko et al
EPI_ISL_414624,EPI_ISL_416494	Centre Hositalier Universitaire de Rouen Laboratoire de Virologie	National Reference Center for Viruses of Respiratory Infections, Institut Pasteur, Paris	Mélnie Albert et al
EPI_ISL_491576,EPI_ISL_491643,EPI_ISL_491697,EPI_ISL_491501,EPI_ISL_491569,EPI_ISL_491601,EPI_ISL_491589,EPI_ISL_491585,EPI_ISL_491629,EPI_ISL_491615,EPI_ISL_491522,EPI_ISL_491530,EPI_ISL_491582,EPI_ISL_491544,EPI_ISL_491694,EPI_ISL_491650,EPI_ISL_491662,EPI_ISL_491564,EPI_ISL_491666,EPI_ISL_491559,EPI_ISL_491653,EPI_ISL_491675,EPI_ISL_491634,EPI_ISL_491596,EPI_ISL_491584,EPI_ISL_491561,EPI_ISL_4…	Virology Department, Royal Infirmary of Edinburgh, NHS Lothian / School of Biological Sciences, University of Edinburgh	Wellcome Sanger Institute for the COVID-19 Genomics UK (COG-UK) consortium	McHugh M et al
EPI_ISL_959550,EPI_ISL_959547,EPI_ISL_959548,EPI_ISL_959549	AVIQ	GIGA Medical Genomics	Keith Durkin et al
EPI_ISL_529019	RSA/RP Villa San Giovanni - Gruppo Edos	Istitituto Zooprofilattico Sperimentale dell'Abruzzo e Molise "G.Caporale"	Lorusso A et al
EPI_ISL_534225,EPI_ISL_534226,EPI_ISL_534227,EPI_ISL_560980,EPI_ISL_534228,EPI_ISL_534229	Skanes universitetssjukhus Lund	The Public Health Agency of Sweden	Anna-Malin Linde et al
EPI_ISL_436113,EPI_ISL_436114,EPI_ISL_436115,EPI_ISL_436119,EPI_ISL_436120,EPI_ISL_436121,EPI_ISL_436123,EPI_ISL_436125,EPI_ISL_436126,EPI_ISL_436131,EPI_ISL_436132,EPI_ISL_456410,EPI_ISL_456427,EPI_ISL_456421,EPI_ISL_456411,EPI_ISL_456414,EPI_ISL_456415,EPI_ISL_456416,EPI_ISL_456417,EPI_ISL_456419,EPI_ISL_456425,EPI_ISL_456430,EPI_ISL_456432,EPI_ISL_456433,EPI_ISL_456422,EPI_ISL_456423,EPI_ISL_4…	Victorian Infectious Diseases Reference Laboratory (VIDRL)	Microbiological Diagnostic Unit Public Health Laboratory and Victorian Infectious Diseases Reference Laboratory, Doherty Institute	Caly L. et al
EPI_ISL_763069,EPI_ISL_763098,EPI_ISL_763094,EPI_ISL_763323,EPI_ISL_763322,EPI_ISL_763096,EPI_ISL_763095,EPI_ISL_763073,EPI_ISL_763320,EPI_ISL_763330,EPI_ISL_763097,EPI_ISL_763328,EPI_ISL_763327,EPI_ISL_763326,EPI_ISL_763325,EPI_ISL_763318,EPI_ISL_763072,EPI_ISL_763324,EPI_ISL_763138,EPI_ISL_763329,EPI_ISL_763071	Istituto Zooprofilattico Sperimentale dell' Umbria e delle Marche -Togo Rosati	Istituto Superiore di Sanità	Massimo Biagetti et al
EPI_ISL_535719,EPI_ISL_535720,EPI_ISL_535756,EPI_ISL_535757,EPI_ISL_535769	Hôpital général Juif	Laboratoire de santé publique du Québec	Sandrine Moreira et al
EPI_ISL_402119,EPI_ISL_402120,EPI_ISL_402121	National Institute for Viral Disease Control and Prevention, China CDC	National Institute for Viral Disease Control and Prevention, China CDC	Wenjie Tan et al
EPI_ISL_534248,EPI_ISL_534252,EPI_ISL_534253,EPI_ISL_534254,EPI_ISL_534255,EPI_ISL_534257,EPI_ISL_534258	Laboratoriemedicin Vasternorrland	The Public Health Agency of Sweden	Anna-Malin Linde et al
EPI_ISL_515894,EPI_ISL_515895,EPI_ISL_515896,EPI_ISL_515897,EPI_ISL_515898,EPI_ISL_515899,EPI_ISL_515900,EPI_ISL_515901,EPI_ISL_515902,EPI_ISL_515903,EPI_ISL_515905,EPI_ISL_515906,EPI_ISL_515907,EPI_ISL_515908,EPI_ISL_515909,EPI_ISL_515910,EPI_ISL_515911,EPI_ISL_515912,EPI_ISL_515913,EPI_ISL_515914,EPI_ISL_515915,EPI_ISL_515916,EPI_ISL_515917,EPI_ISL_515918,EPI_ISL_515919,EPI_ISL_515920,EPI_ISL_5…	California Department of Public Health	California Department of Public Health	CDPH IDLB COVIDNet et al
EPI_ISL_414692,EPI_ISL_414663,EPI_ISL_414686,EPI_ISL_414688,EPI_ISL_414689,EPI_ISL_414690,EPI_ISL_414691	State Key Laboratory of Respiratory Disease, National Clinical Research Center for Respiratory Disease, Guangzhou Institute of Respiratory Health, the First Affiliated Hospital of Guangzhou Medical University	The First Affiliated Hospital of Guangzhou Medical University & BGI-Shenzhen	Zhao et al et al
EPI_ISL_984626,EPI_ISL_984627,EPI_ISL_984625,EPI_ISL_984623,EPI_ISL_984624	Plateforme BIS Namur	GIGA Medical Genomics	Keith Durkin et al
EPI_ISL_455604,EPI_ISL_434700,EPI_ISL_515292	Ramkhamhaeng Hospital	National Institute of Health. Department of medical Sciences, Ministry of Public Health, Thailand	Pilailuk et al
EPI_ISL_416538	Wellington Hospital	Institute of Environmental Science and Research (ESR)	Wellington SCL et al
EPI_ISL_583465,EPI_ISL_583466,EPI_ISL_583468,EPI_ISL_583469,EPI_ISL_583470,EPI_ISL_583472,EPI_ISL_583474,EPI_ISL_583475,EPI_ISL_583476,EPI_ISL_583478,EPI_ISL_583427,EPI_ISL_583479,EPI_ISL_583480,EPI_ISL_583428,EPI_ISL_583430,EPI_ISL_583431,EPI_ISL_583432,EPI_ISL_583433,EPI_ISL_583437,EPI_ISL_583438,EPI_ISL_583439,EPI_ISL_583440,EPI_ISL_583443,EPI_ISL_583444,EPI_ISL_583445,EPI_ISL_583446,EPI_ISL_5…	Memorial Sloan Kettering Cancer Center	van Bakel Laboratory, Genetics and Genomics Sciences, Icahn School of Medicine at Mount Sinai	Teresa Aydillo et al
EPI_ISL_447594	Caloundra Hospital	Public Health Virology Laboratory	Bixing Huang et al
EPI_ISL_420531,EPI_ISL_420532,EPI_ISL_420533,EPI_ISL_420536,EPI_ISL_420534,EPI_ISL_420537,EPI_ISL_420538,EPI_ISL_420539	Department of Microbiology, PathWest QEII Medical Centre	Department of Microbiology, PathWest QEII Medical Centre	Chisha Sikazwe et al
EPI_ISL_947281	RSU Medika Dramaga	Eijkman Institute for Molecular Biology, Ministry of Research and Technology/National Agency for Research and Innovation	Hidayat Trimarsanto et al
EPI_ISL_419560,EPI_ISL_419559	FL Bureau of Public Health Laboratories-Tampa	Pathogen Discovery, Respiratory Viruses Branch, Division of Viral Diseases, Centers for Disease Control and Prevention	Anna Uehara et al
EPI_ISL_633014,EPI_ISL_633016,EPI_ISL_633017,EPI_ISL_633023,EPI_ISL_633025,EPI_ISL_633031,EPI_ISL_633033,EPI_ISL_633039,EPI_ISL_633040,EPI_ISL_633046,EPI_ISL_633047,EPI_ISL_633052,EPI_ISL_633066,EPI_ISL_633069,EPI_ISL_633076,EPI_ISL_633077,EPI_ISL_633078,EPI_ISL_671684,EPI_ISL_671693,EPI_ISL_671702,EPI_ISL_671713,EPI_ISL_671722,EPI_ISL_671763,EPI_ISL_683941,EPI_ISL_683865,EPI_ISL_683957,EPI_ISL_6…	DOHMH Chelsea	New York City Public Health Laboratory	Jade Wang et al
EPI_ISL_582834,EPI_ISL_582801,EPI_ISL_648142,EPI_ISL_615101,EPI_ISL_615102,EPI_ISL_582809,EPI_ISL_623095,EPI_ISL_648144,EPI_ISL_615103,EPI_ISL_648163,EPI_ISL_648141,EPI_ISL_648140	Gavle klinisk mikrobiologi	The Public Health Agency of Sweden	Anna-Malin Linde et al
EPI_ISL_947320	RS Sari Asih Ciledug	Eijkman Institute for Molecular Biology, Ministry of Research and Technology/National Agency for Research and Innovation	Sukma Oktavianthi et al
EPI_ISL_454571	National Center of Expertise	National Center for Expertise, National Center for Biotechnology, Kazakhstan	Abdaliyev Askar et al
EPI_ISL_434536	Hospital San Vicente de Paul	Inciensa, Instituto Costarricense de Investigación y Enseñanza en Nutrición y Salud	Francisco Duarte et al
EPI_ISL_447330,EPI_ISL_447329,EPI_ISL_447328,EPI_ISL_447327,EPI_ISL_447326,EPI_ISL_447325,EPI_ISL_447324,EPI_ISL_447323,EPI_ISL_447322,EPI_ISL_447321,EPI_ISL_447320,EPI_ISL_447319,EPI_ISL_447318,EPI_ISL_447317,EPI_ISL_447316,EPI_ISL_447315,EPI_ISL_447314,EPI_ISL_447313,EPI_ISL_447312,EPI_ISL_447311	Clinical Virology Laboratory, Soroka Medical Center and the Faculty of Health Sciences, Ben-Gurion University of the Negev	Stern Lab	Stern Lab et al
EPI_ISL_759958	Universitas Airlangga Hospital	Institute of Tropical Disease, Universitas Airlangga	Maria I Lusida et al
EPI_ISL_955300,EPI_ISL_955265	Sunrise Medical Laboratory	Pathogen Discovery, Respiratory Viruses Branch, Division of Viral Diseases, Centers for Disease Control and Prevention	Ying Tao et al
EPI_ISL_852925,EPI_ISL_852867,EPI_ISL_852939,EPI_ISL_852896,EPI_ISL_852893,EPI_ISL_852868,EPI_ISL_852902,EPI_ISL_852927,EPI_ISL_852878,EPI_ISL_852924,EPI_ISL_852874,EPI_ISL_852907,EPI_ISL_852866,EPI_ISL_852872,EPI_ISL_852873,EPI_ISL_852928,EPI_ISL_852920,EPI_ISL_852936,EPI_ISL_852946,EPI_ISL_852905,EPI_ISL_852938,EPI_ISL_852919,EPI_ISL_852944,EPI_ISL_852903,EPI_ISL_852914,EPI_ISL_852869,EPI_ISL_8…	Toronto Invasive Bacterial Diseases Network	Ontario Institute for Cancer Research	Allison McGeer et al
EPI_ISL_529908,EPI_ISL_529909,EPI_ISL_529910,EPI_ISL_529911,EPI_ISL_529912,EPI_ISL_529913,EPI_ISL_529914,EPI_ISL_529915,EPI_ISL_529916,EPI_ISL_529917,EPI_ISL_529918,EPI_ISL_529919,EPI_ISL_529920,EPI_ISL_529921,EPI_ISL_529922,EPI_ISL_529923,EPI_ISL_529924,EPI_ISL_529925,EPI_ISL_529926,EPI_ISL_529927,EPI_ISL_529928,EPI_ISL_529929,EPI_ISL_529930,EPI_ISL_529931,EPI_ISL_529932,EPI_ISL_529933,EPI_ISL_5…	Virginia Division of Consolidated Laboratory Services	Virginia Division of Consolidated Laboratory Services	Virginia DCLS et al
EPI_ISL_512654	Hospital Dr. Rafael A. Calderon Guardia [San Jose/San Jose]	Inciensa, Instituto Costarricense de Investigación y Enseñanza en Nutrición y Salud	Francisco Duarte et al
EPI_ISL_475538,EPI_ISL_475528,EPI_ISL_475533,EPI_ISL_475534,EPI_ISL_475535	Omtanken Grimmered	The Public Health Agency of Sweden	Oskar Karlsson Lindsjo et al
EPI_ISL_524478,EPI_ISL_811127	Cantonal Hospital Winterthur	Institute of Medical Virology, University of Zurich	Stefan Schmutz et al
EPI_ISL_451156	Government Medical College, Vadodara	Gujarat Biotechnology Research Centre	Amit Kanani et al
EPI_ISL_443261,EPI_ISL_443262,EPI_ISL_443263,EPI_ISL_443264	CHU de Dijon - Laboratoire de Virologie	National Reference Center for Viruses of Respiratory Infections, Institut Pasteur, Paris	Mélanie Albert et al
EPI_ISL_831969,EPI_ISL_766614,EPI_ISL_789046	unknown	The Public Health Agency of Sweden	Department of Microbiology et al
EPI_ISL_914036,EPI_ISL_914037,EPI_ISL_914038	CT-Dr. Katherine A. Kelley State Public Health Lab	Pathogen Discovery, Respiratory Viruses Branch, Division of Viral Diseases, Centers for Disease Control and Prevention	Ying Tao et al
EPI_ISL_455586,EPI_ISL_447906,EPI_ISL_447907,EPI_ISL_447908	Siriraj hospital	National Institute of Health. Department of medical Sciences, Ministry of Public Health, Thailand	Pilailuk et al
EPI_ISL_751763,EPI_ISL_751575,EPI_ISL_751701,EPI_ISL_751704,EPI_ISL_751705,EPI_ISL_751766,EPI_ISL_751728,EPI_ISL_751630,EPI_ISL_903818,EPI_ISL_903780,EPI_ISL_903799,EPI_ISL_903861,EPI_ISL_903581,EPI_ISL_903606,EPI_ISL_903781,EPI_ISL_903648,EPI_ISL_903936,EPI_ISL_903798	CO Dept. of Public Health and Environment, Lab Services Division	Genomics and Discovery, Respiratory Viruses Branch, Division of Viral Diseases, Centers for Disease Control and Prevention	Krista Queen et al
EPI_ISL_491231,EPI_ISL_491232,EPI_ISL_491233,EPI_ISL_491235,EPI_ISL_491236,EPI_ISL_491237,EPI_ISL_491238,EPI_ISL_491239,EPI_ISL_491240,EPI_ISL_491241,EPI_ISL_491242,EPI_ISL_491243,EPI_ISL_491244,EPI_ISL_491245,EPI_ISL_491246,EPI_ISL_491247,EPI_ISL_491248,EPI_ISL_491249,EPI_ISL_491250,EPI_ISL_491251,EPI_ISL_491252,EPI_ISL_491253,EPI_ISL_491254,EPI_ISL_491255,EPI_ISL_491256,EPI_ISL_491257,EPI_ISL_4…	Instituto Gulbenkian de Ciência	Instituto Gulbenkian de Ciência	Joao Sobral et al
EPI_ISL_538503	RSUD Bali Mandara Denpasar Bali	National Institute of Health Research and Development	Pawestri et al
EPI_ISL_886157,EPI_ISL_887106,EPI_ISL_887107,EPI_ISL_887108,EPI_ISL_887109,EPI_ISL_887110,EPI_ISL_887111,EPI_ISL_887112,EPI_ISL_887113,EPI_ISL_887114	Institute of Medical Microbiology and Virology, University Hospital Carl Gustav Carus, TU Dresden	DRESDEN-concept Genome Center, CMCB, TU Dresden	Beil J. et al
EPI_ISL_447904	National Institute of Biotechnology	National Institute of Biotechnology	Md. Moniruzzaman et al
EPI_ISL_677680,EPI_ISL_677681,EPI_ISL_677689,EPI_ISL_677682,EPI_ISL_677678,EPI_ISL_677683,EPI_ISL_677684,EPI_ISL_677679,EPI_ISL_677685,EPI_ISL_677692,EPI_ISL_677687,EPI_ISL_677686,EPI_ISL_677688,EPI_ISL_677696,EPI_ISL_677699,EPI_ISL_677695	Vanda Pharmaceuticals Clinical Site	Vanda Pharmaceuticals	Vanda Pharmaceuticals et al
EPI_ISL_436718,EPI_ISL_420566,EPI_ISL_420567	Ospedale Regionale San Salvatore	Istituto Zooprofilattico Sperimentale dell'Abruzzo e Molise "G.Caporale"	Lorusso A et al
EPI_ISL_407313	Hangzhou Center for Disease Control and Prevention	Hangzhou Center for Disease Control and Prevention	Jun Li et al
EPI_ISL_535359,EPI_ISL_535360	RI State Health Laboratories	Pathogen Discovery, Respiratory Viruses Branch, Division of Viral Diseases, Centers for Disease Control and Prevention	Jing Zhang et al
EPI_ISL_497764	CSIR-CDRi/SGPGI, Lucknow	CSIR-CDRI/SGPGI, Lucknow	Saumya Sarkar et al
EPI_ISL_700412,EPI_ISL_700454,EPI_ISL_700459,EPI_ISL_640101,EPI_ISL_640103,EPI_ISL_700522,EPI_ISL_640106,EPI_ISL_700508,EPI_ISL_700499,EPI_ISL_700473,EPI_ISL_700549	Heideveld CDC wc HVP	NHLS/UCT	Arash Iranzadeh et al
EPI_ISL_861867,EPI_ISL_861868,EPI_ISL_861869,EPI_ISL_861870,EPI_ISL_861871,EPI_ISL_977500,EPI_ISL_884249,EPI_ISL_861872,EPI_ISL_861873,EPI_ISL_861874,EPI_ISL_861875,EPI_ISL_861876,EPI_ISL_861877,EPI_ISL_861878,EPI_ISL_861879,EPI_ISL_861880,EPI_ISL_861881,EPI_ISL_861882,EPI_ISL_861883,EPI_ISL_861884,EPI_ISL_861885,EPI_ISL_861886,EPI_ISL_861887,EPI_ISL_861888,EPI_ISL_861890,EPI_ISL_861891,EPI_ISL_8…	LATE - Laboratório de Técnicas Especiais - Hospital Israelita Albert Einstein	LATE - Laboratório de Técnicas Especiais - Hospital Israelita Albert Einstein	Deyvid Amgarten et al
EPI_ISL_529151,EPI_ISL_529152,EPI_ISL_529153	Department of Immunology, The Scripps Research Institute	Andersen lab at Scripps Research	Quigley et al
EPI_ISL_523983,EPI_ISL_523993	UPA Campo Limpo	Instituto Adolfo Lutz, Interdiciplinary Procedures Center, Strategic Laboratory	Claudio Tavares Sacchi et al
EPI_ISL_475544,EPI_ISL_475545,EPI_ISL_475546,EPI_ISL_475547,EPI_ISL_475551,EPI_ISL_475552,EPI_ISL_469079,EPI_ISL_469075,EPI_ISL_475558,EPI_ISL_475559,EPI_ISL_469077,EPI_ISL_475560,EPI_ISL_475561,EPI_ISL_469078,EPI_ISL_475136,EPI_ISL_475086,EPI_ISL_475087,EPI_ISL_475088,EPI_ISL_475089,EPI_ISL_475090,EPI_ISL_475091,EPI_ISL_475095,EPI_ISL_475141,EPI_ISL_475142,EPI_ISL_475149,EPI_ISL_475150,EPI_ISL_5…	Karolinska Universitetslaboratoriet	The Public Health Agency of Sweden	Oskar Karlsson Lindsjo et al
EPI_ISL_977509	Hospital Valle del Nalón	Laboratorio de Virología HUCA	Sandoval M et al
EPI_ISL_765568	National Institute for Infectious Diseases, INMI, "L. Spallanzani" IRCCS	National Institute for Infectious Diseases, INMI, "L. Spallanzani" IRCCS	O Butera et al
EPI_ISL_888677,EPI_ISL_861712,EPI_ISL_861713,EPI_ISL_861710,EPI_ISL_861711	Laboratory for Respiratory Viruses, Cantacuzino National Military-Medical Institute for Research and Development	Cantacuzino Institute Virology	Mihaela Lazar et al
EPI_ISL_455793,EPI_ISL_455790,EPI_ISL_455791,EPI_ISL_455792	Institute for Medical Research, Infectious Disease Research Centre, National Institutes of Health, Ministry of Health Malaysia	Malaysia Genome Institute	Mohd Noor Mat Isa et al
EPI_ISL_909738	General Hospital - Bitola	Research Center for Genetic Engineering and Biotechnology "Georgi D. Efremov” , Macedonian Academ	RCGEB - MASA et al
EPI_ISL_941270	HIA PERCY - lab biologie	National Reference Center for Viruses of Respiratory Infections, Institut Pasteur, Paris	Marion Barbet et al
EPI_ISL_909702	CHU de Nantes - Hôtel Dieu. Laboratoire de Virologie	National Reference Center for Viruses of Respiratory Infections, Institut Pasteur, Paris	Marion Barbet et al
EPI_ISL_418229	Hopital franco britannique - Laboratoire	National Reference Center for Viruses of Respiratory Infections, Institut Pasteur, Paris	Mélanie Albert et al
EPI_ISL_855345,EPI_ISL_855348,EPI_ISL_855349,EPI_ISL_855350,EPI_ISL_855351,EPI_ISL_855352,EPI_ISL_855346,EPI_ISL_855347	Department of Epidemiology, Infectious Disease Control and Prevention, Hiroshima University, Japan	Department of Epidemiology, Infectious Disease Control and Prevention, Hiroshima University, Japan	Junko Tanaka et al
EPI_ISL_660121,EPI_ISL_660122,EPI_ISL_660123,EPI_ISL_660124,EPI_ISL_660125,EPI_ISL_660126,EPI_ISL_660127,EPI_ISL_660128	Ampath	National Health Laboratory Service (NHLS), Tygerberg	Susan Engelbrecht et al
EPI_ISL_913990,EPI_ISL_914013,EPI_ISL_914014,EPI_ISL_914015,EPI_ISL_914016,EPI_ISL_914017,EPI_ISL_914018,EPI_ISL_914019,EPI_ISL_914020,EPI_ISL_914021,EPI_ISL_914022,EPI_ISL_914023,EPI_ISL_914024,EPI_ISL_914025,EPI_ISL_914026,EPI_ISL_914027,EPI_ISL_914028,EPI_ISL_914029,EPI_ISL_404253	IL Department of Public Health Chicago Laboratory	Pathogen Discovery, Respiratory Viruses Branch, Division of Viral Diseases, Centers for Disease Control and Prevention	Ying Tao et al
EPI_ISL_416742,EPI_ISL_416743	NRL for Influenza, Centrum Epidemiology and Microbiology of National Institute of Public Health, Czech Republic	Charite Universitaetsmedizin Berlin, Institute of Virology	Victor M Corman et al
EPI_ISL_452236	VC Sorgenfrimottagningen	The Public Health Agency of Sweden	Lisa Esbjornsson Klemendz et al
EPI_ISL_434687,EPI_ISL_434688,EPI_ISL_434691,EPI_ISL_438223,EPI_ISL_457753,EPI_ISL_434639,EPI_ISL_457796,EPI_ISL_457797,EPI_ISL_457801,EPI_ISL_457805,EPI_ISL_438229,EPI_ISL_438230,EPI_ISL_438231,EPI_ISL_438232,EPI_ISL_438237,EPI_ISL_438242,EPI_ISL_438243,EPI_ISL_457757,EPI_ISL_457760,EPI_ISL_438244,EPI_ISL_438245,EPI_ISL_457809,EPI_ISL_457810,EPI_ISL_457814,EPI_ISL_457822,EPI_ISL_457823,EPI_ISL_4…	Johns Hopkins Hospital Department of Pathology	Johns Hopkins Hospital Department of Pathology	Peter M. Thielen et al
EPI_ISL_734447,EPI_ISL_734448,EPI_ISL_734449,EPI_ISL_734450,EPI_ISL_734451,EPI_ISL_734452,EPI_ISL_734453,EPI_ISL_734454,EPI_ISL_734455,EPI_ISL_734456,EPI_ISL_734457,EPI_ISL_734458,EPI_ISL_734459,EPI_ISL_734460,EPI_ISL_734461,EPI_ISL_734462,EPI_ISL_734463,EPI_ISL_734464,EPI_ISL_734465,EPI_ISL_734466,EPI_ISL_734467,EPI_ISL_734468,EPI_ISL_734469,EPI_ISL_734470,EPI_ISL_734471,EPI_ISL_734472,EPI_ISL_7…	Masonic Medical Research Institute	Wadsworth Center, New York State Department.of Health	Kirsten St. George et al
EPI_ISL_605929,EPI_ISL_605930	Department of Infectious Disease Prevention and Control, Henan Provincial Center for Disease Control and Prevention	Department of Infectious Disease Prevention and Control, Henan Provincial Center for Disease Control and Prevention	Li et al
EPI_ISL_515520,EPI_ISL_523955,EPI_ISL_468308,EPI_ISL_523974,EPI_ISL_523976,EPI_ISL_527863,EPI_ISL_468315,EPI_ISL_515551,EPI_ISL_515526,EPI_ISL_515552,EPI_ISL_515546	Hospital Municipal do Tatuape Carmino Caricchio	Instituto Adolfo Lutz, Interdiciplinary Procedures Center, Strategic Laboratory	Claudio Tavares Sacchi et al
EPI_ISL_452131	IN State Department of Health Laboratory Services	Pathogen Discovery, Respiratory Viruses Branch, Division of Viral Diseases, Centers for Disease Control and Prevention	Jing Zhang et al
EPI_ISL_512655,EPI_ISL_512672,EPI_ISL_512673,EPI_ISL_512674,EPI_ISL_512675,EPI_ISL_527750	Hospital De Niños Dr. Carlos Saenz Herrera [San Jose/San Jose]	Inciensa, Instituto Costarricense de Investigación y Enseñanza en Nutrición y Salud	Francisco Duarte et al
EPI_ISL_751663,EPI_ISL_751643,EPI_ISL_751781,EPI_ISL_751743,EPI_ISL_751688,EPI_ISL_751591,EPI_ISL_751555,EPI_ISL_751691,EPI_ISL_751619,EPI_ISL_903895,EPI_ISL_903749,EPI_ISL_903803,EPI_ISL_903763,EPI_ISL_903930,EPI_ISL_903863,EPI_ISL_903599,EPI_ISL_903806,EPI_ISL_903764,EPI_ISL_903809	WY Public Health Laboratory	Genomics and Discovery, Respiratory Viruses Branch, Division of Viral Diseases, Centers for Disease Control and Prevention	Krista Queen et al
EPI_ISL_965250,EPI_ISL_965251,EPI_ISL_965266,EPI_ISL_965252,EPI_ISL_965247,EPI_ISL_965248,EPI_ISL_965249,EPI_ISL_965261,EPI_ISL_965240,EPI_ISL_965253,EPI_ISL_965272,EPI_ISL_965270,EPI_ISL_935156,EPI_ISL_935169,EPI_ISL_935972,EPI_ISL_935971,EPI_ISL_935168,EPI_ISL_935159,EPI_ISL_935162,EPI_ISL_935161,EPI_ISL_935166,EPI_ISL_935167,EPI_ISL_935165,EPI_ISL_935158	SIESP CHIETI	Istituto Zooprofilattico Sperimentale dell’Abruzzo e Molise “G. Caporale”	Lorusso A et al
EPI_ISL_536353,EPI_ISL_465697	Centre de santé Inuulitsivik	Laboratoire de santé publique du Québec	Sandrine Moreira et al
EPI_ISL_693238,EPI_ISL_693239,EPI_ISL_693247	Secao Centro de Diagnostico Secedi	Instituto Adolfo Lutz, Interdiciplinary Procedures Center, Strategic Laboratory	Claudio Tavares Sacchi et al
EPI_ISL_977984	`	Chiu Laboratory, University of California, San Francisco	Charles Chiu et al
EPI_ISL_718163,EPI_ISL_718152,EPI_ISL_718150,EPI_ISL_718140,EPI_ISL_718142,EPI_ISL_718164,EPI_ISL_718162,EPI_ISL_718157,EPI_ISL_718138,EPI_ISL_718144,EPI_ISL_718148,EPI_ISL_718137,EPI_ISL_718132,EPI_ISL_718136,EPI_ISL_718147,EPI_ISL_718149,EPI_ISL_718146,EPI_ISL_718161,EPI_ISL_718143,EPI_ISL_718210,EPI_ISL_718214,EPI_ISL_718215,EPI_ISL_718211,EPI_ISL_718213,EPI_ISL_718212,EPI_ISL_718219,EPI_ISL_7…	Ministry of Health Hospitals	Institute of Health and Community Medicine	David Perera et al
EPI_ISL_955324,EPI_ISL_955323,EPI_ISL_955327,EPI_ISL_955274,EPI_ISL_955325,EPI_ISL_955285,EPI_ISL_955271,EPI_ISL_955326,EPI_ISL_955322,EPI_ISL_955273	American Esoteric Laboratory	Pathogen Discovery, Respiratory Viruses Branch, Division of Viral Diseases, Centers for Disease Control and Prevention	Ying Tao et al
EPI_ISL_516806	Rumah Sakit PKU Gamping	Genetics Working Group (Pokja Genetik) Faculty of Medicine, Public Health and Nursing Universitas Gadjah Mada (FK-KMK UGM); Disease Investigation Center Wates Ministry of Agriculture Indonesia; Department of Microbiology FK-KMK UGM; Laboratorium Diagnostik Yayasan Tahija World Mosquito Program (WMP) Yogyakarta Center for Tropical Medicine FK-KMK UGM; Integrated Research center FK-KMK UGM; Departm…	Gunadi et al
EPI_ISL_495459,EPI_ISL_429852,EPI_ISL_429853,EPI_ISL_429854,EPI_ISL_429855	Centers for Disease Control and Prevention of Lishui	Department of Inspection，Centers for Disease Control and Prevention of Lishui	Wang Xiaoguang et al
EPI_ISL_451958	Jamil-ur-Rahman Center for Genome Research, Dr. Panjwani Center for Molecular Medicine and Drug Research, International Center for Chemical and Biological Sciences, University of Karachi	Jamil-ur-Rahman Center for Genome Research, Dr. Panjwani Center for Molecular Medicine and Drug Research, International Center for Chemical and Biological Sciences, University of Karachi	Shakeel et al
EPI_ISL_759964	Mitra Keluarga Hospital Waru	Institute of Tropical Disease, Universitas Airlangga	Jezzy R Dewantari et al
EPI_ISL_515543	Serviço de Vigilância Sanitária e Epidemiológica	Instituto Adolfo Lutz, Interdiciplinary Procedures Center, Strategic Laboratory	Claudio Tavares Sacchi et al
EPI_ISL_903924,EPI_ISL_903797,EPI_ISL_903882,EPI_ISL_903912,EPI_ISL_903939,EPI_ISL_903805,EPI_ISL_903582,EPI_ISL_903802,EPI_ISL_903757	TN Division of Laboratory Services	Genomics and Discovery, Respiratory Viruses Branch, Division of Viral Diseases, Centers for Disease Control and Prevention	Krista Queen et al
EPI_ISL_903978,EPI_ISL_903949,EPI_ISL_903955,EPI_ISL_903970,EPI_ISL_903954,EPI_ISL_903631,EPI_ISL_903578,EPI_ISL_903960,EPI_ISL_903965,EPI_ISL_903952,EPI_ISL_903633,EPI_ISL_903975,EPI_ISL_903968,EPI_ISL_903972,EPI_ISL_903962,EPI_ISL_903573,EPI_ISL_903956,EPI_ISL_903948,EPI_ISL_903974,EPI_ISL_903961,EPI_ISL_903971,EPI_ISL_903653,EPI_ISL_903966	WA State Department of Health	Genomics and Discovery, Respiratory Viruses Branch, Division of Viral Diseases, Centers for Disease Control and Prevention	Krista Queen et al
EPI_ISL_732556,EPI_ISL_732557,EPI_ISL_732558,EPI_ISL_732559,EPI_ISL_732560,EPI_ISL_732533,EPI_ISL_732538,EPI_ISL_732539,EPI_ISL_732540,EPI_ISL_732537,EPI_ISL_732535,EPI_ISL_732536,EPI_ISL_732534,EPI_ISL_732531,EPI_ISL_732532,EPI_ISL_732658	Bundeswehr Institute of Microbiology	Bundeswehr Institute of Microbiology	Elham Khatamzas et al
EPI_ISL_914806	AREA DE SALUD CORONADO	Inciensa, Instituto Costarricense de Investigación y Enseñanza en Nutrición y Salud	Francisco Duarte et al
EPI_ISL_483866	Department of Microbiology, Government Medical College, Surat	Gujarat Biotechnology Research Centre	Maharshi Pandya et al
EPI_ISL_410531,EPI_ISL_410532	Dept. of Pathology, National Institute of Infectious Diseases	Pathogen Genomics Center, National Institute of Infectious Diseases	Tsuyoshi Sekizuka et al
EPI_ISL_494970,EPI_ISL_495012,EPI_ISL_495013	Dr. Tony Mazzulli Microbiologist-in-Chief	Dr. Jeff Wrana, Senior Investigator	Jeff Wrana et al
EPI_ISL_632060	NYC HH Queens Hospital Center	New York City Public Health Laboratory	Jade Wang et al
EPI_ISL_693205	Hospital de Campanha Covid-19 Assis	Instituto Adolfo Lutz, Interdiciplinary Procedures Center, Strategic Laboratory	Claudio Tavares Sacchi et al
EPI_ISL_860264,EPI_ISL_860265,EPI_ISL_860266,EPI_ISL_860267,EPI_ISL_860268,EPI_ISL_906805,EPI_ISL_964977,EPI_ISL_964978,EPI_ISL_549087,EPI_ISL_549051,EPI_ISL_549173,EPI_ISL_549174,EPI_ISL_590920,EPI_ISL_590919,EPI_ISL_590885,EPI_ISL_590886,EPI_ISL_590887,EPI_ISL_590888,EPI_ISL_635105,EPI_ISL_635106,EPI_ISL_590982,EPI_ISL_590983,EPI_ISL_635112,EPI_ISL_668390,EPI_ISL_635139,EPI_ISL_775472,EPI_ISL_7…	Vestfold Hospital, Toensberg Department of Microbiology	Norwegian Institute of Public Health, Department of Virology	Kathrine Stene-Johansen et al
EPI_ISL_469926,EPI_ISL_469918,EPI_ISL_469923,EPI_ISL_469928,EPI_ISL_469929,EPI_ISL_469927,EPI_ISL_469924,EPI_ISL_469920,EPI_ISL_469922,EPI_ISL_469925,EPI_ISL_537283,EPI_ISL_537275,EPI_ISL_537281,EPI_ISL_537282,EPI_ISL_537284,EPI_ISL_537277,EPI_ISL_537280,EPI_ISL_537242,EPI_ISL_537223,EPI_ISL_537212,EPI_ISL_537229,EPI_ISL_537231,EPI_ISL_537273,EPI_ISL_537208,EPI_ISL_537224,EPI_ISL_537256,EPI_ISL_5…	Virology Department, Sheffield Teaching Hospitals NHS Foundation Trust / Department of Infection, Immunity and Cardiovascular Disease, The Medical School, University of Sheffield	Wellcome Sanger Institute for the COVID-19 Genomics UK (COG-UK) consortium	Thushan de Silva et al
EPI_ISL_437455,EPI_ISL_437456,EPI_ISL_437458,EPI_ISL_437457,EPI_ISL_421279,EPI_ISL_421281,EPI_ISL_902962,EPI_ISL_902954,EPI_ISL_902963,EPI_ISL_902958,EPI_ISL_902964,EPI_ISL_902955,EPI_ISL_902950,EPI_ISL_902956,EPI_ISL_902965,EPI_ISL_902951,EPI_ISL_902959,EPI_ISL_902966,EPI_ISL_902952,EPI_ISL_902967,EPI_ISL_902960,EPI_ISL_902957,EPI_ISL_902968,EPI_ISL_902961,EPI_ISL_902953,EPI_ISL_902970,EPI_ISL_9…	Clinical Diagnostics Laboratory, Diagnostic & Experimental Pathology, Lilly Research Laboratories	Clinical Diagnostics Laboratory, Diagnostic & Experimental Pathology, Lilly Research Laboratories	Tim Holzer et al
EPI_ISL_569614	IHS Fort Yates Hospital	South Dakota Public Health Laboratory	Matt Plumb et al
EPI_ISL_861490	Cerballiance Côte d'Azur	CERBA LAB	De La Chapelle A et al
EPI_ISL_547969,EPI_ISL_547976,EPI_ISL_547978,EPI_ISL_547979,EPI_ISL_548106,EPI_ISL_547990,EPI_ISL_547992,EPI_ISL_547996,EPI_ISL_547997,EPI_ISL_547998,EPI_ISL_547999,EPI_ISL_548000,EPI_ISL_579059,EPI_ISL_548017,EPI_ISL_548021,EPI_ISL_548022,EPI_ISL_548023,EPI_ISL_548024,EPI_ISL_548025,EPI_ISL_548026,EPI_ISL_548108,EPI_ISL_548027,EPI_ISL_548040,EPI_ISL_548041,EPI_ISL_548049,EPI_ISL_548050,EPI_ISL_5…	LabPLUS	Institute of Environmental Science and Research (ESR)	Xiaoyun Ren et al
EPI_ISL_825146,EPI_ISL_825151,EPI_ISL_845881	Kidwai Memorial Institute of Oncology	Department of Neurovirology, National Institute of Mental Health and Neurosciences (NIMHANS)	Chitra Pattabiraman et al
EPI_ISL_850507,EPI_ISL_850509	Gandhi Medical College and Hospital	VRDL-Gandhi Medical College	Nagamani Kammili et al
EPI_ISL_960805,EPI_ISL_960819,EPI_ISL_960820,EPI_ISL_960821,EPI_ISL_960758,EPI_ISL_960759,EPI_ISL_960785,EPI_ISL_960671,EPI_ISL_960786,EPI_ISL_960760,EPI_ISL_960806,EPI_ISL_960668,EPI_ISL_960822,EPI_ISL_960716,EPI_ISL_960717,EPI_ISL_960761,EPI_ISL_960787,EPI_ISL_960708,EPI_ISL_960718,EPI_ISL_960719,EPI_ISL_960823,EPI_ISL_960748,EPI_ISL_960749,EPI_ISL_960693,EPI_ISL_960692,EPI_ISL_960723,EPI_ISL_9…	Germano de sousa	Instituto Gulbenkian de Ciencia	Susana Ladeiro et al
EPI_ISL_429802,EPI_ISL_455566,EPI_ISL_429805,EPI_ISL_455567,EPI_ISL_429663,EPI_ISL_454605,EPI_ISL_429705,EPI_ISL_468656,EPI_ISL_429803,EPI_ISL_454606,EPI_ISL_429792,EPI_ISL_468591,EPI_ISL_429659	Institute for Public Health	Laboratory for advanced genomics	Filip Rokić et al
EPI_ISL_418256	Ospedale “San Liberatore” di Atri	Istituto Zooprofilattico Sperimentale dell'Abruzzo e Molise "G. Caporale"	Lorusso A et al
EPI_ISL_462450,EPI_ISL_462451,EPI_ISL_462452,EPI_ISL_462453,EPI_ISL_462454,EPI_ISL_462455,EPI_ISL_462456,EPI_ISL_462457,EPI_ISL_462458,EPI_ISL_462459,EPI_ISL_462460,EPI_ISL_462462,EPI_ISL_462463,EPI_ISL_462464,EPI_ISL_462465,EPI_ISL_462467,EPI_ISL_462468,EPI_ISL_462469,EPI_ISL_462471,EPI_ISL_462473,EPI_ISL_462474,EPI_ISL_462475,EPI_ISL_462476,EPI_ISL_462472,EPI_ISL_462461,EPI_ISL_462466,EPI_ISL_4…	Clinical Center, University of Sarajevo	Charite Universitatsmedizin Berlin, Institute of Virology	Victor M Corman et al
EPI_ISL_534324	Hospital Mun Ver Jose Storopolli	Instituto Adolfo Lutz, Interdiciplinary Procedures Center, Strategic Laboratory	Claudio Tavares Sacchi et al
EPI_ISL_745146	Vredendal Hospital wc VRE	National Health Laboratory Service (NHLS), Tygerberg	Susan Engelbrecht et al
EPI_ISL_469024,EPI_ISL_444460,EPI_ISL_447032	B.J. Medical College and Civil hospital	Gujarat Biotechnology Research Centre	Tejas Shah et al
EPI_ISL_906797,EPI_ISL_965005,EPI_ISL_965006,EPI_ISL_965007,EPI_ISL_964961,EPI_ISL_449789,EPI_ISL_449790,EPI_ISL_449791,EPI_ISL_449792,EPI_ISL_449793,EPI_ISL_449794,EPI_ISL_591021,EPI_ISL_635146,EPI_ISL_590976,EPI_ISL_590977,EPI_ISL_590953,EPI_ISL_590954,EPI_ISL_590955,EPI_ISL_590956,EPI_ISL_590957,EPI_ISL_590958,EPI_ISL_590959,EPI_ISL_590960,EPI_ISL_590961,EPI_ISL_590962,EPI_ISL_590963,EPI_ISL_5…	Dept. of Medical Microbiology, Stavanger University Hospital, Helse Stavanger HF	Norwegian Institute of Public Health, Department of Virology	Kathrine Stene-Johansen et al
EPI_ISL_455352,EPI_ISL_455353,EPI_ISL_455354	Hospital de Cruces	Instituto de Salud Carlos III	Iglesias-Caballero et al
EPI_ISL_569610,EPI_ISL_569624	Avera McKennan Hospital	South Dakota Public Health Laboratory	Matt Plumb et al
EPI_ISL_965912,EPI_ISL_965922,EPI_ISL_965916,EPI_ISL_965920,EPI_ISL_965924,EPI_ISL_977597,EPI_ISL_965925	Servicio Murciano de Salud	Instituto de Salud Carlos III	Vázquez et al
EPI_ISL_906076,EPI_ISL_906077	Hospital Sao Luiz Sao Caetano	Instituto Adolfo Lutz, Interdiciplinary Procedures Center, Strategic Laboratory	Claudio Tavares Sacchi et al
EPI_ISL_955230	Mary Eliza Mahoney HC	NJ Public Health and Environmental Laboratories	Lindsey Bodnar et al
EPI_ISL_475565	Narhalsan Backa vardcentral	The Public Health Agency of Sweden	Oskar Karlsson Lindsjo et al
EPI_ISL_709959,EPI_ISL_709960,EPI_ISL_709961,EPI_ISL_709962,EPI_ISL_709963,EPI_ISL_709964,EPI_ISL_710535,EPI_ISL_709965,EPI_ISL_709966,EPI_ISL_709967,EPI_ISL_709968,EPI_ISL_709969,EPI_ISL_709970,EPI_ISL_709971,EPI_ISL_709972,EPI_ISL_709973,EPI_ISL_709974,EPI_ISL_709975,EPI_ISL_709976,EPI_ISL_709977,EPI_ISL_709978,EPI_ISL_709979,EPI_ISL_709980,EPI_ISL_709981,EPI_ISL_709982,EPI_ISL_709983,EPI_ISL_7…	Microbiology, Department of Pathology, St. Bernard's Hospital, Gibraltar Health Authority	Respiratory Virus Unit, National Infection Service, Public Health England	PHE Covid Sequencing Team et al
EPI_ISL_860898,EPI_ISL_860847	Centre Hospitalier Compiègne-Noyon - Laboratoire	National Reference Center for Viruses of Respiratory Infections, Institut Pasteur, Paris	Marion Barbet et al
EPI_ISL_586532	General Hospital,Chhotaudepur	Gujarat Biotechnology Research Centre	Arti Thakur et al
EPI_ISL_900054,EPI_ISL_940795,EPI_ISL_940803,EPI_ISL_940796,EPI_ISL_940804,EPI_ISL_940801,EPI_ISL_940805,EPI_ISL_940793,EPI_ISL_940797,EPI_ISL_940806,EPI_ISL_940807,EPI_ISL_940808,EPI_ISL_940794,EPI_ISL_940809,EPI_ISL_940810,EPI_ISL_940811,EPI_ISL_940800,EPI_ISL_940812,EPI_ISL_940813,EPI_ISL_940814,EPI_ISL_940815,EPI_ISL_940816,EPI_ISL_940799,EPI_ISL_940798,EPI_ISL_940817,EPI_ISL_940818,EPI_ISL_9…	Houston Health Dept.	Houston Health Dept.	Ryker Penn et al
EPI_ISL_524738	GMERS Medical College and Hospital, Gandhinagar	Gujarat Biotechnology Research Centre	Monika Gandhi et al
EPI_ISL_451150	M.P Shah Government Medocal college Jamnagar	Gujarat Biotechnology Research Centre	Zarna Patel et al
EPI_ISL_476868	Banas Medical College and Research Institute	Gujarat Biotechnology Research Centre	Afzal Ansari et al
EPI_ISL_831378,EPI_ISL_831400,EPI_ISL_831377,EPI_ISL_831381,EPI_ISL_831373,EPI_ISL_831380,EPI_ISL_831375,EPI_ISL_831386,EPI_ISL_831388,EPI_ISL_831387,EPI_ISL_831376,EPI_ISL_831393,EPI_ISL_831389,EPI_ISL_831396,EPI_ISL_831391	Limbach - MVZ Labor Dr. Limbach & Kollegen	Robert Koch Institute, Influenza and respiratory viruses FG17 & Bioinformatics MF1, Berlin, Germany	Dr. Konrad Bode et al
EPI_ISL_977221,EPI_ISL_977222,EPI_ISL_977223,EPI_ISL_977224,EPI_ISL_977225,EPI_ISL_977226,EPI_ISL_977227,EPI_ISL_977228,EPI_ISL_977229,EPI_ISL_977230,EPI_ISL_875551,EPI_ISL_977213,EPI_ISL_977214,EPI_ISL_977215,EPI_ISL_977216,EPI_ISL_977217,EPI_ISL_977218,EPI_ISL_977219,EPI_ISL_977220	ULSS 1 Dolomiti	Istituto Zooprofilattico Sperimentale delle Venezie	Adelaide Milani et al
EPI_ISL_981383,EPI_ISL_981385,EPI_ISL_981387,EPI_ISL_984263	IAL Regional de Bauru	Instituto Adolfo Lutz, Interdiciplinary Procedures Center, Strategic Laboratory	Claudio Tavares Sacchi et al
EPI_ISL_583046,EPI_ISL_583047,EPI_ISL_583048,EPI_ISL_583049,EPI_ISL_583050,EPI_ISL_583051,EPI_ISL_583052,EPI_ISL_583053,EPI_ISL_583054,EPI_ISL_583055,EPI_ISL_583056,EPI_ISL_583057,EPI_ISL_583058,EPI_ISL_583059,EPI_ISL_583060,EPI_ISL_583061,EPI_ISL_583062,EPI_ISL_583063,EPI_ISL_583064,EPI_ISL_583065,EPI_ISL_583066,EPI_ISL_583067,EPI_ISL_583068,EPI_ISL_583069,EPI_ISL_583070,EPI_ISL_583071,EPI_ISL_5…	Humboldt County Public Health Laboratory	Chan-Zuckerberg Biohub	CZB Cliahub Consortium et al
EPI_ISL_672570	Laboratorio de Virología y Microbiología Molecular, Depto. de Microbiología, Facultad de Medicina, Universidad de El Salvador/INS-laboratorio de Ref. Ministerio de Salud	Laboratorio de Virología y Microbiología Molecular, Depto. de Microbiología, Facultad de Medicina, Universidad de El Salvador/INS-laboratorio de Ref. Ministerio de Salud	Ortega Pérez CA et al et al
EPI_ISL_534319,EPI_ISL_534320	Hospital do Serv Pub ESTAFCO Morato de Oliveira	Instituto Adolfo Lutz, Interdiciplinary Procedures Center, Strategic Laboratory	Claudio Tavares Sacchi et al
EPI_ISL_981214,EPI_ISL_981247,EPI_ISL_981248,EPI_ISL_981203,EPI_ISL_605064,EPI_ISL_605077,EPI_ISL_605069,EPI_ISL_605060,EPI_ISL_605071,EPI_ISL_605080,EPI_ISL_605075,EPI_ISL_605070,EPI_ISL_605065,EPI_ISL_605061,EPI_ISL_605066,EPI_ISL_605062,EPI_ISL_605072,EPI_ISL_605067,EPI_ISL_605063,EPI_ISL_605058,EPI_ISL_981208,EPI_ISL_981215,EPI_ISL_981216,EPI_ISL_981217,EPI_ISL_981219,EPI_ISL_981227,EPI_ISL_9…	National Virus Reference Laboratory	Irish Coronavirus Sequencing Consortium - Helixworks	Sachin Chalapati et al
EPI_ISL_862837,EPI_ISL_862838,EPI_ISL_862840,EPI_ISL_862841,EPI_ISL_862842	Fujita Health University Hospital	Fujita health University, School of Medicine, Department of Microbiology	Masahiro suzuki et al
EPI_ISL_451158,EPI_ISL_469034	Government Medical College, Vadodara	Gujarat Biotechnology Research Centre	Nitin Savaliya et al
EPI_ISL_458085	Laboratorio Biologia Molecolare Sars Cov2 - UOC Laboratorio Analisi - Servizio Medicina di Laboratorio , Ospedale "San Francesco" - ATS- ASSL Nuoro	Laboratorio specialistico UOC Ematologia - Ospedale "San Francesco" - ATS-ASSL Nuoro	Piras Giovanna et al
EPI_ISL_467300	General Hospital "Abdulah Nakas"	Alea Genetic Center	Rijad Konjhodzic et al
EPI_ISL_483853,EPI_ISL_483871	Department of Microbiology, Government Medical College, Surat	Gujarat Biotechnology Research Centre	Zuber Saiyed et al
EPI_ISL_768824	Laboratoire BIOLAB33	CNR Virus des Infections Respiratoires - France SUD	Antonin Bal et al
EPI_ISL_576145	RSA Universitas Gadjah Mada	Genetics Working Group (Pokja Genetik) Faculty of Medicine, Public Health and Nursing Universitas Gadjah Mada (FK-KMK UGM); Disease Investigation Center Wates Ministry of Agriculture Indonesia; Department of Microbiology FK-KMK UGM; Laboratorium Diagnostik Yayasan Tahija World Mosquito Program (WMP) Yogyakarta Center for Tropical Medicine FK-KMK UGM; Integrated Research Center FK-KMK UGM; Departm…	Gunadi et al
EPI_ISL_457940,EPI_ISL_457942,EPI_ISL_457946,EPI_ISL_457948,EPI_ISL_457952,EPI_ISL_457953,EPI_ISL_457956,EPI_ISL_457957,EPI_ISL_457958,EPI_ISL_457959,EPI_ISL_457960,EPI_ISL_457961,EPI_ISL_457962,EPI_ISL_457963,EPI_ISL_457965,EPI_ISL_457968,EPI_ISL_457969,EPI_ISL_457972,EPI_ISL_457973,EPI_ISL_480432,EPI_ISL_480435,EPI_ISL_480437	Laboratorio de Biología Molecular Asociación Española Primera en Salud	Departments of Pathology and Medicine, New York University School of Medicine	Maria Victoria Elizondo et al
EPI_ISL_893736,EPI_ISL_893737,EPI_ISL_893738	Massachusetts Department of Public Health	Pathogen Discovery, Respiratory Viruses Branch, Division of Viral Diseases, Centers for Disease Control and Prevention	Yan Li et al
EPI_ISL_527820,EPI_ISL_527821,EPI_ISL_527822,EPI_ISL_527823,EPI_ISL_527824,EPI_ISL_527825,EPI_ISL_527826,EPI_ISL_527827,EPI_ISL_527828,EPI_ISL_527830,EPI_ISL_527831,EPI_ISL_527832,EPI_ISL_527833,EPI_ISL_527834,EPI_ISL_527835,EPI_ISL_527836,EPI_ISL_527838,EPI_ISL_527839,EPI_ISL_527840,EPI_ISL_527841,EPI_ISL_527842,EPI_ISL_527843,EPI_ISL_527844,EPI_ISL_527846,EPI_ISL_527847,EPI_ISL_527848,EPI_ISL_5…	Texas Department of State Health Services	Texas Department of State Health Services	Bonnie Oh et al
EPI_ISL_678486,EPI_ISL_678489,EPI_ISL_678491,EPI_ISL_678487,EPI_ISL_678492,EPI_ISL_678488,EPI_ISL_678490,EPI_ISL_678493	Veterinary Specialized Institute "Sabac", Serbia	Veterinary Specialized Institute "Kraljevo", Serbia	Vidanovic et al
EPI_ISL_547574,EPI_ISL_468318,EPI_ISL_468321	Hospital Universitario da USP	Instituto Adolfo Lutz, Interdiciplinary Procedures Center, Strategic Laboratory	Claudio Tavares Sacchi et al
EPI_ISL_464167,EPI_ISL_450805	VI-US Virgin Islands Department of Health	Pathogen Discovery, Respiratory Viruses Branch, Division of Viral Diseases, Centers for Disease Control and Prevention	Krista Queen et al
EPI_ISL_861889,EPI_ISL_861911,EPI_ISL_861914	Genomika Einstein	LATE - Laboratório de Técnicas Especiais - Hospital Israelita Albert Einstein	Deyvid Amgarten et al
EPI_ISL_522556,EPI_ISL_522557,EPI_ISL_522558,EPI_ISL_522559,EPI_ISL_522560,EPI_ISL_522561,EPI_ISL_522562,EPI_ISL_522563,EPI_ISL_522564,EPI_ISL_522565,EPI_ISL_522566,EPI_ISL_522567,EPI_ISL_522568,EPI_ISL_522569,EPI_ISL_522570,EPI_ISL_522571,EPI_ISL_522572,EPI_ISL_522573,EPI_ISL_522574,EPI_ISL_522575,EPI_ISL_522576,EPI_ISL_522577,EPI_ISL_522578,EPI_ISL_522579,EPI_ISL_522580,EPI_ISL_522581,EPI_ISL_5…	Royal Hobart Hospital Microbiology Department	MDU-PHL	Cooley L. et al
EPI_ISL_468726	unknown	Department of Microbiology	Peng et al
EPI_ISL_501614,EPI_ISL_501626,EPI_ISL_501629,EPI_ISL_501624,EPI_ISL_501620,EPI_ISL_501628,EPI_ISL_501621,EPI_ISL_501618,EPI_ISL_501623,EPI_ISL_501625,EPI_ISL_501627,EPI_ISL_501630,EPI_ISL_501615,EPI_ISL_501616,EPI_ISL_501619,EPI_ISL_501617,EPI_ISL_501622,EPI_ISL_501631	Lab Microbiology, Pathology Department, William Harvey Hospital	Wellcome Sanger Institute for the COVID-19 Genomics UK (COG-UK) consortium	Samuel Moses et al
EPI_ISL_738723,EPI_ISL_850019,EPI_ISL_850020,EPI_ISL_850021,EPI_ISL_850022,EPI_ISL_850023,EPI_ISL_850024,EPI_ISL_739394,EPI_ISL_850025,EPI_ISL_850026,EPI_ISL_850027,EPI_ISL_850029,EPI_ISL_850030,EPI_ISL_850031,EPI_ISL_850032,EPI_ISL_850033,EPI_ISL_850034,EPI_ISL_850035,EPI_ISL_850036,EPI_ISL_850037,EPI_ISL_850038,EPI_ISL_850039,EPI_ISL_850040,EPI_ISL_850041,EPI_ISL_850042,EPI_ISL_850043,EPI_ISL_8…	Renegade	Chan-Zuckerberg Biohub	CZB Cliahub Consortium et al
EPI_ISL_791991,EPI_ISL_791992,EPI_ISL_791993,EPI_ISL_791994,EPI_ISL_791995,EPI_ISL_791996,EPI_ISL_791997,EPI_ISL_791998,EPI_ISL_791999	CHU - Hôpital Cavale Blanche	National Reference Center for Viruses of Respiratory Infections, Institut Pasteur, Paris	Marion Barbet et al
EPI_ISL_910333	General Hospital - Ohrid	Research Center for Genetic Engineering and Biotechnology "Georgi D. Efremov” , Macedoni	RCGEB - MASA et al
EPI_ISL_882670	Hospital Samaritano Paulista	Instituto Adolfo Lutz, Interdiciplinary Procedures Center, Strategic Laboratory	Claudio Tavares Sacchi et al
EPI_ISL_455025,EPI_ISL_469029	Government Medical College, Vadodara	Gujarat Biotechnology Research Centre	Zarna Patel et al
EPI_ISL_467430	Zoonotic and Exotic infection Diseases Division	Zoontic and Exotic infection Diseases Division	Jinlang Wang et al
EPI_ISL_524757	GMERS Medical College and Hospital, Dharpur, Patan	Gujarat Biotechnology Research Centre	Raghawendra Kumar et al
EPI_ISL_455480,EPI_ISL_454795	Veterinary Specialized Institute Kraljevo	Veterinary Specialized Institute Kraljevo	Vidanovic et al
EPI_ISL_480328	Laboratorio LABIN	Charité Virology-University of Costa Rica	Andres Moreira-Soto et al
EPI_ISL_458090,EPI_ISL_461506,EPI_ISL_467053,EPI_ISL_444458,EPI_ISL_447030	B.J. Medical College and Civil hospital	Gujarat Biotechnology Research Centre	Kamlesh J Upadhyay et al
EPI_ISL_436939,EPI_ISL_436940,EPI_ISL_436941,EPI_ISL_436942,EPI_ISL_436943,EPI_ISL_436944,EPI_ISL_436945,EPI_ISL_436946,EPI_ISL_436947,EPI_ISL_436948,EPI_ISL_436949,EPI_ISL_436950,EPI_ISL_436952,EPI_ISL_436953,EPI_ISL_436954,EPI_ISL_436955,EPI_ISL_436956,EPI_ISL_436957,EPI_ISL_436958,EPI_ISL_436959,EPI_ISL_436960,EPI_ISL_436961	Ochsner Health	Bioinfoexperts, LLC	Amy Feehan et al
EPI_ISL_530025,EPI_ISL_530026,EPI_ISL_530027,EPI_ISL_530028,EPI_ISL_530029,EPI_ISL_530030,EPI_ISL_530031,EPI_ISL_530032,EPI_ISL_530033,EPI_ISL_534330,EPI_ISL_534331,EPI_ISL_534332,EPI_ISL_534333,EPI_ISL_530034,EPI_ISL_530035,EPI_ISL_530036,EPI_ISL_530037,EPI_ISL_530038,EPI_ISL_530039,EPI_ISL_530040,EPI_ISL_530041,EPI_ISL_530042,EPI_ISL_530043,EPI_ISL_530070,EPI_ISL_530071,EPI_ISL_530072,EPI_ISL_5…	Hospital Universitario La Paz	Hospital Universitario La Paz	María Rodríguez et al
EPI_ISL_862564,EPI_ISL_862565,EPI_ISL_862556,EPI_ISL_539524,EPI_ISL_862567,EPI_ISL_862640,EPI_ISL_954806	Gerencia de Asistencia Sanitaria de Soria	Instituto de Salud Carlos III	Iglesias-Caballero et al
EPI_ISL_416488	ViroGenetics - BSL3 Laboratory of Virology; Human Genome Variation Research Group & Genomics Centre MCB; Bioinformatics Research Group Department of Virology	ViroGenetics - BSL3 Laboratory of Virology; Human Genome Variation Research Group & Genomics Centre MCB; Bioinformatics Research Group Department of Virology	Aleksandra Milewska et al
EPI_ISL_914825	AREA DE SALUD MORAVIA	Inciensa, Instituto Costarricense de Investigación y Enseñanza en Nutrición y Salud	Francisco Duarte et al
EPI_ISL_417963,EPI_ISL_417967,EPI_ISL_417952,EPI_ISL_417954,EPI_ISL_417956,EPI_ISL_417957,EPI_ISL_418182,EPI_ISL_417961	Hospital Universitario 12 de Octubre	Hospital Universitario La Paz	Elias Dahdouh et al
EPI_ISL_754239	Santosa Hospital Bandung Central	"School of Life Sciences and Technology & School of Pharmacy-Institut Teknologi Bandung; Molecular Genetics Laboratory-Faculty of Medicine-Universitas Padjadjaran; Laboratorium Kesehatan Provinsi Jawa Barat"	Marselina Irasonia Tan et al
EPI_ISL_977581,EPI_ISL_977583,EPI_ISL_977584,EPI_ISL_977594,EPI_ISL_977538,EPI_ISL_977539	Caribbean Public Health Agency	Carrington Lab, Department of PreClinical Sciences	Nikita S. D. Sahadeo et al
EPI_ISL_691731	Hospital Universitario Puerta de Hierro	Instituto de Salud Carlos III	Iglesias-Caballero et al
EPI_ISL_476856,EPI_ISL_495034,EPI_ISL_495052	GMERS Medical College & Hospital, Gotri, Vadodara	Gujarat Biotechnology Research Centre	Janvi Raval et al
EPI_ISL_467666	Virology lab, NIC, NCCD, Ulaanbaatar, Mongolia	National Centre for Communicable Deseases (NCCD)	Naranzul Ts et al
EPI_ISL_524734,EPI_ISL_524765	GMERS Medical College and Hospital, Dharpur, Patan	Gujarat Biotechnology Research Centre	Apurvasinh Puvar et al
EPI_ISL_417413,EPI_ISL_437316,EPI_ISL_437322,EPI_ISL_437331,EPI_ISL_437334,EPI_ISL_429871,EPI_ISL_437317,EPI_ISL_437309,EPI_ISL_437310,EPI_ISL_812775,EPI_ISL_812776,EPI_ISL_812761,EPI_ISL_811136,EPI_ISL_812762,EPI_ISL_429872,EPI_ISL_429873,EPI_ISL_812763,EPI_ISL_812764,EPI_ISL_812766,EPI_ISL_437333,EPI_ISL_812767,EPI_ISL_811137,EPI_ISL_811138,EPI_ISL_812769,EPI_ISL_812770,EPI_ISL_811143,EPI_ISL_8…	Ministry of Health Turkey	Ministry of Health Turkey	Fatma Bayrakdar et al
EPI_ISL_700445	Heideveld Emergency Centre	NHLS/UCT	Houriiyah Tegally et al
EPI_ISL_647985,EPI_ISL_812202,EPI_ISL_812203,EPI_ISL_424887	RI State Health Laboratories	Pathogen Discovery, Respiratory Viruses Branch, Division of Viral Diseases, Centers for Disease Control and Prevention	Yan Li et al
EPI_ISL_944653,EPI_ISL_944732,EPI_ISL_944671,EPI_ISL_944684,EPI_ISL_944733,EPI_ISL_944654,EPI_ISL_944695,EPI_ISL_944663,EPI_ISL_944670,EPI_ISL_944702,EPI_ISL_944655,EPI_ISL_944701,EPI_ISL_944675,EPI_ISL_944662,EPI_ISL_944678,EPI_ISL_944659,EPI_ISL_944651,EPI_ISL_944719,EPI_ISL_944652,EPI_ISL_944691,EPI_ISL_944712,EPI_ISL_944724,EPI_ISL_944669,EPI_ISL_944697,EPI_ISL_944698,EPI_ISL_944683,EPI_ISL_9…	Department of Biochemistry, Cell and Molecular Biology, West African Centre for Cell Biology of Infectious Pathogens (WACCBIP), University of Ghana	Department of Biochemistry, Cell and Molecular Biology, West African Centre for Cell Biology of Infectious Pathogens (WACCBIP), University of Ghana	Morang'a et al
EPI_ISL_710592,EPI_ISL_710593	MLF Care AB	The Public Health Agency of Sweden	Department of Microbiology et al
EPI_ISL_529147,EPI_ISL_529148	Democritus University of Thrace, Department of Medicine	Democritus University of Thrace, Department of Medicine	Kassela et al
EPI_ISL_467516	CAPRISA	KRISP, KZN Research Innovation and Sequencing Platform	Giandhari J et al
EPI_ISL_574598	Servico de Verificacao de Obito SVO	Instituto Adolfo Lutz, Interdiciplinary Procedures Center, Strategic Laboratory	Claudio Tavares Sacchi et al
EPI_ISL_458099,EPI_ISL_467050	B.J. Medical College and Civil hospital	Gujarat Biotechnology Research Centre	Labdhi Pandya et al
EPI_ISL_431117	Department of Microbiology, Gandhi Medical College and Hospital, Secendrabad, Hyderabad, India	Department of Microbiology, Gandhi Medical College and Hospital, Secendrabad, Hyderabad, India	Thrilok Chander B et al
EPI_ISL_794107,EPI_ISL_794108,EPI_ISL_794109,EPI_ISL_794110,EPI_ISL_794111,EPI_ISL_794112,EPI_ISL_794113,EPI_ISL_794114,EPI_ISL_794115,EPI_ISL_794116,EPI_ISL_794117,EPI_ISL_794118	GLENS FALLS HOSPITAL LABORATORY	Wadsworth Center, New York State Department.of Health	Kirsten St. George et al
EPI_ISL_468749,EPI_ISL_468751,EPI_ISL_468748,EPI_ISL_468747,EPI_ISL_468750	Facultad de Medicina UC	Center for Mathematical Modeling and Center for Genome Regulation. Santiago, Chile	Gaete A et al
EPI_ISL_426583	Microbial Genomics Laboratory, Institut Pasteur Monteivdeo	Microbial Genomics Laboratory, Institut Pasteur Montevideo, Uruguay	Cecilia Salazar et al
EPI_ISL_510531	Communicable Disease Laboratory, Public Health Directorate	Communicable Disease Laboratory, Public Health Directorate	Shehab et al
EPI_ISL_524740,EPI_ISL_447548	GMERS Medical College and Hospital, Gandhinagar	Gujarat Biotechnology Research Centre	Maharshi Pandya et al
EPI_ISL_462266,EPI_ISL_462175,EPI_ISL_462196,EPI_ISL_462258,EPI_ISL_462177,EPI_ISL_462189,EPI_ISL_464074,EPI_ISL_462216,EPI_ISL_462260,EPI_ISL_462174,EPI_ISL_462201,EPI_ISL_462213,EPI_ISL_462215,EPI_ISL_464065,EPI_ISL_462210,EPI_ISL_462199,EPI_ISL_462166,EPI_ISL_462188,EPI_ISL_462182,EPI_ISL_464070,EPI_ISL_462186,EPI_ISL_462223,EPI_ISL_462172,EPI_ISL_462194,EPI_ISL_462209,EPI_ISL_462204,EPI_ISL_4…	KU Leuven, Rega Institute, Clinical and Epidemiological Virology	KU Leuven, Rega Institute, Clinical and Epidemiological Virology	Tony Wawina-Bokalanga et al
EPI_ISL_978543	Centre de Virologie des Maladies infectueuses Tropicales	Functional Genomic Platform UATRS-biology, CNRST	Yassine SEKHSOKH et al
EPI_ISL_418226	EHPAD - Résidences les Cèdres	National Reference Center for Viruses of Respiratory Infections, Institut Pasteur, Paris	Mélanie Albert et al
EPI_ISL_417986,EPI_ISL_417987,EPI_ISL_417989	Centro Hospitalar e Universitario de Sao Joao, Porto	Instituto Nacional de Saude (INSA)	Guiomar et al et al
EPI_ISL_418002	CHU Coimbra	Instituto Nacional de Saude (INSA)	Guiomar et al et al
EPI_ISL_515932,EPI_ISL_515945,EPI_ISL_486401,EPI_ISL_515947,EPI_ISL_515948,EPI_ISL_486402,EPI_ISL_486387,EPI_ISL_486403,EPI_ISL_515949,EPI_ISL_515954,EPI_ISL_515955,EPI_ISL_486405,EPI_ISL_486406,EPI_ISL_515957,EPI_ISL_486388,EPI_ISL_515958,EPI_ISL_515959,EPI_ISL_486408,EPI_ISL_515961,EPI_ISL_486389,EPI_ISL_486409,EPI_ISL_515962,EPI_ISL_515965	DH	Department of Neurovirology, National Institute of Mental Health and Neuroscience (NIMHANS)	Chitra Pattabiraman et al
EPI_ISL_527752,EPI_ISL_769990	Hospital Dr. Rafael A. Calderon Guardia	Inciensa, Instituto Costarricense de Investigación y Enseñanza en Nutrición y Salud	Francisco Duarte et al
EPI_ISL_802994,EPI_ISL_802995	Charité Universitätsmedizin Berlin, Institut für Virologie, Charitéplatz 1, 10117 Berlin, Germany	Charité Universitätsmedizin Berlin, Institut für Virologie, Charitéplatz 1, 10117 Berlin, Germany	Victor M Corman et al
EPI_ISL_522407,EPI_ISL_522408	Department of Infection Prevention and Infectious Diseases, University Hospital Regensburg	Department of Infection Prevention and Infectious Diseases, University Hospital Regensburg	Fritsch et al
EPI_ISL_654874	Pasteur Institute in Ho Chi Minh city	Department of Microbiology and Immunology - Pasteur Institute in Ho Chi Minh city	Nguyễn Thị Ngọc Thảo et al
EPI_ISL_471178,EPI_ISL_471179,EPI_ISL_471180,EPI_ISL_471181,EPI_ISL_471182,EPI_ISL_471183,EPI_ISL_471184,EPI_ISL_471185,EPI_ISL_471186,EPI_ISL_471187,EPI_ISL_471188,EPI_ISL_471189,EPI_ISL_471190,EPI_ISL_471191,EPI_ISL_471192,EPI_ISL_471193,EPI_ISL_471194,EPI_ISL_471195,EPI_ISL_471196,EPI_ISL_471197,EPI_ISL_471198,EPI_ISL_471199,EPI_ISL_471200,EPI_ISL_471201,EPI_ISL_471202,EPI_ISL_471203,EPI_ISL_4…	Wisconsin State Laboratory of Hygiene Communicable Disease Division	Wisconsin State Laboratory of Hygiene Communicable Disease Division	Kelsey R. Florek et al
EPI_ISL_803561,EPI_ISL_803562,EPI_ISL_803563,EPI_ISL_803564,EPI_ISL_803565,EPI_ISL_803566,EPI_ISL_803567,EPI_ISL_803568,EPI_ISL_803569,EPI_ISL_803570,EPI_ISL_803571,EPI_ISL_803572,EPI_ISL_803573,EPI_ISL_803574,EPI_ISL_803575,EPI_ISL_803576,EPI_ISL_803577,EPI_ISL_803578,EPI_ISL_803579,EPI_ISL_803580,EPI_ISL_803581,EPI_ISL_803582,EPI_ISL_803583,EPI_ISL_803584,EPI_ISL_803585,EPI_ISL_803586,EPI_ISL_8…	Wisconsin State Laboratory of Hygiene Communicable Disease Division	Wisconsin State Laboratory of Hygiene Communicable Disease Division	Kelsey R. Florek et al
EPI_ISL_512918,EPI_ISL_512919,EPI_ISL_636961,EPI_ISL_512920,EPI_ISL_512921,EPI_ISL_512922,EPI_ISL_512923,EPI_ISL_512924,EPI_ISL_512925,EPI_ISL_512926,EPI_ISL_512927,EPI_ISL_512928,EPI_ISL_512929,EPI_ISL_512930,EPI_ISL_512931,EPI_ISL_512932,EPI_ISL_512933,EPI_ISL_512934,EPI_ISL_512935,EPI_ISL_512936,EPI_ISL_512937,EPI_ISL_512938,EPI_ISL_512939,EPI_ISL_512940,EPI_ISL_512941,EPI_ISL_512942,EPI_ISL_5…	Pathogen Genomics Lab King Abdullah University of Science and Technology(KAUST)	Pathogen Genomics Lab King Abdullah University of Science and Technology(KAUST)	Fadwa Alofi et al
EPI_ISL_634857	Minneapolis VA Health Care System	Minnesota Department of Health, Public Health Laboratory	Matt Plumb et al
EPI_ISL_876506,EPI_ISL_876377,EPI_ISL_872474,EPI_ISL_875592,EPI_ISL_875652,EPI_ISL_875944,EPI_ISL_876489,EPI_ISL_876491,EPI_ISL_876503,EPI_ISL_876505,EPI_ISL_876510,EPI_ISL_876512,EPI_ISL_876469,EPI_ISL_876471,EPI_ISL_876391,EPI_ISL_876392,EPI_ISL_883266,EPI_ISL_872395,EPI_ISL_872399,EPI_ISL_872424,EPI_ISL_872429,EPI_ISL_872436,EPI_ISL_872439,EPI_ISL_872477,EPI_ISL_875621,EPI_ISL_875574,EPI_ISL_8…	Eurofins Diatherix	Hudsonalpha Genome Sequencing Center	Jane Grimwood et al
EPI_ISL_979497,EPI_ISL_979498,EPI_ISL_979499,EPI_ISL_979500,EPI_ISL_979501,EPI_ISL_979502,EPI_ISL_979503,EPI_ISL_979504,EPI_ISL_979505,EPI_ISL_979506,EPI_ISL_979507,EPI_ISL_979508,EPI_ISL_979509,EPI_ISL_979510,EPI_ISL_979511,EPI_ISL_979512,EPI_ISL_979513,EPI_ISL_979514,EPI_ISL_979515,EPI_ISL_979516,EPI_ISL_979517,EPI_ISL_979518,EPI_ISL_979519,EPI_ISL_979520,EPI_ISL_979521,EPI_ISL_979522,EPI_ISL_9…	Eurofins Diatherix	Hudsonalpha Genome Sequencing Center	Jane Grimwood et al
EPI_ISL_476559	unknown	Laboratoire Sciences et Technologies de la Santé (STS) Institut Supérieur des Sciences de la Santé Université Hassan 1er, Settat, Morocco	Hajar Lemriss et al
EPI_ISL_459877,EPI_ISL_459878,EPI_ISL_529030,EPI_ISL_459866,EPI_ISL_459869,EPI_ISL_459871,EPI_ISL_459872,EPI_ISL_459873,EPI_ISL_459874,EPI_ISL_459875,EPI_ISL_459867,EPI_ISL_459879,EPI_ISL_459880,EPI_ISL_459881,EPI_ISL_459882,EPI_ISL_459883,EPI_ISL_459885,EPI_ISL_459886,EPI_ISL_459887,EPI_ISL_459888,EPI_ISL_459889,EPI_ISL_459890,EPI_ISL_459868,EPI_ISL_459891,EPI_ISL_459892	Kingston Health Sciences Center	Queen's Genomics Lab at Ongwanada (Q-GLO)	Sjaarda CP et al
EPI_ISL_944785	Laboratory of Microbiology and Virology, Ospedale Amedeo di Savoia, ASL "Città di Torino"	U.O. Genomics, S.S. Genetics and Advanced Omics Techniques, Istituto Zooprofilattico Sperimentale del Piemonte Liguria e Valle d'Aosta	Chiara Beltramo et al
EPI_ISL_965224	OSPEDALE SS. ANNUNZIATA CHIETI	Istituto Zooprofilattico Sperimentale dell’Abruzzo e Molise “G. Caporale”	Lorusso A et al
EPI_ISL_959551,EPI_ISL_959552	CHC Liège	GIGA Medical Genomics	Keith Durkin et al
EPI_ISL_779711,EPI_ISL_889309,EPI_ISL_889310,EPI_ISL_889311,EPI_ISL_889312,EPI_ISL_889313,EPI_ISL_889314,EPI_ISL_889315,EPI_ISL_889316,EPI_ISL_889317,EPI_ISL_889318,EPI_ISL_889319,EPI_ISL_889320,EPI_ISL_889321,EPI_ISL_889322,EPI_ISL_889323,EPI_ISL_889324,EPI_ISL_889325,EPI_ISL_889326,EPI_ISL_889327,EPI_ISL_889331,EPI_ISL_889332,EPI_ISL_889334,EPI_ISL_889336,EPI_ISL_889337,EPI_ISL_889338,EPI_ISL_8…	The University Hospital Brno	Institute of Applied Biotechnologies a.s.	Petr Klempt et al
EPI_ISL_535662,EPI_ISL_535663,EPI_ISL_535664,EPI_ISL_535665,EPI_ISL_535666,EPI_ISL_535667,EPI_ISL_535668,EPI_ISL_535669,EPI_ISL_535670,EPI_ISL_535671,EPI_ISL_535672,EPI_ISL_535673,EPI_ISL_535674,EPI_ISL_535676,EPI_ISL_535677,EPI_ISL_535678,EPI_ISL_535679,EPI_ISL_535680,EPI_ISL_535681,EPI_ISL_535682,EPI_ISL_535683,EPI_ISL_535684,EPI_ISL_535685,EPI_ISL_535686,EPI_ISL_535687,EPI_ISL_535688,EPI_ISL_5…	CDPH, Microbial Diseases Laboratory	Pathogen Discovery, Respiratory Viruses Branch, Division of Viral Diseases, Centers for Disease Control and Prevention	Yan Li et al
EPI_ISL_582369,EPI_ISL_582370,EPI_ISL_582371,EPI_ISL_582372,EPI_ISL_582373,EPI_ISL_582374,EPI_ISL_582375,EPI_ISL_582376,EPI_ISL_582377,EPI_ISL_582378,EPI_ISL_582379,EPI_ISL_582380,EPI_ISL_582381,EPI_ISL_582382,EPI_ISL_582383,EPI_ISL_582384,EPI_ISL_582385,EPI_ISL_582386,EPI_ISL_582387,EPI_ISL_582388,EPI_ISL_582389,EPI_ISL_582390,EPI_ISL_582391,EPI_ISL_582392,EPI_ISL_582393,EPI_ISL_582394,EPI_ISL_5…	Cadham Provincial Laboratory	National Microbiology Laboratory (NML)	Anna Majer et al
EPI_ISL_961748,EPI_ISL_961738,EPI_ISL_961723,EPI_ISL_961739,EPI_ISL_961712,EPI_ISL_961713,EPI_ISL_961673	SIESP CHIETI DRIVE IN LANCIANO	Istituto Zooprofilattico Sperimentale dell’Abruzzo e Molise “G. Caporale”	Lorusso A et al
EPI_ISL_416465,EPI_ISL_416466,EPI_ISL_430113,EPI_ISL_430114,EPI_ISL_430115,EPI_ISL_430116,EPI_ISL_430117,EPI_ISL_430118,EPI_ISL_430119,EPI_ISL_430121,EPI_ISL_430122,EPI_ISL_430123,EPI_ISL_430124,EPI_ISL_430125,EPI_ISL_430126,EPI_ISL_430127,EPI_ISL_430128,EPI_ISL_430129,EPI_ISL_430130,EPI_ISL_430131,EPI_ISL_430132,EPI_ISL_430133,EPI_ISL_430134,EPI_ISL_430135,EPI_ISL_430136,EPI_ISL_430137,EPI_ISL_4…	Seattle Flu Study	Seattle Flu Study	Chu et al et al
EPI_ISL_807150	Makmal Kesihatan Awam Kebangsaan, Kementerian Kesihatan Malaysia.	Integrative Pharmacogenomics Institute (iPROMISE)	Mohd Zaki Salleh et al
EPI_ISL_933765,EPI_ISL_933764,EPI_ISL_933763,EPI_ISL_933762,EPI_ISL_933761,EPI_ISL_933760,EPI_ISL_933759,EPI_ISL_933758,EPI_ISL_933757,EPI_ISL_933756,EPI_ISL_933755,EPI_ISL_933754,EPI_ISL_933753,EPI_ISL_933752,EPI_ISL_933751,EPI_ISL_933750,EPI_ISL_933749,EPI_ISL_933748,EPI_ISL_933747,EPI_ISL_933746,EPI_ISL_933745,EPI_ISL_933744,EPI_ISL_933743,EPI_ISL_933742,EPI_ISL_933741,EPI_ISL_933739,EPI_ISL_9…	DPHL	Delaware Public Health Lab	Gregory Hovan et al
EPI_ISL_471648	UBS e Pronto Socorro Jd. Jacira	Instituto Adolfo Lutz, Interdiciplinary Procedures Center, Strategic Laboratory	Claudio Tavares Sacchi et al
EPI_ISL_425178,EPI_ISL_425179,EPI_ISL_425192,EPI_ISL_425212	Servicio de Microbiología. Consorcio Hospital General Universitario de Valencia	Sequencing and Bioinformatics Service and Molecular Epidemiology Research Group. FISABIO-Public Health	David Navarro et al
EPI_ISL_603028	Hospital Municipal Santa Ana	Instituto Adolfo Lutz, Interdiciplinary Procedures Center, Strategic Laboratory	Claudio Tavares Sacchi et al
EPI_ISL_436050,EPI_ISL_436051,EPI_ISL_436052,EPI_ISL_436053,EPI_ISL_436054,EPI_ISL_436055,EPI_ISL_436056,EPI_ISL_436057,EPI_ISL_436058,EPI_ISL_436059,EPI_ISL_436060,EPI_ISL_436061,EPI_ISL_436062,EPI_ISL_436063,EPI_ISL_436064,EPI_ISL_436065,EPI_ISL_436066,EPI_ISL_436067,EPI_ISL_436068,EPI_ISL_436069,EPI_ISL_436070,EPI_ISL_436071,EPI_ISL_436047,EPI_ISL_436072,EPI_ISL_436073,EPI_ISL_436048,EPI_ISL_4…	NYC Department of Health and Mental Hygiene	Pathogen Discovery, Respiratory Viruses Branch, Division of Viral Diseases, Centers for Disease Control and Prevention	Ying Tao et al
EPI_ISL_654886,EPI_ISL_654887	Pasteur Institute in Ho Chi Minh city	Department of Microbiology and Immunology - Pasteur Institute in Ho Chi Minh city	Phan Trọng Lân et al
EPI_ISL_888987	RS Citra Medika Depok	Eijkman Institute for Molecular Biology, Ministry of Research and Technology/National Agency for Research and Innovation	Frilasita A Yudhaputri et al
EPI_ISL_632257,EPI_ISL_632256,EPI_ISL_632905,EPI_ISL_632258	Communicable Disease Laboratory, Public Health Directorate	Communicable Disease Laboratory, Public Health Directorate	AlHujairi et al
EPI_ISL_960123	Kwanokuthula CDC wc KWA	National Health Laboratory Service/UCT	Arash Iranzadeh et al
EPI_ISL_634835,EPI_ISL_700366	Laboratoire de virologie, CHU de Grenoble - CS 10217 - 38043 Grenoble cedex 27	CNR Virus des Infections Respiratoires - France SUD	Antonin Bal et al
EPI_ISL_935022,EPI_ISL_832204,EPI_ISL_832203,EPI_ISL_934977	Northwest Pathology	UW Virology Lab	Pavitra Roychoudhury et al
EPI_ISL_960131,EPI_ISL_960138,EPI_ISL_960114,EPI_ISL_960150,EPI_ISL_960113,EPI_ISL_960108,EPI_ISL_960099,EPI_ISL_960101,EPI_ISL_960094	Victoria Hospital wc VHW	National Health Laboratory Service/UCT	Arash Iranzadeh et al
EPI_ISL_934405,EPI_ISL_934987,EPI_ISL_935000,EPI_ISL_935001,EPI_ISL_935002,EPI_ISL_935003,EPI_ISL_934989,EPI_ISL_934986,EPI_ISL_935004,EPI_ISL_935005,EPI_ISL_934980,EPI_ISL_935006,EPI_ISL_935007,EPI_ISL_935008,EPI_ISL_935009,EPI_ISL_935010,EPI_ISL_934990,EPI_ISL_934991,EPI_ISL_935011,EPI_ISL_934981,EPI_ISL_934982,EPI_ISL_934983,EPI_ISL_934978,EPI_ISL_934979,EPI_ISL_934992,EPI_ISL_934988,EPI_ISL_9…	ADMED Microbiologie	Genomics and Transcriptomics, Philip Morris International	Reto Lienhard et al
EPI_ISL_905764	Zakład Diagnostyki Laboratoryjnej i Mikrobiologii, Wojewódzki Szpital Podkarpacki w Krośnie	National Institute of Public Health - National Institute of Hygiene	Wołkowicz Tomasz et al
EPI_ISL_430484,EPI_ISL_430485,EPI_ISL_430486,EPI_ISL_430487,EPI_ISL_430488,EPI_ISL_430491,EPI_ISL_430473,EPI_ISL_430560,EPI_ISL_430547,EPI_ISL_430548,EPI_ISL_430553,EPI_ISL_430555,EPI_ISL_430559,EPI_ISL_430476,EPI_ISL_430489,EPI_ISL_430490,EPI_ISL_430530,EPI_ISL_430531,EPI_ISL_430532,EPI_ISL_430533,EPI_ISL_430534,EPI_ISL_430535,EPI_ISL_430536,EPI_ISL_430538,EPI_ISL_430539,EPI_ISL_430540,EPI_ISL_4…	Victorian Infectious Diseases Reference Laboratory (VIDRL)	Microbiological Diagnostic Unit Public Health Laboratory and Victorian Infectious Diseases Reference Laboratory, The Peter Doherty Institute for Infection and Immunity	Caly L. et al
EPI_ISL_791983	RSUD dr. Kanujoso Djatiwibowo Balikpapan	National Institute of Health Research and Development	Subangkit et al
EPI_ISL_745154,EPI_ISL_745113,EPI_ISL_745132	Dr Ivan Toms Clinic wc IVT	National Health Laboratory Service (NHLS), Tygerberg	Susan Engelbrecht et al
EPI_ISL_779155,EPI_ISL_779156,EPI_ISL_770555,EPI_ISL_770556,EPI_ISL_770557,EPI_ISL_770558,EPI_ISL_770559,EPI_ISL_770560,EPI_ISL_770561,EPI_ISL_770562,EPI_ISL_770563,EPI_ISL_770564,EPI_ISL_770565,EPI_ISL_770566,EPI_ISL_770567,EPI_ISL_770568,EPI_ISL_770569,EPI_ISL_770570,EPI_ISL_770571,EPI_ISL_770572,EPI_ISL_779157,EPI_ISL_770573,EPI_ISL_770574,EPI_ISL_779158,EPI_ISL_770575,EPI_ISL_770576,EPI_ISL_7…	Laboratório de Microbiologia Molecular - Universidade FEEVALE	Bioinformatics Laboratory / LNCC	Felipe Benites et al
EPI_ISL_729869,EPI_ISL_729902,EPI_ISL_729903,EPI_ISL_729904,EPI_ISL_729905,EPI_ISL_729906,EPI_ISL_729907,EPI_ISL_729908,EPI_ISL_729909,EPI_ISL_729910,EPI_ISL_729911,EPI_ISL_729912,EPI_ISL_729913,EPI_ISL_729914,EPI_ISL_729870,EPI_ISL_729915,EPI_ISL_729916,EPI_ISL_729917,EPI_ISL_729918,EPI_ISL_729919,EPI_ISL_729871	Instituto de Medicina Tropical, Universidad Nacional Toribio Rodríguez de Mendoza de Amazonas	Laboratorio de Genómica Microbiana, Universidad Peruana Cayetano Heredia	Pablo Tsukayama et al
EPI_ISL_833413	City of Hope Comprehensive Cancer Center	Los Angeles County PHL	P. Hemarajata et al. et al
EPI_ISL_468615,EPI_ISL_468616,EPI_ISL_468617,EPI_ISL_468618,EPI_ISL_468619,EPI_ISL_468620,EPI_ISL_468621,EPI_ISL_468622,EPI_ISL_468623,EPI_ISL_468624,EPI_ISL_468625,EPI_ISL_468626,EPI_ISL_468627,EPI_ISL_468628,EPI_ISL_468629,EPI_ISL_468630,EPI_ISL_468631,EPI_ISL_468632,EPI_ISL_468633,EPI_ISL_468634,EPI_ISL_468635,EPI_ISL_468636,EPI_ISL_468637,EPI_ISL_468638,EPI_ISL_468639,EPI_ISL_468640,EPI_ISL_4…	Contra Costa Public Health Lab	Chan-Zuckerberg Biohub	CZB Cliahub Consortium et al
EPI_ISL_605805,EPI_ISL_578697,EPI_ISL_605806,EPI_ISL_605807,EPI_ISL_605808,EPI_ISL_605799,EPI_ISL_605800,EPI_ISL_605801,EPI_ISL_605809,EPI_ISL_605810,EPI_ISL_605811,EPI_ISL_605812,EPI_ISL_605802,EPI_ISL_605803,EPI_ISL_605813,EPI_ISL_605804,EPI_ISL_605814,EPI_ISL_605815,EPI_ISL_605816	Clinical Virology Laboratory, Institute of Liver and Biliary Sciences	ILBS - IGIB	Ekta Gupta et al
EPI_ISL_470589,EPI_ISL_470590,EPI_ISL_470591,EPI_ISL_470593,EPI_ISL_470594,EPI_ISL_470595,EPI_ISL_470596	Simile	Bioinformatics Laboratory / LNCC	Alexandra Gerber et al
EPI_ISL_717978	Army Medical Center, Scientific Department, Virology Laboratory	Army Medical Center, Scientific Department, Virology Laboratory	Silvia Fillo et al
EPI_ISL_467031,EPI_ISL_447052	GMERS Medical College and Hospital, Gandhinagar	Gujarat Biotechnology Research Centre	Bhavesh Modi et al
EPI_ISL_480074,EPI_ISL_480075,EPI_ISL_480076,EPI_ISL_480077,EPI_ISL_480078,EPI_ISL_480079,EPI_ISL_480080,EPI_ISL_480081,EPI_ISL_480082	Shizuoka City Institute of Environmental Sciences and Public Health	Pathogen Genomics Center, National Institute of Infectious Diseases	Tsuyoshi Sekizuka et al
EPI_ISL_455722	Servicio de Microbiologia. Hospital Clinico Universitario de Valencia	Sequencing and Bioinformatics Service and Molecular Epidemiology Research Group. FISABIO-Public Health, and SeqCOVID-Spain Consortium	Giuseppe 'Auria et al
EPI_ISL_700479	Mowbray Maternity Hospital wc MMH	NHLS/UCT	Arash Iranzadeh et al
EPI_ISL_960104	Mowbray Maternity Hospital wc MMH	National Health Laboratory Service/UCT	Arash Iranzadeh et al
EPI_ISL_693200	Hospital e Maternidade Mairipora	Instituto Adolfo Lutz, Interdiciplinary Procedures Center, Strategic Laboratory	Claudio Tavares Sacchi et al
EPI_ISL_960096	Dysselsdorp Clinic wc DDC	National Health Laboratory Service/UCT	Arash Iranzadeh et al
EPI_ISL_708737,EPI_ISL_708804,EPI_ISL_708802,EPI_ISL_708797,EPI_ISL_708800,EPI_ISL_708806,EPI_ISL_708807,EPI_ISL_708808,EPI_ISL_708801	Regional medical sciences center 6 chonburi	National Institute of Health, Department of Medical Sciences, Ministry of Public Health, Thailand	Pilailuk Okada et al
EPI_ISL_941338	INMI Lazzaro Spallanzani IRCCS	INMI Lazzaro Spallanzani IRCCS	Emanuela Giombini et al
EPI_ISL_962877,EPI_ISL_962878	National Virology Reference Laboratory	National Public Health Laboratory, National Centre for Infectious Diseases	Tze Minn Mak et al
EPI_ISL_882941	Ospedale San Camillo De Lellis Rieti	INMI Lazzaro Spallanzani IRCCS	C.E.M Gruber et al
EPI_ISL_849663,EPI_ISL_849662,EPI_ISL_528994,EPI_ISL_529023,EPI_ISL_529024,EPI_ISL_528995,EPI_ISL_528996,EPI_ISL_528997,EPI_ISL_528998,EPI_ISL_528999,EPI_ISL_529000,EPI_ISL_529001,EPI_ISL_529002,EPI_ISL_529003,EPI_ISL_529025,EPI_ISL_529004,EPI_ISL_529005,EPI_ISL_849650,EPI_ISL_849651,EPI_ISL_849652	Servizio di igiene epidemiologia e sanità pubblica (SIESP)-Chieti	Istitituto Zooprofilattico Sperimentale dell'Abruzzo e Molise "G.Caporale"	Lorusso A et al
EPI_ISL_707938,EPI_ISL_707939,EPI_ISL_708184,EPI_ISL_708185,EPI_ISL_707936,EPI_ISL_707937,EPI_ISL_708186,EPI_ISL_708188,EPI_ISL_708189,EPI_ISL_708190,EPI_ISL_708191,EPI_ISL_708195,EPI_ISL_708192,EPI_ISL_708193,EPI_ISL_708194	Pamukkale University Hospital	Pamukkale University Department of Medical Genetics	Onur TOKGUN et al. et al
EPI_ISL_860304,EPI_ISL_860309,EPI_ISL_860310,EPI_ISL_860313,EPI_ISL_860314,EPI_ISL_860316,EPI_ISL_860307,EPI_ISL_860312,EPI_ISL_860305,EPI_ISL_860306,EPI_ISL_860315,EPI_ISL_860301,EPI_ISL_860302,EPI_ISL_860311,EPI_ISL_860298,EPI_ISL_860299	Unit 17: Influenza & Other Respiratory Viruses, German National Influenza Center	Project group Epidemiology of Highly Pathogenic Microorganisms, Robert Koch-Institute	Andreas Sachse et al
EPI_ISL_872191,EPI_ISL_872192	Conjunto Hospitalar do Mandaqui de Sao Paulo	Instituto Adolfo Lutz, Interdiciplinary Procedures Center, Strategic Laboratory	Claudio Tavares Sacchi et al
EPI_ISL_888985	RS Hermina Serpong	Eijkman Institute for Molecular Biology, Ministry of Research and Technology/National Agency for Research and Innovation	Edison Johar et al
EPI_ISL_524747	Sir M P Shah Government Medical College, Jamnagar	Gujarat Biotechnology Research Centre	Afzal Ansari et al
EPI_ISL_914808	HLE - ASOCIACION HOGAR PARA ANCIANOS PRESBITERO JAFET JIMENEZ MORALES DE GRECIA	Inciensa, Instituto Costarricense de Investigación y Enseñanza en Nutrición y Salud	Francisco Duarte et al
EPI_ISL_443284,EPI_ISL_443285,EPI_ISL_443286,EPI_ISL_443287,EPI_ISL_443288	Laboratoire de Microbiologie - Bât A - CH René Dubois	National Reference Center for Viruses of Respiratory Infections, Institut Pasteur, Paris	Mélanie Albert et al
EPI_ISL_693229	Hospital 8 de Maio	Instituto Adolfo Lutz, Interdiciplinary Procedures Center, Strategic Laboratory	Claudio Tavares Sacchi et al
EPI_ISL_831436,EPI_ISL_831469,EPI_ISL_831467,EPI_ISL_831455,EPI_ISL_831444,EPI_ISL_831432,EPI_ISL_831441,EPI_ISL_831468,EPI_ISL_831452,EPI_ISL_831449,EPI_ISL_831448,EPI_ISL_831460,EPI_ISL_831453,EPI_ISL_831429,EPI_ISL_831427,EPI_ISL_831433,EPI_ISL_831439,EPI_ISL_831463,EPI_ISL_831434,EPI_ISL_831435,EPI_ISL_831445,EPI_ISL_831442,EPI_ISL_831457,EPI_ISL_831451,EPI_ISL_831462,EPI_ISL_831447,EPI_ISL_8…	Institut für Virologie, Charite - Universitätsmedizin Berlin	Robert Koch Institute, Influenza and respiratory viruses FG17 & Bioinformatics MF1, Berlin, Germany	Dr. Victor Corman et al
EPI_ISL_524721,EPI_ISL_586517,EPI_ISL_512063,EPI_ISL_514582,EPI_ISL_514600	B.J. Medical College and Civil hospital, Ahmedabad	Gujarat Biotechnology Research Centre	Raghawendra Kumar et al
EPI_ISL_436731,EPI_ISL_436732,EPI_ISL_436719,EPI_ISL_436720,EPI_ISL_436721,EPI_ISL_436722,EPI_ISL_436724	Ospedale Civile S. Liberatore di Atri	Istituto Zooprofilattico Sperimentale dell'Abruzzo e Molise "G.Caporale"	Lorusso A et al
EPI_ISL_470615,EPI_ISL_470616,EPI_ISL_470617,EPI_ISL_470618,EPI_ISL_470619,EPI_ISL_470620,EPI_ISL_470622,EPI_ISL_470623,EPI_ISL_470624,EPI_ISL_470625,EPI_ISL_470626,EPI_ISL_470627,EPI_ISL_470628,EPI_ISL_470629,EPI_ISL_470630,EPI_ISL_470631,EPI_ISL_470632,EPI_ISL_470633,EPI_ISL_470634,EPI_ISL_470635,EPI_ISL_470636,EPI_ISL_470637,EPI_ISL_470638,EPI_ISL_470639,EPI_ISL_470640,EPI_ISL_470641,EPI_ISL_4…	Laboratorio de Virologia Molecular / UFRJ	Bioinformatics Laboratory / LNCC	Alexandra Gerber et al
EPI_ISL_491476	BSL3 Lab, Pendik Veterinary Control Enstitue	Genomic Laboratory (GLAB), Istanbul Technical University	Mustafa HASOKSUZ et al
EPI_ISL_700458,EPI_ISL_700524	Hornlee Clinic wc HLC	NHLS/UCT	Houriiyah Tegally et al
EPI_ISL_418027,EPI_ISL_421453,EPI_ISL_421464,EPI_ISL_421465	CHTMAD	Instituto Nacional de Saude (INSA)	Guiomar et al et al
EPI_ISL_426428	NC State Laboratory of Public Health	Pathogen Discovery, Respiratory Viruses Branch, Division of Viral Diseases, Centers for Disease Control and Prevention	Krista Queen et al
EPI_ISL_965029	Laboratorio de Virologia HUCA	Laboratorio de Virologia HUCA	Castelló C et al
EPI_ISL_515559,EPI_ISL_515560,EPI_ISL_523969,EPI_ISL_523981,EPI_ISL_523988,EPI_ISL_515545,EPI_ISL_471551,EPI_ISL_693201,EPI_ISL_471545,EPI_ISL_515528,EPI_ISL_861639	Hospital Sao Paulo de Ensino da Unifesp	Instituto Adolfo Lutz, Interdiciplinary Procedures Center, Strategic Laboratory	Claudio Tavares Sacchi et al
EPI_ISL_878212,EPI_ISL_878226,EPI_ISL_878300,EPI_ISL_878367,EPI_ISL_878375,EPI_ISL_878390,EPI_ISL_878400,EPI_ISL_878401,EPI_ISL_878404,EPI_ISL_878408,EPI_ISL_878437,EPI_ISL_879950,EPI_ISL_879977,EPI_ISL_483158,EPI_ISL_483159,EPI_ISL_483160,EPI_ISL_483161,EPI_ISL_483162,EPI_ISL_483163,EPI_ISL_483164,EPI_ISL_483531,EPI_ISL_483532,EPI_ISL_483533,EPI_ISL_483534,EPI_ISL_483535,EPI_ISL_483536,EPI_ISL_4…	San Diego County Public Health Laboratory	Andersen lab at Scripps Research	SEARCH Alliance San Diego with Tracy Basler et al
EPI_ISL_636050,EPI_ISL_636051,EPI_ISL_636052,EPI_ISL_636053,EPI_ISL_636054,EPI_ISL_636055,EPI_ISL_636056,EPI_ISL_636057,EPI_ISL_636058,EPI_ISL_636059,EPI_ISL_636060,EPI_ISL_636061,EPI_ISL_636062,EPI_ISL_636063,EPI_ISL_636064,EPI_ISL_636065,EPI_ISL_636066,EPI_ISL_636067,EPI_ISL_636068,EPI_ISL_636069,EPI_ISL_636070,EPI_ISL_636071,EPI_ISL_636072,EPI_ISL_636073,EPI_ISL_636074,EPI_ISL_636075,EPI_ISL_6…	San Diego County Public Health Laboratory	Andersen lab at Scripps Research	SEARCH Alliance San Diego with Tracy Basler et al
EPI_ISL_755289,EPI_ISL_755290,EPI_ISL_755117,EPI_ISL_755291,EPI_ISL_755292,EPI_ISL_755293,EPI_ISL_755294,EPI_ISL_755295,EPI_ISL_755296,EPI_ISL_755297,EPI_ISL_755298,EPI_ISL_755115,EPI_ISL_755299,EPI_ISL_755300,EPI_ISL_467950,EPI_ISL_467951,EPI_ISL_467952,EPI_ISL_467953,EPI_ISL_467954,EPI_ISL_467955,EPI_ISL_467956,EPI_ISL_467957,EPI_ISL_467958,EPI_ISL_467959,EPI_ISL_467960,EPI_ISL_467961,EPI_ISL_4…	San Diego County Public Health Laboratory	Andersen lab at Scripps Research	SEARCH Alliance San Diego with Tracy Basler et al
EPI_ISL_434539	Area de Salud Orotina	Inciensa, Instituto Costarricense de Investigación y Enseñanza en Nutrición y Salud	Francisco Duarte et al
EPI_ISL_984290,EPI_ISL_984292	Algemeen Medisch Laboratorium	UAntwerp, Laboratory of Medical Microbiology	Basil Britto Xavier et al
EPI_ISL_538523,EPI_ISL_538522	Infectious Diseases, North Carolina State Laboratory of Public Health COVID-19 Response Team	North Carolina State Laboratory of Public Health	Chase et al
EPI_ISL_745260	CHUM-Site Glen-LAB Microbiologie	Laboratoire de santé publique du Québec	Sandrine Moreira et al
EPI_ISL_768537,EPI_ISL_768531,EPI_ISL_768533,EPI_ISL_768534,EPI_ISL_768543,EPI_ISL_768540,EPI_ISL_768530,EPI_ISL_768617,EPI_ISL_768615,EPI_ISL_768532,EPI_ISL_768535,EPI_ISL_768542,EPI_ISL_768541,EPI_ISL_768536,EPI_ISL_768544,EPI_ISL_768539,EPI_ISL_768538	Regional Medical Sciences Center 5 Samut Songkhram	National Institute of Health, Department of Medical Sciences, Ministry of Public Health, Thailand	Pilailuk Okada et al
EPI_ISL_586549	CCC,Veraval	Gujarat Biotechnology Research Centre	Jignesh Parmar et al
EPI_ISL_469287,EPI_ISL_469288,EPI_ISL_469289,EPI_ISL_469290,EPI_ISL_469291,EPI_ISL_469292,EPI_ISL_469293,EPI_ISL_469294,EPI_ISL_469295,EPI_ISL_469296	Keio University Hospital	Keio University Hospital	Kenjiro Kosaki et al
EPI_ISL_475039,EPI_ISL_476882,EPI_ISL_500948	Department of MicroBiology, Government Medical College, Surat	Gujarat Biotechnology Research Centre	Zuber Saiyed et al
EPI_ISL_487098,EPI_ISL_487108,EPI_ISL_487105,EPI_ISL_487102,EPI_ISL_487096,EPI_ISL_455362,EPI_ISL_487107,EPI_ISL_487103,EPI_ISL_455412,EPI_ISL_487106,EPI_ISL_487112,EPI_ISL_487111,EPI_ISL_455413,EPI_ISL_455415,EPI_ISL_455418,EPI_ISL_455419,EPI_ISL_455423,EPI_ISL_455424,EPI_ISL_455427,EPI_ISL_487110,EPI_ISL_487109,EPI_ISL_455429,EPI_ISL_455431,EPI_ISL_487099,EPI_ISL_487104,EPI_ISL_487091,EPI_ISL_4…	Nigeria Centre for Disease Control (NCDC)	African Centre of Excellence for Genomics of Infectious Diseases (ACEGID), Redeemer's University, Ede, Osun State, Nigeria	Oluniyi P.E. et al
EPI_ISL_416316,EPI_ISL_416317,EPI_ISL_416318,EPI_ISL_416319,EPI_ISL_416320,EPI_ISL_416321,EPI_ISL_416322,EPI_ISL_416323,EPI_ISL_416324,EPI_ISL_416325,EPI_ISL_416326,EPI_ISL_416327,EPI_ISL_416328,EPI_ISL_416329,EPI_ISL_416330,EPI_ISL_416331,EPI_ISL_416332,EPI_ISL_416333,EPI_ISL_416334,EPI_ISL_416335,EPI_ISL_416336,EPI_ISL_416337,EPI_ISL_416338,EPI_ISL_416339,EPI_ISL_416340,EPI_ISL_416341,EPI_ISL_4…	Shanghai Public Health Clinical Center, Shanghai Medical College, Fudan University	National Research Center for Translational Medicine (Shanghai), Ruijin Hospital affiliated to Shanghai Jiao Tong University School of Medicine & Shanghai Public Health Clinical Center	Shengyue Wang et al
EPI_ISL_622963,EPI_ISL_622964,EPI_ISL_622955,EPI_ISL_622965,EPI_ISL_622962,EPI_ISL_623073,EPI_ISL_622943,EPI_ISL_622951,EPI_ISL_622946,EPI_ISL_622961,EPI_ISL_622966,EPI_ISL_622948,EPI_ISL_622959,EPI_ISL_622952,EPI_ISL_622960,EPI_ISL_622947,EPI_ISL_622953,EPI_ISL_622957,EPI_ISL_622968,EPI_ISL_622956,EPI_ISL_622967,EPI_ISL_622969,EPI_ISL_622949,EPI_ISL_622950	Lancet Laboratories	National Institute for Communicable Diseases of the National Health Laboratory Service	Allam M et al
EPI_ISL_722851,EPI_ISL_722859,EPI_ISL_722852,EPI_ISL_722898,EPI_ISL_722860,EPI_ISL_649785,EPI_ISL_722861,EPI_ISL_722862,EPI_ISL_722863,EPI_ISL_722864,EPI_ISL_722895,EPI_ISL_722865,EPI_ISL_722866,EPI_ISL_649938,EPI_ISL_722853,EPI_ISL_649939,EPI_ISL_722867,EPI_ISL_722900,EPI_ISL_722868,EPI_ISL_722854,EPI_ISL_722869,EPI_ISL_722870,EPI_ISL_722871,EPI_ISL_653823,EPI_ISL_653763,EPI_ISL_653764,EPI_ISL_6…	I.R.C.C.S. "S. De Bellis" - Ente Ospedaliero	Istituto Zooprofilattico Sperimentale della Puglia e della Basilicata	Parisi A. et al
EPI_ISL_903981,EPI_ISL_903983,EPI_ISL_903985,EPI_ISL_903990,EPI_ISL_903992,EPI_ISL_903994,EPI_ISL_903996,EPI_ISL_904001,EPI_ISL_959642,EPI_ISL_959645,EPI_ISL_959646,EPI_ISL_959639,EPI_ISL_959641,EPI_ISL_959630,EPI_ISL_959626,EPI_ISL_959634,EPI_ISL_959624,EPI_ISL_959622,EPI_ISL_959621,EPI_ISL_959608,EPI_ISL_959610,EPI_ISL_959612,EPI_ISL_959614,EPI_ISL_959618,EPI_ISL_577735,EPI_ISL_577737,EPI_ISL_5…	Institute of Virology, Biomedical Research Center of the Slovak Academy of Sciences, Bratislava	Faculty of Natural Sciences, Comenius University, Bratislava	Kristína Boršová et al
EPI_ISL_467040	Government Medical College, Vadodara	Gujarat Biotechnology Research Centre	Neena Doshi et al
EPI_ISL_480178,EPI_ISL_480179	Hiroshima City Institute of Public Health	Pathogen Genomics Center, National Institute of Infectious Diseases	Tsuyoshi Sekizuka et al
EPI_ISL_970179	Hospital San Agustin, Avilés	Laboratorio de Virología HUCA	Castelló C et al
EPI_ISL_882667	Hospital de Clinicas Caieiras	Instituto Adolfo Lutz, Interdiciplinary Procedures Center, Strategic Laboratory	Claudio Tavares Sacchi et al
EPI_ISL_407893,EPI_ISL_417030,EPI_ISL_412975,EPI_ISL_413213,EPI_ISL_413214	Centre for Infectious Diseases and Microbiology Laboratory Services	NSW Health Pathology - Institute of Clinical Pathology and Medical Research; Westmead Hospital; University of Sydney	Eden J-S et al
EPI_ISL_745186	Wallacedene Clinic wc WAL	National Health Laboratory Service (NHLS), Tygerberg	Susan Engelbrecht et al
EPI_ISL_634864,EPI_ISL_634865	HealthPartners Central Lab	Minnesota Department of Health, Public Health Laboratory	Matt Plumb et al
EPI_ISL_904017	NCSLPH	NCSLPH	Kitty Chase et al
EPI_ISL_871977,EPI_ISL_871976	Hospital Universitario Lozano Bielsa	Instituto de Salud Carlos III	Iglesias-Caballero et al
EPI_ISL_648207,EPI_ISL_648208	Orebro	The Public Health Agency of Sweden	Anna-Malin Linde et al
EPI_ISL_876743,EPI_ISL_794756,EPI_ISL_794757,EPI_ISL_794758	Presidio di Brindisi Di Summa - Perrino	Istituto Zooprofilattico Sperimentale della Puglia e della Basilicata	Parisi A. et al
EPI_ISL_582031,EPI_ISL_582032,EPI_ISL_462480,EPI_ISL_485399	Institute of Human Genetics, Polish Academy of Sciences	Institute of Human Genetics, Polish Academy of Sciences	Szymon Hryhorowicz et al
EPI_ISL_825054	GMERS Medical College and Hospital, Gotri, Vadodara	Gujarat Biotechnology Research Centre	Kalpesh Mistry et al
EPI_ISL_450819	Hovas Askim Familjelakare och BVC	The Public Health Agency of Sweden	Anna Wendel et al
EPI_ISL_445252	PONTIFICIA U. CATOLICA FAC. MEDICINA	Instituto de Salud Publica de Chile	Andrés E Castillo et al
EPI_ISL_420126,EPI_ISL_447483,EPI_ISL_447497,EPI_ISL_447511,EPI_ISL_447524	Servicio de Microbiologia. Hospital Clinico Universitario de Valencia	Sequencing and Bioinformatics Service and Molecular Epidemiology Research Group. FISABIO-Public Health	Llúcia Martínez-Priego et al
EPI_ISL_443303	Résidence Les Marines	National Reference Center for Viruses of Respiratory Infections, Institut Pasteur, Paris	Mélanie Albert et al
EPI_ISL_582022,EPI_ISL_582023	Pathlab Lakes	Institute of Environmental Science and Research (ESR)	Xiaoyun Ren et al
EPI_ISL_591533,EPI_ISL_591534,EPI_ISL_591531,EPI_ISL_591532	Laboratorio de Infectologia y virologia molecular	Center for Mathematical Modeling and Center for Genome Regulation. Santiago, Chile	Valiente F et al
EPI_ISL_911532,EPI_ISL_911533,EPI_ISL_911534,EPI_ISL_911535,EPI_ISL_911536,EPI_ISL_911539,EPI_ISL_911540,EPI_ISL_911541,EPI_ISL_911543,EPI_ISL_911546,EPI_ISL_911547	CSIR-IGIB	CSIR-IGIB	Rajesh Pandey et al
EPI_ISL_968069,EPI_ISL_968070,EPI_ISL_968071,EPI_ISL_968072,EPI_ISL_968073,EPI_ISL_968074,EPI_ISL_968075,EPI_ISL_968076,EPI_ISL_968077,EPI_ISL_968078,EPI_ISL_968079	Monterey County Public Health Laboratory	Monterey County Public Health Laboratory	Monterey County Public Health Laboratory et al
EPI_ISL_421507,EPI_ISL_421508	Le Château de Seine-Port	National Reference Center for Viruses of Respiratory Infections, Institut Pasteur, Paris	Mélanie Albert et al
EPI_ISL_518826,EPI_ISL_518827,EPI_ISL_518828,EPI_ISL_518829,EPI_ISL_518830,EPI_ISL_518831,EPI_ISL_518832	Oman-National Influenza Center	Biotechnology & OMICs Laboratory, Natural & Medical Sciences Research Center, University of Nizwa	Sajjad Asaf et al
EPI_ISL_756293,EPI_ISL_756294	Center for Biotechnology and Cell Therapy, São Rafael Hospital, Salvador, Brazil	Center for Biotechnology and Cell Therapy, São Rafael Hospital, Salvador, Brazil	Carolina Kymie Vasques Nonaka et al
EPI_ISL_419296,EPI_ISL_479823	Kochi Prefectural Institute of Public Health	Pathogen Genomics Center, National Institute of Infectious Diseases	Tsuyoshi Sekizuka et al
EPI_ISL_485401	Communicable Disease Laboratory, Public Health Directorate	Communicable Disease Laboratory, Public Health Directorate	Zaed et al
EPI_ISL_603030,EPI_ISL_574591,EPI_ISL_574592,EPI_ISL_693218	Hospital Domingos Leonardo Ceravolo Presidente Prudente	Instituto Adolfo Lutz, Interdiciplinary Procedures Center, Strategic Laboratory	Claudio Tavares Sacchi et al
EPI_ISL_413221,EPI_ISL_414024,EPI_ISL_414025,EPI_ISL_414026,EPI_ISL_414027	West of Scotland Specialist Virology Centre, NHSGGC	MRC-University of Glasgow Centre for Virus Research	Emma Thomson et al
EPI_ISL_415154	KU Leuven, Clincal and Epidemiological Virology	KU Leuven, Clincal and Epidemiological Virology	Bert Vanmechelen et al
EPI_ISL_454635	County Of San Luis Obispo Public Health Laboratory	Chan-Zuckerberg Biohub	CZB Cliahub Consortium et al
EPI_ISL_906047,EPI_ISL_906048	MD Laboratories	Los Angeles County Public Health Laboratory	P. Hemarajata et al. et al
EPI_ISL_766938	Nevada State Health Lab	Nevada State Health Lab	Andrew Gorzalski et al
EPI_ISL_418260,EPI_ISL_418261,EPI_ISL_420563,EPI_ISL_429228,EPI_ISL_429231,EPI_ISL_429232,EPI_ISL_429233,EPI_ISL_429234,EPI_ISL_429235	Ospedale Civile Giuseppe Mazzini	Istituto Zooprofilattico Sperimentale dell'Abruzzo e Molise "G. Caporale"	Lorusso A et al
EPI_ISL_447310,EPI_ISL_447309,EPI_ISL_447308,EPI_ISL_447307,EPI_ISL_447306,EPI_ISL_447305,EPI_ISL_447304,EPI_ISL_447303,EPI_ISL_447302,EPI_ISL_447301,EPI_ISL_447300,EPI_ISL_447299,EPI_ISL_447298,EPI_ISL_447297,EPI_ISL_447296,EPI_ISL_447295,EPI_ISL_447294,EPI_ISL_447293,EPI_ISL_447292,EPI_ISL_447291,EPI_ISL_447290,EPI_ISL_447289,EPI_ISL_447288,EPI_ISL_447287,EPI_ISL_447286,EPI_ISL_447285,EPI_ISL_4…	Microbiology Division, Barzilai University Medical Center	Stern Lab	Stern Lab et al
EPI_ISL_574790,EPI_ISL_574791,EPI_ISL_574792,EPI_ISL_574793,EPI_ISL_574794,EPI_ISL_574795,EPI_ISL_574796,EPI_ISL_574797,EPI_ISL_574798,EPI_ISL_574799,EPI_ISL_574800,EPI_ISL_574801,EPI_ISL_574802,EPI_ISL_574803,EPI_ISL_574804,EPI_ISL_574805,EPI_ISL_574806,EPI_ISL_574807,EPI_ISL_574808,EPI_ISL_574809,EPI_ISL_574810,EPI_ISL_574811,EPI_ISL_574812,EPI_ISL_574813,EPI_ISL_574814,EPI_ISL_574815,EPI_ISL_5…	Institute for Infectious Diseases, University of Bern	Institute for Infectious Diseases, University of Bern	Michel C Koch et al
EPI_ISL_745200	Nizams Institute of Medical Sciences	CSIR-Centre for Cellular and Molecular Biology	Dr.V.Sudha Rani et al
EPI_ISL_502779,EPI_ISL_502875	LACEN/PE	LABBE, Federal University of Pernambuco	WILSON JOSE DA SILVA JUNIOR et al
EPI_ISL_955142,EPI_ISL_955144,EPI_ISL_955146,EPI_ISL_955148,EPI_ISL_955150,EPI_ISL_955151,EPI_ISL_955155,EPI_ISL_955156,EPI_ISL_955170	University of Sarajevo, Veterinary Faculty, Laboratory for Molecular Diagnostic and Research Laboratory	University of Sarajevo, Veterinary Faculty, Laboratory for Molecular Diagnostic and Research Laboratory	Goletić T. et al
EPI_ISL_693203	Hospital Municipal Doutor Arthur Ribeiro de Saboya	Instituto Adolfo Lutz, Interdiciplinary Procedures Center, Strategic Laboratory	Claudio Tavares Sacchi et al
EPI_ISL_434563,EPI_ISL_434564,EPI_ISL_434565,EPI_ISL_434566,EPI_ISL_434567,EPI_ISL_434568,EPI_ISL_434569	unknown	Microbiology, The University of Hong Kong	To et al
EPI_ISL_435119	Mohammed Bin Rashid University of Medicine and Health Sciences	Al Jalila Children’s Hospital	Ahmad Abou Tayoun et al
EPI_ISL_422425	Zhejiang Provincial Center for Disease Control and Prevention	Zhejiang Provincial Center for Disease Control and Prevention	Yanjun Zhang et al
EPI_ISL_419654,EPI_ISL_419655,EPI_ISL_419656,EPI_ISL_419657,EPI_ISL_419658,EPI_ISL_419659,EPI_ISL_419660,EPI_ISL_419661,EPI_ISL_419662,EPI_ISL_419663,EPI_ISL_419664,EPI_ISL_419665,EPI_ISL_419666,EPI_ISL_419667,EPI_ISL_419668,EPI_ISL_419669,EPI_ISL_419670,EPI_ISL_419671,EPI_ISL_419672,EPI_ISL_419673,EPI_ISL_419674,EPI_ISL_437993,EPI_ISL_437994,EPI_ISL_437995,EPI_ISL_437996,EPI_ISL_437997,EPI_ISL_4…	Center for Virology, Medical University of Vienna	Bergthaler laboratory, CeMM Research Center for Molecular Medicine of the Austrian Academy of Sciences	Alexandra Popa et al
EPI_ISL_700470,EPI_ISL_700427,EPI_ISL_700420	D'Almeida Clinic wc DAL	NHLS/UCT	Houriiyah Tegally et al
EPI_ISL_483867	Department of Microbiology, Government Medical College, Surat	Gujarat Biotechnology Research Centre	Nidhi Patel et al
EPI_ISL_426633,EPI_ISL_426634,EPI_ISL_426898,EPI_ISL_426899,EPI_ISL_426900,EPI_ISL_426901,EPI_ISL_426902,EPI_ISL_426903,EPI_ISL_426904,EPI_ISL_426635,EPI_ISL_426636	Royal Darwin Hospital Pathology	Microbiological Diagnostic Unit Public Health Laboratory and Victorian Infectious Diseases Reference Laboratory, Doherty Institute	Meumann et al
EPI_ISL_903891,EPI_ISL_903879,EPI_ISL_903910,EPI_ISL_903766,EPI_ISL_903617,EPI_ISL_903598,EPI_ISL_903841,EPI_ISL_903938	UT-Unified State Labs: Public Health Utah DOH	Genomics and Discovery, Respiratory Viruses Branch, Division of Viral Diseases, Centers for Disease Control and Prevention	Krista Queen et al
EPI_ISL_691682,EPI_ISL_691683,EPI_ISL_954810,EPI_ISL_954805,EPI_ISL_954781,EPI_ISL_965959,EPI_ISL_965946	Hospital General Universitario de Ciudad Real	Instituto de Salud Carlos III	Iglesias-Caballero et al
EPI_ISL_418436	University Hospital Basel, Clinical Virology	University Hospital Basel, Clinical Virology	Hirsch et al
EPI_ISL_831945,EPI_ISL_788999,EPI_ISL_831946	Klinisk mikrobiologi, virus F68	The Public Health Agency of Sweden	Department of Microbiology et al
EPI_ISL_536265	Hôpital de Chandler	Laboratoire de santé publique du Québec	Sandrine Moreira et al
EPI_ISL_804980,EPI_ISL_896422,EPI_ISL_896423,EPI_ISL_896424,EPI_ISL_896425,EPI_ISL_896383,EPI_ISL_896426,EPI_ISL_896427,EPI_ISL_896428,EPI_ISL_896429,EPI_ISL_896384,EPI_ISL_896430,EPI_ISL_896431,EPI_ISL_896382,EPI_ISL_896391,EPI_ISL_896432,EPI_ISL_896433,EPI_ISL_896434,EPI_ISL_896435,EPI_ISL_896386,EPI_ISL_896436,EPI_ISL_896392,EPI_ISL_896437,EPI_ISL_896393,EPI_ISL_896438,EPI_ISL_896394,EPI_ISL_8…	Columbia University Irving Medical Center	Wadsworth Center, New York State Department of Health	Kirsten St. George et al
EPI_ISL_902917,EPI_ISL_902918,EPI_ISL_902919,EPI_ISL_902924,EPI_ISL_902922	Tanjungpura University Hospital	Tanjungpura University Hospital	Andriani et al
EPI_ISL_489167,EPI_ISL_489257,EPI_ISL_489233,EPI_ISL_489268,EPI_ISL_489330,EPI_ISL_489373,EPI_ISL_489181,EPI_ISL_489355,EPI_ISL_489340,EPI_ISL_489222,EPI_ISL_489322,EPI_ISL_489263,EPI_ISL_489194,EPI_ISL_489343,EPI_ISL_489329,EPI_ISL_489323,EPI_ISL_489364,EPI_ISL_489264,EPI_ISL_469847,EPI_ISL_482149,EPI_ISL_482154,EPI_ISL_469886,EPI_ISL_482147,EPI_ISL_469888,EPI_ISL_469866,EPI_ISL_482146,EPI_ISL_4…	Regional Virus Laboratory, Belfast Health and Social Care Trust	Wellcome Sanger Institute for the COVID-19 Genomics UK (COG-UK) consortium	Conall McCaughey et al
EPI_ISL_883293	SIESP CHIETI-DRIVE IN LANCIANO	Istituto Zooprofilattico Sperimentale dell’Abruzzo e Molise “G. Caporale”	Lorusso A et al
EPI_ISL_450413	Center for Diagnostics, Institute of Medical Microbiology, Virology and Hygiene	University Medical Center Hamburg-Eppendorf	Huang et al
EPI_ISL_770009,EPI_ISL_770010	Area De Salud Escazu (Coopesana)	Inciensa, Instituto Costarricense de Investigación y Enseñanza en Nutrición y Salud	Francisco Duarte et al
EPI_ISL_735408	COVID 19 Centro de Combate ao Coronavirus CCC Jandira	Instituto Adolfo Lutz, Interdiciplinary Procedures Center, Strategic Laboratory	Claudio Tavares Sacchi et al
EPI_ISL_590691	Government Hospital,Veraval	Gujarat Biotechnology Research Centre	Janvi Raval et al
EPI_ISL_759968	RSI Darus Syifa'	Institute of Tropical Disease, Universitas Airlangga	Maria I Lusida et al
EPI_ISL_413459	Department of Pathology, Toshima Hospital	Pathogen Genomics Center, National Institute of Infectious Diseases	Tsuyoshi Sekizuka et al
EPI_ISL_872680,EPI_ISL_872681,EPI_ISL_872682,EPI_ISL_872684,EPI_ISL_872689,EPI_ISL_872690,EPI_ISL_872691,EPI_ISL_872692,EPI_ISL_872694,EPI_ISL_872697,EPI_ISL_872698,EPI_ISL_872700,EPI_ISL_872702,EPI_ISL_872704,EPI_ISL_872708,EPI_ISL_872709,EPI_ISL_872712,EPI_ISL_872713,EPI_ISL_872715,EPI_ISL_872716,EPI_ISL_872717,EPI_ISL_872718,EPI_ISL_872719,EPI_ISL_872721,EPI_ISL_872723,EPI_ISL_872725,EPI_ISL_8…	Rhode Island Department of Health	Infectious Disease Program, Broad Institute of Harvard and MIT	Lemieux et al
EPI_ISL_794659,EPI_ISL_794660	HOSPITAL UNIVERSITARIO SAN IGNACIO	Instituto Nacional de Salud - Dirección de Investigación en Salud Pública	Katherine Laiton-Donato et al
EPI_ISL_529146	Goethe University Hospital Frankfurt, Institute for Medical Virology	Goethe University Hospital Frankfurt, Institute for Medical Virology	Grabmair et al
EPI_ISL_956298	Laboratorio de salud publica del Valle del Cauca	Instituto Nacional de Salud- Dirección de Investigación en Salud Pública	Katherine Laiton-Donato et al
EPI_ISL_481264,EPI_ISL_481253,EPI_ISL_481262,EPI_ISL_481256	Robert Koch Institute, National Reference center for Influenza, Berlin, Germany	Robert Koch Institute, Bioinformatics MF1, Berlin, Germany	Marianne Wedde et al
EPI_ISL_623106,EPI_ISL_623107,EPI_ISL_623108,EPI_ISL_623110,EPI_ISL_623112,EPI_ISL_623113,EPI_ISL_623114,EPI_ISL_623116,EPI_ISL_623117,EPI_ISL_623118,EPI_ISL_623119,EPI_ISL_623120,EPI_ISL_623121,EPI_ISL_623122,EPI_ISL_623124,EPI_ISL_623125,EPI_ISL_623126,EPI_ISL_623127,EPI_ISL_623128,EPI_ISL_623129,EPI_ISL_623130,EPI_ISL_623131,EPI_ISL_623132,EPI_ISL_623133,EPI_ISL_623134,EPI_ISL_623136,EPI_ISL_6…	Laboratorio de Virologia Molecular / UFRJ	Bioinformatics Laboratory / LNCC	Carolina M Voloch et al
EPI_ISL_940612	Hospital de Campanha para Enfrentamento do Coronavirus - Goiania	Instituto Adolfo Lutz, Interdiciplinary Procedures Center, Strategic Laboratory	Claudio Tavares Sacchi et al
EPI_ISL_539886	Barnakuten	The Public Health Agency of Sweden	Anna-Malin Linde et al
EPI_ISL_451530,EPI_ISL_451531,EPI_ISL_451533,EPI_ISL_451536,EPI_ISL_451542,EPI_ISL_451543,EPI_ISL_451544,EPI_ISL_451549,EPI_ISL_451559,EPI_ISL_451560,EPI_ISL_451561,EPI_ISL_451562,EPI_ISL_451563,EPI_ISL_451564,EPI_ISL_451565,EPI_ISL_451578,EPI_ISL_451581,EPI_ISL_699647,EPI_ISL_451603,EPI_ISL_451608,EPI_ISL_451642,EPI_ISL_451643,EPI_ISL_455037,EPI_ISL_455071,EPI_ISL_455094	Pathology Sydney South West - NSW Health Pathology	NSW Health Pathology - Institute of Clinical Pathology and Medical Research; Westmead Hospital; University of Sydney	CIDM-PH et al. et al
EPI_ISL_775346,EPI_ISL_775347	Department of medical microbiology, section Aalesund, Aalesund Hospital	Norwegian Institute of Public Health, Department of Virology	Kathrine Stene-Johansen et al
EPI_ISL_547573,EPI_ISL_583493	Vigilância em Saúde de Cajamar	Instituto Adolfo Lutz, Interdiciplinary Procedures Center, Strategic Laboratory	Claudio Tavares Sacchi et al
EPI_ISL_455333,EPI_ISL_913495,EPI_ISL_913024	Complejo Hospitalario Universitario de Santiago	Instituto de Salud Carlos III	Iglesias-Caballero et al
EPI_ISL_418243,EPI_ISL_418244	HOSPITAL UNIVERSITARIO VIRGEN DE LAS NIEVES	Instituto de Salud Carlos III	Iglesias-Caballero et al
EPI_ISL_803881,EPI_ISL_803880,EPI_ISL_803882,EPI_ISL_803883,EPI_ISL_803884,EPI_ISL_803885,EPI_ISL_803886,EPI_ISL_803887,EPI_ISL_803888,EPI_ISL_803891,EPI_ISL_803892,EPI_ISL_803893,EPI_ISL_803895	Department of Medical Biotechnologies, University of Siena	Laboratory of Infectious Diseases, Department of Biomedical and Clinical Sciences L. Sacco, University of Milan	Ilaria Vicenti et al
EPI_ISL_767629,EPI_ISL_767659,EPI_ISL_767660,EPI_ISL_767661,EPI_ISL_767662,EPI_ISL_767663,EPI_ISL_767664,EPI_ISL_767593,EPI_ISL_767588,EPI_ISL_767592,EPI_ISL_767583,EPI_ISL_767591,EPI_ISL_767630,EPI_ISL_767631,EPI_ISL_767632,EPI_ISL_767633,EPI_ISL_767634,EPI_ISL_767596,EPI_ISL_767635,EPI_ISL_767636,EPI_ISL_767637,EPI_ISL_767638,EPI_ISL_767639,EPI_ISL_767640,EPI_ISL_767641,EPI_ISL_767642,EPI_ISL_7…	MEMORIAL SLOAN KETTERING CANCER CENTER	Wadsworth Center, New York State Department.of Health	Kirsten St. George et al
EPI_ISL_410301	National Influenza Centre, National Public Health Laboratory, Kathmandu, Nepal	The University of Hong Kong	Ranjit Sah et al
EPI_ISL_475718,EPI_ISL_475719,EPI_ISL_475717,EPI_ISL_475720,EPI_ISL_475721	Microbiology, University Hospital Donostia	Microbiology, University Hospital Donostia	Cilla et al
EPI_ISL_436198,EPI_ISL_436206,EPI_ISL_436214,EPI_ISL_436222,EPI_ISL_436229,EPI_ISL_436273,EPI_ISL_420112,EPI_ISL_436386,EPI_ISL_436393,EPI_ISL_425182,EPI_ISL_425196,EPI_ISL_425216	Servicio de Microbiología. Consorcio Hospital General Universitario de Valencia	Sequencing and Bioinformatics Service and Molecular Epidemiology Research Group. FISABIO-Public Health	Lidia Ruiz Roldan et al
EPI_ISL_511945,EPI_ISL_511946,EPI_ISL_511947,EPI_ISL_511948,EPI_ISL_511949,EPI_ISL_511950,EPI_ISL_511951,EPI_ISL_511952,EPI_ISL_518031	Indian Institute of Science	National Institute of Biomedical Genomics - DBT's PAN-INDIA 1000 SARS--CoV-2 RNA Genome Sequencing Consortium	Arindam Maitra et al
EPI_ISL_754847,EPI_ISL_754848	Korian Villa d'Azon	National Reference Center for Viruses of Respiratory Infections, Institut Pasteur, Paris	Marion Barbet et al
EPI_ISL_418263,EPI_ISL_418264,EPI_ISL_418265	Laboratory of Microbiology, Department of Medicine, National and Kapodistrian University of Athens, Greece	Laboratory of Biology, Department of Medicine, Democritus University of Thrace, Greece	Maria Bampali et al
EPI_ISL_476873,EPI_ISL_495070	Department of MicroBiology, Government Medical College, Surat	Gujarat Biotechnology Research Centre	Apurvasinh Puvar et al
EPI_ISL_632999,EPI_ISL_633000,EPI_ISL_633001,EPI_ISL_633002,EPI_ISL_671675,EPI_ISL_633003,EPI_ISL_633004,EPI_ISL_633005,EPI_ISL_633006,EPI_ISL_633007,EPI_ISL_633008,EPI_ISL_633060,EPI_ISL_633061,EPI_ISL_633062,EPI_ISL_633064,EPI_ISL_671692,EPI_ISL_671698,EPI_ISL_671706,EPI_ISL_671707,EPI_ISL_671712,EPI_ISL_671714,EPI_ISL_671723,EPI_ISL_671724,EPI_ISL_671730,EPI_ISL_671735,EPI_ISL_671739,EPI_ISL_6…	DOHMH Jamaica	New York City Public Health Laboratory	Jade Wang et al
EPI_ISL_418024	CHUA - Faro	Instituto Nacional de Saude (INSA)	Guiomar et al et al
EPI_ISL_700584,EPI_ISL_700595,EPI_ISL_700559,EPI_ISL_700598,EPI_ISL_700574,EPI_ISL_700545,EPI_ISL_640082	Heideveld Emergency Centre	NHLS/UCT	Arash Iranzadeh et al
EPI_ISL_634827,EPI_ISL_700358	Laboratoire de virologie, CHU de Grenoble - CS 10217 - 38043 Grenoble cedex 19	CNR Virus des Infections Respiratoires - France SUD	Antonin Bal et al
EPI_ISL_427288,EPI_ISL_427290,EPI_ISL_427291,EPI_ISL_421660	The Ohio State University	The Ohio State University-James Molecular Lab at Polaris	Huolin Tu et al
EPI_ISL_900527,EPI_ISL_913666	Cerballiance	CNR Virus des Infections Respiratoires - France SUD	Antonin Bal et al
EPI_ISL_832815,EPI_ISL_832816,EPI_ISL_832822,EPI_ISL_833231,EPI_ISL_833242	SIESP CHIETI - DRIVE IN LANCIANO	Istitituto Zooprofilattico Sperimentale dell'Abruzzo e Molise "G.Caporale"	Lorusso A et al
EPI_ISL_700349,EPI_ISL_634818	Laboratoire de virologie, CHU de Grenoble - CS 10217 - 38043 Grenoble cedex 10	CNR Virus des Infections Respiratoires - France SUD	Antonin Bal et al
EPI_ISL_452792,EPI_ISL_452793,EPI_ISL_452794,EPI_ISL_452795,EPI_ISL_452787,EPI_ISL_452788,EPI_ISL_452789,EPI_ISL_452790,EPI_ISL_452791	ICAR-National Institute of High Security Animal Diseases	ICAR-National Institute of High Security Animal Diseases	Anamika Mishra et al
EPI_ISL_539122,EPI_ISL_539063,EPI_ISL_539039,EPI_ISL_539052,EPI_ISL_539029,EPI_ISL_539154,EPI_ISL_538999,EPI_ISL_538992,EPI_ISL_539138,EPI_ISL_539092,EPI_ISL_539002,EPI_ISL_539003,EPI_ISL_538990,EPI_ISL_539069,EPI_ISL_539000,EPI_ISL_538989,EPI_ISL_539005,EPI_ISL_538988,EPI_ISL_538986,EPI_ISL_539067,EPI_ISL_539004,EPI_ISL_539001,EPI_ISL_539055,EPI_ISL_538996,EPI_ISL_538993,EPI_ISL_538998,EPI_ISL_5…	Leeds Teaching Hospitals NHS Trust and Public Health England, National Infection Service (Leeds laboratory)	Wellcome Sanger Institute for the COVID-19 Genomics UK (COG-UK) consortium	Louissa Macfarlane-Smith et al
EPI_ISL_755303,EPI_ISL_755302	Laboratorio de Bioingeniería, Instituto de Ciencias de la Ingeniería, Universidad de O´Higgins	Center for Mathematical Modeling and Center for Genome Regulation. Santiago, Chile	M. Latorre et al
EPI_ISL_486649,EPI_ISL_486653,EPI_ISL_486657,EPI_ISL_486660,EPI_ISL_486664	Microbiology, Virology and Biemergency Laboratory-ASST FBF Sacco	Microbiology, Virology and Biemergency Laboratory-ASST FBF Sacco	Rimoldi SG et al
EPI_ISL_460092,EPI_ISL_460085,EPI_ISL_460087	Molecular Virology Unit, Fondazione IRCCS Policlinico San Matteo , Pavia	Laboratory of Virology, INMI Lazzaro Spallanzani IRCCS	Cesare E.M. Gruber et al
EPI_ISL_476853,EPI_ISL_476854,EPI_ISL_476888,EPI_ISL_476889,EPI_ISL_476890,EPI_ISL_476887,EPI_ISL_476891,EPI_ISL_476892,EPI_ISL_476893,EPI_ISL_476894,EPI_ISL_476896,EPI_ISL_476023,EPI_ISL_476849,EPI_ISL_476846,EPI_ISL_476850,EPI_ISL_476852,EPI_ISL_476883,EPI_ISL_476884,EPI_ISL_476844,EPI_ISL_476885,EPI_ISL_476886,EPI_ISL_476895,EPI_ISL_476842,EPI_ISL_476840,EPI_ISL_476848	Defence Research & Development Establishment (DRDE)	Defence Research & Development Establishment (DRDE)	Shashi Sharma et al
EPI_ISL_541681,EPI_ISL_541682,EPI_ISL_541683,EPI_ISL_541684,EPI_ISL_541685,EPI_ISL_541687,EPI_ISL_541688,EPI_ISL_541689,EPI_ISL_541690,EPI_ISL_541691,EPI_ISL_541692,EPI_ISL_541693,EPI_ISL_541694,EPI_ISL_541695,EPI_ISL_541696,EPI_ISL_541697,EPI_ISL_541698,EPI_ISL_541699,EPI_ISL_541700,EPI_ISL_541701,EPI_ISL_541702,EPI_ISL_541703,EPI_ISL_541704,EPI_ISL_541705,EPI_ISL_541706,EPI_ISL_541707,EPI_ISL_5…	National Institute of Virology, NIV Influenza	National Institute of Virology, NIV Influenza	Potdar V et al
EPI_ISL_414625	Centre Hospitalier Régional Universitaire de Nantes Laboratoire de Virologie	National Reference Center for Viruses of Respiratory Infections, Institut Pasteur, Paris	Mélnie Albert et al
EPI_ISL_888994	RSU MMC	Eijkman Institute for Molecular Biology, Ministry of Research and Technology/National Agency for Research and Innovation	Lydia V. Panggalo et al
EPI_ISL_949254,EPI_ISL_949255,EPI_ISL_948973,EPI_ISL_948975,EPI_ISL_948978,EPI_ISL_948981,EPI_ISL_948984,EPI_ISL_949070,EPI_ISL_949071,EPI_ISL_949072,EPI_ISL_949073,EPI_ISL_949074,EPI_ISL_949075,EPI_ISL_949076,EPI_ISL_949077,EPI_ISL_949078,EPI_ISL_949082,EPI_ISL_949126,EPI_ISL_949083,EPI_ISL_949084,EPI_ISL_949086,EPI_ISL_949087,EPI_ISL_949127,EPI_ISL_949088,EPI_ISL_949089,EPI_ISL_949129,EPI_ISL_9…	Jessa	Jessa	Jessa_cmdLab et al
EPI_ISL_965132	Azienda Ospedaliera San Giovanni Addolorata	INMI Lazzaro Spallanzani IRCCS	CEM Gruber et al
EPI_ISL_710576	VC Sorgenfrimottagningen	The Public Health Agency of Sweden	Department of Microbiology et al
EPI_ISL_792358,EPI_ISL_792359,EPI_ISL_792360,EPI_ISL_792361,EPI_ISL_792362,EPI_ISL_792363,EPI_ISL_792364,EPI_ISL_792365,EPI_ISL_792366,EPI_ISL_792367,EPI_ISL_792368,EPI_ISL_792369,EPI_ISL_792370	Laboratorio de Virologia - HIEAyC San Juan de Dios	Área de Secuenciación del Laboratorio de Virología del Hospital de Niños Dr. Ricardo Gutierrez on behalf of 'Proyecto Argentino Interinstitucional de genomica de SARS-CoV-2' (PAIS Consortium)	Nabaes Jodar et al
EPI_ISL_458087,EPI_ISL_458102	B.J. Medical College and Civil hospital	Gujarat Biotechnology Research Centre	Ramesh Patel et al
EPI_ISL_528991,EPI_ISL_529016,EPI_ISL_528992	Ospedale SS Annunziata-Sulmona	Istitituto Zooprofilattico Sperimentale dell'Abruzzo e Molise "G.Caporale"	Lorusso A et al
EPI_ISL_518824,EPI_ISL_518846,EPI_ISL_518847,EPI_ISL_518848,EPI_ISL_518849,EPI_ISL_518850,EPI_ISL_518851,EPI_ISL_518852,EPI_ISL_518853,EPI_ISL_518854	Oman-National Influenza Center	Biotechnology & OMICs Laboratory, Natural & Medical Sciences Research Center, University of Nizwa	Abdul Latif Khan et al
EPI_ISL_471647	Hospital Municipal de Barueri Dr. Francisco Moran	Instituto Adolfo Lutz, Interdiciplinary Procedures Center, Strategic Laboratory	Claudio Tavares Sacchi et al
EPI_ISL_960724,EPI_ISL_960804,EPI_ISL_960801,EPI_ISL_960667,EPI_ISL_960781,EPI_ISL_960776,EPI_ISL_960753,EPI_ISL_960774,EPI_ISL_960699,EPI_ISL_960700,EPI_ISL_960701,EPI_ISL_960782,EPI_ISL_960754,EPI_ISL_960713,EPI_ISL_960730,EPI_ISL_960706,EPI_ISL_960755,EPI_ISL_960812,EPI_ISL_960827,EPI_ISL_960670,EPI_ISL_960793,EPI_ISL_960794,EPI_ISL_960828,EPI_ISL_960795,EPI_ISL_960685,EPI_ISL_960731,EPI_ISL_9…	Germano de sousa	Instituto Gulbenkian de Ciencia	João Costa et al
EPI_ISL_454447,EPI_ISL_455846,EPI_ISL_454448,EPI_ISL_454449,EPI_ISL_454450,EPI_ISL_454451,EPI_ISL_454452,EPI_ISL_454453,EPI_ISL_454454,EPI_ISL_454455,EPI_ISL_454456,EPI_ISL_454457,EPI_ISL_454458,EPI_ISL_454459,EPI_ISL_454460,EPI_ISL_454461,EPI_ISL_454462,EPI_ISL_454463,EPI_ISL_454464,EPI_ISL_454465,EPI_ISL_454466,EPI_ISL_454467,EPI_ISL_454468,EPI_ISL_454469,EPI_ISL_454470,EPI_ISL_454471,EPI_ISL_4…	Karolinska Universitetslaboratoriet	The Public Health Agency of Sweden	Anna-Malin Linde et al
EPI_ISL_984998,EPI_ISL_984999,EPI_ISL_984997,EPI_ISL_985004,EPI_ISL_985002,EPI_ISL_985005,EPI_ISL_985012,EPI_ISL_985015,EPI_ISL_985010,EPI_ISL_985007,EPI_ISL_985013,EPI_ISL_985001,EPI_ISL_985006,EPI_ISL_985016,EPI_ISL_985008,EPI_ISL_985009,EPI_ISL_985011,EPI_ISL_985014,EPI_ISL_985003	S.C. Laboratorio Analisi, ASL 3 Liguria	U.O. Igiene, Ospedale Policlinico San Martino	Bruzzone Bianca et al
EPI_ISL_420796,EPI_ISL_420797,EPI_ISL_420798	Texas DSHS Lab Services	Pathogen Discovery, Respiratory Viruses Branch, Division of Viral Diseases, Centers for Disease Control and Prevention	Krista Queen et al
EPI_ISL_469043,EPI_ISL_495067	Dr. N. D. Desai Medical College & Hospital	Gujarat Biotechnology Research Centre	J G Buch et al
EPI_ISL_416499,EPI_ISL_416500	LABM GH nord Essonne	National Reference Center for Viruses of Respiratory Infections, Institut Pasteur, Paris	Mélnie Albert et al
EPI_ISL_983322	ASL LATINA PRESIDIO OSPEDALIERO NORD	INMI Lazzaro Spallanzani IRCCS	E Giombini et al
EPI_ISL_413456	Seattle Flu Study, University of Washington Medical Center	Seattle Flu Study, University of Washington Medical Center	Chu et al et al
EPI_ISL_418222	CHRU Bretonneau - Serv. Bacterio-Virol.	National Reference Center for Viruses of Respiratory Infections, Institut Pasteur, Paris	Mélanie Albert et al
EPI_ISL_872093	Instituto de Diagnostico y Referencia Epidemiologicos (INDRE)	Instituto de Diagnostico y Referencia Epidemiologicos (INDRE)	Edgar Mendieta-Condado et al
EPI_ISL_483836	Pandit Deendayal Upadhyay Government Medical College, Rajkot	Gujarat Biotechnology Research Centre	Zuber Saiyed et al
EPI_ISL_890033,EPI_ISL_890034,EPI_ISL_890035,EPI_ISL_890036,EPI_ISL_890037,EPI_ISL_890038,EPI_ISL_890039,EPI_ISL_890040,EPI_ISL_890041,EPI_ISL_890042,EPI_ISL_890043,EPI_ISL_890044,EPI_ISL_890045,EPI_ISL_890046,EPI_ISL_890047,EPI_ISL_890048,EPI_ISL_890049,EPI_ISL_890050,EPI_ISL_890051,EPI_ISL_890052,EPI_ISL_890053,EPI_ISL_890054,EPI_ISL_890055,EPI_ISL_890056,EPI_ISL_890057,EPI_ISL_890058,EPI_ISL_8…	Laboratoire de santé publique du Québec	Laboratoire de santé publique du Québec	Sandrine Moreira et al
EPI_ISL_954714,EPI_ISL_954715,EPI_ISL_954711,EPI_ISL_954712,EPI_ISL_954713,EPI_ISL_954718,EPI_ISL_954705,EPI_ISL_954706,EPI_ISL_954725,EPI_ISL_954716,EPI_ISL_954717,EPI_ISL_889844,EPI_ISL_954721,EPI_ISL_889846,EPI_ISL_954702,EPI_ISL_889847,EPI_ISL_954704,EPI_ISL_954685,EPI_ISL_954726,EPI_ISL_954686,EPI_ISL_954649,EPI_ISL_954653,EPI_ISL_954648,EPI_ISL_954652,EPI_ISL_954647,EPI_ISL_954646,EPI_ISL_9…	Laboratoire de santé publique du Québec	Laboratoire de santé publique du Québec	Sandrine Moreira et al
EPI_ISL_794119,EPI_ISL_794120,EPI_ISL_794121,EPI_ISL_794122,EPI_ISL_794123,EPI_ISL_794124,EPI_ISL_794125,EPI_ISL_794126,EPI_ISL_794127,EPI_ISL_794128,EPI_ISL_794129,EPI_ISL_794130,EPI_ISL_794131,EPI_ISL_794132,EPI_ISL_794133,EPI_ISL_794134,EPI_ISL_794135,EPI_ISL_794136,EPI_ISL_794137,EPI_ISL_794138,EPI_ISL_794139,EPI_ISL_794140,EPI_ISL_794141,EPI_ISL_794142,EPI_ISL_794143,EPI_ISL_794144,EPI_ISL_7…	NORTHWELL HEALTH LABORATORIES	Wadsworth Center, New York State Department.of Health	Kirsten St. George et al
EPI_ISL_806804,EPI_ISL_806805	SIESP CHIETI - DISTRETTO SANITARIO CHIETI	Istituto Zooprofilattico Sperimentale dell’Abruzzo e Molise “G. Caporale”	Lorusso A et al
EPI_ISL_513002,EPI_ISL_513003,EPI_ISL_513004,EPI_ISL_513005,EPI_ISL_513006,EPI_ISL_513007,EPI_ISL_513008,EPI_ISL_513009,EPI_ISL_513010,EPI_ISL_513011,EPI_ISL_513012,EPI_ISL_513013,EPI_ISL_513014,EPI_ISL_513015,EPI_ISL_513016,EPI_ISL_513017,EPI_ISL_513018,EPI_ISL_513019,EPI_ISL_513020,EPI_ISL_513021,EPI_ISL_513022,EPI_ISL_513023,EPI_ISL_513024,EPI_ISL_513025,EPI_ISL_513026,EPI_ISL_513190,EPI_ISL_5…	Pathogen Genomics Lab King Abdullah University of Science and Technology(KAUST)	Pathogen Genomics Lab King Abdullah University of Science and Technology(KAUST)	Afrah Alsomali et al
EPI_ISL_525492	RSUP dr. SOERADJI TIRTONEGORO	Genetics Working Group (Pokja Genetik) Faculty of Medicine, Public Health and Nursing Universitas Gadjah Mada (FK-KMK UGM), Disease Investigation Center Wates Ministry of Agriculture Indonesia, Department of Microbiology FK-KMK UGM, Laboratorium Diagnostik Yayasan Tahija World Mosquito Program (WMP) Yogyakarta Center for Tropical Medicine FK-KMK UGM, Integrated Research Center FK-KMK UGM, Departm…	Gunadi et al
EPI_ISL_538003,EPI_ISL_538004,EPI_ISL_538005,EPI_ISL_538006,EPI_ISL_538007,EPI_ISL_538009,EPI_ISL_538010,EPI_ISL_538011,EPI_ISL_538012,EPI_ISL_538013,EPI_ISL_538014,EPI_ISL_538015,EPI_ISL_538016,EPI_ISL_538017,EPI_ISL_538018,EPI_ISL_538019,EPI_ISL_538020,EPI_ISL_538021,EPI_ISL_538022,EPI_ISL_538023,EPI_ISL_538024,EPI_ISL_538025,EPI_ISL_538026,EPI_ISL_538027,EPI_ISL_538028,EPI_ISL_538029,EPI_ISL_5…	Hospital Universitari i Politècnic La Fe de València	SeqCOVID-SPAIN consortium/IBV(CSIC)	María Dolores Gómez Ruiz et al
EPI_ISL_912560,EPI_ISL_912599,EPI_ISL_912561,EPI_ISL_912562	HOPITAL SIMONE VEIL	National Reference Center for Viruses of Respiratory Infections, Institut Pasteur, Paris	Marion Barbet et al
EPI_ISL_775531,EPI_ISL_775532,EPI_ISL_676515,EPI_ISL_661290,EPI_ISL_775542,EPI_ISL_775543,EPI_ISL_831979,EPI_ISL_766630,EPI_ISL_766631,EPI_ISL_775544,EPI_ISL_775545,EPI_ISL_766632,EPI_ISL_789048,EPI_ISL_789049,EPI_ISL_789050,EPI_ISL_789051,EPI_ISL_789052,EPI_ISL_789053,EPI_ISL_789055,EPI_ISL_789056,EPI_ISL_789057,EPI_ISL_789058,EPI_ISL_789059	Klinisk mikrobiologi, Viruslab	The Public Health Agency of Sweden	Department of Microbiology et al
EPI_ISL_698213,EPI_ISL_698214,EPI_ISL_698215,EPI_ISL_698216,EPI_ISL_698217,EPI_ISL_698218,EPI_ISL_698219,EPI_ISL_698220,EPI_ISL_698221,EPI_ISL_698222,EPI_ISL_698223,EPI_ISL_698224,EPI_ISL_698225,EPI_ISL_698226,EPI_ISL_698227,EPI_ISL_698228,EPI_ISL_698229,EPI_ISL_698230,EPI_ISL_698231,EPI_ISL_698232,EPI_ISL_698233,EPI_ISL_698234,EPI_ISL_698235,EPI_ISL_698236,EPI_ISL_698237,EPI_ISL_698238,EPI_ISL_6…	Group 42 (G42) Healthcare, Abu Dhabi, United Arab Emirates; Department of Health, The United Arab Emirates	G42 Healthcare	Rong Liu et al
EPI_ISL_698105,EPI_ISL_698106,EPI_ISL_698107,EPI_ISL_698108,EPI_ISL_698109,EPI_ISL_698110,EPI_ISL_698111,EPI_ISL_698112,EPI_ISL_698113,EPI_ISL_698114,EPI_ISL_698115,EPI_ISL_698116,EPI_ISL_698117,EPI_ISL_698118,EPI_ISL_698119,EPI_ISL_698120,EPI_ISL_698121,EPI_ISL_698122,EPI_ISL_698123,EPI_ISL_698124,EPI_ISL_698125,EPI_ISL_698126,EPI_ISL_698127,EPI_ISL_698128,EPI_ISL_698129,EPI_ISL_698130,EPI_ISL_6…	Group 42 (G42) Healthcare, Abu Dhabi, United Arab Emirates; Department of Health, The United Arab Emirates	G42 Healthcare	Rong Liu et al
EPI_ISL_944108,EPI_ISL_944109,EPI_ISL_954611	General Hospital - Struga	Research Center for Genetic Engineering and Biotechnology "Georgi D. Efremov” , Macedonian Academy of Sciences and Arts	Aleksandar J. Dimovski et al
EPI_ISL_902750	Ospedale "F. Spaziani" Frosinone	INMI Lazzaro Spallanzani IRCCS	F Messina et al
EPI_ISL_467809,EPI_ISL_475574,EPI_ISL_475575,EPI_ISL_475576,EPI_ISL_475577,EPI_ISL_475578,EPI_ISL_475579,EPI_ISL_475580,EPI_ISL_475581,EPI_ISL_475582,EPI_ISL_475583,EPI_ISL_475584,EPI_ISL_475585,EPI_ISL_475586,EPI_ISL_475587,EPI_ISL_475588,EPI_ISL_475589,EPI_ISL_475590,EPI_ISL_475591,EPI_ISL_475592,EPI_ISL_475593,EPI_ISL_475594,EPI_ISL_475595,EPI_ISL_475596,EPI_ISL_475597,EPI_ISL_475598,EPI_ISL_4…	Cedars-Sinai Medical Center, Department of Pathology & Laboratory Medicine, Molecular Pathology Laboratory	Cedars-Sinai Medical Center, Molecular Pathology Laboratory of Department of Pathology & Laboratory Medicine and Genomic Core	Wenjuan Zhang et al
EPI_ISL_418005	CHU Coimbra - Pediátrico	Instituto Nacional de Saude (INSA)	Guiomar et al et al
EPI_ISL_918484,EPI_ISL_933722,EPI_ISL_933769	Gerontology Institute - Skopje	Research Center for Genetic Engineering and Biotechnology "Georgi D. Efremov” , Macedonian Academy of Sciences and Arts	RCGEB - MASA et al
EPI_ISL_467054	B.J. Medical College and Civil hospital	Gujarat Biotechnology Research Centre	Nirav Mungalpara et al
EPI_ISL_900522,EPI_ISL_900523,EPI_ISL_934974,EPI_ISL_900521	Novabio	CNR Virus des Infections Respiratoires - France SUD	Antonin Bal et al
EPI_ISL_751194,EPI_ISL_751195,EPI_ISL_751196,EPI_ISL_751197,EPI_ISL_751198,EPI_ISL_751199,EPI_ISL_751200	Dienststelle Gesundheit und Sport Kanton Luzern	Institute of Medical Virology, University of Zurich	Stefan Schmutz et al
EPI_ISL_913040	Hospital Universitario de Guadalajara	Instituto de Salud Carlos III	Iglesias-Caballero et al
EPI_ISL_654818,EPI_ISL_654819,EPI_ISL_582513,EPI_ISL_582511,EPI_ISL_582512,EPI_ISL_979973,EPI_ISL_654820,EPI_ISL_979972,EPI_ISL_979971,EPI_ISL_979970	Department of Respiratory and other Viral Infections of L.V.Gromashevsky Institute of Epidemiology & Infectious Diseases NAMS of Ukrainе	Department of Respiratory and other Viral Infections of L.V.Gromashevsky Institute of Epidemiology & Infectious Diseases NAMS of Ukrainе, JSC "Farmak"	Alla Mironenko et al
EPI_ISL_860899	HOPITAL PAUL BROUSSE - Service Microbiologie	National Reference Center for Viruses of Respiratory Infections, Institut Pasteur, Paris	Marion Barbet et al
EPI_ISL_735428,EPI_ISL_735429,EPI_ISL_735431,EPI_ISL_735432,EPI_ISL_861637,EPI_ISL_906066	Hospital Nipo Brasileiro	Instituto Adolfo Lutz, Interdiciplinary Procedures Center, Strategic Laboratory	Claudio Tavares Sacchi et al
EPI_ISL_516873,EPI_ISL_516880,EPI_ISL_516883,EPI_ISL_516874,EPI_ISL_516870,EPI_ISL_516867,EPI_ISL_516872,EPI_ISL_516836,EPI_ISL_516842,EPI_ISL_516854,EPI_ISL_516831,EPI_ISL_516876,EPI_ISL_516877,EPI_ISL_516878,EPI_ISL_516848,EPI_ISL_516839,EPI_ISL_516849,EPI_ISL_516865,EPI_ISL_516853,EPI_ISL_516864,EPI_ISL_516868,EPI_ISL_516855,EPI_ISL_516862,EPI_ISL_516847,EPI_ISL_516851,EPI_ISL_516852,EPI_ISL_5…	North West London Pathology, Imperial College Healthcare NHS Trust	Wellcome Sanger Institute for the COVID-19 Genomics UK (COG-UK) consortium	Ling Li et al
EPI_ISL_848199,EPI_ISL_833183	Microbiology Department. Complexo Hospitalario Universitario de Vigo	Microbiology Department. Complexo Hospitalario Universitario de Vigo	Microbiology Department et al
EPI_ISL_515465,EPI_ISL_515467,EPI_ISL_515468	Ramathibodi Hospital	National Institute of Health. Department of medical Sciences, Ministry of Public Health, Thailand	Pilailuk et al
EPI_ISL_530094,EPI_ISL_530095,EPI_ISL_530096,EPI_ISL_530097,EPI_ISL_530098,EPI_ISL_530099	Hospital Universitario Ramón y Cajal	Hospital Universitario 12 de Octubre	Raúl Recio et al
EPI_ISL_875550,EPI_ISL_888671,EPI_ISL_875545,EPI_ISL_875543,EPI_ISL_875549,EPI_ISL_875546,EPI_ISL_875547,EPI_ISL_888672	Instituto de Biotecnologia - UNESP-Botucatu-SP	Instituto de Biotecnologia - UNESP-Botucatu-SP	Leila Sabrina Ullmann et al
EPI_ISL_976858,EPI_ISL_976859,EPI_ISL_976083,EPI_ISL_976879,EPI_ISL_976125,EPI_ISL_976215,EPI_ISL_976260,EPI_ISL_976298,EPI_ISL_976299,EPI_ISL_976473,EPI_ISL_976474,EPI_ISL_976475,EPI_ISL_976476,EPI_ISL_976477,EPI_ISL_976478,EPI_ISL_976479,EPI_ISL_976480,EPI_ISL_976481,EPI_ISL_976482,EPI_ISL_976506,EPI_ISL_976507,EPI_ISL_976508,EPI_ISL_976509,EPI_ISL_976510,EPI_ISL_976511,EPI_ISL_976512,EPI_ISL_9…	BCCDC Public Health Laboratory	BCCDC Public Health Laboratory	Prystajecky Natalie et al
EPI_ISL_968458,EPI_ISL_969138,EPI_ISL_969139,EPI_ISL_969140,EPI_ISL_969141,EPI_ISL_969142,EPI_ISL_969157,EPI_ISL_969158,EPI_ISL_969159,EPI_ISL_969160,EPI_ISL_969161,EPI_ISL_969162,EPI_ISL_969163,EPI_ISL_969164,EPI_ISL_969165,EPI_ISL_969166,EPI_ISL_969175,EPI_ISL_969176,EPI_ISL_969177,EPI_ISL_969178,EPI_ISL_969179,EPI_ISL_969180,EPI_ISL_969181,EPI_ISL_969182,EPI_ISL_969183,EPI_ISL_969184,EPI_ISL_9…	BCCDC Public Health Laboratory	BCCDC Public Health Laboratory	Prystajecky Natalie et al
EPI_ISL_973891,EPI_ISL_973892,EPI_ISL_973893,EPI_ISL_973914,EPI_ISL_973915,EPI_ISL_973916,EPI_ISL_973917,EPI_ISL_973918,EPI_ISL_973919,EPI_ISL_973920,EPI_ISL_973921,EPI_ISL_973922,EPI_ISL_973923,EPI_ISL_973924,EPI_ISL_973925,EPI_ISL_973926,EPI_ISL_973927,EPI_ISL_973928,EPI_ISL_973929,EPI_ISL_973930,EPI_ISL_973931,EPI_ISL_973932,EPI_ISL_973955,EPI_ISL_973956,EPI_ISL_973957,EPI_ISL_973958,EPI_ISL_9…	BCCDC Public Health Laboratory	BCCDC Public Health Laboratory	Prystajecky Natalie et al
EPI_ISL_974796,EPI_ISL_974797,EPI_ISL_974798,EPI_ISL_974103,EPI_ISL_974127,EPI_ISL_974128,EPI_ISL_974152,EPI_ISL_974153,EPI_ISL_974154,EPI_ISL_974155,EPI_ISL_974156,EPI_ISL_974190,EPI_ISL_974191,EPI_ISL_974192,EPI_ISL_974193,EPI_ISL_974194,EPI_ISL_974195,EPI_ISL_974209,EPI_ISL_974210,EPI_ISL_974211,EPI_ISL_974222,EPI_ISL_974223,EPI_ISL_974807,EPI_ISL_974808,EPI_ISL_974809,EPI_ISL_974810,EPI_ISL_9…	BCCDC Public Health Laboratory	BCCDC Public Health Laboratory	Prystajecky Natalie et al
EPI_ISL_975482,EPI_ISL_975530,EPI_ISL_975584,EPI_ISL_975585,EPI_ISL_975607,EPI_ISL_975608,EPI_ISL_975609,EPI_ISL_975610,EPI_ISL_975640,EPI_ISL_975672,EPI_ISL_975673,EPI_ISL_975709,EPI_ISL_975750,EPI_ISL_975751,EPI_ISL_975752,EPI_ISL_975753,EPI_ISL_975772,EPI_ISL_975773,EPI_ISL_975774,EPI_ISL_975800,EPI_ISL_975801,EPI_ISL_975831,EPI_ISL_975832,EPI_ISL_975833,EPI_ISL_975834,EPI_ISL_975835,EPI_ISL_9…	BCCDC Public Health Laboratory	BCCDC Public Health Laboratory	Prystajecky Natalie et al
EPI_ISL_976887,EPI_ISL_976456,EPI_ISL_976457,EPI_ISL_976458,EPI_ISL_976459,EPI_ISL_976460,EPI_ISL_976461,EPI_ISL_976462,EPI_ISL_976463,EPI_ISL_976464,EPI_ISL_976499,EPI_ISL_976500,EPI_ISL_976501,EPI_ISL_976523,EPI_ISL_976524,EPI_ISL_976525,EPI_ISL_976526,EPI_ISL_976527,EPI_ISL_976528,EPI_ISL_976542,EPI_ISL_976543,EPI_ISL_976544,EPI_ISL_976545,EPI_ISL_976546,EPI_ISL_976580,EPI_ISL_976581,EPI_ISL_9…	BCCDC Public Health Laboratory	BCCDC Public Health Laboratory	Prystajecky Natalie et al
EPI_ISL_915430,EPI_ISL_915431,EPI_ISL_915432,EPI_ISL_915433,EPI_ISL_918430	Bundeswehrkrankenhaus Westerstede	Bundeswehr Institute of Microbiology	Markus Antwerpen et al
EPI_ISL_602518,EPI_ISL_602519,EPI_ISL_602520,EPI_ISL_602521,EPI_ISL_602522,EPI_ISL_602523,EPI_ISL_602524,EPI_ISL_602525,EPI_ISL_717977,EPI_ISL_602526,EPI_ISL_602527,EPI_ISL_602528,EPI_ISL_602529,EPI_ISL_602530,EPI_ISL_602531,EPI_ISL_602532,EPI_ISL_602487,EPI_ISL_602488,EPI_ISL_602489,EPI_ISL_602490,EPI_ISL_602491,EPI_ISL_602492,EPI_ISL_602493,EPI_ISL_602494,EPI_ISL_602495,EPI_ISL_602496,EPI_ISL_6…	Institute for Virology, University Hospital Essen	Center of Medical Microbiology, Virology, and Hospital Hygiene, University of Duesseldorf	Olympia E. Anastasiou et al
EPI_ISL_534317	Hospital Geral de Itapevi	Instituto Adolfo Lutz, Interdiciplinary Procedures Center, Strategic Laboratory	Claudio Tavares Sacchi et al
EPI_ISL_791985	RS Santa Maria Pekanbaru	National Institute of Health Research and Development	Puspa et al
EPI_ISL_497341,EPI_ISL_495666,EPI_ISL_495667,EPI_ISL_495668,EPI_ISL_495669,EPI_ISL_495670,EPI_ISL_495671,EPI_ISL_495672,EPI_ISL_495673,EPI_ISL_495674,EPI_ISL_495676,EPI_ISL_495677,EPI_ISL_495679,EPI_ISL_495680,EPI_ISL_495681,EPI_ISL_495682,EPI_ISL_495683,EPI_ISL_495684,EPI_ISL_495685,EPI_ISL_495686,EPI_ISL_495687,EPI_ISL_495688,EPI_ISL_495689,EPI_ISL_495690,EPI_ISL_495692,EPI_ISL_495693,EPI_ISL_4…	Washington State Department of Health	Seattle Flu Study	Deborah A. Nickerson et al
EPI_ISL_497687,EPI_ISL_497688,EPI_ISL_497689,EPI_ISL_497690,EPI_ISL_497691,EPI_ISL_497692,EPI_ISL_497693,EPI_ISL_497694,EPI_ISL_497695,EPI_ISL_497696,EPI_ISL_497697,EPI_ISL_497698,EPI_ISL_497699,EPI_ISL_497700,EPI_ISL_497701,EPI_ISL_497702,EPI_ISL_497703,EPI_ISL_497704,EPI_ISL_497705,EPI_ISL_497706,EPI_ISL_497707,EPI_ISL_497708,EPI_ISL_497709,EPI_ISL_497710,EPI_ISL_497711,EPI_ISL_497712,EPI_ISL_4…	Washington State Department of Health	Seattle Flu Study	Deborah A. Nickerson et al
EPI_ISL_912056,EPI_ISL_912058,EPI_ISL_912060,EPI_ISL_912063,EPI_ISL_912064,EPI_ISL_912066,EPI_ISL_912068,EPI_ISL_912069,EPI_ISL_912070,EPI_ISL_912071,EPI_ISL_912072,EPI_ISL_912073,EPI_ISL_912074,EPI_ISL_912075,EPI_ISL_912076,EPI_ISL_912077,EPI_ISL_912078,EPI_ISL_912079,EPI_ISL_912080,EPI_ISL_912081,EPI_ISL_912082,EPI_ISL_912084,EPI_ISL_912085,EPI_ISL_912086,EPI_ISL_912088,EPI_ISL_912089,EPI_ISL_9…	Washington State Department of Health	Seattle Flu Study	Deborah A. Nickerson et al
EPI_ISL_455432,EPI_ISL_455434	Instituto de Diagnostico y Referencia Epidemiologicos (INDRE)	Instituto de Diagnostico y Referencia Epidemiologicos (INDRE)	Taboada Ramírez Blanca. Ramirez-Gonzalez Ernesto et al
EPI_ISL_586534	General Hospital,Chhotaudepur	Gujarat Biotechnology Research Centre	Maharshi Pandya et al
EPI_ISL_871826,EPI_ISL_871831,EPI_ISL_871829,EPI_ISL_871830,EPI_ISL_871828,EPI_ISL_871827,EPI_ISL_871823,EPI_ISL_871824,EPI_ISL_871825,EPI_ISL_871821,EPI_ISL_871822,EPI_ISL_871820,EPI_ISL_871838,EPI_ISL_871832,EPI_ISL_871833,EPI_ISL_871839,EPI_ISL_871834,EPI_ISL_871835,EPI_ISL_871836,EPI_ISL_871837	Jessa	Jessa	Brigitte Maes et al
EPI_ISL_412459	Jingzhou Center for Disease Control and Prevention	Hubei Provincial Center for Disease Control and Prevention	Bin Fang et al
EPI_ISL_682239	HOSPITAL CIUDAD NEILY	Inciensa, Instituto Costarricense de Investigación y Enseñanza en Nutrición y Salud	Francisco Duarte et al
EPI_ISL_445272,EPI_ISL_445285,EPI_ISL_445287	CLINICA CIUDAD DEL MAR	Instituto de Salud Publica de Chile	Andrés E Castillo et al
EPI_ISL_733461,EPI_ISL_733462,EPI_ISL_733463,EPI_ISL_733465,EPI_ISL_733466,EPI_ISL_733468,EPI_ISL_733470,EPI_ISL_733473,EPI_ISL_872898,EPI_ISL_872899,EPI_ISL_872900,EPI_ISL_872901,EPI_ISL_872902,EPI_ISL_872903,EPI_ISL_507205,EPI_ISL_602412,EPI_ISL_733394,EPI_ISL_602413,EPI_ISL_733395,EPI_ISL_602414,EPI_ISL_602415,EPI_ISL_602416,EPI_ISL_872904,EPI_ISL_872905,EPI_ISL_872906,EPI_ISL_872907,EPI_ISL_8…	WHO National Influenza Centre Russian Federation	WHO National Influenza Centre Russian Federation	Andrey Komissarov et al
EPI_ISL_491450,EPI_ISL_491454,EPI_ISL_491456	Hospital San Juan de Dios	Inciensa, Instituto Costarricense de Investigación y Enseñanza en Nutrición y Salud	Francisco Duarte et al
EPI_ISL_455355,EPI_ISL_754776,EPI_ISL_754749,EPI_ISL_754751,EPI_ISL_754752,EPI_ISL_754753,EPI_ISL_754754,EPI_ISL_754755,EPI_ISL_754756,EPI_ISL_754757,EPI_ISL_754758,EPI_ISL_754759,EPI_ISL_754760,EPI_ISL_754761,EPI_ISL_754762,EPI_ISL_754763,EPI_ISL_754764,EPI_ISL_754765,EPI_ISL_754777,EPI_ISL_754778,EPI_ISL_454690,EPI_ISL_455356,EPI_ISL_455360,EPI_ISL_754766,EPI_ISL_754750,EPI_ISL_754767,EPI_ISL_7…	Emory Molecular Diagnostics Laboratory, Emory Healthcare	Piantadosi Lab, Emory Department of Pathology	Ahmed Babiker et al
EPI_ISL_914796,EPI_ISL_914797,EPI_ISL_914813,EPI_ISL_914824,EPI_ISL_914829	TAMIZAJE COMUNITARIO - PASO CANOAS	Inciensa, Instituto Costarricense de Investigación y Enseñanza en Nutrición y Salud	Francisco Duarte et al
EPI_ISL_745121	Calvinia Hospital	National Health Laboratory Service (NHLS), Tygerberg	Susan Engelbrecht et al
EPI_ISL_541759,EPI_ISL_541752,EPI_ISL_541782,EPI_ISL_541763,EPI_ISL_541758,EPI_ISL_541776,EPI_ISL_541768,EPI_ISL_541770,EPI_ISL_541775,EPI_ISL_541754,EPI_ISL_541755,EPI_ISL_541772,EPI_ISL_541760,EPI_ISL_541779,EPI_ISL_541777,EPI_ISL_541757,EPI_ISL_541761,EPI_ISL_541781,EPI_ISL_541778,EPI_ISL_541769,EPI_ISL_541780,EPI_ISL_541771,EPI_ISL_541766,EPI_ISL_541764,EPI_ISL_541762,EPI_ISL_541765	Barts Health NHS Trust	Wellcome Sanger Institute for the COVID-19 Genomics UK (COG-UK) consortium	Teresa Cutino-Moguel et al
EPI_ISL_524732,EPI_ISL_514435	Dr. RSS Hospital, Modasa	Gujarat Biotechnology Research Centre	Harsh Chaudhari et al
EPI_ISL_885152,EPI_ISL_979544,EPI_ISL_885153,EPI_ISL_885154,EPI_ISL_979799,EPI_ISL_979801,EPI_ISL_979802,EPI_ISL_979803,EPI_ISL_979804,EPI_ISL_979893,EPI_ISL_979959,EPI_ISL_979960,EPI_ISL_979961,EPI_ISL_979963,EPI_ISL_979964,EPI_ISL_979965,EPI_ISL_979968,EPI_ISL_979969,EPI_ISL_862832,EPI_ISL_979967,EPI_ISL_875346,EPI_ISL_794744,EPI_ISL_862834,EPI_ISL_862835,EPI_ISL_979966,EPI_ISL_862831,EPI_ISL_8…	National Institute of Infectious Diseases-Prof. Dr. Matei Bals Molecular Diagnostics Laboratory	National Institute of Infectious Diseases-Prof. Dr. Matei Bals Molecular Diagnostics Laboratory	Leontina Banica et al
EPI_ISL_524744,EPI_ISL_476866,EPI_ISL_483820	GMERS Medical College and Hospital, Gandhinagar	Gujarat Biotechnology Research Centre	Komal Patel et al
EPI_ISL_528751	Santo Borromeus Hospital	Molecular Genetics Laboratory-Faculty of Medicine-Universitas Padjadjaran; School of Life Sciences and Technology & School of Pharmacy-Institut Teknologi Bandung; Laboratorium Kesehatan Provinsi Jawa Barat	Yunia Sribudiani et al
EPI_ISL_965028,EPI_ISL_965031,EPI_ISL_613706,EPI_ISL_613953,EPI_ISL_613955,EPI_ISL_614398,EPI_ISL_614397,EPI_ISL_614396,EPI_ISL_614889,EPI_ISL_637107,EPI_ISL_637108,EPI_ISL_613710,EPI_ISL_637109,EPI_ISL_458084	Laboratorio Biologia Molecolare Sars Cov2 - UOC Laboratorio Analisi - Servizio Medicina di Laboratorio, Ospedale "San Francesco" - ATS-ASSL Nuoro	Laboratorio specialistico UOC Ematologia - Ospedale "San Francesco" - ATS-ASSL Nuoro	Piras Giovanna et al
EPI_ISL_745193,EPI_ISL_745192	Ospedale Di Venere	Istituto Zooprofilattico Sperimentale della Puglia e della Basilicata	Parisi A. et al
EPI_ISL_959849,EPI_ISL_959857,EPI_ISL_959851,EPI_ISL_959820,EPI_ISL_959813,EPI_ISL_959809,EPI_ISL_959837,EPI_ISL_959830,EPI_ISL_959833,EPI_ISL_959834,EPI_ISL_959802,EPI_ISL_959801,EPI_ISL_959706,EPI_ISL_875381,EPI_ISL_578246,EPI_ISL_578247,EPI_ISL_578248,EPI_ISL_732432,EPI_ISL_732517,EPI_ISL_671864,EPI_ISL_752534,EPI_ISL_752537,EPI_ISL_732433,EPI_ISL_837398,EPI_ISL_875413,EPI_ISL_875431,EPI_ISL_9…	National Virus Reference Laboratory	National Virus Reference Laboratory	Michael Carr et al
EPI_ISL_752561,EPI_ISL_752582,EPI_ISL_752589,EPI_ISL_752597,EPI_ISL_837392,EPI_ISL_837345,EPI_ISL_875444,EPI_ISL_909942,EPI_ISL_909844,EPI_ISL_959836,EPI_ISL_959824,EPI_ISL_959825,EPI_ISL_639883,EPI_ISL_639876,EPI_ISL_639875,EPI_ISL_875409,EPI_ISL_875356,EPI_ISL_909876,EPI_ISL_909808,EPI_ISL_909925,EPI_ISL_909888,EPI_ISL_909784,EPI_ISL_909881,EPI_ISL_959723,EPI_ISL_959714,EPI_ISL_959716,EPI_ISL_9…	National Virus Reference Laboratory	National Virus Reference Laboratory	Michael Carr et al
EPI_ISL_469253	Second Military Medical University, Department of Microbiology	Second Military Medical University, Department of Microbiology	Peng et al
EPI_ISL_861638,EPI_ISL_861640,EPI_ISL_861641	Hospital Municipal Dr. Moyses Deutsch	Instituto Adolfo Lutz, Interdiciplinary Procedures Center, Strategic Laboratory	Claudio Tavares Sacchi et al
EPI_ISL_455729,EPI_ISL_455721	Servicio de Microbiologia. Hospital Clinico Universitario de Valencia	Sequencing and Bioinformatics Service and Molecular Epidemiology Research Group. FISABIO-Public Health, and SeqCOVID-Spain Consortium	Sandra Carbo et al
EPI_ISL_751633,EPI_ISL_751561,EPI_ISL_751710,EPI_ISL_751711,EPI_ISL_751775,EPI_ISL_751713,EPI_ISL_751738,EPI_ISL_751640,EPI_ISL_903853,EPI_ISL_903849	MT Public Health Laboratory	Genomics and Discovery, Respiratory Viruses Branch, Division of Viral Diseases, Centers for Disease Control and Prevention	Krista Queen et al
EPI_ISL_419210	The Chaim Sheba Medical Center	Israel Institute for Biological Research	Inbar Cohen-Gihon et al
EPI_ISL_913099,EPI_ISL_913100,EPI_ISL_913101	ZIMCL Medical University of Innsbruck	Center for Virology	Jeremy V. Camp et al
EPI_ISL_413618,EPI_ISL_413619,EPI_ISL_413620,EPI_ISL_413621,EPI_ISL_413622,EPI_ISL_413623	unknown	Pathogen Discovery, Respiratory Viruses Branch, Division of Viral Diseases, Centers for Disease Control and Prevention	Clinton R. Paden et al
EPI_ISL_410044	California Department of Public Health	Pathogen Discovery, Respiratory Viruses Branch, Division of Viral Diseases, Centers for Disease Control and Prevention	Jing Zhang et al
EPI_ISL_455726	Servicio de Microbiologia. Hospital Clinico Universitario de Valencia	Sequencing and Bioinformatics Service and Molecular Epidemiology Research Group. FISABIO-Public Health, and SeqCOVID-Spain Consortium	Inma Galán Vendrell et al
EPI_ISL_574606	RS Siloam Purwakarta	Eijkman Institute for Molecular Biology, Ministry of Research and Technology/National Agency for Research and Innovation	Frilasita A Yudhaputri et al
EPI_ISL_729737,EPI_ISL_729740,EPI_ISL_729739	Grubaugh Lab - Yale School of Public Health	Grubaugh Lab - Yale School of Public Health	Joseph Fauver et al
EPI_ISL_508687,EPI_ISL_508688,EPI_ISL_508689,EPI_ISL_508690,EPI_ISL_508691,EPI_ISL_508692,EPI_ISL_508693,EPI_ISL_508694,EPI_ISL_508695,EPI_ISL_508696,EPI_ISL_508697,EPI_ISL_508698,EPI_ISL_508699,EPI_ISL_508700,EPI_ISL_508701,EPI_ISL_508702,EPI_ISL_508703,EPI_ISL_508704	Institut für Virologie und Epidemiologie der Viruskrankheiten, Universitätsklinikum Tübingen	NGS Competence Center Tübingen, Institut für Medizinische Mikrobiologie und Hygiene, Universitätsklinikum Tübingen	Angel Angelov et al
EPI_ISL_700581,EPI_ISL_700587,EPI_ISL_700492,EPI_ISL_700441,EPI_ISL_700590,EPI_ISL_700563,EPI_ISL_700539,EPI_ISL_700504,EPI_ISL_700554,EPI_ISL_700467,EPI_ISL_700496	Conville CDC wc CVC	NHLS/UCT	Houriiyah Tegally et al
EPI_ISL_486842,EPI_ISL_486843,EPI_ISL_486844,EPI_ISL_486845,EPI_ISL_486846,EPI_ISL_486847,EPI_ISL_486848,EPI_ISL_486849,EPI_ISL_486850,EPI_ISL_697785,EPI_ISL_486851,EPI_ISL_491932,EPI_ISL_491939,EPI_ISL_491940,EPI_ISL_491936,EPI_ISL_491937,EPI_ISL_491938,EPI_ISL_697783,EPI_ISL_697784,EPI_ISL_697786,EPI_ISL_527809,EPI_ISL_527810,EPI_ISL_527811,EPI_ISL_527812,EPI_ISL_527813,EPI_ISL_527814,EPI_ISL_5…	Institute of Microbiology, Universidad San Francisco de Quito	Institute of Microbiology, Universidad San Francisco de Quito	Belén Prado-Vivar et al
EPI_ISL_445238	Ã–resundslakarna	The Public Health Agency of Sweden	Del Akrawi et al
EPI_ISL_463001,EPI_ISL_463005,EPI_ISL_463002,EPI_ISL_463003,EPI_ISL_463006,EPI_ISL_463004	unknown	Clinical virology	Fares et al
EPI_ISL_524739,EPI_ISL_447547	GMERS Medical College and Hospital, Gandhinagar	Gujarat Biotechnology Research Centre	Pinal Trivedi et al
EPI_ISL_413588,EPI_ISL_413589,EPI_ISL_413590	MHC Utrecht	Erasmus Medical Center	David Nieuwenhuijse et al
EPI_ISL_450842,EPI_ISL_450843	COVID-19 Laboratory	DNA Solution Ltd.	Sharif Akhteruzzaman et al
EPI_ISL_458287	Biosafety Department PCL3	Biosafety Department PCL3	Lemriss et al
EPI_ISL_510820,EPI_ISL_510821,EPI_ISL_510822,EPI_ISL_510823,EPI_ISL_510824,EPI_ISL_510867	Klinisk mikrobiologi centralsjukhuset Karlstad	The Public Health Agency of Sweden	Oskar Karlsson Lindsjo et al
EPI_ISL_458106,EPI_ISL_447543	Gujarat Biotechnology Research Centre	Gujarat Biotechnology Research Centre	Pritesh Sabara et al
EPI_ISL_644703,EPI_ISL_644704,EPI_ISL_644705,EPI_ISL_644706,EPI_ISL_660732,EPI_ISL_660733,EPI_ISL_660734,EPI_ISL_644707,EPI_ISL_644708,EPI_ISL_660735,EPI_ISL_644709,EPI_ISL_644710,EPI_ISL_660736,EPI_ISL_644711,EPI_ISL_644712,EPI_ISL_660737,EPI_ISL_644713,EPI_ISL_644714,EPI_ISL_660738,EPI_ISL_660739,EPI_ISL_660740,EPI_ISL_645212,EPI_ISL_649188,EPI_ISL_660741,EPI_ISL_645213,EPI_ISL_645214	Unité des Virus Émergents	CNR Virus des Infections Respiratoires - France SUD	Antonin Bal et al
EPI_ISL_631504,EPI_ISL_631808,EPI_ISL_631811,EPI_ISL_631995,EPI_ISL_632129,EPI_ISL_632141,EPI_ISL_632157,EPI_ISL_632159	Wyckoff Heights Medical Center	New York City Public Health Laboratory	Jade Wang et al
EPI_ISL_693233	Hospital Santa Cruz	Instituto Adolfo Lutz, Interdiciplinary Procedures Center, Strategic Laboratory	Claudio Tavares Sacchi et al
EPI_ISL_404227	Zhejiang Provincial Center for Disease Control and Prevention	Department of Microbiology, Zhejiang Provincial Center for Disease Control and Prevention	Yin Chen et al
EPI_ISL_443183,EPI_ISL_443253,EPI_ISL_443254,EPI_ISL_443255,EPI_ISL_443256,EPI_ISL_443257,EPI_ISL_445077	M Health Fairview	University of Minnesota Genomics Center	Daryl M. Gohl et al
EPI_ISL_540432,EPI_ISL_540433,EPI_ISL_576175,EPI_ISL_576176,EPI_ISL_576172,EPI_ISL_812204,EPI_ISL_812205,EPI_ISL_812206,EPI_ISL_812207,EPI_ISL_812208,EPI_ISL_812209,EPI_ISL_812210,EPI_ISL_812211,EPI_ISL_812212,EPI_ISL_812213,EPI_ISL_812214,EPI_ISL_812215,EPI_ISL_812216,EPI_ISL_812217,EPI_ISL_812218,EPI_ISL_812219,EPI_ISL_812132,EPI_ISL_812220,EPI_ISL_812221,EPI_ISL_812222,EPI_ISL_812223,EPI_ISL_8…	TN Division of Laboratory Services	Pathogen Discovery, Respiratory Viruses Branch, Division of Viral Diseases, Centers for Disease Control and Prevention	Yan Li et al
EPI_ISL_437188,EPI_ISL_529965,EPI_ISL_759962	RSUD Dr. Soetomo	Institute of Tropical Disease, Universitas Airlangga	Krisnoadi Rahardjo et al
EPI_ISL_903941,EPI_ISL_903892,EPI_ISL_903913,EPI_ISL_903856,EPI_ISL_903591,EPI_ISL_903761,EPI_ISL_903810,EPI_ISL_903833,EPI_ISL_903844,EPI_ISL_903915	CDPH, Viral and Rickettsial Disease Laboratory	Genomics and Discovery, Respiratory Viruses Branch, Division of Viral Diseases, Centers for Disease Control and Prevention	Krista Queen et al
EPI_ISL_833497	Klinik Apotek Dein, Jakarta, Indonesia	Biosafety Level-3 Laboratory, Indonesian Institute of Sciences (LIPI)	Syam Budi Iryanto et al
EPI_ISL_450506	Clinical Laboratory, Hospital Israelita Albert Einstein	Clinical Laboratory, Hospital Israelita Albert Einstein	Malta et al
EPI_ISL_956312,EPI_ISL_956316	Institute of Tropical Disease	Institute of Tropical Disease, Universitas Airlangga	Krisnoadi Rahardjo et al
EPI_ISL_961750	Ospedale Cvile Atri Med. Interna	Istituto Zooprofilattico Sperimentale dell’Abruzzo e Molise “G. Caporale”	Lorusso A et al
EPI_ISL_506041	Biology Dpt, HIA Percy	Microbiology and Infectious Diseases Dpt	Emmanuelle Billon-Denis et al
EPI_ISL_434646,EPI_ISL_445228,EPI_ISL_434667,EPI_ISL_445240,EPI_ISL_450824,EPI_ISL_455104,EPI_ISL_455109	Ulltuna Vardcentral	The Public Health Agency of Sweden	Heidi Lindback et al
EPI_ISL_458094,EPI_ISL_467045,EPI_ISL_444470,EPI_ISL_447042	B.J. Medical College and Civil hospital	Gujarat Biotechnology Research Centre	Nitin Savaliya et al
EPI_ISL_654885,EPI_ISL_654884	Pasteur Institute in Ho Chi Minh city	Department of Microbiology and Immunology - Pasteur Institute in Ho Chi Minh city	Nguyễn Vũ Thượng et al
EPI_ISL_586538	Zydus Medical Hospital,Dahod	Gujarat Biotechnology Research Centre	Nitin Savaliya et al
EPI_ISL_426361,EPI_ISL_426362,EPI_ISL_426363,EPI_ISL_426365	Instituto Nacional de Ciencias Medicas y Nutricion Salvador Zubiran	Instituto Nacional de Ciencias Medicas y Nutricion Salvador Zubiran	Guillermo M. Ruiz-Palacios et al
EPI_ISL_454581,EPI_ISL_454583,EPI_ISL_454588,EPI_ISL_454592,EPI_ISL_454595,EPI_ISL_454578	University Hospital for Infectious Diseases "Dr. Fran Mihaljević", Research Unit	University of Zagreb, Centre for research and knowledge transfer in biotechnology	Ivan-Christian Kurolt et al
EPI_ISL_434709,EPI_ISL_434697,EPI_ISL_434708	unknown	National Institute of Health. Department of medical Sciences, Ministry of Public Health, Thailand	Pilailuk et al
EPI_ISL_593769,EPI_ISL_526129,EPI_ISL_526205,EPI_ISL_544963,EPI_ISL_545002,EPI_ISL_591518	The Children's Hospital at Westmead	NSW Health Pathology - Institute of Clinical Pathology and Medical Research; Westmead Hospital; University of Sydney	CIDM-PH et al. et al
EPI_ISL_853822,EPI_ISL_853823,EPI_ISL_853824,EPI_ISL_853825,EPI_ISL_853826,EPI_ISL_853827,EPI_ISL_853877,EPI_ISL_853828,EPI_ISL_853829,EPI_ISL_853830,EPI_ISL_853831,EPI_ISL_853878,EPI_ISL_853879,EPI_ISL_853832,EPI_ISL_853880,EPI_ISL_853881,EPI_ISL_853833,EPI_ISL_853882,EPI_ISL_853759,EPI_ISL_853834,EPI_ISL_853883,EPI_ISL_853835,EPI_ISL_853884,EPI_ISL_853960,EPI_ISL_853885,EPI_ISL_853886,EPI_ISL_8…	Center for Virology, Medical University of Vienna	Bergthaler laboratory, CeMM Research Center for Molecular Medicine of the Austrian Academy of Sciences	Lukas Endler et al
EPI_ISL_536106,EPI_ISL_536205	Hôpital régional de Rimouski	Laboratoire de santé publique du Québec	Sandrine Moreira et al
EPI_ISL_735493	Cox's Bazar Medicila College	Central Biological Research Laboratory and Department of Biochemistry and Molecular Biology Central Biological Research Laboratory and Department of Biochemistry and Molecular Biology	Robiul Hasan Bhuiyan et al
EPI_ISL_499083	Instituto de Virologia "Dr. J. M. Vanella", Facultad de Ciencias Medicas, Universidad Nacional de Cordoba. Laboratorio Central de la Provincia de Cordoba, Argentina. Ministerio de Salud de la provincia de Cordoba, Argentina.	Laboratorio de Virología, Hospital de Niños Ricardo Gutiérrez, CABA, Argentina.	Sandra Gallego et al
EPI_ISL_591512,EPI_ISL_591513,EPI_ISL_591514,EPI_ISL_591515,EPI_ISL_591516,EPI_ISL_593755,EPI_ISL_699641,EPI_ISL_593756,EPI_ISL_593757,EPI_ISL_593758,EPI_ISL_593759,EPI_ISL_593760,EPI_ISL_593761,EPI_ISL_593762,EPI_ISL_593763,EPI_ISL_593764,EPI_ISL_593765,EPI_ISL_629002,EPI_ISL_639729,EPI_ISL_639730,EPI_ISL_639732,EPI_ISL_639734,EPI_ISL_639735,EPI_ISL_767876,EPI_ISL_767900,EPI_ISL_767901,EPI_ISL_7…	Sydney South West Pathology Service (SSWPS) - Liverpool Hospital - NSW Health Pathology	NSW Health Pathology - Institute of Clinical Pathology and Medical Research; Westmead Hospital; University of Sydney	CIDM-PH et al. et al
EPI_ISL_806783	Casa di cura Di Lorenzo- Avezzano	Istituto Zooprofilattico Sperimentale dell’Abruzzo e Molise “G. Caporale”	Lorusso A et al
EPI_ISL_930842,EPI_ISL_930834,EPI_ISL_930843,EPI_ISL_930835	Virology, ICAR-National Research Centre on Equines	Virology, ICAR-National Research Centre on Equines	Kumar et al
EPI_ISL_458150	ANOUAL	ANOUAL	Jouali Farah et al
EPI_ISL_582806,EPI_ISL_582807,EPI_ISL_648193	Klinisk mikrobiologi SAS Boras	The Public Health Agency of Sweden	Anna-Malin Linde et al
EPI_ISL_476832	Medical Biology Department, Kocaeli University	Medical Genetics Department, Kocaeli University	Savli H et al
EPI_ISL_888986	RSU Bhakti Kartini	Eijkman Institute for Molecular Biology, Ministry of Research and Technology/National Agency for Research and Innovation	Edison Johar et al
EPI_ISL_593921	Hospital, Fameck	National Reference Center for Viruses of Respiratory Infections, Institut Pasteur, Paris	Sylvie Behillil et al
EPI_ISL_955905	Pamela Youde Nethersole Eastern Hospital	Hong Kong Department of Health	Alan K.L. Tsang et al
EPI_ISL_735503	ACT Pathology	Schwessinger Lab	Robyn N Hall et al
EPI_ISL_495025	Government Medical College, Bhavnagar	Gujarat Biotechnology Research Centre	Dinesh Kumar et al
EPI_ISL_416458	Virology laboratory Ministry of Health Kuwait sequenced at Dasman Diabetes Institute	Dasman Diabetes Institute	Fahd Al-Mulla et al
EPI_ISL_648123,EPI_ISL_647987,EPI_ISL_647988,EPI_ISL_647989,EPI_ISL_527658,EPI_ISL_527659,EPI_ISL_527660,EPI_ISL_527661,EPI_ISL_527662,EPI_ISL_527663,EPI_ISL_527664,EPI_ISL_527665,EPI_ISL_648002,EPI_ISL_648003,EPI_ISL_681776,EPI_ISL_681777,EPI_ISL_681778,EPI_ISL_681779,EPI_ISL_681780,EPI_ISL_681781,EPI_ISL_681782,EPI_ISL_681783,EPI_ISL_681784,EPI_ISL_681785,EPI_ISL_681786,EPI_ISL_681787,EPI_ISL_6…	GA Department of Public Health Laboratory	Pathogen Discovery, Respiratory Viruses Branch, Division of Viral Diseases, Centers for Disease Control and Prevention	Yan Li et al
EPI_ISL_728290,EPI_ISL_728291,EPI_ISL_728295,EPI_ISL_728297,EPI_ISL_728301,EPI_ISL_728322,EPI_ISL_728332,EPI_ISL_728334,EPI_ISL_728336,EPI_ISL_728339,EPI_ISL_728340,EPI_ISL_728342,EPI_ISL_728344,EPI_ISL_728347,EPI_ISL_728349,EPI_ISL_728352,EPI_ISL_728353,EPI_ISL_728355,EPI_ISL_728359,EPI_ISL_728360,EPI_ISL_728272,EPI_ISL_728363,EPI_ISL_728366,EPI_ISL_728367,EPI_ISL_768831,EPI_ISL_768832,EPI_ISL_7…	Laboratoire Biolife	Laboratoire de Biotechnologie	Mouna Ouadghiri et al
EPI_ISL_569611	Sioux Falls Urgent Care	South Dakota Public Health Laboratory	Matt Plumb et al
EPI_ISL_467967	Scripps Medical Laboratory	Andersen lab at Scripps Research	SEARCH Alliance San Diego with Tracy Basler et al
EPI_ISL_947270,EPI_ISL_888991	RS Mitra Keluarga Gading Serpong	Eijkman Institute for Molecular Biology, Ministry of Research and Technology/National Agency for Research and Innovation	Frilasita A Yudhaputri et al
EPI_ISL_882940,EPI_ISL_882942	Ospedale San Camillo De Lellis Rieti	INMI Lazzaro Spallanzani IRCCS	M Rueca et al
EPI_ISL_492049,EPI_ISL_492087,EPI_ISL_492050,EPI_ISL_492051,EPI_ISL_492052,EPI_ISL_492053,EPI_ISL_492055,EPI_ISL_492056,EPI_ISL_492057,EPI_ISL_528485,EPI_ISL_528486,EPI_ISL_528487,EPI_ISL_492059,EPI_ISL_492060,EPI_ISL_528489,EPI_ISL_528490,EPI_ISL_528491,EPI_ISL_528492,EPI_ISL_528493,EPI_ISL_528494,EPI_ISL_528495,EPI_ISL_492061,EPI_ISL_528497,EPI_ISL_528498,EPI_ISL_528499,EPI_ISL_528500,EPI_ISL_5…	Alaska State Virology Laboratory	Alaska State Virology Laboratory	Chen J et al with Pathogenomics group Dagdag R et al
EPI_ISL_455742	Servicio de Microbiologia. Hospital Clinico Universitario de Valencia	Sequencing and Bioinformatics Service and Molecular Epidemiology Research Group. FISABIO-Public Health, and SeqCOVID-Spain Consortium	Neris Garcia-Gonzalez et al
[truncated: 4,135 more rows]
