# Supplementary material for: Insertions in SARS-CoV-2 genome caused by template switch and duplications give rise to new variants of potential concern
Source: Research Square preprint supplement (doi:10.21203/rs.3.rs-456574/v1), 2021-05-05
Supplement: Supplementary file 4 [file 9b797cef3c1203ae35c8c586.xlsx]

## Sheet: Supplemenatary Table 1
Position	Length	Insertion sequence	Type	Gene	Virus name	Sequence ID	Collection Date	Region	Sequencing technology	SRA	Lofreq Info
229	3	cat	Singleton	ORF10	hCoV-19/USA/WA-UW-10133/2020	EPI_ISL_511861	2020-05-29	North America		SRR12431033	Not confirmed
229	3	gca	Singleton	ORF10	hCoV-19/USA/WA-UW-10126/2020	EPI_ISL_511860	2020-05-29	North America		SRR12431025	Not confirmed
626	3	ttc	Multi	ORF1ab	hCoV-19/USA/UT-UPHL-2012566639/2020	EPI_ISL_746850	2020-12-03	North America	Illumina NextSeq	SRR13379694	DP=3501;AF=0.786632;SB=21;DP4=143,513,474,2280;INDEL;HRUN=2
626	3	ttc	Multi	ORF1ab	hCoV-19/England/MILK-A47188/2020	EPI_ISL_598504	2020-10-06	Europe	Illumina NovaSeq	ERR4763747	DP=15538;AF=0.800811;SB=0;DP4=0,2482,5,12438;INDEL;HRUN=2
626	3	ttc	Multi	ORF1ab	hCoV-19/USA/AK-PHL6665/2020	EPI_ISL_806843	2020-12-08	North America	Illumina MiSeq
690	3	caa	Multi	ORF1ab	hCoV-19/Northern_Ireland/NIRE-245BB1/2020	EPI_ISL_921044	2020-12-30	Europe		ERR5223206	Not confirmed
690	3	caa	Multi	ORF1ab	hCoV-19/Northern_Ireland/NIRE-245BC0/2020	EPI_ISL_921045	2020-12-30	Europe		ERR5229711	Not confirmed
1813	3	aaa	Multi	ORF1ab	hCoV-19/Spain/AR-IBV-98008038/2020	EPI_ISL_654441	2020-09-29	Europe	Illumina MiSeq
1813	3	aaa	Multi	ORF1ab	hCoV-19/USA/CA-CZB-5670/2020	EPI_ISL_583216	2020-07-28	North America	Illumina NovaSeq	SRR12833868	DP=7515;AF=0.767265;SB=588;DP4=389,256,1595,4171;INDEL;HRUN=6
1813	3	aaa	Multi	ORF1ab	hCoV-19/Spain/AR-IBV-98008041/2020	EPI_ISL_654443	2020-09-29	Europe	Illumina MiSeq
1813	3	aaa	Multi	ORF1ab	hCoV-19/Spain/AR-IBV-98008039/2020	EPI_ISL_654442	2020-09-29	Europe	Illumina MiSeq
1857	3	tcc	Singleton	ORF1ab	hCoV-19/England/ALDP-B74321/2020	EPI_ISL_662234	2020-11-12	Europe	Illumina NovaSeq	ERR4904889	DP=11420;AF=0.968389;SB=0;DP4=0,218,0,11059;INDEL;HRUN=1
3073	3	gaa	Multi	ORF1ab	hCoV-19/USA/CA-ALSR-1795/2020	EPI_ISL_512189	2020-05-12	North America	Illumina	SRR12351598	Not confirmed
3073	3	gaa	Multi	ORF1ab	hCoV-19/England/QEUH-A9FB65/2020	EPI_ISL_611305	2020-10-20	Europe	Illumina NovaSeq	ERR4793785	DP=5149;AF=0.718198;SB=0;DP4=0,1425,0,3698;INDEL;HRUN=1
3073	3	gaa	Multi	ORF1ab	hCoV-19/USA/CA-ALSR-2051/2020	EPI_ISL_635318	2020-05-11	North America	Illumina	SRR12351692	Not confirmed
3073	3	gaa	Multi	ORF1ab	hCoV-19/England/ALDP-10F6B63/2021	EPI_ISL_907500	2021-01-23	Europe	Illumina NovaSeq	ERR5233287	DP=852;AF=0.968310;SB=0;DP4=0,23,0,825;INDEL;HRUN=1
3073	3	gaa	Multi	ORF1ab	hCoV-19/USA/CA-ALSR-2050/2020	EPI_ISL_635317	2020-05-11	North America	Illumina
3073	3	gaa	Multi	ORF1ab	hCoV-19/USA/CA-ALSR-1276/2020	EPI_ISL_494474	2020-05-05	North America	Illumina
3073	3	gaa	Multi	ORF1ab	hCoV-19/England/MILK-C90D02/2020	EPI_ISL_777207	2020-12-10	Europe	Illumina NovaSeq	ERR5055186	DP=15540;AF=0.737838;SB=0;DP4=0,4038,0,11466;INDEL;HRUN=1
3073	3	gaa	Multi	ORF1ab	hCoV-19/USA/CA-ALSR-2053/2020	EPI_ISL_635320	2020-05-07	North America	Illumina
3073	3	gaa	Multi	ORF1ab	hCoV-19/England/MILK-C90B9F/2020	EPI_ISL_777304	2020-12-10	Europe	Illumina NovaSeq	ERR5055192	DP=4266;AF=0.966714;SB=0;DP4=0,127,0,4124;INDEL;HRUN=1
3073	3	tgt	Singleton	ORF1ab	hCoV-19/South_Korea/KDCA0838/2020	EPI_ISL_850661	2020-12-30	Asia
3354	3	tta	Singleton	ORF1ab	hCoV-19/England/QEUH-B1172A/2020	EPI_ISL_642267	2020-11-02	Europe	Illumina NovaSeq	ERR4849859	DP=7288;AF=0.920006;SB=208;DP4=111,298,3426,3279;INDEL;HRUN=2
3705	3	att	Singleton	ORF1ab	hCoV-19/USA/CA-QDX-3854/2021	EPI_ISL_906332	2021-01-08	North America	Illumina MiSeq	SRR13605844	Not confirmed
4013	3	agc	Singleton	ORF1ab	hCoV-19/Switzerland/GE-32990906/2021	EPI_ISL_897615	2021-01-17	Europe	Illumina NovaSeq
5957	3	att	Singleton	ORF1ab	hCoV-19/Australia/VIC10501/2020	EPI_ISL_562601	2020-08-07	Oceania	Illumina NextSeq 550	SRR12753291	DP=1661;AF=0.945214;SB=0;DP4=76,10,1400,170;INDEL;HRUN=2
6930	3	ttt	Singleton	ORF1ab	hCoV-19/England/ALDP-A670A3/2020	EPI_ISL_630461	2020-10-12	Europe	Illumina NovaSeq	ERR4826007	Not confirmed
9859	3	aag	Multi	ORF1ab	hCoV-19/United_Arab_Emirates/4288/2020	EPI_ISL_860056	2020-12-27	Asia
9859	3	aag	Multi	ORF1ab	hCoV-19/France/Bre-IPP00475/2021	EPI_ISL_861237	2021-01-09	Europe	Illumina NextSeq 500
11074	3	ttc	Multi	ORF1ab	hCoV-19/England/ALDP-952C7B/2020	EPI_ISL_555389	2020-06-11	Europe	Illumina NovaSeq	ERR4640864	DP=16937;AF=0.858653;SB=1282;DP4=1927,142,14542,1;INDEL;HRUN=2
11074	3	ttc	Multi	ORF1ab	hCoV-19/Denmark/DCGC-2321/2020	EPI_ISL_617658	2020-08-10	Europe	Nanopore MinION
11074	3	ttc	Multi	ORF1ab	hCoV-19/England/MILK-80D1BD/2020	EPI_ISL_557178	2020-07-13	Europe	Illumina NovaSeq	ERR4637527	DP=35637;AF=0.906474;SB=2147483647;DP4=2261,727,32288,16;INDEL;HRUN=2
11074	3	ttc	Multi	ORF1ab	hCoV-19/Germany/BW-FR0048/2020	EPI_ISL_852798	2020-03-11	Europe	Illumina MiSeq
11074	3	ttc	Multi	ORF1ab	hCoV-19/England/ALDP-95422C/2020	EPI_ISL_553798	2020-06-13	Europe		ERR4641993	DP=19603;AF=0.559761;SB=2147483647;DP4=4833,3385,10926,47;INDEL;HRUN=2
11074	3	ttc	Multi	ORF1ab	hCoV-19/Germany/BW-FR0168/2020	EPI_ISL_852787	2020-03-12	Europe	Illumina MiSeq
11074	3	ttc	Multi	ORF1ab	hCoV-19/Germany/BW-FR0050/2020	EPI_ISL_852796	2020-03-11	Europe	Illumina MiSeq
11074	3	ttc	Multi	ORF1ab	hCoV-19/England/ALDP-5C2542/2020	EPI_ISL_558745	2020-06-19	Europe	Illumina NovaSeq	ERR4633286	Not confirmed
11074	3	ttc	Multi	ORF1ab	hCoV-19/Germany/BW-FR0176/2020	EPI_ISL_852776	2020-03-18	Europe	Illumina MiSeq
11074	3	ttc	Multi	ORF1ab	hCoV-19/Germany/BW-FR0078/2020	EPI_ISL_852781	2020-03-16	Europe	Illumina MiSeq
11074	3	ttc	Multi	ORF1ab	hCoV-19/England/ALDP-70B086/2020	EPI_ISL_557563	2020-06-30	Europe		ERR4637387	DP=41118;AF=0.754730;SB=2147483647;DP4=8845,643,31018,15;INDEL;HRUN=2
11074	3	ttc	Multi	ORF1ab	hCoV-19/Germany/BW-FR0110/2020	EPI_ISL_852782	2020-03-16	Europe	Illumina MiSeq
11074	3	ttc	Multi	ORF1ab	hCoV-19/Germany/BW-FR0028/2020	EPI_ISL_852774	2020-03-19	Europe	Illumina MiSeq
11074	3	ttc	Multi	ORF1ab	hCoV-19/Germany/BW-FR0029/2020	EPI_ISL_852770	2020-03-23	Europe	Illumina MiSeq
11074	3	ttc	Multi	ORF1ab	hCoV-19/Germany/BW-FR0330/2020	EPI_ISL_852768	2020-03-28	Europe	Illumina MiSeq
11074	3	ttc	Multi	ORF1ab	hCoV-19/England/ALDP-B7396C/2020	EPI_ISL_664741	2020-11-12	Europe	Illumina	ERR4891064	DP=7840;AF=0.883929;SB=62;DP4=703,155,6114,816;INDEL;HRUN=2
11074	3	ttc	Multi	ORF1ab	hCoV-19/England/CAMC-B232E8/2020	EPI_ISL_647181	2020-11-02	Europe	Illumina NovaSeq	ERR4860553	DP=36676;AF=0.640637;SB=2147483647;DP4=7158,5629,23493,3;INDEL;HRUN=2
11074	3	ttc	Multi	ORF1ab	hCoV-19/Germany/BW-FR0024/2020	EPI_ISL_852800	2020-03-10	Europe	Illumina MiSeq
11074	3	ttc	Multi	ORF1ab	hCoV-19/Germany/BW-FR0081/2020	EPI_ISL_852775	2020-03-18	Europe	Illumina MiSeq
11074	3	ttc	Multi	ORF1ab	hCoV-19/England/ALDP-6C60B5/2020	EPI_ISL_556229	2020-07-02	Europe	Illumina NovaSeq	ERR4639435	DP=14148;AF=0.537037;SB=2147483647;DP4=893,5396,7006,592;INDEL;HRUN=2
11074	3	ttc	Multi	ORF1ab	hCoV-19/Germany/BW-FR0016/2020	EPI_ISL_852801	2020-03-10	Europe	Illumina MiSeq
11074	3	ttc	Multi	ORF1ab	hCoV-19/England/ALDP-9056B5/2020	EPI_ISL_551428	2020-06-24	Europe	Illumina NovaSeq	ERR4642337	DP=4772;AF=0.707251;SB=40;DP4=1215,7,3375,0;INDEL;HRUN=2
11074	3	ttc	Multi	ORF1ab	hCoV-19/England/ALDP-71DF66/2020	EPI_ISL_557639	2020-07-01	Europe	Illumina NovaSeq	ERR4637263	Not confirmed
11074	3	ttc	Multi	ORF1ab	hCoV-19/Germany/BW-FR0051/2020	EPI_ISL_852793	2020-03-11	Europe	Illumina MiSeq
11074	3	ttc	Multi	ORF1ab	hCoV-19/Germany/BW-FR0012/2020	EPI_ISL_852802	2020-03-08	Europe	Illumina MiSeq
11074	3	ttc	Multi	ORF1ab	hCoV-19/Germany/BW-FR0166/2020	EPI_ISL_852789	2020-03-11	Europe	Illumina MiSeq
11074	3	ttc	Multi	ORF1ab	hCoV-19/Germany/BW-FR0054/2020	EPI_ISL_852788	2020-03-11	Europe	Illumina MiSeq
11074	3	ttc	Multi	ORF1ab	hCoV-19/Germany/BW-FR0250/2020	EPI_ISL_852769	2020-03-25	Europe	Illumina MiSeq
11074	3	ttc	Multi	ORF1ab	hCoV-19/England/QEUH-B660A3/2020	EPI_ISL_655828	2020-11-10	Europe		ERR4973863	DP=15640;AF=0.674041;SB=2841;DP4=4272,545,10542,0;INDEL;HRUN=2
11074	3	ttc	Multi	ORF1ab	hCoV-19/Germany/BW-FR0190/2020	EPI_ISL_852771	2020-03-20	Europe	Illumina MiSeq
11074	3	ttc	Multi	ORF1ab	hCoV-19/Germany/BW-FR0018/2020	EPI_ISL_852785	2020-03-14	Europe	Illumina MiSeq
11074	3	ttc	Multi	ORF1ab	hCoV-19/Germany/BW-FR0030/2020	EPI_ISL_852762	2020-04-02	Europe	Illumina MiSeq
11074	3	ttc	Multi	ORF1ab	hCoV-19/Germany/BW-FR0026/2020	EPI_ISL_852795	2020-03-11	Europe	Illumina MiSeq
11074	3	ttc	Multi	ORF1ab	hCoV-19/Germany/BW-FR0111/2020	EPI_ISL_852763	2020-04-01	Europe	Illumina MiSeq
11074	3	ttc	Multi	ORF1ab	hCoV-19/Germany/BW-FR0076/2020	EPI_ISL_852772	2020-03-20	Europe	Illumina MiSeq
11074	3	ttc	Multi	ORF1ab	hCoV-19/Germany/BW-FR0032/2020	EPI_ISL_852779	2020-03-17	Europe	Illumina MiSeq
11074	3	ttc	Multi	ORF1ab	hCoV-19/Germany/BW-FR0337/2020	EPI_ISL_852766	2020-03-30	Europe	Illumina MiSeq
11074	3	ttc	Multi	ORF1ab	hCoV-19/Germany/BW-FR0021/2020	EPI_ISL_852783	2020-03-16	Europe	Illumina MiSeq
11074	3	ttc	Multi	ORF1ab	hCoV-19/Germany/BW-MVZ-LS-07/2020	EPI_ISL_640225	2020-04-08	Europe	Nanopore MinION
11074	3	ttc	Multi	ORF1ab	hCoV-19/Germany/BW-FR0049/2020	EPI_ISL_852797	2020-03-11	Europe	Illumina MiSeq
11074	3	ttc	Multi	ORF1ab	hCoV-19/England/ALDP-651BAF/2020	EPI_ISL_558182	2020-07-04	Europe	Illumina NovaSeq	ERR4633786	DP=31562;AF=0.769977;SB=2147483647;DP4=1909,4969,24284,18;INDEL;HRUN=2
11074	3	ttc	Multi	ORF1ab	hCoV-19/Germany/BW-FR0175/2020	EPI_ISL_852777	2020-03-17	Europe	Illumina MiSeq
11074	3	ttc	Multi	ORF1ab	hCoV-19/Denmark/DCGC-3861/2020	EPI_ISL_622733	2020-08-24	Europe	Nanopore MinION
11074	3	ttc	Multi	ORF1ab	hCoV-19/England/ALDP-5D65C3/2020	EPI_ISL_558417	2020-06-19	Europe	Illumina NovaSeq	ERR4633683	Not confirmed
11074	3	ttc	Multi	ORF1ab	hCoV-19/Germany/BW-FR0165/2020	EPI_ISL_852791	2020-03-11	Europe	Illumina MiSeq
11074	3	ttc	Multi	ORF1ab	hCoV-19/Germany/BW-FR0077/2020	EPI_ISL_852784	2020-03-15	Europe	Illumina MiSeq
11074	3	ttc	Multi	ORF1ab	hCoV-19/Germany/BW-FR0164/2020	EPI_ISL_852794	2020-03-11	Europe	Illumina MiSeq
11074	3	ttc	Multi	ORF1ab	hCoV-19/Germany/BW-FR0333/2020	EPI_ISL_852767	2020-03-29	Europe	Illumina MiSeq
11074	3	ttc	Multi	ORF1ab	hCoV-19/Germany/BW-FR0086/2020	EPI_ISL_852765	2020-03-30	Europe	Illumina MiSeq
11074	3	ttc	Multi	ORF1ab	hCoV-19/Germany/BW-FR0339/2020	EPI_ISL_852764	2020-03-30	Europe	Illumina MiSeq
11074	3	ttc	Multi	ORF1ab	hCoV-19/Germany/BW-FR0019/2020	EPI_ISL_852786	2020-03-14	Europe	Illumina MiSeq
11074	3	ttc	Multi	ORF1ab	hCoV-19/England/ALDP-6C0CE4/2020	EPI_ISL_557805	2020-07-02	Europe	Illumina NovaSeq	ERR4637112	DP=24945;AF=0.739467;SB=1126;DP4=5891,199,18441,5;INDEL;HRUN=2
11074	3	ttc	Multi	ORF1ab	hCoV-19/Germany/BW-FR0089/2020	EPI_ISL_852792	2020-03-11	Europe	Illumina MiSeq
11074	3	ttc	Multi	ORF1ab	hCoV-19/Germany/BW-FR0025/2020	EPI_ISL_852799	2020-03-11	Europe	Illumina MiSeq
11074	3	ttc	Multi	ORF1ab	hCoV-19/England/ALDP-94EC09/2020	EPI_ISL_556466	2020-06-17	Europe	Illumina NovaSeq	ERR4639167	DP=10440;AF=0.921169;SB=58;DP4=632,6,9615,2;INDEL;HRUN=2
11074	3	ttc	Multi	ORF1ab	hCoV-19/Germany/BW-FR0091/2020	EPI_ISL_852773	2020-03-19	Europe	Illumina MiSeq
11074	3	ttc	Multi	ORF1ab	hCoV-19/England/ALDP-95A1FC/2020	EPI_ISL_553499	2020-06-09	Europe	Illumina NovaSeq	ERR4642460	DP=14897;AF=0.889172;SB=2524;DP4=1140,242,13244,2;INDEL;HRUN=2
11074	3	ttc	Multi	ORF1ab	hCoV-19/Germany/BW-FR0080/2020	EPI_ISL_852778	2020-03-17	Europe	Illumina MiSeq
11074	3	ttc	Multi	ORF1ab	hCoV-19/England/CAMC-945947/2020	EPI_ISL_556801	2020-07-15	Europe	Illumina NovaSeq	ERR4638393	DP=36864;AF=0.928575;SB=887;DP4=2209,83,34222,9;INDEL;HRUN=2
11074	3	ttc	Multi	ORF1ab	hCoV-19/Wales/ALDP-B1E22C/2020	EPI_ISL_710942	2020-11-01	Europe	Illumina NovaSeq
11074	3	ttc	Multi	ORF1ab	hCoV-19/England/ALDP-92156B/2020	EPI_ISL_553320	2020-06-23	Europe	Illumina NovaSeq
11074	3	ttc	Multi	ORF1ab	hCoV-19/England/LOND-126085C/2020	EPI_ISL_524640	2020-04-05	Europe
11074	3	ttc	Multi	ORF1ab	hCoV-19/Belgium/MBLG64071/2020	EPI_ISL_949246	2020-03-30	Europe
11074	3	ttc	Multi	ORF1ab	hCoV-19/France/ARA-SC113/2020	EPI_ISL_700377	2020-03-28	Europe
11074	3	ttc	Multi	ORF1ab	hCoV-19/England/ALDP-651AEE/2020	EPI_ISL_558042	2020-07-04	Europe	Illumina NovaSeq
11074	3	ttc	Multi	ORF1ab	hCoV-19/Germany/BW-FR0174/2020	EPI_ISL_852780	2020-03-17	Europe	Illumina MiSeq
11074	3	ttc	Multi	ORF1ab	hCoV-19/England/ALDP-692BFD/2020	EPI_ISL_558187	2020-07-02	Europe	Illumina NovaSeq
11074	3	ttc	Multi	ORF1ab	hCoV-19/England/ALDP-94EF3D/2020	EPI_ISL_556283	2020-06-17	Europe	Illumina NovaSeq
11074	3	ttc	Multi	ORF1ab	hCoV-19/Germany/BW-FR0027/2020	EPI_ISL_852790	2020-03-11	Europe	Illumina MiSeq
11074	3	ttc	Multi	ORF1ab	hCoV-19/England/ALDP-954FE9/2020	EPI_ISL_553608	2020-06-11	Europe	Illumina NovaSeq
11074	3	ttt	Multi	ORF1ab	hCoV-19/England/CAMB-1ADF07/2020	EPI_ISL_459413	2020-04-26	Europe	Illumina NovaSeq	ERR4461882	Not confirmed
11074	3	ttt	Multi	ORF1ab	hCoV-19/Wales/PHWC-15C6B7/2020	EPI_ISL_472523	2020-05-09	Europe	Illumina
11074	3	ttt	Multi	ORF1ab	hCoV-19/Wales/PHWC-163811/2020	EPI_ISL_474001	2020-05-09	Europe	Illumina
11074	3	ttt	Multi	ORF1ab	hCoV-19/England/MILK-9AAE32/2020	EPI_ISL_551158	2020-08-26	Europe	Illumina NovaSeq
11074	3	ttt	Multi	ORF1ab	hCoV-19/Australia/NSW2110/2020	EPI_ISL_678299	2020-03-22	Oceania	Illumina MiSeq
11074	3	ttt	Multi	ORF1ab	hCoV-19/England/MILK-B8F2CC/2020	EPI_ISL_675260	2020-11-13	Europe	Illumina NovaSeq	ERR4907096	DP=24145;AF=0.643570;SB=2147483647;DP4=273,4000,15539,0;INDEL;HRUN=8
11074	3	ttt	Multi	ORF1ab	hCoV-19/Wales/PHWC-16094E/2020	EPI_ISL_472996	2020-05-25	Europe	Illumina
11074	3	ttt	Multi	ORF1ab	hCoV-19/Wales/PHWC-15E020/2020	EPI_ISL_472787	2020-05-15	Europe	Illumina
11074	3	ttt	Multi	ORF1ab	hCoV-19/England/CAMC-B79E76/2020	EPI_ISL_741055	2020-11-09	Europe	Illumina
11074	3	ttt	Multi	ORF1ab	hCoV-19/Wales/PHWC-25B6E/2020	EPI_ISL_422063	2020-03-25	Europe
11074	3	ttt	Multi	ORF1ab	hCoV-19/England/20130049804/2020	EPI_ISL_423621	2020-03-23	Europe	Illumina NextSeq
11074	3	ttt	Multi	ORF1ab	hCoV-19/Australia/VIC751/2020	EPI_ISL_427028	2020-03-30	Oceania	Illumina NextSeq 550	SRR11578374	Not confirmed
11074	3	ttt	Multi	ORF1ab	hCoV-19/Australia/VIC681/2020	EPI_ISL_426976	2020-03-27	Oceania	Illumina NextSeq 550	SRR11578113	Not confirmed
11074	3	ttt	Multi	ORF1ab	hCoV-19/England/ALDP-C23162/2020	EPI_ISL_733795	2020-12-06	Europe	Illumina NovaSeq	ERR5037817	Not confirmed
11074	3	ttt	Multi	ORF1ab	hCoV-19/Israel/CVL-964ngs/2020	EPI_ISL_889278	2020-12-31	Asia	Illumina MiSeq
11074	3	ttt	Multi	ORF1ab	hCoV-19/England/ALDP-953928/2020	EPI_ISL_553805	2020-06-13	Europe	Illumina NovaSeq
11074	3	ttt	Multi	ORF1ab	hCoV-19/Jordan/AQ-ALSR-5247/2020	EPI_ISL_730485	2020-10-15	Asia	Illumina
11074	3	ttt	Multi	ORF1ab	hCoV-19/England/BRIS-12CCFA/2020	EPI_ISL_481796	2020-04-18	Europe	Illumina NovaSeq	ERR4422774	Not confirmed
11074	3	ttt	Multi	ORF1ab	hCoV-19/USA/ID-USAFSAM-S303/2020	EPI_ISL_812619	2020-08-18	North America	Illumina MiSeq
11074	3	ttt	Multi	ORF1ab	hCoV-19/England/QEUH-BA19B0/2020	EPI_ISL_719752	2020-11-18	Europe	Illumina NovaSeq	ERR5025207	Not confirmed
11074	3	ttt	Multi	ORF1ab	hCoV-19/Jordan/AM-ALSR-4964/2020	EPI_ISL_730237	2020-10-03	Asia	Illumina
11074	3	ttt	Multi	ORF1ab	hCoV-19/England/QEUH-B3200A/2020	EPI_ISL_646411	2020-11-04	Europe	Illumina NovaSeq	ERR4861640	DP=19869;AF=0.637979;SB=2147483647;DP4=403,9580,12676,0;INDEL;HRUN=8
11074	3	ttt	Multi	ORF1ab	hCoV-19/England/BRIS-12D549/2020	EPI_ISL_481934	2020-05-04	Europe	Illumina NovaSeq
11074	3	ttt	Multi	ORF1ab	hCoV-19/Wales/PHWC-15E0F3/2020	EPI_ISL_472794	2020-05-13	Europe	Illumina
11074	3	ttt	Multi	ORF1ab	hCoV-19/USA/WA-UW-22460/2020	EPI_ISL_570578	2020-08-05	North America	Illumina
11074	3	ttt	Multi	ORF1ab	hCoV-19/England/BRIS-127239/2020	EPI_ISL_469614	2020-04-24	Europe	Illumina NovaSeq
11074	3	ttt	Multi	ORF1ab	hCoV-19/USA/ME-HETL-J1134/2021	EPI_ISL_937445	2021-01-11	North America	Illumina NextSeq
11074	3	ttt	Multi	ORF1ab	hCoV-19/England/BRIS-129510/2020	EPI_ISL_458836	2020-04-19	Europe	Illumina NovaSeq
11074	3	ttt	Multi	ORF1ab	hCoV-19/England/NORW-E9094/2020	EPI_ISL_461816	2020-04-29	Europe	Illumina
11074	3	ttt	Multi	ORF1ab	hCoV-19/England/BRIS-12E6DC/2020	EPI_ISL_488235	2020-04-21	Europe	Illumina NovaSeq
11074	3	ttt	Multi	ORF1ab	hCoV-19/Australia/NSW66/2020	EPI_ISL_427646	2020-03-05	Oceania	Illumina iSeq
11074	3	ttt	Multi	ORF1ab	hCoV-19/England/QEUH-A1F480/2020	EPI_ISL_587526	2020-10-01	Europe	Illumina NovaSeq
11074	3	ttt	Multi	ORF1ab	hCoV-19/India/WB-IK17/2020	EPI_ISL_508346	2020-04-24	Asia	Illumina NovaSeq
11074	3	ttt	Multi	ORF1ab	hCoV-19/England/204381381/2020	EPI_ISL_649863	2020-10-23	Europe	Illumina NextSeq
11074	3	ttt	Multi	ORF1ab	hCoV-19/Wales/PHWC-164704/2020	EPI_ISL_474220	2020-05-07	Europe	Illumina
11074	3	ttt	Multi	ORF1ab	hCoV-19/Jordan/SEARCH-5444/2020	EPI_ISL_755124	2020-08-24	Asia	Illumina
11074	3	ttt	Multi	ORF1ab	hCoV-19/England/MILK-956CD1/2020	EPI_ISL_554261	2020-06-09	Europe	Illumina NovaSeq	ERR4641075	Not confirmed
11074	3	ttt	Multi	ORF1ab	hCoV-19/England/MILK-971836/2020	EPI_ISL_553032	2020-08-18	Europe	Illumina NovaSeq
11074	3	ttt	Multi	ORF1ab	hCoV-19/England/20132027704/2020	EPI_ISL_423766	2020-03-23	Europe	Illumina NextSeq
11074	3	ttt	Multi	ORF1ab	hCoV-19/Australia/VIC895/2020	EPI_ISL_427147	2020-04-06	Oceania	Illumina NextSeq 500
11074	3	ttt	Multi	ORF1ab	hCoV-19/England/MILK-956CE0/2020	EPI_ISL_554118	2020-06-10	Europe	Illumina NovaSeq
11074	3	ttt	Multi	ORF1ab	hCoV-19/Jordan/IR-ALSR-5232/2020	EPI_ISL_730470	2020-10-18	Asia	Illumina
11074	3	ttt	Multi	ORF1ab	hCoV-19/England/20180037704/2020	EPI_ISL_465438	2020-04-27	Europe	Illumina NextSeq
11074	3	ttt	Multi	ORF1ab	hCoV-19/Scotland/EDB3221/2020	EPI_ISL_488989	2020-04-06	Europe	Illumina NovaSeq
11074	3	ttt	Multi	ORF1ab	hCoV-19/USA/MA-MASPHL-01310/2020	EPI_ISL_876108	2020-12-15	North America	Illumina Miseq
11074	3	ttt	Multi	ORF1ab	hCoV-19/Australia/NSW31/2020	EPI_ISL_417392	2020-03-10	Oceania	Illumina iSeq
11074	3	ttt	Multi	ORF1ab	hCoV-19/Australia/VIC683/2020	EPI_ISL_426978	2020-03-29	Oceania	Illumina NextSeq 550
11074	3	ttt	Multi	ORF1ab	hCoV-19/England/ALDP-5C51E1/2020	EPI_ISL_558439	2020-06-17	Europe	Illumina NovaSeq
11074	3	ttt	Multi	ORF1ab	hCoV-19/Scotland/GCVR-1717B9/2020	EPI_ISL_489612	2020-03-28	Europe	Illumina NovaSeq
11074	3	ttt	Multi	ORF1ab	hCoV-19/England/BRIS-125E37/2020	EPI_ISL_443716	2020-03-30	Europe	Illumina NovaSeq
11074	3	ttt	Multi	ORF1ab	hCoV-19/Spain/AR-IBV-005043/2020	EPI_ISL_510346	2020-04-20	Europe	Illumina MiSeq
11074	3	ttt	Multi	ORF1ab	hCoV-19/England/BRIS-124788/2020	EPI_ISL_443742	2020-03-25	Europe	Illumina NovaSeq
11074	3	ttt	Multi	ORF1ab	hCoV-19/England/CAMC-B77A38/2020	EPI_ISL_783429	2020-11-09	Europe	Illumina NovaSeq
11074	3	ttt	Multi	ORF1ab	hCoV-19/Wales/PHWC-493D9E/2020	EPI_ISL_726023	2020-11-20	Europe	Illumina
11074	3	ttt	Multi	ORF1ab	hCoV-19/Israel/CVL-2408/2021	EPI_ISL_944228	2021-01-13	Asia	Illumina MiSeq
11074	3	ttt	Multi	ORF1ab	hCoV-19/Scotland/EDB6413/2020	EPI_ISL_487842	2020-04-13	Europe	Illumina NovaSeq
11074	3	ttt	Multi	ORF1ab	hCoV-19/England/BRIS-1253ED/2020	EPI_ISL_443996	2020-03-28	Europe	Illumina NovaSeq
11074	3	ttt	Multi	ORF1ab	hCoV-19/Scotland/CVR3405/2020	EPI_ISL_456829	2020-05-06	Europe	Illumina
11074	3	ttt	Multi	ORF1ab	hCoV-19/England/CAMB-78D0C/2020	EPI_ISL_441273	2020-04-03	Europe	Illumina NovaSeq
11074	3	ttt	Multi	ORF1ab	hCoV-19/Wales/PHWC-369F7/2020	EPI_ISL_474745	2020-04-24	Europe	Illumina
11074	3	ttt	Multi	ORF1ab	hCoV-19/USA/KS-KHEL-0006/2020	EPI_ISL_875680	2020-03-17	North America	iSeq
11074	3	ttt	Multi	ORF1ab	hCoV-19/USA/AK-PHL6591/2020	EPI_ISL_911684	2020-12-14	North America	Illumina MiSeq
11074	3	ttt	Multi	ORF1ab	hCoV-19/Malaysia/2297/2020	EPI_ISL_501193	2020-03-27	Asia	Illumina iSeq
11074	3	ttt	Multi	ORF1ab	hCoV-19/Wales/PHWC-160577/2020	EPI_ISL_472950	2020-05-19	Europe	Illumina
11074	3	ttt	Multi	ORF1ab	hCoV-19/Wales/PHWC-1652B7/2020	EPI_ISL_479445	2020-04-20	Europe	Illumina
11074	3	ttt	Multi	ORF1ab	hCoV-19/England/ALDP-BB9C34/2020	EPI_ISL_702460	2020-11-21	Europe	Illumina NovaSeq	ERR4990117	Not confirmed
11074	3	ttt	Multi	ORF1ab	hCoV-19/Wales/PHWC-15E363/2020	EPI_ISL_472807	2020-05-15	Europe	Illumina
11074	3	ttt	Multi	ORF1ab	hCoV-19/Canada/QC-LSPQ-L00234922/2020	EPI_ISL_536081	2020-03-24	North America	Illumina NexteraFlex
11074	3	ttt	Multi	ORF1ab	hCoV-19/Wales/PHWC-168515/2020	EPI_ISL_494251	2020-04-17	Europe	Illumina
11074	3	ttt	Multi	ORF1ab	hCoV-19/England/20124095802/2020	EPI_ISL_418731	2020-03-13	Europe	Illumina NextSeq
11074	3	ttt	Multi	ORF1ab	hCoV-19/Equatorial_Guinea/25536/2020	EPI_ISL_648370	2020-06-25	Africa
11074	3	ttt	Multi	ORF1ab	hCoV-19/Portugal/PT0534/2020	EPI_ISL_454258	2020-04-07	Europe	Illumina NextSeq 550
11074	3	ttt	Multi	ORF1ab	hCoV-19/USA/NY-NYCPHL-001128/2020	EPI_ISL_671711	2020-10-26	North America	Illumina MiSeq
11074	3	ttt	Multi	ORF1ab	hCoV-19/England/ALDP-B1B939/2020	EPI_ISL_645601	2020-11-01	Europe	Illumina NovaSeq
11074	3	ttt	Multi	ORF1ab	hCoV-19/Scotland/CVR3664/2020	EPI_ISL_473750	2020-05-22	Europe	Illumina
11074	3	ttt	Multi	ORF1ab	hCoV-19/Australia/VIC615/2020	EPI_ISL_426870	2020-03-28	Oceania	Illumina NextSeq 500
11074	3	ttt	Multi	ORF1ab	hCoV-19/Wales/PHWC-15CC1F/2020	EPI_ISL_472597	2020-05-05	Europe	Illumina
11074	3	ttt	Multi	ORF1ab	hCoV-19/Iceland/4409/2020	EPI_ISL_828101	2020-11-06	Europe	Illumina Miseq
11074	3	ttt	Multi	ORF1ab	hCoV-19/England/MILK-B8DD45/2020	EPI_ISL_674515	2020-11-13	Europe	Illumina NovaSeq
11074	3	ttt	Multi	ORF1ab	hCoV-19/England/201180067/2020	EPI_ISL_464879	2020-03-12	Europe	Illumina NextSeq
11074	3	ttt	Multi	ORF1ab	hCoV-19/England/MILK-99518C/2020	EPI_ISL_552283	2020-08-24	Europe	Illumina NovaSeq
11074	3	ttt	Multi	ORF1ab	hCoV-19/England/CAMC-A82989/2020	EPI_ISL_610782	2020-10-12	Europe	Illumina NovaSeq
11074	3	ttt	Multi	ORF1ab	hCoV-19/Jordan/IR-ALSR-5200/2020	EPI_ISL_730438	2020-10-18	Asia	Illumina
11074	3	ttt	Multi	ORF1ab	hCoV-19/DRC/2819/2020	EPI_ISL_437347	2020-04-16	Africa	Illumina MiSeq
11074	3	ttt	Multi	ORF1ab	hCoV-19/Australia/NSW65/2020	EPI_ISL_427645	2020-03-04	Oceania	Illumina iSeq
11074	3	ttt	Multi	ORF1ab	hCoV-19/England/CAMB-82EEE/2020	EPI_ISL_443363	2020-04-14	Europe	Illumina NovaSeq
11074	3	ttt	Multi	ORF1ab	hCoV-19/Australia/NSW1168/2020	EPI_ISL_639736	2020-10-21	Oceania	Illumina iSeq
11074	3	ttt	Multi	ORF1ab	hCoV-19/Cambodia/2099/2020	EPI_ISL_956390	2020-03-15	Asia	Illumina MiSeq
11074	3	ttt	Multi	ORF1ab	hCoV-19/Switzerland/ZH-UZH-1000477102/2020	EPI_ISL_413019	2020-02-26	Europe	Illumina MiSeq
11074	3	ttt	Multi	ORF1ab	hCoV-19/Australia/NSW2099/2020	EPI_ISL_678297	2020-03-21	Oceania	Illumina MiSeq
11074	3	ttt	Multi	ORF1ab	hCoV-19/Wales/PHWC-1653F0/2020	EPI_ISL_479462	2020-04-21	Europe	Illumina
11074	3	ttt	Multi	ORF1ab	hCoV-19/Australia/NSW252/2020	EPI_ISL_451517	2020-03-08	Oceania	Illumina iSeq
11074	3	ttt	Multi	ORF1ab	hCoV-19/England/LOND-1250628/2020	EPI_ISL_664742	2020-03-23	Europe	Illumina
11074	3	ttt	Multi	ORF1ab	hCoV-19/Wales/PHWC-4B218E/2020	EPI_ISL_840712	2020-12-18	Europe	Illumina
11074	3	ttt	Multi	ORF1ab	hCoV-19/England/ALDP-B5B988/2020	EPI_ISL_655379	2020-11-08	Europe	Illumina NovaSeq
11074	3	ttt	Multi	ORF1ab	hCoV-19/Jordan/SR-042/2020	EPI_ISL_430000	2020-03-30	Asia	Illumina
11074	3	ttt	Multi	ORF1ab	hCoV-19/England/20124095904/2020	EPI_ISL_465791	2020-03-13	Europe	Illumina NextSeq
11074	3	ttt	Multi	ORF1ab	hCoV-19/England/MILK-957F7D/2020	EPI_ISL_554793	2020-06-11	Europe	Illumina NovaSeq
11074	3	ttt	Multi	ORF1ab	hCoV-19/Spain/AR-IBV-005086/2020	EPI_ISL_510369	2020-04-23	Europe	Illumina MiSeq
11074	3	ttt	Multi	ORF1ab	hCoV-19/Wales/PHWC-16872E/2020	EPI_ISL_494278	2020-04-20	Europe	Illumina
11074	3	ttt	Multi	ORF1ab	hCoV-19/Northern_Ireland/NIRE-245BB1/2020	EPI_ISL_921044	2020-12-30	Europe
11074	3	ttt	Multi	ORF1ab	hCoV-19/England/20124001702/2020	EPI_ISL_418685	2020-03-17	Europe	Illumina NextSeq
11074	3	ttt	Multi	ORF1ab	hCoV-19/Wales/PHWC-160C54/2020	EPI_ISL_473032	2020-05-18	Europe	Illumina
11074	3	ttt	Multi	ORF1ab	hCoV-19/USA/KS-KHEL-0010/2020	EPI_ISL_875684	2020-03-21	North America	iSeq
11074	3	ttt	Multi	ORF1ab	hCoV-19/England/LOND-128695D/2020	EPI_ISL_842796	2020-05-18	Europe	Illumina
11074	3	ttt	Multi	ORF1ab	hCoV-19/England/BRIS-127F50/2020	EPI_ISL_469728	2020-04-18	Europe	Illumina NovaSeq
11074	3	ttt	Multi	ORF1ab	hCoV-19/England/QEUH-C1453B/2020	EPI_ISL_709541	2020-12-06	Europe	Illumina NovaSeq
11074	3	ttt	Multi	ORF1ab	hCoV-19/Wales/PHWC-15D13D/2020	EPI_ISL_472671	2020-05-06	Europe	Illumina
11074	3	ttt	Multi	ORF1ab	hCoV-19/Australia/VIC2129/2020	EPI_ISL_480728	2020-06-19	Oceania	Illumina NextSeq 500
11074	3	ttt	Multi	ORF1ab	hCoV-19/England/LIVE-A7548/2020	EPI_ISL_517035	2020-03-28	Europe	Illumina
11074	3	ttt	Multi	ORF1ab	hCoV-19/Scotland/EDB5709/2020	EPI_ISL_487973	2020-04-12	Europe	Illumina NovaSeq
11074	3	ttt	Multi	ORF1ab	hCoV-19/Scotland/QEUH-A0BCCB/2020	EPI_ISL_599378	2020-10-03	Europe	Illumina NovaSeq
11074	3	ttt	Multi	ORF1ab	hCoV-19/Spain/AR-IBV-2385/2020	EPI_ISL_468838	2020-03-23	Europe	Illumina MiSeq
11074	3	ttt	Multi	ORF1ab	hCoV-19/Argentina/PAIS-F0028/2020	EPI_ISL_964913	2020-08-02	South America	Illumina MiSeq
11074	3	ttt	Multi	ORF1ab	hCoV-19/England/ALDP-AA1E85/2020	EPI_ISL_624222	2020-10-22	Europe	Illumina NovaSeq
11074	3	ttt	Multi	ORF1ab	hCoV-19/England/MILK-D6B992/2020	EPI_ISL_798340	2020-12-25	Europe	Illumina NovaSeq
11074	3	ttt	Multi	ORF1ab	hCoV-19/Scotland/GCVR-17028C/2020	EPI_ISL_459566	2020-03-24	Europe	Illumina NovaSeq
11074	3	ttt	Multi	ORF1ab	hCoV-19/USA/AZ-USAFSAM-S249/2020	EPI_ISL_812582	2020-08-03	North America	Illumina MiSeq
11074	3	ttt	Multi	ORF1ab	hCoV-19/England/CAMB-81447/2020	EPI_ISL_443065	2020-04-10	Europe	Illumina NovaSeq
11074	3	ttt	Multi	ORF1ab	hCoV-19/England/NORT-2968E7/2020	EPI_ISL_488041	2020-04-27	Europe	Illumina NovaSeq
11074	3	ttt	Multi	ORF1ab	hCoV-19/USA/TX-QDX-2554/2020	EPI_ISL_604843	2020-03-14	North America	Illumina MiSeq
11074	3	ttt	Multi	ORF1ab	hCoV-19/Iceland/3182/2020	EPI_ISL_826875	2020-10-06	Europe	Illumina Miseq
11074	3	ttt	Multi	ORF1ab	hCoV-19/Spain/MD-IBV-99008721/2020	EPI_ISL_654277	2020-10-16	Europe	Illumina MiSeq
11074	3	ttt	Multi	ORF1ab	hCoV-19/England/MILK-596C15/2020	EPI_ISL_558249	2020-06-11	Europe	Illumina NovaSeq
11074	3	ttt	Multi	ORF1ab	hCoV-19/Mayotte/IPP01002/2021	EPI_ISL_909674	2021-01-14	Africa	Illumina NextSeq 500
11074	3	ttt	Multi	ORF1ab	hCoV-19/Japan/PG-5744/2020	EPI_ISL_688616	2020-08-00	Asia	Illumina NextSeq500
11074	3	ttt	Multi	ORF1ab	hCoV-19/England/CAMC-B37409/2020	EPI_ISL_645434	2020-11-05	Europe	Illumina NovaSeq
11074	3	ttt	Multi	ORF1ab	hCoV-19/Wales/PHWC-1634B3/2020	EPI_ISL_473303	2020-05-06	Europe	Illumina
11074	3	ttt	Multi	ORF1ab	hCoV-19/England/MILK-992DF4/2020	EPI_ISL_551935	2020-08-26	Europe	Illumina NovaSeq
11074	3	ttt	Multi	ORF1ab	hCoV-19/England/QEUH-B80568/2020	EPI_ISL_661862	2020-11-14	Europe	Illumina NovaSeq
11074	3	ttt	Multi	ORF1ab	hCoV-19/Australia/VIC179/2020	EPI_ISL_419876	2020-03-19	Oceania	Illumina NextSeq 550
11074	3	ttt	Multi	ORF1ab	hCoV-19/England/MILK-993DA8/2020	EPI_ISL_552279	2020-08-27	Europe	Illumina NovaSeq
11074	3	ttt	Multi	ORF1ab	hCoV-19/Wales/PHWC-15C198/2020	EPI_ISL_472447	2020-04-20	Europe	Illumina
11074	3	ttt	Multi	ORF1ab	hCoV-19/England/BRIS-123376/2020	EPI_ISL_442696	2020-04-05	Europe	Illumina NovaSeq
11074	3	ttt	Multi	ORF1ab	hCoV-19/England/MILK-B54E9F/2020	EPI_ISL_657975	2020-11-06	Europe	Illumina NovaSeq
11074	3	ttt	Multi	ORF1ab	hCoV-19/Wales/PHWC-1645FB/2020	EPI_ISL_474203	2020-05-08	Europe	Illumina
11074	3	ttt	Multi	ORF1ab	hCoV-19/England/CAMB-759B0/2020	EPI_ISL_438282	2020-03-31	Europe	Illumina NovaSeq
11074	3	ttt	Multi	ORF1ab	hCoV-19/Thailand/Bangkok-CONI-0436/2021	EPI_ISL_882776	2021-01-14	Asia	Illumina Miseq, 2 x 250bp paired end reads, ARTIC V3, Nextera Flex prep
11074	3	ttt	Multi	ORF1ab	hCoV-19/Wales/PHWC-164A0B/2020	EPI_ISL_479334	2020-05-08	Europe	Illumina
11074	3	ttt	Multi	ORF1ab	hCoV-19/England/MILK-ACBF19/2020	EPI_ISL_629181	2020-10-19	Europe	Illumina NovaSeq
11074	3	ttt	Multi	ORF1ab	hCoV-19/England/NORT-283DFD/2020	EPI_ISL_488637	2020-04-04	Europe	Illumina NovaSeq
11074	3	ttt	Multi	ORF1ab	hCoV-19/Austria/CeMM1556/2020	EPI_ISL_854252	2020-11-04	Europe	Illumina NovaSeq
11074	3	ttt	Multi	ORF1ab	hCoV-19/Wales/PHWC-1638D5/2020	EPI_ISL_474013	2020-05-10	Europe	Illumina
11074	3	ttt	Multi	ORF1ab	hCoV-19/United_Arab_Emirates/L068/2020	EPI_ISL_435120	2020-03-14	Asia
11074	3	ttt	Multi	ORF1ab	hCoV-19/USA/NY-NYCPHL-000041/2020	EPI_ISL_631536	2020-03-08	North America	Illumina MiSeq
11074	3	ttt	Multi	ORF1ab	hCoV-19/England/CAMC-B218AC/2020	EPI_ISL_647419	2020-11-01	Europe
11074	3	ttt	Multi	ORF1ab	hCoV-19/Wales/PHWC-15CFBC/2020	EPI_ISL_472650	2020-05-08	Europe	Illumina
11074	3	ttt	Multi	ORF1ab	hCoV-19/Wales/PHWC-1600C1/2020	EPI_ISL_472894	2020-05-20	Europe	Illumina
11074	3	ttt	Multi	ORF1ab	hCoV-19/Northern_Ireland/NIRE-106CC9/2020	EPI_ISL_500981	2020-05-19	Europe
11074	3	ttt	Multi	ORF1ab	hCoV-19/Wales/PHWC-35FD8/2020	EPI_ISL_474603	2020-04-27	Europe	Illumina
11074	3	ttt	Multi	ORF1ab	hCoV-19/Australia/VIC13880/2020	EPI_ISL_561843	2020-03-29	Oceania	Illumina NextSeq 550
11074	3	ttt	Multi	ORF1ab	hCoV-19/England/205340566/2020	EPI_ISL_837043	2020-12-29	Europe	Illumina NextSeq
11074	3	ttt	Multi	ORF1ab	hCoV-19/England/20134020004/2020	EPI_ISL_423108	2020-03-23	Europe	Illumina NextSeq
11074	3	ttt	Multi	ORF1ab	hCoV-19/Slovenia/V0-571/2020	EPI_ISL_635293	2020-03-27	Europe	Illumina MiSeq
11074	3	ttt	Multi	ORF1ab	hCoV-19/England/ALDP-B244A5/2020	EPI_ISL_647049	2020-11-04	Europe	Illumina NovaSeq
11074	3	ttt	Multi	ORF1ab	hCoV-19/England/MILK-B8F332/2020	EPI_ISL_675134	2020-11-13	Europe	Illumina NovaSeq
11074	3	ttt	Multi	ORF1ab	hCoV-19/England/ALDP-599A72/2020	EPI_ISL_558291	2020-06-08	Europe	Illumina NovaSeq
11074	3	ttt	Multi	ORF1ab	hCoV-19/Australia/QLD1340/2020	EPI_ISL_849683	2020-07-24	Oceania	Illumina
11074	3	ttt	Multi	ORF1ab	hCoV-19/England/CAMB-7970D/2020	EPI_ISL_441148	2020-04-04	Europe	Illumina NovaSeq
11074	3	ttt	Multi	ORF1ab	hCoV-19/USA/MA-MASPHL-01027/2020	EPI_ISL_692784	2020-11-05	North America	Illumina MiSeq
11074	3	ttt	Multi	ORF1ab	hCoV-19/England/CAMC-B542C0/2020	EPI_ISL_656767	2020-11-08	Europe	Illumina NovaSeq
11074	3	ttt	Multi	ORF1ab	hCoV-19/Japan/PG-10807/2020	EPI_ISL_901490	2020-10-00	Asia	illumina iSeq
11074	3	ttt	Multi	ORF1ab	hCoV-19/USA/CO-CDPHE-2100030884/2020	EPI_ISL_771223	2020-11-25	North America	Illumina Miseq
11074	3	ttt	Multi	ORF1ab	hCoV-19/USA/GA-QDX-4509/2020	EPI_ISL_937055	2020-10-11	North America	Illumina MiSeq
11074	3	ttt	Multi	ORF1ab	hCoV-19/England/QEUH-9B9D33/2020	EPI_ISL_549734	2020-09-09	Europe	Illumina NovaSeq
11074	3	ttt	Multi	ORF1ab	hCoV-19/USA/TX-DSHS-0826/2020	EPI_ISL_593569	2020-06-03	North America	Illumina MiSeq
11074	3	ttt	Multi	ORF1ab	hCoV-19/England/ALDP-92DF34/2020	EPI_ISL_551558	2020-06-20	Europe
11074	3	ttt	Multi	ORF1ab	hCoV-19/England/20182008804/2020	EPI_ISL_465449	2020-04-24	Europe	Illumina NextSeq
11074	3	ttt	Multi	ORF1ab	hCoV-19/Thailand/SamutSakhon-CONI-0344/2020	EPI_ISL_733538	2020-12-19	Asia	Illumina MiSeq, 2 x 150bp paired end reads, ARTIC V3, Nextera Flex prep
11074	3	ttt	Multi	ORF1ab	hCoV-19/Scotland/EDB5638/2020	EPI_ISL_487695	2020-03-26	Europe	Illumina NovaSeq
11074	3	ttt	Multi	ORF1ab	hCoV-19/Wales/PHWC-15CF16/2020	EPI_ISL_472640	2020-05-05	Europe	Illumina
11074	3	ttt	Multi	ORF1ab	hCoV-19/Scotland/GCVR-170073/2020	EPI_ISL_459574	2020-03-24	Europe	Illumina NovaSeq
11074	3	ttt	Multi	ORF1ab	hCoV-19/Portugal/PT0533/2020	EPI_ISL_454257	2020-04-07	Europe	Illumina NextSeq 550
11074	3	ttt	Multi	ORF1ab	hCoV-19/Wales/PHWC-31789/2020	EPI_ISL_446484	2020-04-12	Europe	Illumina
11074	3	ttt	Multi	ORF1ab	hCoV-19/Scotland/CVR3677/2020	EPI_ISL_478091	2020-05-22	Europe	Illumina
11074	3	ttt	Multi	ORF1ab	hCoV-19/England/CAMB-1AAC30/2020	EPI_ISL_470121	2020-04-19	Europe	Illumina NovaSeq
11074	3	ttt	Multi	ORF1ab	hCoV-19/England/NORT-28AD05/2020	EPI_ISL_492970	2020-04-15	Europe	Illumina NovaSeq
11074	3	ttt	Multi	ORF1ab	hCoV-19/Israel/CVL-2520/2021	EPI_ISL_944397	2021-01-14	Asia	Illumina MiSeq
11074	3	ttt	Multi	ORF1ab	hCoV-19/England/20139061104/2020	EPI_ISL_420735	2020-03-27	Europe	Illumina NextSeq
11074	3	ttt	Multi	ORF1ab	hCoV-19/England/202691845/2020	EPI_ISL_490226	2020-06-18	Europe	Illumina NextSeq
11074	3	ttt	Multi	ORF1ab	hCoV-19/England/20124094702/2020	EPI_ISL_418725	2020-03-18	Europe	Illumina NextSeq
11074	3	ttt	Multi	ORF1ab	hCoV-19/Saudi_Arabia/KAUST-MAKKAH1413/2020	EPI_ISL_678070	2020-06-28	Asia
11074	3	ttt	Multi	ORF1ab	hCoV-19/Canada/QC-JUS-V5300486/2020	EPI_ISL_889949	2020-03-27	North America	Illumina_NexteraFlex
11074	3	ttt	Multi	ORF1ab	hCoV-19/Romania/191Hunedoara/2020	EPI_ISL_807156	2020-12-28	Europe	Illumina MiSeq
11074	3	ttt	Multi	ORF1ab	hCoV-19/Jamaica/JM-CDC-0078/2020	EPI_ISL_450792	2020-03-11	North America	Illumina MiSeq, Sanger
11074	3	ttt	Multi	ORF1ab	hCoV-19/England/20180038104/2020	EPI_ISL_465439	2020-04-24	Europe	Illumina NextSeq
11074	3	ttt	Multi	ORF1ab	hCoV-19/England/MILK-B87A26/2020	EPI_ISL_724822	2020-11-13	Europe	Illumina
11074	3	ttt	Multi	ORF1ab	hCoV-19/Australia/VIC627/2020	EPI_ISL_426931	2020-03-29	Oceania	Illumina NextSeq 550
11074	3	ttt	Multi	ORF1ab	hCoV-19/England/20134020104/2020	EPI_ISL_423109	2020-03-23	Europe	Illumina NextSeq
11074	3	ttt	Multi	ORF1ab	hCoV-19/England/MILK-93DE34/2020	EPI_ISL_552875	2020-06-21	Europe	Illumina NovaSeq
11074	3	ttt	Multi	ORF1ab	hCoV-19/USA/CA-ALSR-4288/2020	EPI_ISL_648940	2020-10-20	North America	Illumina
11074	3	ttt	Multi	ORF1ab	hCoV-19/Wales/PHWC-3656C/2020	EPI_ISL_474682	2020-05-01	Europe	Illumina
11074	3	ttt	Multi	ORF1ab	hCoV-19/Taiwan/TSGH-26/2020	EPI_ISL_447252	2020-02-25	Asia	Illumina NovaSeq4000
11074	3	ttt	Multi	ORF1ab	hCoV-19/England/CAMC-990840/2020	EPI_ISL_551903	2020-08-27	Europe	Illumina NovaSeq
11074	3	ttt	Multi	ORF1ab	hCoV-19/England/NORW-E9A1E/2020	EPI_ISL_461841	2020-04-29	Europe	Illumina
11074	3	ttt	Multi	ORF1ab	hCoV-19/England/BRIS-12D53A/2020	EPI_ISL_481848	2020-05-03	Europe	Illumina NovaSeq
11074	3	ttt	Multi	ORF1ab	hCoV-19/Scotland/CVR3114/2020	EPI_ISL_461686	2020-04-25	Europe	Illumina
11074	3	ttt	Multi	ORF1ab	hCoV-19/USA/NY-QDX-130/2020	EPI_ISL_467887	2020-03-16	North America	Illumina MiSeq
11074	3	ttt	Multi	ORF1ab	hCoV-19/Scotland/EDB6267/2020	EPI_ISL_487875	2020-04-07	Europe	Illumina NovaSeq
11074	3	ttt	Multi	ORF1ab	hCoV-19/USA/UT-QDX-2589/2020	EPI_ISL_604965	2020-03-14	North America	Illumina MiSeq
11074	3	ttt	Multi	ORF1ab	hCoV-19/England/BRIS-123B32/2020	EPI_ISL_442699	2020-04-07	Europe	Illumina NovaSeq
11074	3	ttt	Multi	ORF1ab	hCoV-19/Jordan/SR-035/2020	EPI_ISL_429995	2020-03-30	Asia	Illumina
11074	3	ttt	Multi	ORF1ab	hCoV-19/Australia/VIC3497/2020	EPI_ISL_520253	2020-07-02	Oceania	Illumina NextSeq 500
11074	3	ttt	Multi	ORF1ab	hCoV-19/Canada/QC-JUS-V5280176/2020	EPI_ISL_889806	2020-03-26	North America	Illumina_NexteraFlex
11074	3	ttt	Multi	ORF1ab	hCoV-19/USA/NY-NYCPHL-001108/2020	EPI_ISL_671691	2020-10-19	North America	Illumina MiSeq
11074	3	ttt	Multi	ORF1ab	hCoV-19/Luxembourg/LNS9120473/2020	EPI_ISL_744856	2020-11-21	Europe	Illumina MiniSeq, (2x150bp, Amplicon, LNS primer scheme)
11074	3	ttt	Multi	ORF1ab	hCoV-19/USA/UT-QDX-1804/2020	EPI_ISL_604131	2020-03-14	North America	Illumina MiSeq
11074	3	ttt	Multi	ORF1ab	hCoV-19/Wales/PHWC-345F5/2020	EPI_ISL_446947	2020-04-20	Europe	Illumina
11074	3	ttt	Multi	ORF1ab	hCoV-19/Australia/VIC846/2020	EPI_ISL_427106	2020-04-04	Oceania	Illumina NextSeq 500
11074	3	ttt	Multi	ORF1ab	hCoV-19/England/20120013604/2020	EPI_ISL_465155	2020-03-15	Europe	Illumina NextSeq
11074	3	ttt	Multi	ORF1ab	hCoV-19/Malaysia/6306/2020	EPI_ISL_501219	2020-04-07	Asia	Illumina iSeq
11074	3	ttt	Multi	ORF1ab	hCoV-19/England/CAMB-7422F/2020	EPI_ISL_440345	2020-03-19	Europe	Illumina NovaSeq
11074	3	ttt	Multi	ORF1ab	hCoV-19/Wales/QEUH-9F6444/2020	EPI_ISL_588909	2020-09-25	Europe	Illumina NovaSeq
11074	3	ttt	Multi	ORF1ab	hCoV-19/England/NORT-28AD9C/2020	EPI_ISL_492976	2020-04-15	Europe	Illumina NovaSeq
11074	3	ttt	Multi	ORF1ab	hCoV-19/England/MILK-999D0C/2020	EPI_ISL_550391	2020-08-29	Europe	Illumina NovaSeq
11074	3	ttt	Multi	ORF1ab	hCoV-19/England/CAMB-82F81/2020	EPI_ISL_443335	2020-04-13	Europe	Illumina NovaSeq
11074	3	ttt	Multi	ORF1ab	hCoV-19/Jordan/AQ-ALSR-5248/2020	EPI_ISL_730486	2020-10-06	Asia	Illumina
11074	3	ttt	Multi	ORF1ab	hCoV-19/Australia/VIC2125/2020	EPI_ISL_480734	2020-06-19	Oceania	Illumina NextSeq 500
11074	3	ttt	Multi	ORF1ab	hCoV-19/USA/CA-QDX-2615/2020	EPI_ISL_604895	2020-03-15	North America	Illumina MiSeq
11074	3	ttt	Multi	ORF1ab	hCoV-19/Wales/PHWC-1631AD/2020	EPI_ISL_473258	2020-05-16	Europe	Illumina
11074	3	ttt	Multi	ORF1ab	hCoV-19/Wales/PHWC-492412/2020	EPI_ISL_705412	2020-11-17	Europe	Illumina
11074	3	ttt	Multi	ORF1ab	hCoV-19/England/CAMB-7F9C5/2020	EPI_ISL_470406	2020-04-09	Europe	Illumina NovaSeq
11074	3	ttt	Multi	ORF1ab	hCoV-19/England/CAMB-76849/2020	EPI_ISL_438269	2020-03-30	Europe	Illumina NovaSeq
11074	3	ttt	Multi	ORF1ab	hCoV-19/England/LOND-D88CD/2020	EPI_ISL_492747	2020-04-23	Europe	Illumina NovaSeq
11074	3	ttt	Multi	ORF1ab	hCoV-19/England/20118164704/2020	EPI_ISL_464989	2020-03-12	Europe	Illumina NextSeq
11074	3	ttt	Multi	ORF1ab	hCoV-19/England/20166011404/2020	EPI_ISL_466527	2020-04-14	Europe	Illumina NextSeq
11074	3	ttt	Multi	ORF1ab	hCoV-19/Canada/AB-35591/2020	EPI_ISL_805988	2020-05-14	North America	Illumina NovaSeq 6000
11074	3	ttt	Multi	ORF1ab	hCoV-19/Northern_Ireland/NIRE-245BC0/2020	EPI_ISL_921045	2020-12-30	Europe
11074	3	ttt	Multi	ORF1ab	hCoV-19/Spain/AR-IBV-2442/2020	EPI_ISL_468776	2020-03-24	Europe	Illumina MiSeq
11074	3	ttt	Multi	ORF1ab	hCoV-19/Australia/VIC680/2020	EPI_ISL_426975	2020-03-27	Oceania	Illumina NextSeq 550
11074	3	ttt	Multi	ORF1ab	hCoV-19/Wales/PHWC-16044D/2020	EPI_ISL_472934	2020-05-26	Europe	Illumina
11074	3	ttt	Multi	ORF1ab	hCoV-19/England/MILK-AB7E40/2020	EPI_ISL_623389	2020-10-21	Europe	Illumina NovaSeq
11074	3	ttt	Multi	ORF1ab	hCoV-19/England/ALDP-B84E4B/2020	EPI_ISL_676010	2020-11-14	Europe	Illumina NovaSeq
11074	3	ttt	Multi	ORF1ab	hCoV-19/England/MILK-958747/2020	EPI_ISL_554855	2020-06-09	Europe	Illumina NovaSeq
11074	3	ttt	Multi	ORF1ab	hCoV-19/USA/NY-QDX-2237/2020	EPI_ISL_604571	2020-03-15	North America	Illumina MiSeq
11074	3	ttt	Multi	ORF1ab	hCoV-19/Wales/PHWC-15E011/2020	EPI_ISL_472786	2020-05-13	Europe	Illumina
11074	3	ttt	Multi	ORF1ab	hCoV-19/England/BRIS-1251E3/2020	EPI_ISL_443885	2020-03-27	Europe	Illumina NovaSeq
11074	3	ttt	Multi	ORF1ab	hCoV-19/England/ALDP-A87289/2020	EPI_ISL_606097	2020-10-17	Europe	Illumina NovaSeq
11074	3	ttt	Multi	ORF1ab	hCoV-19/USA/CA-ALSR-4524/2020	EPI_ISL_666985	2020-10-22	North America	Illumina
11427	3	tta	Multi	ORF1ab	hCoV-19/Canada/ON-PPS-00233/2020	EPI_ISL_853229	2020-11-24	North America	Illumina
11427	3	tta	Multi	ORF1ab	hCoV-19/Canada/ON-PHL-21-00664/2021	EPI_ISL_925774	2021-01-00	North America	Illumina MiSeq
11427	3	tta	Multi	ORF1ab	hCoV-19/Canada/ON-PHL-20-04447/2020	EPI_ISL_854652	2020-12-00	North America	Illumina NextSeq
11427	3	tta	Multi	ORF1ab	hCoV-19/Canada/ON-PPS-00290/2020	EPI_ISL_853072	2020-11-24	North America	Illumina
11427	3	tta	Multi	ORF1ab	hCoV-19/Canada/ON-S1768/2020	EPI_ISL_755769	2020-11-08	North America	Illumina MiniSeq
11427	3	tta	Multi	ORF1ab	hCoV-19/Canada/ON-S1772/2020	EPI_ISL_755773	2020-11-08	North America	Illumina MiniSeq
11427	3	tta	Multi	ORF1ab	hCoV-19/Canada/ON-PHL-21-00238/2020	EPI_ISL_875706	2020-12-00	North America	Illumina MiSeq
11427	3	tta	Multi	ORF1ab	hCoV-19/Canada/ON-S2000/2020	EPI_ISL_755708	2020-11-24	North America	Illumina MiniSeq
11427	3	tta	Multi	ORF1ab	hCoV-19/Canada/ON-PPS-00288/2020	EPI_ISL_853048	2020-11-24	North America	Illumina
11530	3	cag	Singleton	ORF1ab	hCoV-19/Morocco/moh100/2020	EPI_ISL_476024	2020-05-05	Africa	Miseq
11540	3	ttt	Singleton	ORF1ab	hCoV-19/USA/TX-HMH-MCoV-11252/2020	EPI_ISL_789144	2020-09-03	North America	Oxford Nanopore
11910	3	atc	Singleton	ORF1ab	hCoV-19/USA/CA-ALSR-1534/2020	EPI_ISL_494648	2020-05-09	North America	Illumina
13895	3	tga	Multi	ORF1ab	hCoV-19/Costa_Rica/INC-0178/2020	EPI_ISL_769988	2020-11-16	North America
13895	3	tga	Multi	ORF1ab	hCoV-19/England/ALDP-118A94B/2021	EPI_ISL_959016	2021-01-26	Europe	Illumina NovaSeq	ERR5274565	DP=18683;AF=0.966815;SB=46;DP4=3,504,0,18063;INDEL;HRUN=1
14619	3	acg	Singleton	ORF1ab	hCoV-19/USA/MA-CDC-LC00000871/2020	EPI_ISL_887626	2020-12-24	North America
16875	3	aca	Singleton	ORF1ab	hCoV-19/USA/CA-QDX-4420/2021	EPI_ISL_914961	2021-01-14	North America	Illumina MiSeq	SRR13619765	DP=1494;AF=0.980589;SB=41;DP4=17,6,1420,45;INDEL;HRUN=1
18385	3	tgc	Singleton	ORF1ab	hCoV-19/Denmark/DCGC-33348/2021	EPI_ISL_870358	2021-01-11	Europe	Oxford Nanopore
19525	3	gat	Singleton	ORF1ab	hCoV-19/USA/NC-UNC-0029/2020	EPI_ISL_832088	2020-04-00	North America	Nanopore MinION
19553	3	gtt	Singleton	ORF1ab	hCoV-19/North_Macedonia/ZMC6172/2020	EPI_ISL_760246	2020-06-05	Europe
21230	3	ttg	Singleton	ORF1ab	hCoV-19/USA/NC-UNC-0012/2020	EPI_ISL_832084	2020-04-00	North America	Nanopore MinION
21384	3	ttc	Singleton	ORF1ab	hCoV-19/USA/MN1-MDH1/2020	EPI_ISL_414588	2020-03-05	North America	Nanopore MinION	SRR12229270	Not confirmed
21569	3	ttt	Multi	S	hCoV-19/USA/MA-MASPHL-01381/2020	EPI_ISL_876205	2020-12-29	North America
21569	3	ttt	Multi	S	hCoV-19/USA/CA-CZB-17184/2021	EPI_ISL_849924	2021-01-02	North America	Illumina NovaSeq	SRR13635835	Not confirmed
21569	3	ttt	Multi	S	hCoV-19/USA/VAN3819/2020	EPI_ISL_677684	2020-04-30	North America	Illumina MiSeq
21569	3	ttt	Multi	S	hCoV-19/USA/CA-QDX-3258/2021	EPI_ISL_855075	2021-01-07	North America		SRR13510987	Not confirmed
21569	3	ttt	Multi	S	hCoV-19/USA/CO-Broad-CMU_00010/2020	EPI_ISL_765576	2020-11-10	North America	Illumina NovaSeq 6000
21569	3	ttt	Multi	S	hCoV-19/England/QEUH-C4B8BA/2020	EPI_ISL_769794	2020-12-13	Europe	Illumina NovaSeq	ERR5052919	Not confirmed
21569	3	ttt	Multi	S	hCoV-19/Japan/PG-15648/2020	EPI_ISL_894280	2020-09-00	Asia	Illumina NextSeq2000
21569	3	ttt	Multi	S	hCoV-19/USA/MA-MASPHL-01419/2021	EPI_ISL_876060	2021-01-05	North America
21569	3	ttt	Multi	S	hCoV-19/France/PDL-IPP00336/2021	EPI_ISL_860865	2021-01-07	Europe	Illumina NextSeq 500
21569	3	ttt	Multi	S	hCoV-19/England/ALDP-11BED06/2021	EPI_ISL_970508	2021-01-28	Europe	Illumina NovaSeq
21569	3	ttt	Multi	S	hCoV-19/England/QEUH-A8B434/2020	EPI_ISL_643073	2020-10-16	Europe	Illumina NovaSeq
21569	3	ttt	Multi	S	hCoV-19/England/ALDP-11BF154/2021	EPI_ISL_970506	2021-01-28	Europe	Illumina NovaSeq
21569	3	ttt	Multi	S	hCoV-19/USA/WY-WPHL-21000581/2021	EPI_ISL_856939	2021-01-04	North America	Illumina MiSeq
21569	3	ttt	Multi	S	hCoV-19/Israel/CVL-1518/2021	EPI_ISL_944396	2021-01-05	Asia	Illumina MiSeq
21569	3	ttt	Multi	S	hCoV-19/Wales/PHWC-4B4A45/2021	EPI_ISL_841183	2021-01-04	Europe	Illumina
21569	3	ttt	Multi	S	hCoV-19/USA/MA-MASPHL-01380/2020	EPI_ISL_876204	2020-12-29	North America
21569	3	ttt	Multi	S	hCoV-19/USA/MA-MASPHL-01414/2021	EPI_ISL_876062	2021-01-05	North America
21569	3	ttt	Multi	S	hCoV-19/Wales/PHWC-4A690D/2020	EPI_ISL_764063	2020-12-17	Europe	Illumina
21572	3	ttt	Multi	S	hCoV-19/Japan/IC-0565/2020	EPI_ISL_779244	2020-09-00	Asia	Illumina iSeq
21572	3	ttt	Multi	S	hCoV-19/USA/CA-QDX-2839/2020	EPI_ISL_803067	2020-12-26	North America	Illumina MiSeq
21572	3	ttt	Multi	S	hCoV-19/Canada/Qc-JEW-Q9300034/2020	EPI_ISL_825809	2020-05-29	North America	Illumina NexteraFlex
21572	3	ttt	Multi	S	hCoV-19/USA/PR-CDC-LC00001496/2020	EPI_ISL_887881	2020-12-27	North America	PacBio
21572	3	ttt	Multi	S	hCoV-19/England/ALDP-9EAF7F/2020	EPI_ISL_580161	2020-09-24	Europe	Illumina NovaSeq
21761	3	gtt	Multi	S	hCoV-19/Italy/CAM-IZSM-45946/2020	EPI_ISL_602304	2020-10-01	Europe	NGS Illumina Miseq
21761	3	gtt	Multi	S	hCoV-19/Italy/CAM-IZSM-43083/2020	EPI_ISL_584069	2020-10-01	Europe	Illumina MiSeq
21761	3	gtt	Multi	S	hCoV-19/Italy/CAM-IZSM-45947/2020	EPI_ISL_584071	2020-10-01	Europe	Illumina MiSeq
22003	3	aac	Multi	S	hCoV-19/Bangladesh/BCSIR-NILMRC-463/2021	EPI_ISL_959416	2021-01-20	Asia	MiniSeq™
22003	3	aac	Multi	S	hCoV-19/Bangladesh/BCSIR-NILMRC-462/2021	EPI_ISL_959368	2021-01-20	Asia	Illumina MiniSeq
22040	3	tgg	Singleton	S	hCoV-19/United_Arab_Emirates/2084/2020	EPI_ISL_859654	2020-07-06	Asia
22083	3	ttt	Singleton	S	hCoV-19/England/ALDP-A6C958/2020	EPI_ISL_607200	2020-10-14	Europe	Illumina NovaSeq	ERR4789213	DP=18265;AF=0.946400;SB=0;DP4=268,0,17286,0;INDEL;HRUN=5
22320	3	ttc	Multi	S	hCoV-19/USA/VA-CDC-2-3767489/2020	EPI_ISL_903604	2020-12-05	North America	Illumina
22320	3	ttc	Multi	S	hCoV-19/USA/TX-DSHS-2235/2020	EPI_ISL_872375	2020-12-20	North America	Illumina MiSeq	SRR13521661	DP=71;AF=0.718310;SB=0;DP4=9,11,25,26;INDEL;HRUN=2
22320	3	ttc	Multi	S	hCoV-19/England/QEUH-F5D6D6/2021	EPI_ISL_852415	2021-01-07	Europe	Illumina NovaSeq	ERR5185153	DP=7742;AF=0.992638;SB=7;DP4=40,12,5188,2497;INDEL;HRUN=2
22320	3	ttc	Multi	S	hCoV-19/USA/TX-DSHS-2230/2020	EPI_ISL_872370	2020-12-20	North America	Illumina MiSeq	SRR13521666	DP=79;AF=0.873418;SB=0;DP4=5,5,33,36;INDEL;HRUN=2
22320	3	ttc	Multi	S	hCoV-19/Israel/CVL-506ngs/2020	EPI_ISL_804094	2020-12-28	Asia	Illumina MiSeq
22353	3	tta	Multi	S	hCoV-19/England/20109053406/2020	EPI_ISL_417278	2020-03-07	Europe	Illumina NextSeq
22353	3	tta	Multi	S	hCoV-19/England/CAMB-84A15/2020	EPI_ISL_440482	2020-03-10	Europe	Illumina MiSeq	ERR4463277	DP=172;AF=0.982558;SB=0;DP4=2,0,169,0;INDEL;HRUN=2
22353	3	tta	Multi	S	hCoV-19/England/CAMB-848C0/2020	EPI_ISL_440532	2020-03-05	Europe	Illumina MiSeq	ERR4463332	DP=320;AF=0.900000;SB=4;DP4=30,1,285,3;INDEL;HRUN=2
23120	3	cac	Multi	S	hCoV-19/USA/TX-HMH-MCoV-11171/2020	EPI_ISL_789231	2020-09-02	North America	Oxford Nanopore
23120	3	cac	Multi	S	hCoV-19/USA/TX-HMH-MCoV-8690/2020	EPI_ISL_780514	2020-07-02	North America
23120	3	cac	Multi	S	hCoV-19/USA/TX-HMH-MCoV-8939/2020	EPI_ISL_780516	2020-07-02	North America	Oxford Nanopore
23120	3	cac	Multi	S	hCoV-19/USA/TX-HMH-MCoV-9587/2020	EPI_ISL_780128	2020-07-02	North America	Oxford Nanopore
23120	3	cac	Multi	S	hCoV-19/USA/TX-HMH-MCoV-9227/2020	EPI_ISL_780518	2020-07-02	North America	Oxford Nanopore
23120	3	cac	Multi	S	hCoV-19/USA/TX-HMH-MCoV-8555/2020	EPI_ISL_780512	2020-07-01	North America	Oxford Nanopore
23120	3	cac	Multi	S	hCoV-19/USA/TX-HMH-MCoV-9275/2020	EPI_ISL_780520	2020-07-03	North America	Oxford Nanopore
23120	3	cac	Multi	S	hCoV-19/USA/TX-HMH-MCoV-10082/2020	EPI_ISL_789224	2020-07-07	North America	Oxford Nanopore
23120	3	cac	Multi	S	hCoV-19/USA/TX-HMH-MCoV-8387/2020	EPI_ISL_783577	2020-06-24	North America	Oxford Nanopore
23120	3	cac	Multi	S	hCoV-19/USA/TX-HMH-MCoV-12471/2020	EPI_ISL_789963	2020-09-27	North America	Oxford Nanopore
23120	3	cac	Multi	S	hCoV-19/USA/TX-HMH-MCoV-10571/2020	EPI_ISL_789229	2020-07-09	North America	Oxford Nanopore
23120	3	cac	Multi	S	hCoV-19/USA/TX-HMH-MCoV-9611/2020	EPI_ISL_780129	2020-07-04	North America	Oxford Nanopore
23120	3	cac	Multi	S	hCoV-19/USA/TX-HMH-MCoV-11651/2020	EPI_ISL_789958	2020-09-13	North America	Oxford Nanopore
23120	3	cac	Multi	S	hCoV-19/USA/TX-HMH-MCoV-10427/2020	EPI_ISL_789227	2020-07-08	North America	Oxford Nanopore
23120	3	cac	Multi	S	hCoV-19/USA/TX-HMH-MCoV-11555/2020	EPI_ISL_789932	2020-09-11	North America	Oxford Nanopore
23120	3	cac	Multi	S	hCoV-19/USA/TX-HMH-MCoV-9923/2020	EPI_ISL_780132	2020-07-06	North America	Oxford Nanopore
23120	3	cac	Multi	S	hCoV-19/USA/TX-HMH-MCoV-10835/2020	EPI_ISL_789185	2020-07-05	North America	Oxford Nanopore
23120	3	cac	Multi	S	hCoV-19/USA/TX-HMH-MCoV-11295/2020	EPI_ISL_789233	2020-09-03	North America	Oxford Nanopore
23120	3	cac	Multi	S	hCoV-19/USA/TX-HMH-MCoV-11363/2020	EPI_ISL_789956	2020-09-04	North America	Oxford Nanopore
23120	3	cac	Multi	S	hCoV-19/USA/TX-HMH-MCoV-11123/2020	EPI_ISL_789125	2020-09-01	North America	Oxford Nanopore
23120	3	cac	Multi	S	hCoV-19/USA/TX-HMH-MCoV-12255/2020	EPI_ISL_789960	2020-09-15	North America	Oxford Nanopore
23120	3	cac	Multi	S	hCoV-19/USA/TX-HMH-MCoV-11627/2020	EPI_ISL_789957	2020-09-11	North America	Oxford Nanopore
23120	3	cac	Multi	S	hCoV-19/USA/TX-HMH-MCoV-9971/2020	EPI_ISL_780127	2020-07-06	North America	Oxford Nanopore
23120	3	cac	Multi	S	hCoV-19/USA/TX-HMH-MCoV-11219/2020	EPI_ISL_789232	2020-09-02	North America	Oxford Nanopore
23120	3	cac	Multi	S	hCoV-19/USA/TX-HMH-MCoV-10739/2020	EPI_ISL_789230	2020-07-09	North America	Oxford Nanopore
23120	3	cac	Multi	S	hCoV-19/USA/TX-HMH-MCoV-12371/2020	EPI_ISL_789962	2020-09-26	North America	Oxford Nanopore
23120	3	cac	Multi	S	hCoV-19/USA/TX-HMH-MCoV-9251/2020	EPI_ISL_780519	2020-07-03	North America	Oxford Nanopore
23122	3	cct	Multi	S	hCoV-19/USA/TX-HMH-MCoV-9855/2020	EPI_ISL_780131	2020-07-06	North America	Oxford Nanopore
23122	3	cct	Multi	S	hCoV-19/USA/TX-HMH-MCoV-12323/2020	EPI_ISL_789961	2020-09-26	North America	Oxford Nanopore
23122	3	cct	Multi	S	hCoV-19/USA/TX-HMH-MCoV-11271/2020	EPI_ISL_789158	2020-09-03	North America	Oxford Nanopore
23122	3	cct	Multi	S	hCoV-19/USA/TX-HMH-MCoV-11751/2020	EPI_ISL_789959	2020-09-09	North America	Oxford Nanopore
23122	3	cct	Multi	S	hCoV-19/USA/TX-HMH-MCoV-8847/2020	EPI_ISL_780515	2020-07-02	North America	Oxford Nanopore
23122	3	cct	Multi	S	hCoV-19/USA/TX-HMH-MCoV-8679/2020	EPI_ISL_780439	2020-07-02	North America	Oxford Nanopore
23122	3	cct	Multi	S	hCoV-19/USA/TX-HMH-MCoV-10335/2020	EPI_ISL_789226	2020-07-07	North America	Oxford Nanopore
23122	3	cct	Multi	S	hCoV-19/USA/TX-HMH-MCoV-9131/2020	EPI_ISL_780517	2020-07-02	North America	Oxford Nanopore
23518	3	gct	Singleton	S	hCoV-19/Romania/BUCHAREST-IMT-1/2020	EPI_ISL_639739	2020-07-20	Europe	Illumina
23671	3	taa	Singleton	S	hCoV-19/Morocco/moh100/2020	EPI_ISL_476024	2020-05-05	Africa	Miseq
23933	3	cac	Multi	S	hCoV-19/Canada/BC-BCCDC-9712/2020	EPI_ISL_976776	2020-12-26	North America	Illumina MiSeq, 1200bp
23933	3	cac	Multi	S	hCoV-19/Canada/BC-BCCDC-9710/2020	EPI_ISL_976775	2020-12-26	North America	Illumina MiSeq, 1200bp
25472	3	ttt	Multi	ORF3a	hCoV-19/USA/WA-UW-13047/2020	EPI_ISL_570844	2020-06-30	North America	Illumina
25472	3	ttt	Multi	ORF3a	hCoV-19/England/QEUH-C4B8BA/2020	EPI_ISL_769794	2020-12-13	Europe	Illumina NovaSeq	ERR5052919	Not confirmed
25472	3	ttt	Multi	ORF3a	hCoV-19/Japan/PG-9767/2020	EPI_ISL_902478	2020-07-00	Asia	illumina NextSeq500
25472	3	ttt	Multi	ORF3a	hCoV-19/England/QEUH-C4B841/2020	EPI_ISL_769652	2020-12-13	Europe	Illumina NovaSeq	ERR5052920	Not confirmed
25691	3	cct	Multi	ORF3a	hCoV-19/Italy/CAM-TIGEM-1576/2020	EPI_ISL_960472	2020-12-14	Europe	MGI DNBSEQ-G400
25691	3	cct	Multi	ORF3a	hCoV-19/England/QEUH-A780DC/2020	EPI_ISL_638037	2020-10-14	Europe	Illumina	ERR5061955	DP=5120;AF=0.853125;SB=605;DP4=246,465,2947,1421;INDEL;HRUN=4
25691	3	cct	Multi	ORF3a	hCoV-19/England/ALDP-9D76DA/2020	EPI_ISL_576580	2020-09-18	Europe	Illumina	ERR5071964	DP=2280;AF=0.860088;SB=234;DP4=66,185,1175,786;INDEL;HRUN=4
25691	3	cct	Multi	ORF3a	hCoV-19/England/QEUH-B7E318/2020	EPI_ISL_727855	2020-11-14	Europe	Illumina	ERR5076140	DP=73442;AF=0.890553;SB=2147483647;DP4=3475,3412,49465,15939;INDEL;HRUN=4
25691	3	tga	Multi	ORF3a	hCoV-19/Italy/LOM-UniMI-vir1/2020	EPI_ISL_584051	2020-04-05	Europe	Illumina MiSeq
25691	3	tga	Multi	ORF3a	hCoV-19/Italy/LOM-UniMI-ICCS1/2020	EPI_ISL_584048	2020-03-21	Europe	Illumina MiSeq
25691	3	tga	Multi	ORF3a	hCoV-19/Italy/LOM-UniMI-1/2020	EPI_ISL_487276	2020-04-04	Europe	Illumina
25691	3	tga	Multi	ORF3a	hCoV-19/Italy/LOM-UniMI-ICCS3/2020	EPI_ISL_584052	2020-04-05	Europe	Illumina MiSeq
25691	3	tga	Multi	ORF3a	hCoV-19/Italy/LOM-UniMI-ICCS2/2020	EPI_ISL_584049	2020-03-24	Europe	Illumina MiSeq
25699	3	ccc	Multi	ORF3a	hCoV-19/USA/OR-OHSU-9181/2021	EPI_ISL_905927	2021-01-05	North America	Illumina Nextseq 500, Freed-Silander v1-1200bp
25699	3	ccc	Multi	ORF3a	hCoV-19/Iceland/4247/2020	EPI_ISL_827940	2020-10-09	Europe	Illumina Miseq
25699	3	ccc	Multi	ORF3a	hCoV-19/Luxembourg/LNS7633024/2020	EPI_ISL_910707	2020-12-08	Europe	Illumina MiniSeq, (2x150bp, Amplicon, LNS primer scheme)
25699	3	ccc	Multi	ORF3a	hCoV-19/USA/TX-HMH-MCoV-10488/2020	EPI_ISL_789228	2020-07-09	North America	Oxford Nanopore
25699	3	ccc	Multi	ORF3a	hCoV-19/Ecuador/UEES-9310/2021	EPI_ISL_962484	2021-00-00	South America	Illumina MiniSeq
25699	3	ccc	Multi	ORF3a	hCoV-19/USA/OH-JML-COHDEC15/2020	EPI_ISL_861435	2020-12-30	North America	Ion Torrent
25699	3	ccc	Multi	ORF3a	hCoV-19/USA/PA-CDC-LC00001622/2020	EPI_ISL_887880	2020-12-26	North America	PacBio
25699	3	ccc	Multi	ORF3a	hCoV-19/Australia/VIC9281/2020	EPI_ISL_562027	2020-08-16	Oceania	Illumina NextSeq 550	SRR12753323	DP=194;AF=0.969072;SB=4;DP4=2,1,160,28;INDEL;HRUN=4
25699	3	ccc	Multi	ORF3a	hCoV-19/Australia/VIC11783/2020	EPI_ISL_591791	2020-08-11	Oceania	Illumina NextSeq 500	SRR12895278	DP=646;AF=0.904025;SB=6;DP4=24,13,432,152;INDEL;HRUN=4
25699	3	ccc	Multi	ORF3a	hCoV-19/Australia/VIC8822/2020	EPI_ISL_562628	2020-08-02	Oceania	Illumina NextSeq 500	SRR12751206	DP=330;AF=0.936364;SB=27;DP4=7,10,241,68;INDEL;HRUN=4
25699	3	ccc	Multi	ORF3a	hCoV-19/USA/WA-UW-9755/2020	EPI_ISL_501162	2020-05-25	North America	NextSeq 500	SRR12352848	DP=162;AF=0.851852;SB=26;DP4=4,18,74,64;INDEL;HRUN=4
25699	3	ccc	Multi	ORF3a	hCoV-19/USA/FL-QDX-3427/2020	EPI_ISL_876824	2020-06-30	North America	Illumina MiSeq	SRR13565781	DP=632;AF=0.936709;SB=32;DP4=10,3,586,6;INDEL;HRUN=4
25699	3	ccc	Multi	ORF3a	hCoV-19/USA/WA-UW-9504/2020	EPI_ISL_570257	2020-05-18	North America	Illumina
25699	3	ccc	Multi	ORF3a	hCoV-19/USA/WA-UW-9534/2020	EPI_ISL_570260	2020-05-19	North America	Illumina
25699	3	ccc	Multi	ORF3a	hCoV-19/USA/OH-JML-COHDEC28/2020	EPI_ISL_861440	2020-12-31	North America	Ion Torrent
25699	3	ccc	Multi	ORF3a	hCoV-19/USA/OR-OHSU-8886/2020	EPI_ISL_905855	2020-12-31	North America	Illumina Nextseq 500, Freed-Silander v1-1200bp
25699	3	ccc	Multi	ORF3a	hCoV-19/Australia/VIC8089/2020	EPI_ISL_561525	2020-08-12	Oceania	Illumina NextSeq 550
25699	3	ccc	Multi	ORF3a	hCoV-19/Australia/VIC12614/2020	EPI_ISL_640454	2020-07-30	Oceania	Illumina NextSeq 500
25699	3	ccc	Multi	ORF3a	hCoV-19/England/QEUH-A4CA6A/2020	EPI_ISL_596012	2020-10-05	Europe	Illumina
25699	3	ccc	Multi	ORF3a	hCoV-19/England/LOND-1325E50/2021	EPI_ISL_920598	2021-01-22	Europe	Illumina	ERR5299575	DP=84;AF=0.904762;SB=0;DP4=0,0,66,10;INDEL;HRUN=4
25699	3	ccc	Multi	ORF3a	hCoV-19/Spain/CT-IrsiCaixaLJJCS1/2021	EPI_ISL_900492	2021-01-12	Europe	Illumina MiSeq
25699	3	ccc	Multi	ORF3a	hCoV-19/England/ALDP-91F788/2020	EPI_ISL_553327	2020-06-23	Europe	Illumina NovaSeq
25699	3	ccc	Multi	ORF3a	hCoV-19/USA/OH-DEC106/2020	EPI_ISL_826463	2020-12-30	North America	Ion Torrent
25699	3	ccc	Multi	ORF3a	hCoV-19/Australia/VIC14760/2020	EPI_ISL_592601	2020-08-13	Oceania	Illumina NextSeq 500
25699	3	ccc	Multi	ORF3a	hCoV-19/Spain/CT-IrsiCaixaLJCGS1/2021	EPI_ISL_900494	2021-01-15	Europe	Illumina MiSeq
25699	3	ccc	Multi	ORF3a	hCoV-19/Austria/CeMM1950/2020	EPI_ISL_854242	2020-00-00	Europe	Illumina NovaSeq
25703	3	ccc	Multi	ORF3a	hCoV-19/Australia/VIC10972/2020	EPI_ISL_561647	2020-07-30	Oceania	Illumina NextSeq 500
25703	3	ccc	Multi	ORF3a	hCoV-19/Australia/VIC15115/2020	EPI_ISL_592830	2020-08-28	Oceania	Illumina NextSeq 500
25703	3	ccc	Multi	ORF3a	hCoV-19/Denmark/DCGC-40524/2021	EPI_ISL_972201	2021-02-01	Europe	Oxford Nanopore
25703	3	ccc	Multi	ORF3a	hCoV-19/Australia/VIC16695/2020	EPI_ISL_640578	2020-08-06	Oceania	Illumina iSeq
25703	3	ccc	Multi	ORF3a	hCoV-19/England/ALDP-661DB5/2020	EPI_ISL_555645	2020-07-03	Europe	Illumina NovaSeq
25703	3	ccc	Multi	ORF3a	hCoV-19/England/ALDP-6FC186/2020	EPI_ISL_557383	2020-06-29	Europe	Illumina NovaSeq
25703	3	ccc	Multi	ORF3a	hCoV-19/Australia/VIC7919/2020	EPI_ISL_562623	2020-08-16	Oceania	Illumina NextSeq 500
25703	3	ccc	Multi	ORF3a	hCoV-19/England/ALDP-6FD62C/2020	EPI_ISL_557482	2020-06-29	Europe	Illumina NovaSeq
25703	3	ccc	Multi	ORF3a	hCoV-19/Australia/VIC15151/2020	EPI_ISL_592831	2020-08-14	Oceania	Illumina NextSeq 500
25703	3	ccc	Multi	ORF3a	hCoV-19/Australia/VIC11039/2020	EPI_ISL_562608	2020-07-30	Oceania	Illumina NextSeq 500
25703	3	ccc	Multi	ORF3a	hCoV-19/Australia/VIC14572/2020	EPI_ISL_592822	2020-08-26	Oceania	Illumina NextSeq 500
25703	3	ccc	Multi	ORF3a	hCoV-19/Australia/VIC14064/2020	EPI_ISL_591794	2020-08-22	Oceania	Illumina NextSeq 550
25703	3	ccc	Multi	ORF3a	hCoV-19/Australia/VIC9316/2020	EPI_ISL_562632	2020-08-19	Oceania	Illumina NextSeq 550
25703	3	ccc	Multi	ORF3a	hCoV-19/England/MILK-BB1847/2020	EPI_ISL_720320	2020-11-18	Europe	Illumina NovaSeq
25703	3	ccc	Multi	ORF3a	hCoV-19/England/ALDP-95505E/2020	EPI_ISL_553391	2020-06-12	Europe	Illumina NovaSeq
25703	3	ccc	Multi	ORF3a	hCoV-19/Scotland/QEUH-E4F4A1/2021	EPI_ISL_858556	2021-01-04	Europe	Illumina NovaSeq
25703	3	ccc	Multi	ORF3a	hCoV-19/Australia/VIC9130/2020	EPI_ISL_562629	2020-08-19	Oceania	Illumina NextSeq 550
25703	3	ccc	Multi	ORF3a	hCoV-19/Australia/VIC5827/2020	EPI_ISL_518621	2020-07-23	Oceania	Illumina NextSeq 550
25703	3	ccc	Multi	ORF3a	hCoV-19/Australia/VIC13621/2020	EPI_ISL_562618	2020-08-02	Oceania	Illumina NextSeq 500
25703	3	ccc	Multi	ORF3a	hCoV-19/England/ALDP-94FB83/2020	EPI_ISL_555290	2020-06-16	Europe	Illumina NovaSeq
25703	3	ccc	Multi	ORF3a	hCoV-19/USA/CA-CDC-STM-000008064/2021	EPI_ISL_978648	2021-01-09	North America	Illumina
25703	3	ccc	Multi	ORF3a	hCoV-19/Japan/PG-1792/2020	EPI_ISL_685398	2020-05-00	Asia	Illumina NextSeq500
25703	3	ccc	Multi	ORF3a	hCoV-19/Australia/VIC10789/2020	EPI_ISL_562592	2020-09-01	Oceania	Illumina NextSeq 500
25703	3	ccc	Multi	ORF3a	hCoV-19/Australia/VIC15071/2020	EPI_ISL_592828	2020-08-23	Oceania	Illumina NextSeq 500
25703	3	ccc	Multi	ORF3a	hCoV-19/England/QEUH-AF407E/2020	EPI_ISL_663054	2020-10-30	Europe	Illumina NovaSeq	ERR4893654	DP=8344;AF=0.928092;SB=0;DP4=181,0,7744,0;INDEL;HRUN=4
25703	3	ccc	Multi	ORF3a	hCoV-19/Australia/VIC10930/2020	EPI_ISL_562605	2020-09-04	Oceania	Illumina NextSeq 500
25703	3	ccc	Multi	ORF3a	hCoV-19/Australia/VIC4704/2020	EPI_ISL_519092	2020-07-10	Oceania	Illumina NextSeq 500
25703	3	ccc	Multi	ORF3a	hCoV-19/England/ALDP-95504F/2020	EPI_ISL_553521	2020-06-12	Europe	Illumina NovaSeq
25703	3	ccc	Multi	ORF3a	hCoV-19/Australia/VIC11435/2020	EPI_ISL_562613	2020-08-29	Oceania	Illumina NextSeq 550
25703	3	ccc	Multi	ORF3a	hCoV-19/Australia/VIC8289/2020	EPI_ISL_562625	2020-08-20	Oceania	Illumina NextSeq 550
25703	3	ccc	Multi	ORF3a	hCoV-19/Australia/VIC13161/2020	EPI_ISL_562595	2020-09-04	Oceania	Illumina NextSeq 500
25703	3	ccc	Multi	ORF3a	hCoV-19/Australia/VIC14759/2020	EPI_ISL_592826	2020-08-13	Oceania	Illumina NextSeq 500
25703	3	ccc	Multi	ORF3a	hCoV-19/England/MILK-BAAC45/2020	EPI_ISL_681573	2020-11-18	Europe	Illumina NovaSeq
25703	3	ccc	Multi	ORF3a	hCoV-19/USA/CA-ALSR-5735/2020	EPI_ISL_878392	2020-11-30	North America	Illumina
25703	3	ccc	Multi	ORF3a	hCoV-19/Australia/VIC13772/2020	EPI_ISL_562621	2020-08-18	Oceania	Illumina NextSeq 550
25703	3	ccc	Multi	ORF3a	hCoV-19/England/QEUH-AF4C4D/2020	EPI_ISL_662906	2020-10-30	Europe	Illumina NovaSeq
25703	3	ccc	Multi	ORF3a	hCoV-19/Australia/VIC12537/2020	EPI_ISL_640312	2020-07-30	Oceania	Illumina NextSeq 500
25703	3	ccc	Multi	ORF3a	hCoV-19/England/ALDP-955030/2020	EPI_ISL_553382	2020-06-12	Europe	Illumina NovaSeq
25703	3	ccc	Multi	ORF3a	hCoV-19/Australia/VIC9896/2020	EPI_ISL_562635	2020-08-25	Oceania	Illumina NextSeq 550
25703	3	ccc	Multi	ORF3a	hCoV-19/Australia/VIC12889/2020	EPI_ISL_640694	2020-08-02	Oceania	Illumina NextSeq 500
25703	3	ccc	Multi	ORF3a	hCoV-19/Scotland/QEUH-969637/2020	EPI_ISL_530953	2020-08-14	Europe	Illumina NovaSeq
25703	3	ccc	Multi	ORF3a	hCoV-19/Germany/SH-ChVir9283/2020	EPI_ISL_729419	2020-09-28	Europe	NextSeq
25703	3	ccc	Multi	ORF3a	hCoV-19/Australia/VIC10213/2020	EPI_ISL_561735	2020-08-26	Oceania	Illumina NextSeq 500
25703	3	ccc	Multi	ORF3a	hCoV-19/Australia/VIC16927/2020	EPI_ISL_663534	2020-08-06	Oceania	Illumina NextSeq 500
25703	3	ccc	Multi	ORF3a	hCoV-19/Australia/VIC11001/2020	EPI_ISL_562606	2020-07-30	Oceania	Illumina NextSeq 500
25703	3	ccc	Multi	ORF3a	hCoV-19/India/MH-ACTREC-274/2020	EPI_ISL_699926	2020-07-10	Asia	Illumina MiSeq
25703	3	ccc	Multi	ORF3a	hCoV-19/Australia/VIC15338/2020	EPI_ISL_592821	2020-09-07	Oceania	Illumina NextSeq 500
25703	3	ccc	Multi	ORF3a	hCoV-19/Australia/VIC9415/2020	EPI_ISL_561882	2020-00-00	Oceania	Illumina NextSeq 550
25703	3	ccc	Multi	ORF3a	hCoV-19/England/QEUH-AF27D5/2020	EPI_ISL_662739	2020-10-30	Europe	Illumina NovaSeq
25703	3	ccc	Multi	ORF3a	hCoV-19/Australia/VIC10220/2020	EPI_ISL_561486	2020-08-26	Oceania	Illumina NextSeq 500
25703	3	ccc	Multi	ORF3a	hCoV-19/Australia/VIC10480/2020	EPI_ISL_562600	2020-08-13	Oceania	Illumina NextSeq 500
25703	3	ccc	Multi	ORF3a	hCoV-19/Australia/VIC10076/2020	EPI_ISL_562596	2020-08-22	Oceania	Illumina NextSeq 550
25703	3	ccc	Multi	ORF3a	hCoV-19/England/QEUH-B9FC52/2020	EPI_ISL_721059	2020-11-18	Europe	Illumina NovaSeq
25703	3	ccc	Multi	ORF3a	hCoV-19/Australia/VIC13231/2020	EPI_ISL_640931	2020-08-01	Oceania	Illumina NextSeq 500
25703	3	ccc	Multi	ORF3a	hCoV-19/England/ALDP-9448A5/2020	EPI_ISL_555647	2020-06-07	Europe	Illumina NovaSeq
25703	3	ccc	Multi	ORF3a	hCoV-19/Australia/VIC18105/2020	EPI_ISL_854760	2020-08-21	Oceania	Illumina iSeq
25703	3	ccc	Multi	ORF3a	hCoV-19/England/MILK-956ECC/2020	EPI_ISL_554246	2020-06-08	Europe	Illumina NovaSeq
25703	3	ccc	Multi	ORF3a	hCoV-19/Australia/VIC10778/2020	EPI_ISL_562602	2020-08-02	Oceania	Illumina NextSeq 500
25703	3	ccc	Multi	ORF3a	hCoV-19/Australia/VIC16934/2020	EPI_ISL_663345	2020-08-07	Oceania	Illumina NextSeq 500
25703	3	ccc	Multi	ORF3a	hCoV-19/Canada/ON-S1320/2020	EPI_ISL_586353	2020-06-04	North America	Illumina MiniSeq
25703	3	ccc	Multi	ORF3a	hCoV-19/Australia/VIC16905/2020	EPI_ISL_663529	2020-08-06	Oceania	Illumina NextSeq 500
25703	3	ccc	Multi	ORF3a	hCoV-19/England/MILK-9A97CF/2020	EPI_ISL_551110	2020-08-31	Europe	Illumina NovaSeq	ERR4646265	DP=16365;AF=0.950626;SB=0;DP4=128,0,15557,0;INDEL;HRUN=4
25703	3	ccc	Multi	ORF3a	hCoV-19/England/ALDP-9448C3/2020	EPI_ISL_555512	2020-06-07	Europe	Illumina NovaSeq
25703	3	ccc	Multi	ORF3a	hCoV-19/England/ALDP-71D160/2020	EPI_ISL_557663	2020-07-01	Europe	Illumina NovaSeq
25703	3	ccc	Multi	ORF3a	hCoV-19/Australia/VIC16924/2020	EPI_ISL_663532	2020-08-06	Oceania	Illumina NextSeq 500
25703	3	ccc	Multi	ORF3a	hCoV-19/Australia/VIC15335/2020	EPI_ISL_592820	2020-09-07	Oceania	Illumina NextSeq 500
25703	3	ccc	Multi	ORF3a	hCoV-19/England/ALDP-92EF7F/2020	EPI_ISL_551386	2020-06-20	Europe	Illumina NovaSeq
25703	3	ccc	Multi	ORF3a	hCoV-19/England/MILK-B96A24/2020	EPI_ISL_676099	2020-11-13	Europe	Illumina NovaSeq
25703	3	ccc	Multi	ORF3a	hCoV-19/Australia/VIC14888/2020	EPI_ISL_592819	2020-09-03	Oceania	Illumina NextSeq 500
25703	3	ccc	Multi	ORF3a	hCoV-19/England/CAMC-B9A6E0/2020	EPI_ISL_673668	2020-11-15	Europe	Illumina NovaSeq
25703	3	ccc	Multi	ORF3a	hCoV-19/Australia/VIC10927/2020	EPI_ISL_562604	2020-09-07	Oceania	Illumina NextSeq 500
25703	3	ccc	Multi	ORF3a	hCoV-19/Australia/VIC12793/2020	EPI_ISL_562616	2020-09-09	Oceania	Illumina NextSeq 500
25703	3	ccc	Multi	ORF3a	hCoV-19/England/MILK-5630D9/2020	EPI_ISL_558290	2020-06-10	Europe	Illumina NovaSeq
25703	3	ccc	Multi	ORF3a	hCoV-19/Australia/VIC11439/2020	EPI_ISL_562614	2020-08-22	Oceania	Illumina NextSeq 550
25703	3	ccc	Multi	ORF3a	hCoV-19/Australia/VIC16158/2020	EPI_ISL_640631	2020-08-10	Oceania	Illumina NextSeq 500
25703	3	ccc	Multi	ORF3a	hCoV-19/England/CAMC-F76D4B/2021	EPI_ISL_845925	2021-01-09	Europe	Illumina NovaSeq
25703	3	ccc	Multi	ORF3a	hCoV-19/Australia/VIC12942/2020	EPI_ISL_591793	2020-07-30	Oceania	Illumina NextSeq 500
25703	3	ccc	Multi	ORF3a	hCoV-19/Australia/VIC11730/2020	EPI_ISL_641196	2020-08-14	Oceania	Illumina NextSeq 500
25703	3	ccc	Multi	ORF3a	hCoV-19/Australia/VIC10131/2020	EPI_ISL_562597	2020-08-26	Oceania	Illumina NextSeq 500
25703	3	ccc	Multi	ORF3a	hCoV-19/Australia/VIC16925/2020	EPI_ISL_663533	2020-08-06	Oceania	Illumina NextSeq 500
25703	3	ccc	Multi	ORF3a	hCoV-19/Australia/VIC9317/2020	EPI_ISL_561956	2020-08-19	Oceania	Illumina NextSeq 550
25703	3	ccc	Multi	ORF3a	hCoV-19/Australia/VIC14382/2020	EPI_ISL_591627	2020-09-20	Oceania	Illumina NextSeq 550
25703	3	ccc	Multi	ORF3a	hCoV-19/England/ALDP-94491B/2020	EPI_ISL_555522	2020-06-07	Europe	Illumina NovaSeq
25703	3	ccc	Multi	ORF3a	hCoV-19/England/CAMC-B77FB1/2020	EPI_ISL_668163	2020-11-12	Europe	Illumina NovaSeq
25703	3	ccc	Multi	ORF3a	hCoV-19/England/ALDP-BC6C07/2020	EPI_ISL_916017	2020-11-21	Europe	Illumina NovaSeq
25703	3	ccc	Multi	ORF3a	hCoV-19/Australia/VIC12455/2020	EPI_ISL_640469	2020-07-30	Oceania	Illumina NextSeq 500
25703	3	ccc	Multi	ORF3a	hCoV-19/Australia/VIC13664/2020	EPI_ISL_562620	2020-09-14	Oceania	Illumina NextSeq 550
25703	3	ccc	Multi	ORF3a	hCoV-19/England/ALDP-950A82/2020	EPI_ISL_554455	2020-06-14	Europe	Illumina NovaSeq
25703	3	ccc	Multi	ORF3a	hCoV-19/Canada/ON-PHL-20-80482/2020	EPI_ISL_925562	2020-04-00	North America	Illumina
25703	3	ccc	Multi	ORF3a	hCoV-19/Australia/VIC10922/2020	EPI_ISL_562603	2020-09-03	Oceania	Illumina NextSeq 500
25703	3	ccc	Multi	ORF3a	hCoV-19/Australia/VIC15824/2020	EPI_ISL_592832	2020-08-07	Oceania	Illumina NextSeq 500
25703	3	ccc	Multi	ORF3a	hCoV-19/England/CAMC-B79948/2020	EPI_ISL_667865	2020-11-10	Europe	Illumina NovaSeq
25703	3	ccc	Multi	ORF3a	hCoV-19/England/MILK-95771B/2020	EPI_ISL_553880	2020-06-09	Europe	Illumina NovaSeq
25703	3	ccc	Multi	ORF3a	hCoV-19/England/ALDP-71D151/2020	EPI_ISL_557642	2020-07-01	Europe	Illumina NovaSeq
25703	3	ccc	Multi	ORF3a	hCoV-19/Canada/ON-PHL-20-80483/2020	EPI_ISL_925561	2020-04-00	North America	Illumina
25703	3	ccc	Multi	ORF3a	hCoV-19/England/MILK-BA9ED7/2020	EPI_ISL_681589	2020-11-18	Europe	Illumina NovaSeq
25703	3	ccc	Multi	ORF3a	hCoV-19/England/MILK-957D64/2020	EPI_ISL_554724	2020-06-12	Europe	Illumina NovaSeq
25703	3	ccc	Multi	ORF3a	hCoV-19/Australia/VIC14598/2020	EPI_ISL_592823	2020-08-28	Oceania	Illumina NextSeq 500
25703	3	ccc	Multi	ORF3a	hCoV-19/Australia/VIC16908/2020	EPI_ISL_663530	2020-08-07	Oceania	Illumina NextSeq 500
25703	3	ccc	Multi	ORF3a	hCoV-19/England/ALDP-9448D2/2020	EPI_ISL_555655	2020-06-07	Europe	Illumina NovaSeq
25703	3	ccc	Multi	ORF3a	hCoV-19/Australia/VIC10355/2020	EPI_ISL_562598	2020-09-01	Oceania	Illumina NextSeq 550
25703	3	ccc	Multi	ORF3a	hCoV-19/USA/NY-Wadsworth-21009552-01/2021	EPI_ISL_884020	2021-01-15	North America	Illumina NextSeq
25703	3	ccc	Multi	ORF3a	hCoV-19/England/ALDP-6CC1AD/2020	EPI_ISL_556081	2020-06-30	Europe	Illumina NovaSeq
25703	3	ccc	Multi	ORF3a	hCoV-19/England/ALDP-C23681/2020	EPI_ISL_782892	2020-12-05	Europe	Illumina NovaSeq
25703	3	ccc	Multi	ORF3a	hCoV-19/Australia/VIC16923/2020	EPI_ISL_663531	2020-08-06	Oceania	Illumina NextSeq 500
25703	3	ccc	Multi	ORF3a	hCoV-19/Australia/VIC13173/2020	EPI_ISL_562617	2020-08-15	Oceania	Illumina NextSeq 500
25703	3	ccc	Multi	ORF3a	hCoV-19/Australia/VIC8076/2020	EPI_ISL_562624	2020-08-18	Oceania	Illumina NextSeq 550
25703	3	ccc	Multi	ORF3a	hCoV-19/Australia/VIC14039/2020	EPI_ISL_562622	2020-09-17	Oceania	Illumina NextSeq 550
25703	3	ccc	Multi	ORF3a	hCoV-19/Australia/VIC9305/2020	EPI_ISL_562631	2020-08-16	Oceania	Illumina NextSeq 550
25703	3	ccc	Multi	ORF3a	hCoV-19/Australia/VIC11804/2020	EPI_ISL_591792	2020-08-04	Oceania	Illumina NextSeq 500
25703	3	ccc	Multi	ORF3a	hCoV-19/USA/CA-SC210051/2021	EPI_ISL_914638	2021-01-20	North America	Illumina MiSeq
25703	3	ccc	Multi	ORF3a	hCoV-19/Australia/VIC10895/2020	EPI_ISL_562593	2020-09-03	Oceania	Illumina NextSeq 550
25703	3	ccc	Multi	ORF3a	hCoV-19/England/ALDP-8F79EB/2020	EPI_ISL_556591	2020-06-24	Europe	Illumina NovaSeq
25703	3	ccc	Multi	ORF3a	hCoV-19/Australia/VIC8482/2020	EPI_ISL_562627	2020-08-17	Oceania	Illumina NextSeq 500
25703	3	ccc	Multi	ORF3a	hCoV-19/India/MH-ACTREC-460/2020	EPI_ISL_700108	2020-08-10	Asia	Illumina MiSeq
25703	3	ccc	Multi	ORF3a	hCoV-19/Australia/VIC10190/2020	EPI_ISL_561771	2020-08-26	Oceania	Illumina NextSeq 500
25703	3	ccc	Multi	ORF3a	hCoV-19/Australia/VIC14726/2020	EPI_ISL_592824	2020-08-23	Oceania	Illumina NextSeq 500
25703	3	ccc	Multi	ORF3a	hCoV-19/Australia/VIC11448/2020	EPI_ISL_561521	2020-08-22	Oceania	Illumina NextSeq 550
25703	3	ccc	Multi	ORF3a	hCoV-19/Australia/VIC16144/2020	EPI_ISL_640768	2020-08-10	Oceania	Illumina NextSeq 500
25703	3	ccc	Multi	ORF3a	hCoV-19/England/ALDP-5D0A42/2020	EPI_ISL_558449	2020-06-19	Europe	Illumina NovaSeq
25703	3	ccc	Multi	ORF3a	hCoV-19/England/ALDP-720416/2020	EPI_ISL_557581	2020-07-01	Europe	Illumina NovaSeq
25703	3	ccc	Multi	ORF3a	hCoV-19/England/MILK-FAED3B/2021	EPI_ISL_864223	2021-01-09	Europe	Illumina NovaSeq
25703	3	ccc	Multi	ORF3a	hCoV-19/USA/CA-ALSR-5754/2020	EPI_ISL_878405	2020-11-19	North America	Illumina
25703	3	ccc	Multi	ORF3a	hCoV-19/Australia/VIC10692/2020	EPI_ISL_562591	2020-09-01	Oceania	Illumina NextSeq 500
25703	3	ccc	Multi	ORF3a	hCoV-19/England/ALDP-CB3CEE/2020	EPI_ISL_760898	2020-12-19	Europe	Illumina NovaSeq
25703	3	ccc	Multi	ORF3a	hCoV-19/England/ALDP-5B0116/2020	EPI_ISL_558861	2020-06-17	Europe	Illumina NovaSeq
25703	3	ccc	Multi	ORF3a	hCoV-19/England/QEUH-BCE1C4/2020	EPI_ISL_704464	2020-11-26	Europe	Illumina NovaSeq
25703	3	ccc	Multi	ORF3a	hCoV-19/England/ALDP-94FC08/2020	EPI_ISL_555198	2020-06-16	Europe	Illumina NovaSeq
25703	3	ccc	Multi	ORF3a	hCoV-19/Australia/VIC8295/2020	EPI_ISL_562626	2020-08-14	Oceania	Illumina NextSeq 550
25703	3	ccc	Multi	ORF3a	hCoV-19/Australia/VIC9282/2020	EPI_ISL_562630	2020-00-00	Oceania	Illumina NextSeq 550
25703	3	ccc	Multi	ORF3a	hCoV-19/Australia/VIC11167/2020	EPI_ISL_562611	2020-08-04	Oceania	Illumina NextSeq 500
25703	3	ccc	Multi	ORF3a	hCoV-19/England/ALDP-94FB92/2020	EPI_ISL_555265	2020-06-16	Europe	Illumina NovaSeq
25703	3	ccc	Multi	ORF3a	hCoV-19/Australia/VIC14819/2020	EPI_ISL_592827	2020-08-21	Oceania	Illumina NextSeq 500
25703	3	ccc	Multi	ORF3a	hCoV-19/Australia/VIC14134/2020	EPI_ISL_591795	2020-09-09	Oceania	Illumina NextSeq 550
25703	3	ccc	Multi	ORF3a	hCoV-19/Australia/VIC12465/2020	EPI_ISL_562615	2020-09-13	Oceania	Illumina NextSeq 500
25703	3	ccc	Multi	ORF3a	hCoV-19/Australia/VIC13645/2020	EPI_ISL_562619	2020-08-03	Oceania	Illumina NextSeq 500
25703	3	ccc	Multi	ORF3a	hCoV-19/Australia/VIC11062/2020	EPI_ISL_562609	2020-09-08	Oceania	Illumina NextSeq 500
25703	3	ccc	Multi	ORF3a	hCoV-19/USA/CO-CDPHE-2100015138/2020	EPI_ISL_771222	2020-11-21	North America	Illumina Miseq
25703	3	ccc	Multi	ORF3a	hCoV-19/Australia/VIC11095/2020	EPI_ISL_562610	2020-08-12	Oceania	Illumina NextSeq 500
25703	3	ccc	Multi	ORF3a	hCoV-19/Australia/VIC10479/2020	EPI_ISL_562599	2020-09-05	Oceania	Illumina NextSeq 500
25703	3	ccc	Multi	ORF3a	hCoV-19/Australia/VIC14752/2020	EPI_ISL_592825	2020-08-12	Oceania	Illumina NextSeq 500
25703	3	ccc	Multi	ORF3a	hCoV-19/Australia/VIC10555/2020	EPI_ISL_561712	2020-08-31	Oceania	Illumina NextSeq 500
25703	3	ccc	Multi	ORF3a	hCoV-19/England/ALDP-720C1E/2020	EPI_ISL_557651	2020-07-01	Europe	Illumina NovaSeq
25703	3	ccc	Multi	ORF3a	hCoV-19/England/QEUH-AF27A8/2020	EPI_ISL_662850	2020-10-30	Europe	Illumina NovaSeq
25703	3	ccc	Multi	ORF3a	hCoV-19/England/MILK-102EEA5/2021	EPI_ISL_880641	2021-01-11	Europe	Illumina NovaSeq
25703	3	ccc	Multi	ORF3a	hCoV-19/Australia/VIC11027/2020	EPI_ISL_562607	2020-07-30	Oceania	Illumina NextSeq 500
25703	3	ccc	Multi	ORF3a	hCoV-19/Australia/VIC15098/2020	EPI_ISL_592829	2020-08-28	Oceania	Illumina NextSeq 500
25703	3	ccc	Multi	ORF3a	hCoV-19/Australia/VIC9325/2020	EPI_ISL_562633	2020-08-21	Oceania	Illumina NextSeq 550
25703	3	ccc	Multi	ORF3a	hCoV-19/USA/MI-UM-10037677223/2021	EPI_ISL_873055	2021-01-05	North America	Illumina MiSeq
25703	3	ccc	Multi	ORF3a	hCoV-19/USA/ID-CDC-2-3769290/2020	EPI_ISL_903603	2020-12-22	North America	Illumina
25703	3	ccc	Multi	ORF3a	hCoV-19/Australia/VIC17883/2020	EPI_ISL_779530	2020-08-23	Oceania	Illumina NextSeq 500
25703	3	ccc	Multi	ORF3a	hCoV-19/Australia/VIC9994/2020	EPI_ISL_562636	2020-08-24	Oceania	Illumina NextSeq 550
25703	3	ccc	Multi	ORF3a	hCoV-19/Australia/VIC12847/2020	EPI_ISL_562594	2020-09-11	Oceania	Illumina NextSeq 500
25703	3	ccc	Multi	ORF3a	hCoV-19/Australia/VIC14341/2020	EPI_ISL_591796	2020-07-29	Oceania	Illumina NextSeq 550
25703	3	cct	Singleton	ORF3a	hCoV-19/Scotland/QEUH-E46A8A/2021	EPI_ISL_858501	2021-01-03	Europe	Illumina NovaSeq	ERR5179444	DP=432;AF=0.976852;SB=0;DP4=1,0,422,0;INDEL;HRUN=4
25757	3	aat	Multi	ORF3a	hCoV-19/USA/CT-QDX-3857/2021	EPI_ISL_906424	2021-01-06	North America	Illumina MiSeq	SRR13605867	DP=1032;AF=0.931202;SB=10;DP4=24,38,486,475;INDEL;HRUN=2
25757	3	aat	Multi	ORF3a	hCoV-19/Canada/ON-PHL-20-02291/2020	EPI_ISL_671521	2020-09-00	North America	Illumina MiSeq
25757	3	aat	Multi	ORF3a	hCoV-19/USA/NY-Wadsworth-21006164-01/2021	EPI_ISL_861410	2021-01-06	North America	Illumina NextSeq
25757	3	aat	Multi	ORF3a	hCoV-19/USA/NY-NYCPHL-001080/2020	EPI_ISL_633081	2020-10-17	North America	Illumina MiSeq
25757	3	aat	Multi	ORF3a	hCoV-19/USA/MD-MDH-0253/2020	EPI_ISL_602276	2020-10-05	North America	Illumina MiSeq
25757	3	aat	Multi	ORF3a	hCoV-19/Italy/CAM-TIGEM-1472/2020	EPI_ISL_900593	2020-12-14	Europe	MGI DNBSEQ-G400
25757	3	aat	Multi	ORF3a	hCoV-19/USA/DE-DHSS-F1001769/2020	EPI_ISL_708434	2020-09-10	North America	Illumina Miseq
25757	3	aat	Multi	ORF3a	hCoV-19/USA/NY-Wadsworth-21004967-01/2020	EPI_ISL_861274	2020-12-24	North America	Illumina NextSeq
25757	3	aat	Multi	ORF3a	hCoV-19/USA/NY-Wadsworth-21001339-01/2020	EPI_ISL_794257	2020-12-31	North America	Illumna MiSeq
25757	3	aat	Multi	ORF3a	hCoV-19/USA/PA-CDC-LC00003000/2020	EPI_ISL_887879	2020-12-30	North America	PacBio
25757	3	aat	Multi	ORF3a	hCoV-19/England/MILK-ECBE90/2021	EPI_ISL_836189	2021-01-03	Europe	Illumina NovaSeq	ERR5182576	DP=1607;AF=0.976353;SB=0;DP4=33,0,1569,0;INDEL;HRUN=2
25757	3	aat	Multi	ORF3a	hCoV-19/Canada/Qc-HCLM-7051284447/2020	EPI_ISL_825716	2020-08-28	North America	Illumina NexteraFlex
25757	3	aat	Multi	ORF3a	hCoV-19/USA/DE-DHSS-F994288/2020	EPI_ISL_708433	2020-09-15	North America	Illumina Miseq
25757	3	aat	Multi	ORF3a	hCoV-19/USA/NY-Wadsworth-21008456-01/2021	EPI_ISL_983101	2021-01-01	North America	Illumina NextSeq
25757	3	aat	Multi	ORF3a	hCoV-19/USA/NY-NYCPHL-001303/2020	EPI_ISL_683876	2020-11-10	North America	Illumina MiSeq
25757	3	aat	Multi	ORF3a	hCoV-19/USA/NY-Wadsworth-292062-01/2020	EPI_ISL_767585	2020-12-20	North America	Illumna MiSeq
25757	3	aat	Multi	ORF3a	hCoV-19/USA/NY-Wadsworth-291993-01/2020	EPI_ISL_767586	2020-12-20	North America	Illumna MiSeq
25757	3	aat	Multi	ORF3a	hCoV-19/USA/NY-Wadsworth-21004980-01/2020	EPI_ISL_861281	2020-12-24	North America	Illumina NextSeq
25757	3	aat	Multi	ORF3a	hCoV-19/USA/NY-Wadsworth-292413-01/2020	EPI_ISL_767653	2020-12-21	North America	Illumna MiSeq
25757	3	aat	Multi	ORF3a	hCoV-19/Canada/ON-PHL-20-02208/2020	EPI_ISL_671520	2020-09-00	North America	Illumina MiSeq
25757	3	aat	Multi	ORF3a	hCoV-19/USA/PA-CDC-STM-397/2021	EPI_ISL_850554	2021-01-02	North America	Illumina
25757	3	aat	Multi	ORF3a	hCoV-19/USA/PA-MGEL-00674/2020	EPI_ISL_681937	2020-10-06	North America	Illumina NextSeq
25757	3	aat	Multi	ORF3a	hCoV-19/Wales/PHWC-48DED0/2020	EPI_ISL_680774	2020-11-07	Europe	Illumina
25757	3	aat	Multi	ORF3a	hCoV-19/England/ALDP-11D5914/2021	EPI_ISL_963317	2021-01-30	Europe	Illumina NovaSeq
25757	3	aat	Multi	ORF3a	hCoV-19/USA/NY-NYCPHL-000973/2020	EPI_ISL_633003	2020-09-23	North America	Illumina MiSeq
25757	3	aat	Multi	ORF3a	hCoV-19/England/MILK-118CF74/2021	EPI_ISL_958457	2021-01-26	Europe	Illumina NovaSeq
25757	3	aat	Multi	ORF3a	hCoV-19/Canada/ON-PHL-20-04434/2020	EPI_ISL_854623	2020-11-00	North America	Illumina NextSeq
25757	3	aat	Multi	ORF3a	hCoV-19/USA/NY-Wadsworth-292401-01/2020	EPI_ISL_767652	2020-12-21	North America	Illumna MiSeq
25757	3	aat	Multi	ORF3a	hCoV-19/USA/PA-CDC-LC00002063/2020	EPI_ISL_887649	2020-12-27	North America	PacBio
25757	3	aat	Multi	ORF3a	hCoV-19/USA/NC-UNC-0012/2021	EPI_ISL_831361	2021-01-08	North America	Nanopore MinION
25757	3	aat	Multi	ORF3a	hCoV-19/USA/CT-CDC-2-3714059/2020	EPI_ISL_751554	2020-11-10	North America	Illumina
25757	3	aat	Multi	ORF3a	hCoV-19/USA/NC-UNC-0044/2021	EPI_ISL_911593	2021-01-18	North America	Nanopore MinION
25757	3	aat	Multi	ORF3a	hCoV-19/USA/MA-MGH-03013/2020	EPI_ISL_765680	2020-07-23	North America	Illumina NovaSeq 6000
25757	3	aat	Multi	ORF3a	hCoV-19/USA/PA-MGEL-01160/2020	EPI_ISL_853389	2020-09-21	North America	Illumina Nextseq
25757	3	aat	Multi	ORF3a	hCoV-19/Canada/ON-PHL-20-02406/2020	EPI_ISL_671596	2020-09-00	North America	Illumina MiSeq
25757	3	aat	Multi	ORF3a	hCoV-19/USA/NY-Wadsworth-21001330-01/2020	EPI_ISL_794248	2020-12-31	North America	Illumna MiSeq
25757	3	aat	Multi	ORF3a	hCoV-19/USA/NY-MSHSPSP-PV17748/2020	EPI_ISL_801874	2020-09-08	North America	Illumina MiSeq
25757	3	aat	Multi	ORF3a	hCoV-19/USA/DE-DHSS-F1009555/2020	EPI_ISL_708409	2020-10-03	North America	Illumina Miseq
25757	3	aat	Multi	ORF3a	hCoV-19/USA/NY-NYCPHL-001878/2020	EPI_ISL_832264	2020-12-21	North America	Illumina MiSeq
25757	3	aat	Multi	ORF3a	hCoV-19/USA/NY-NYCPHL-001237/2020	EPI_ISL_683860	2020-11-06	North America	Illumina MiSeq
25757	3	aat	Multi	ORF3a	hCoV-19/USA/NY-PRL-2021_0125_00E07/2021	EPI_ISL_984877	2021-01-18	North America	Illumina MiSeq/NextSeq
25757	3	aat	Multi	ORF3a	hCoV-19/USA/PA-MGEL-01162/2020	EPI_ISL_853390	2020-09-25	North America	Illumina Nextseq
25757	3	aat	Multi	ORF3a	hCoV-19/USA/NY-Wadsworth-21012083-01/2021	EPI_ISL_936273	2021-01-14	North America	Illumina NextSeq
25757	3	aat	Multi	ORF3a	hCoV-19/USA/NY-MSHSPSP-PV19494/2020	EPI_ISL_801947	2020-10-01	North America	Illumina MiSeq
25757	3	aat	Multi	ORF3a	hCoV-19/USA/DE-DHSS-FLW00630795/2021	EPI_ISL_961121	2021-01-08	North America	Illumina MiSeq
25757	3	aat	Multi	ORF3a	hCoV-19/USA/DE-DHSS-F1001832/2020	EPI_ISL_693688	2020-09-18	North America	Illumina MiSeq
25757	3	aat	Multi	ORF3a	hCoV-19/USA/NC-CDC-STM-A100144/2021	EPI_ISL_850882	2021-01-04	North America	Illumina
25882	3	ctt	Multi	ORF3a	hCoV-19/Denmark/DCGC-39334/2020	EPI_ISL_930476	2020-12-14	Europe	Oxford Nanopore
25882	3	ctt	Multi	ORF3a	hCoV-19/Denmark/DCGC-18461/2020	EPI_ISL_749176	2020-12-07	Europe	Oxford Nanopore
25882	3	ctt	Multi	ORF3a	hCoV-19/Japan/IC-0482/2020	EPI_ISL_768691	2020-12-00	Asia	Illumina NextSeq500
25882	3	ctt	Multi	ORF3a	hCoV-19/Denmark/DCGC-18168/2020	EPI_ISL_749175	2020-12-14	Europe	Oxford Nanopore
25882	3	ctt	Multi	ORF3a	hCoV-19/Denmark/DCGC-21644/2020	EPI_ISL_757716	2020-12-21	Europe	Oxford Nanopore
25882	3	ctt	Multi	ORF3a	hCoV-19/Denmark/DCGC-26291/2021	EPI_ISL_818142	2021-01-04	Europe	Oxford Nanopore
25882	3	ctt	Multi	ORF3a	hCoV-19/Denmark/DCGC-36603/2020	EPI_ISL_927744	2020-12-14	Europe	Oxford Nanopore
25882	3	ctt	Multi	ORF3a	hCoV-19/Denmark/DCGC-27497/2020	EPI_ISL_815408	2020-12-28	Europe	Oxford Nanopore
25882	3	ctt	Multi	ORF3a	hCoV-19/Denmark/DCGC-21581/2020	EPI_ISL_757715	2020-12-21	Europe	Oxford Nanopore
25882	3	ctt	Multi	ORF3a	hCoV-19/Denmark/DCGC-29483/2021	EPI_ISL_843530	2021-01-04	Europe	Oxford Nanopore
25882	3	ctt	Multi	ORF3a	hCoV-19/Denmark/DCGC-18096/2020	EPI_ISL_749174	2020-12-14	Europe	Oxford Nanopore
25882	3	ctt	Multi	ORF3a	hCoV-19/Denmark/DCGC-30367/2020	EPI_ISL_844205	2020-12-07	Europe	Oxford Nanopore
25882	3	ctt	Multi	ORF3a	hCoV-19/Denmark/DCGC-22781/2020	EPI_ISL_794324	2020-12-07	Europe	Oxford Nanopore
25882	3	ctt	Multi	ORF3a	hCoV-19/Denmark/DCGC-24996/2020	EPI_ISL_795033	2020-12-28	Europe	Oxford Nanopore
26078	3	ctt	Multi	ORF3a	hCoV-19/Portugal/PT1680/2020	EPI_ISL_731917	2020-11-13	Europe	Illumina NextSeq 550
26078	3	ctt	Multi	ORF3a	hCoV-19/Brazil/RS-00621/2020	EPI_ISL_779157	2020-11-24	South America	Illumina MiSeq
26078	3	ctt	Multi	ORF3a	hCoV-19/Brazil/RS-00624/2020	EPI_ISL_779158	2020-11-24	South America	Illumina MiSeq
26078	3	ctt	Multi	ORF3a	hCoV-19/Israel/CVL-929ngs/2020	EPI_ISL_889142	2020-12-31	Asia	Illumina MiSeq
26078	3	ctt	Multi	ORF3a	hCoV-19/South_Korea/KDCA0218/2020	EPI_ISL_747453	2020-11-26	Asia
26078	3	ctt	Multi	ORF3a	hCoV-19/France/PAC-MEPHI-2361/2020	EPI_ISL_644399	2020-10-09	Europe	Illumina MiSeq
26078	3	ctt	Multi	ORF3a	hCoV-19/USA/CA-CZB-1065/2020	EPI_ISL_437065	2020-04-13	North America	Illumina NovaSeq
26078	3	ctt	Multi	ORF3a	hCoV-19/Canada/BC-BCCDC-7521/2020	EPI_ISL_740690	2020-11-00	North America	Illumina MiSeq
26078	3	ctt	Multi	ORF3a	hCoV-19/England/NOTT-1135BF/2020	EPI_ISL_549362	2020-09-03	Europe	Oxford Nanopore	ERR4664477	Not confirmed
26078	3	ctt	Multi	ORF3a	hCoV-19/Lithuania/MR-LUHS-Eilnr338/2020	EPI_ISL_636868	2020-08-19	Europe	Illumina NextSeq 550
26078	3	ctt	Multi	ORF3a	hCoV-19/Brazil/RS-00671/2020	EPI_ISL_779164	2020-11-26	South America	Illumina MiSeq
26078	3	ctt	Multi	ORF3a	hCoV-19/England/MILK-A191AD/2020	EPI_ISL_612117	2020-10-03	Europe	Illumina	ERR4806301	Not confirmed
26078	3	ctt	Multi	ORF3a	hCoV-19/Israel/CVL-930ngs/2020	EPI_ISL_889143	2020-12-31	Asia	Illumina MiSeq
26078	3	ctt	Multi	ORF3a	hCoV-19/Iceland/5903/2020	EPI_ISL_829583	2020-09-22	Europe	Oxford Nanopore
26078	3	ctt	Multi	ORF3a	hCoV-19/England/NOTT-24740F/2021	EPI_ISL_840053	2021-01-08	Europe	Oxford Nanopore	ERR5218160	Not confirmed
26078	3	ctt	Multi	ORF3a	hCoV-19/Sweden/20-52831/2020	EPI_ISL_654956	2020-09-07	Europe	Ion Torrent S5 XL, Ion AmpliSeq SARS-CoV-2
26078	3	ctt	Multi	ORF3a	hCoV-19/France/ARA-109096/2020	EPI_ISL_728526	2020-11-18	Europe	Illumina NextSeq
26078	3	ctt	Multi	ORF3a	hCoV-19/Sweden/20-08987/2020	EPI_ISL_594150	2020-09-16	Europe	Ion Torrent S5 XL, Ion AmpliSeq SARS-CoV-2
26078	3	ctt	Multi	ORF3a	hCoV-19/Spain/MD-IBV-99013368/2020	EPI_ISL_831029	2020-11-26	Europe	IonTorrent
26078	3	ctt	Multi	ORF3a	hCoV-19/Sweden/20-53532/2020	EPI_ISL_676505	2020-11-10	Europe	Ion Torrent S5 XL, Ion AmpliSeq SARS-CoV-2
26078	3	ctt	Multi	ORF3a	hCoV-19/USA/NY-NYCPHL-001973/2020	EPI_ISL_832265	2020-12-28	North America	Illumina MiSeq
26078	3	ctt	Multi	ORF3a	hCoV-19/Denmark/DCGC-4120/2020	EPI_ISL_622076	2020-09-14	Europe	Nanopore MinION
26078	3	ctt	Multi	ORF3a	hCoV-19/England/MILK-11767C0/2021	EPI_ISL_947373	2021-01-26	Europe	Illumina NovaSeq
26078	3	ctt	Multi	ORF3a	hCoV-19/Canada/BC-BCCDC-7640/2020	EPI_ISL_975130	2020-11-08	North America	Illumina MiSeq, 1200bp
26078	3	ctt	Multi	ORF3a	hCoV-19/Sweden/20-23680/2020	EPI_ISL_654508	2020-10-05	Europe	Ion Torrent S5 XL, Ion AmpliSeq SARS-CoV-2
26078	3	ctt	Multi	ORF3a	hCoV-19/Poland/5738614221_diag1_gx1/2020	EPI_ISL_875960	2020-12-22	Europe	Oxford Nanopore
26078	3	ctt	Multi	ORF3a	hCoV-19/USA/CA-ALSR-1516/2020	EPI_ISL_494638	2020-05-09	North America	Illumina
26078	3	ctt	Multi	ORF3a	hCoV-19/France/ARA-NRC2813/2020	EPI_ISL_639983	2020-11-02	Europe	Illumina NextSeq
26078	3	ctt	Multi	ORF3a	hCoV-19/Italy/CAM-TIGEM-311/2020	EPI_ISL_776970	2020-09-02	Europe	MGI DNBSEQ-G400
26370	3	agt	Singleton	E	hCoV-19/Morocco/RA85/2020	EPI_ISL_467299	2020-05-21	Africa	Miseq
26492	3	tta	Multi		hCoV-19/England/QEUH-C93A26/2020	EPI_ISL_777115	2020-12-15	Europe		ERR5055270	DP=8964;AF=0.983936;SB=18;DP4=2,96,15,8805;INDEL;HRUN=1
26492	3	tta	Multi		hCoV-19/England/MILK-115296A/2021	EPI_ISL_938224	2021-01-22	Europe		ERR5279803	DP=1753;AF=0.974900;SB=0;DP4=0,32,0,1709;INDEL;HRUN=1
26492	3	tta	Multi		hCoV-19/England/CAMC-CB9F76/2020	EPI_ISL_777983	2020-12-18	Europe		ERR5054094	DP=6795;AF=0.983076;SB=15;DP4=1,85,1,6679;INDEL;HRUN=1
26492	3	tta	Multi		hCoV-19/England/CAMC-C98C1C/2020	EPI_ISL_762118	2020-12-17	Europe		ERR5040893	DP=7543;AF=0.973485;SB=0;DP4=0,130,3,7340;INDEL;HRUN=1
26493	3	ttt	Singleton		hCoV-19/Canada/ON-PHL-20-02332/2020	EPI_ISL_671556	2020-09-00	North America
27084	3	atc	Singleton	M	hCoV-19/Belgium/MBLG53285/2020	EPI_ISL_949253	2020-03-23	Europe	Illumina iSeq
27247	3	taa	Multi	ORF6	hCoV-19/USA/UT-02853/2020	EPI_ISL_513661	2020-04-29	North America	Illumina MiSeq	SRR12526097	DP=6894;AF=0.715115;SB=6;DP4=1378,588,3530,1400;INDEL;HRUN=1
27247	3	taa	Multi	ORF6	hCoV-19/England/MILK-102E397/2021	EPI_ISL_873430	2021-01-12	Europe	Illumina NovaSeq	ERR5191209	DP=21308;AF=0.994556;SB=0;DP4=85,0,21192,0;INDEL;HRUN=2
27249	3	att	Multi	ORF6	hCoV-19/Switzerland/GE-33058305/2021	EPI_ISL_953633	2021-01-24	Europe	Illumina NovaSeq
27249	3	att	Multi	ORF6	hCoV-19/Switzerland/GE-33091077/2021	EPI_ISL_953635	2021-01-27	Europe	Illumina NovaSeq
27249	3	att	Multi	ORF6	hCoV-19/Switzerland/GE-33127425/2021	EPI_ISL_981715	2021-01-31	Europe	Illumina NovaSeq
27249	3	att	Multi	ORF6	hCoV-19/Switzerland/un-33063201/2021	EPI_ISL_953634	2021-01-25	Europe	Illumina NovaSeq
27249	3	att	Multi	ORF6	hCoV-19/Switzerland/GE-32970256/2021	EPI_ISL_897697	2021-01-14	Europe	Illumina NovaSeq
27249	3	att	Multi	ORF6	hCoV-19/Switzerland/GE-33053723/2021	EPI_ISL_953632	2021-01-23	Europe	Illumina NovaSeq
27380	3	tgt	Singleton	ORF6	hCoV-19/England/CAMC-A3ED44/2020	EPI_ISL_609640	2020-10-05	Europe		ERR4786458	DP=8941;AF=0.994184;SB=0;DP4=0,18,10,8879;INDEL;HRUN=2
27384	3	ctc	Singleton	ORF6	hCoV-19/USA/OH-USAFSAM-S0080/2021	EPI_ISL_982626	2021-01-11	North America
27403	3	ttt	Multi	ORF7a	hCoV-19/USA/CA-ALSR-6144/2020	EPI_ISL_880188	2020-12-24	North America	Illumina
27403	3	ttt	Multi	ORF7a	hCoV-19/England/QEUH-53931F/2020	EPI_ISL_532261	2020-05-18	Europe	Illumina NovaSeq	ERR4597432	Not confirmed
27527	3	att	Singleton	ORF7a	hCoV-19/Switzerland/GE-32919041/2021	EPI_ISL_864632	2021-01-09	Europe	Illumina NovaSeq
27691	3	ttt	Multi	ORF7a	hCoV-19/England/ALDP-C69036/2020	EPI_ISL_820561	2020-12-14	Europe	Illumina NovaSeq	ERR5180737	Not confirmed
27691	3	ttt	Multi	ORF7a	hCoV-19/USA/VA-DCLS-2031/2020	EPI_ISL_677175	2020-10-14	North America	Illumina MiSeq	SRR13577910	Not confirmed
27791	3	ttt	Multi	ORF7b	hCoV-19/USA/OR-OHSU-3165/2020	EPI_ISL_667496	2020-10-05	North America	Illumina Nextseq 500, Freed-Silander v1-1200bp (see https://doi.org/10.1101/2020.05.28.122648)
27791	3	ttt	Multi	ORF7b	hCoV-19/USA/OR-OHSU-3115/2020	EPI_ISL_667487	2020-10-02	North America	Illumina Nextseq 500, Freed-Silander v1-1200bp (see https://doi.org/10.1101/2020.05.28.122648)
27791	3	ttt	Multi	ORF7b	hCoV-19/USA/OR-OHSU-2923/2020	EPI_ISL_667419	2020-09-05	North America	Illumina Nextseq 500, Freed-Silander v1-1200bp (see https://doi.org/10.1101/2020.05.28.122648)
27791	3	ttt	Multi	ORF7b	hCoV-19/USA/OR-OHSU-3153/2020	EPI_ISL_667495	2020-10-03	North America	Illumina Nextseq 500, Freed-Silander v1-1200bp (see https://doi.org/10.1101/2020.05.28.122648)
27879	3	ctg	Singleton	ORF7b	hCoV-19/France/ARA-110872/2020	EPI_ISL_728540	2020-11-23	Europe
27906	3	ttt	Multi	ORF8	hCoV-19/Lithuania/ID2576/2020	EPI_ISL_933897	2020-12-03	Europe	Illumina Miseq
27906	3	ttt	Multi	ORF8	hCoV-19/Lithuania/ID2365/2020	EPI_ISL_933829	2020-12-01	Europe	Illumina Miseq
27906	3	ttt	Multi	ORF8	hCoV-19/England/ALDP-118AA1B/2021	EPI_ISL_946532	2021-01-26	Europe	Illumina NovaSeq	ERR5273903	Not confirmed
27906	3	ttt	Multi	ORF8	hCoV-19/Norway/6238/2020	EPI_ISL_775276	2020-11-25	Europe	Illumina MiSeq, ARTICProtocol v3
27906	3	ttt	Multi	ORF8	hCoV-19/Japan/PG-8071/2020	EPI_ISL_687172	2020-07-00	Asia	Illumina NextSeq2000
27906	3	ttt	Multi	ORF8	hCoV-19/England/ALDP-1195B92/2021	EPI_ISL_947090	2021-01-27	Europe	Illumina NovaSeq	ERR5274099	Not confirmed
27906	3	ttt	Multi	ORF8	hCoV-19/Lithuania/ID2319/2020	EPI_ISL_933812	2020-12-01	Europe	Illumina Miseq
27906	3	ttt	Multi	ORF8	hCoV-19/England/NORT-295D8F/2020	EPI_ISL_488542	2020-05-17	Europe		ERR4423142	Not confirmed
27906	3	ttt	Multi	ORF8	hCoV-19/Lithuania/ID2799/2020	EPI_ISL_933965	2020-12-06	Europe	Illumina Miseq
27906	3	ttt	Multi	ORF8	hCoV-19/England/ALDP-F91436/2021	EPI_ISL_851731	2021-01-09	Europe	Illumina NovaSeq	ERR5186840	Not confirmed
27906	3	ttt	Multi	ORF8	hCoV-19/Lithuania/ID2549/2020	EPI_ISL_933885	2020-12-03	Europe	Illumina Miseq
28213	3	ttt	Singleton	ORF8	hCoV-19/Spain/MD-IBV-99013444/2020	EPI_ISL_831030	2020-12-15	Europe	IonTorrent
28242	3	ttt	Singleton	ORF8	hCoV-19/USA/UT-UPHL-201211705/2020	EPI_ISL_684018	2020-12-01	North America		SRR13234304	Not confirmed
28250	3	ctg	Multi	ORF8	hCoV-19/USA/TX-HMH-MCoV-9507/2020	EPI_ISL_780521	2020-07-03	North America
28250	3	ctg	Multi	ORF8	hCoV-19/USA/UT-UPHL-2102216798/2021	EPI_ISL_983377	2021-01-04	North America		SRR13694503	Not confirmed
28250	3	ctg	Multi	ORF8	hCoV-19/Luxembourg/LNS6318538/2020	EPI_ISL_910865	2020-12-12	Europe
28250	3	ctg	Multi	ORF8	hCoV-19/USA/NY-NYCPHL-000447/2020	EPI_ISL_631921	2020-04-03	North America
28250	3	ctg	Multi	ORF8	hCoV-19/USA/TX-HMH-MCoV-9719/2020	EPI_ISL_780130	2020-07-06	North America
28250	3	ctg	Multi	ORF8	hCoV-19/England/MILK-11C8BB4/2021	EPI_ISL_964459	2021-01-31	Europe		ERR5282720	DP=1624;AF=0.982143;SB=0;DP4=24,0,1593,2;INDEL;HRUN=3
28250	3	ctg	Multi	ORF8	hCoV-19/Wales/PHWC-4A63F0/2020	EPI_ISL_763443	2020-12-17	Europe		ERR5068366	DP=18460;AF=0.513001;SB=5;DP4=5670,4167,5381,4089;INDEL;HRUN=3
28250	3	ctg	Multi	ORF8	hCoV-19/USA/TX-HMH-MCoV-10078/2020	EPI_ISL_789225	2020-07-08	North America
28250	3	ctg	Multi	ORF8	hCoV-19/Australia/VIC15710/2020	EPI_ISL_592649	2020-00-00	Oceania		SRR12895742	DP=17341;AF=0.819964;SB=893;DP4=3960,841,9642,4577;INDEL;HRUN=3
28250	3	ctg	Multi	ORF8	hCoV-19/USA/TX-HMH-MCoV-8612/2020	EPI_ISL_780513	2020-07-01	North America
28250	3	ctg	Multi	ORF8	hCoV-19/Luxembourg/LNS9520401/2020	EPI_ISL_744931	2020-11-20	Europe
28250	3	ctg	Multi	ORF8	hCoV-19/Russia/MOS-RII-MH2800S/2020	EPI_ISL_639951	2020-09-22	Europe
28250	3	ctg	Multi	ORF8	hCoV-19/Luxembourg/LNS7015346/2020	EPI_ISL_770888	2020-12-03	Europe
28250	3	ctg	Multi	ORF8	hCoV-19/Luxembourg/LNS8592787/2020	EPI_ISL_744769	2020-12-14	Europe
28250	3	ctg	Multi	ORF8	hCoV-19/USA/UT-UPHL-2102710923/2020	EPI_ISL_930733	2020-12-28	North America		SRR13620865	Not confirmed
28250	3	ctg	Multi	ORF8	hCoV-19/Luxembourg/LNS0438319/2020	EPI_ISL_911069	2020-12-16	Europe
28250	3	ctg	Multi	ORF8	hCoV-19/Wales/PHWC-4A3B82/2020	EPI_ISL_763747	2020-12-12	Europe
28250	3	ctg	Multi	ORF8	hCoV-19/Austria/CeMM1950/2020	EPI_ISL_854242	2020-00-00	Europe	Illumina NovaSeq
28250	3	ctg	Multi	ORF8	hCoV-19/USA/TX-HMH-MCoV-9662/2020	EPI_ISL_780097	2020-07-06	North America
28251	3	tta	Singleton	ORF8	hCoV-19/Belgium/AZDelta20935-2105R/2021	EPI_ISL_978794	2021-02-06	Europe
28254	3	tca	Multi	ORF8	hCoV-19/Russia/SPE-RII-MH1512S/2020	EPI_ISL_596285	2020-09-11	Europe
28254	3	tca	Multi	ORF8	hCoV-19/Russia/SPE-RII-MH977S/2020	EPI_ISL_596369	2020-09-04	Europe
28254	3	tca	Multi	ORF8	hCoV-19/Austria/CeMM1768/2020	EPI_ISL_854246	2020-11-28	Europe	Illumina NovaSeq
28254	3	tca	Multi	ORF8	hCoV-19/Russia/SPE-RII-35589S/2020	EPI_ISL_596249	2020-09-28	Europe
28254	3	tca	Multi	ORF8	hCoV-19/Austria/CeMM1792/2020	EPI_ISL_853804	2020-12-03	Europe	Illumina NovaSeq
28254	3	tca	Multi	ORF8	hCoV-19/Russia/SVE-RII-MH1691S/2020	EPI_ISL_602342	2020-09-13	Europe
28254	3	tca	Multi	ORF8	hCoV-19/Belgium/Jessa_11-2103-007730/2021	EPI_ISL_949157	2021-01-22	Europe
28254	3	tca	Multi	ORF8	hCoV-19/Austria/CeMM1756/2020	EPI_ISL_854245	2020-11-26	Europe	Illumina NovaSeq
28254	3	tca	Multi	ORF8	hCoV-19/Russia/SPE-RII-MH981S/2020	EPI_ISL_596370	2020-09-04	Europe
28254	3	tca	Multi	ORF8	hCoV-19/Turkey/IST-GLAB-N038/2021	EPI_ISL_885146	2021-01-14	Europe
28254	3	tca	Multi	ORF8	hCoV-19/Russia/SPE-RII-MH1049S/2020	EPI_ISL_596256	2020-09-06	Europe
28254	3	tca	Multi	ORF8	hCoV-19/Austria/CeMM1863/2020	EPI_ISL_854251	2020-11-12	Europe	Illumina NovaSeq
28254	3	tca	Multi	ORF8	hCoV-19/Austria/CeMM1770/2020	EPI_ISL_854247	2020-11-28	Europe	Illumina NovaSeq
28254	3	tca	Multi	ORF8	hCoV-19/Austria/CeMM1780/2020	EPI_ISL_854248	2020-11-29	Europe	Illumina NovaSeq
28254	3	tca	Multi	ORF8	hCoV-19/Russia/SPE-RII-MH982S/2020	EPI_ISL_596371	2020-09-04	Europe
28254	3	tca	Multi	ORF8	hCoV-19/Russia/SPE-RII-MH1061S/2020	EPI_ISL_596261	2020-09-06	Europe
28254	3	tca	Multi	ORF8	hCoV-19/Russia/MOS-RII-MH2797S/2020	EPI_ISL_602459	2020-09-20	Europe
28254	3	tca	Multi	ORF8	hCoV-19/Russia/KEM-RII-MH2796S/2020	EPI_ISL_602458	2020-09-25	Europe
28254	3	tca	Multi	ORF8	hCoV-19/Russia/SPE-RII-34613S/2020	EPI_ISL_596236	2020-09-17	Europe
28254	3	tca	Multi	ORF8	hCoV-19/England/MILK-EBCF17/2021	EPI_ISL_820938	2021-01-02	Europe
28254	3	tca	Multi	ORF8	hCoV-19/Belgium/Jessa_11-2103-006818/2021	EPI_ISL_949085	2021-01-21	Europe
28254	3	tca	Multi	ORF8	hCoV-19/Russia/KLU-RII-MH2795S/2020	EPI_ISL_602457	2020-09-16	Europe
28254	3	tca	Multi	ORF8	hCoV-19/Austria/CeMM1709/2020	EPI_ISL_854243	2020-11-23	Europe	Illumina NovaSeq
28254	3	tca	Multi	ORF8	hCoV-19/Austria/CeMM1744/2020	EPI_ISL_854244	2020-11-25	Europe	Illumina NovaSeq
28254	3	tca	Multi	ORF8	hCoV-19/USA/WI-WSLH-201196/2020	EPI_ISL_803436	2020-11-02	North America
28254	3	tca	Multi	ORF8	hCoV-19/Russia/SPE-RII-MH1515S/2020	EPI_ISL_596286	2020-09-11	Europe
28254	3	tcc	Multi	ORF8	hCoV-19/Austria/CeMM1803/2020	EPI_ISL_854249	2020-11-12	Europe
28254	3	tcc	Multi	ORF8	hCoV-19/Austria/CeMM1827/2020	EPI_ISL_854250	2020-11-12	Europe
28871	3	gca	Singleton	N	hCoV-19/Sweden/20-51969/2020	EPI_ISL_594154	2020-06-01	Europe	Ion Torrent S5 XL, Ion AmpliSeq SARS-CoV-2
28907	3	cta	Singleton	N	hCoV-19/Switzerland/GE-32978770/2021	EPI_ISL_897698	2021-01-15	Europe	Illumina NovaSeq
28934	3	tgc	Singleton	N	hCoV-19/England/ALDP-A6F2C3/2020	EPI_ISL_607155	2020-10-15	Europe	Illumina NovaSeq	ERR4789354	DP=12889;AF=0.954457;SB=214;DP4=32,463,62,12240;INDEL;HRUN=3
28987	3	caa	Multi	N	hCoV-19/Scotland/QEUH-B0E386/2020	EPI_ISL_649541	2020-11-02	Europe	Illumina NovaSeq	ERR4866387	Not confirmed
28987	3	caa	Multi	N	hCoV-19/Israel/CVL-44950/2020	EPI_ISL_745035	2020-12-01	Asia	Illumina MiSeq
28987	3	caa	Multi	N	hCoV-19/England/MILK-A4573D/2020	EPI_ISL_598687	2020-10-06	Europe	Illumina NovaSeq	ERR4763341
29389	3	aag	Singleton	N	hCoV-19/USA/CA-CZB-16019/2020	EPI_ISL_850049	2020-11-24	North America	Illumina NovaSeq	SRR13635874	DP=384;AF=0.890625;SB=3;DP4=22,15,223,119;INDEL;HRUN=5
29451	3	tct	Multi	N	hCoV-19/India/MH-ACTREC-337/2020	EPI_ISL_699986	2020-07-19	Asia	Illumina MiSeq
29451	3	tct	Multi	N	hCoV-19/India/MH-ACTREC-341/2020	EPI_ISL_699990	2020-07-20	Asia	Illumina MiSeq
29451	3	tct	Multi	N	hCoV-19/Australia/VIC9442/2020	EPI_ISL_562634	2020-08-18	Oceania	Illumina NextSeq 550	SRR12752992	DP=2486;AF=0.886565;SB=2;DP4=198,82,1597,607;INDEL;HRUN=1
29451	3	tct	Multi	N	hCoV-19/England/ALDP-11B2C9C/2021	EPI_ISL_964025	2021-01-30	Europe	Illumina NovaSeq	ERR5281550	DP=12394;AF=0.971196;SB=0;DP4=259,0,12030,7;INDEL;HRUN=1
29451	3	tct	Multi	N	hCoV-19/India/MH-ACTREC-334/2020	EPI_ISL_699983	2020-07-19	Asia	Illumina MiSeq
29451	3	tct	Multi	N	hCoV-19/India/MH-ACTREC-324/2020	EPI_ISL_699973	2020-07-17	Asia	Illumina MiSeq
29451	3	tct	Multi	N	hCoV-19/Chile/Santiago-PUC_MVL_0262/2020	EPI_ISL_801548	2020-05-04	South America	Illumina MiSeq
29764	3	tgt	Multi		hCoV-19/Japan/PG-5984/2020	EPI_ISL_688617	2020-08-00	Asia
29764	3	tgt	Multi		hCoV-19/Japan/PG-5985/2020	EPI_ISL_688618	2020-08-00	Asia
229	6	catcta	Singleton	ORF10	hCoV-19/USA/WA-UW283/2020	EPI_ISL_418068	2020-03-14	North America
1426	6	cacggt	Singleton	ORF1ab	hCoV-19/Sweden/20-52670/2020	EPI_ISL_594148	2020-08-20	Europe	Ion Torrent S5 XL, Ion AmpliSeq SARS-CoV-2
7084	6	aatggg	Multi	ORF1ab	hCoV-19/Slovakia/UKBA-408/2020	EPI_ISL_718256	2020-11-30	Europe	Nanopore MinION
7084	6	aatggg	Multi	ORF1ab	hCoV-19/Slovakia/UKBA-610/2020	EPI_ISL_788987	2020-11-30	Europe	Nanopore MinION
11074	6	ttcttt	Singleton	ORF1ab	hCoV-19/Wales/PHWC-1629D3/2020	EPI_ISL_473148	2020-05-16	Europe	Illumina
11074	6	tttttc	Singleton	ORF1ab	hCoV-19/Canada/BC-BCCDC-10020/2020	EPI_ISL_976477	2020-12-14	North America	Illumina MiSeq, 1200bp
11074	6	tttttt	Singleton	ORF1ab	hCoV-19/USA/MI-QDX-890/2020	EPI_ISL_571611	2020-03-18	North America	Illumina MiSeq	SRR13061377	Not confirmed
12877	6	ctacgg	Singleton	ORF1ab	hCoV-19/India/KA-InStem-NCBS-0061/2020	EPI_ISL_477261	2020-05-18	Asia	Illumina Hiseq
14605	6	tcctta	Singleton	ORF1ab	hCoV-19/Iran/HGRC-01-IPI-8206/2020	EPI_ISL_424349	2020-03-09	Asia	Oxford Nanopore technology; Sanger dideoxy sequencing
21770	6	tacatg	Multi	S	hCoV-19/Latvia/231/2021	EPI_ISL_856709	2021-01-12	Europe	Illumina MiSeq
21770	6	tacatg	Multi	S	hCoV-19/Latvia/230/2021	EPI_ISL_856708	2021-01-12	Europe	Illumina MiSeq
21770	6	tacatg	Multi	S	hCoV-19/Latvia/232/2021	EPI_ISL_856710	2021-01-12	Europe	Illumina MiSeq
21819	6	accatt	Multi	S	hCoV-19/Lithuania/VULSK-1555/2020	EPI_ISL_914882	2020-11-21	Europe	Illumina MiSeq
21819	6	accatt	Multi	S	hCoV-19/Lithuania/VULSK-397/2020	EPI_ISL_914886	2020-10-31	Europe	Illumina MiSeq
21819	6	accatt	Multi	S	hCoV-19/Lithuania/VULSK-5215/2020	EPI_ISL_914888	2020-12-24	Europe	Illumina MiSeq
21819	6	accatt	Multi	S	hCoV-19/Lithuania/VULSK-3648/2020	EPI_ISL_914885	2020-12-11	Europe	Illumina MiSeq
21819	6	taatga	Multi	S	hCoV-19/Lithuania/VULSK-347/2020	EPI_ISL_914884	2020-10-30	Europe	Illumina MiSeq
21819	6	taatga	Multi	S	hCoV-19/Lithuania/VULSK-1107/2020	EPI_ISL_914881	2020-11-13	Europe	Illumina MiSeq
21819	6	taatgt	Singleton	S	hCoV-19/Lithuania/VULSK-2920/2020	EPI_ISL_914883	2020-12-07	Europe	Illumina MiSeq
21956	6	aatttc	Singleton	S	hCoV-19/USA/UT-UPHL-2101267095/2020	EPI_ISL_943711	2020-12-03	North America	Illumina NextSeq	SRR13675672	DP=205;AF=0.648780;SB=31;DP4=29,32,30,103;INDEL;HRUN=2
23120	6	caccac	Singleton	S	hCoV-19/USA/TX-HMH-MCoV-11426/2020	EPI_ISL_789944	2020-09-06	North America	Oxford Nanopore
23120	6	cagcac	Multi	S	hCoV-19/USA/TX-HMH-MCoV-8306/2020	EPI_ISL_783572	2020-07-07	North America	Oxford Nanopore
23120	6	cagcac	Multi	S	hCoV-19/USA/TX-HMH-MCoV-10346/2020	EPI_ISL_789210	2020-07-08	North America	Oxford Nanopore
23120	6	cagcac	Multi	S	hCoV-19/USA/TX-HMH-MCoV-11378/2020	EPI_ISL_789943	2020-09-07	North America	Oxford Nanopore
23120	6	cagcac	Multi	S	hCoV-19/USA/TX-HMH-MCoV-12026/2020	EPI_ISL_789945	2020-09-22	North America	Oxford Nanopore
23120	6	cagcac	Multi	S	hCoV-19/USA/TX-HMH-MCoV-8354/2020	EPI_ISL_783573	2020-07-07	North America	Oxford Nanopore
23120	6	cagcac	Multi	S	hCoV-19/USA/TX-HMH-MCoV-8810/2020	EPI_ISL_780492	2020-07-02	North America
23120	6	cagcac	Multi	S	hCoV-19/USA/TX-HMH-MCoV-12266/2020	EPI_ISL_789946	2020-09-24	North America	Oxford Nanopore
23120	6	cagcac	Multi	S	hCoV-19/USA/TX-HMH-MCoV-9362/2020	EPI_ISL_780474	2020-07-03	North America	Oxford Nanopore
23120	6	cagcac	Multi	S	hCoV-19/USA/TX-HMH-MCoV-11852_R/2020	EPI_ISL_789878	2020-07-05	North America	Oxford Nanopore
23120	6	cagcac	Multi	S	hCoV-19/USA/TX-HMH-MCoV-10106/2020	EPI_ISL_789209	2020-07-07	North America	Oxford Nanopore
23120	6	cagcac	Multi	S	hCoV-19/USA/TX-HMH-MCoV-9554/2020	EPI_ISL_780121	2020-07-05	North America	Oxford Nanopore
23120	6	cagcac	Multi	S	hCoV-19/USA/TX-HMH-MCoV-8474/2020	EPI_ISL_780466	2020-07-01	North America	Oxford Nanopore
23120	6	cagcac	Multi	S	hCoV-19/USA/TX-HMH-MCoV-8738/2020	EPI_ISL_780491	2020-07-01	North America
23120	6	cagcac	Multi	S	hCoV-19/USA/TX-HMH-MCoV-8546/2020	EPI_ISL_780442	2020-07-01	North America	Oxford Nanopore
23120	6	cagcac	Multi	S	hCoV-19/USA/TX-HMH-MCoV-9410/2020	EPI_ISL_780493	2020-07-03	North America
23120	6	cagcac	Multi	S	hCoV-19/USA/TX-HMH-MCoV-10706/2020	EPI_ISL_789211	2020-07-09	North America	Oxford Nanopore
23120	6	cagcac	Multi	S	hCoV-19/USA/TX-HMH-MCoV-10010/2020	EPI_ISL_789208	2020-07-06	North America	Oxford Nanopore
23583	6	tcagac	Multi	S	hCoV-19/Japan/IC-0745/2021	EPI_ISL_918136	2021-01-00	Asia	Illumina NextSeq500
23583	6	tcagac	Multi	S	hCoV-19/Japan/IC-0667/2021	EPI_ISL_825402	2021-01-00	Asia	Illumina iSeq
27403	6	tttttt	Multi	ORF7a	hCoV-19/England/QEUH-9FAF12/2020	EPI_ISL_588167	2020-09-27	Europe	Illumina NovaSeq	ERR4688888	Not confirmed
27403	6	tttttt	Multi	ORF7a	hCoV-19/Wales/PHWC-4A22BB/2020	EPI_ISL_743869	2020-12-14	Europe	Illumina
27527	6	atttca	Singleton	ORF7a	hCoV-19/USA/NY-Wadsworth-21008828-01/2021	EPI_ISL_883431	2021-01-09	North America	Illumina NextSeq
27592	6	gttctg	Singleton	ORF7a	hCoV-19/Luxembourg/LNS7552009/2021	EPI_ISL_910607	2021-01-02	Europe	Illumina MiSeq DX, (2x250bp, Amplicon, LNS primer scheme)
27880	6	atctgt	Singleton	ORF7b	hCoV-19/USA/LA-EVTL1548/2020	EPI_ISL_889529	2020-12-30	North America
27903	6	ttgttt	Singleton	ORF8	hCoV-19/Japan/PG-14032/2020	EPI_ISL_895612	2020-09-00	Asia	illumina NextSeq2000
27906	6	tttttt	Multi	ORF8	hCoV-19/Lithuania/ID7316/2021	EPI_ISL_934255	2021-01-12	Europe	Illumina Miseq
27906	6	tttttt	Multi	ORF8	hCoV-19/Lithuania/ID3048/2020	EPI_ISL_934024	2020-12-08	Europe	Illumina Miseq
27906	6	tttttt	Multi	ORF8	hCoV-19/England/QEUH-C3326C/2020	EPI_ISL_782496	2020-12-11	Europe	Illumina NovaSeq	ERR5057654	Not confirmed
27906	6	tttttt	Multi	ORF8	hCoV-19/Lithuania/ID2861/2020	EPI_ISL_933986	2020-12-07	Europe	Illumina Miseq
27906	6	tttttt	Multi	ORF8	hCoV-19/England/QEUH-C54177/2020	EPI_ISL_736352	2020-12-12	Europe	Illumina NovaSeq	ERR5038749	Not confirmed
27906	6	tttttt	Multi	ORF8	hCoV-19/Canada/BC-BCCDC-9792/2020	EPI_ISL_976700	2020-12-22	North America	Illumina MiSeq, 1200bp
27906	6	tttttt	Multi	ORF8	hCoV-19/Lithuania/ID3526/2020	EPI_ISL_934089	2020-12-11	Europe	Illumina Miseq
27906	6	tttttt	Multi	ORF8	hCoV-19/England/ALDP-EF02F0/2021	EPI_ISL_834325	2021-01-03	Europe	Illumina NovaSeq	ERR5183922	Not confirmed
27906	6	tttttt	Multi	ORF8	hCoV-19/England/ALDP-11955FE/2021	EPI_ISL_946799	2021-01-27	Europe	Illumina NovaSeq	ERR5274201	Not confirmed
27906	6	tttttt	Multi	ORF8	hCoV-19/England/ALDP-1090F6F/2021	EPI_ISL_885263	2021-01-17	Europe	Illumina NovaSeq	ERR5207265	Not confirmed
28242	6	tttttt	Singleton	ORF8	hCoV-19/Spain/MD-IBV-006393/2020	EPI_ISL_510116	2020-04-29	Europe	Illumina MiSeq
29759	6	caccga	Singleton		hCoV-19/Switzerland/GE-32990664/2021	EPI_ISL_897614	2021-01-17	Europe
29775	6	agggag	Singleton		hCoV-19/Costa_Rica/INC-0178/2020	EPI_ISL_769988	2020-11-16	North America
532	9	atcgtgtgg	Singleton	ORF1ab	hCoV-19/England/QEUH-A4C5A5/2020	EPI_ISL_595981	2020-10-07	Europe	Illumina
687	9	cccggcgcc	Singleton	ORF1ab	hCoV-19/USA/NY-Wadsworth-21008828-01/2021	EPI_ISL_883431	2021-01-09	North America	Illumina NextSeq
3593	9	gcaattacg	Singleton	ORF1ab	hCoV-19/USA/NC-UNC-LCCC0177/2020	EPI_ISL_877757	2020-08-26	North America	Ion Torrent
6655	9	agcctagag	Singleton	ORF1ab	hCoV-19/Germany/BAV-PL-virotum_3qu7/2020	EPI_ISL_887327	2020-03-27	Europe	Illumina
7125	9	taccagtta	Multi	ORF1ab	hCoV-19/Australia/NSW1427/2021	EPI_ISL_803111	2021-01-08	Oceania	Illumina iSeq
7125	9	taccagtta	Multi	ORF1ab	hCoV-19/Australia/NSW1380/2020	EPI_ISL_768602	2020-12-28	Oceania	Illumina iSeq
13560	9	aaagtagct	Singleton	ORF1ab	hCoV-19/Italy/CAM-TIGEM-1174/2020	EPI_ISL_837436	2020-11-25	Europe	MGI DNBSEQ-G400
15891	9	ataagcact	Singleton	ORF1ab	hCoV-19/England/ALDP-9FD38C/2020	EPI_ISL_587815	2020-10-02	Europe	Illumina NovaSeq	ERR4689403	DP=25717;AF=0.973247;SB=55;DP4=246,5,25011,18;INDEL;HRUN=2
20139	9	agcctggcg	Singleton	ORF1ab	hCoV-19/Canada/BC-BCCDC-6254/2020	EPI_ISL_974255	2020-10-11	North America	Illumina MiSeq, 1200bp
21856	9	aaggctgag	Singleton	S	hCoV-19/England/ALDP-4A5607/2020	EPI_ISL_559536	2020-06-12	Europe	Illumina NovaSeq	ERR4632227	DP=50188;AF=0.682573;SB=2147483647;DP4=12785,782,11448,22809;INDEL;HRUN=2
21992	9	accacaaaa	Singleton	S	hCoV-19/Scotland/CVR3535/2020	EPI_ISL_478076	2020-05-14	Europe	Illumina
22204	9	aaaagaatt	Multi	S	hCoV-19/Denmark/DCGC-39425/2020	EPI_ISL_970811	2020-12-28	Europe	Oxford Nanopore
22204	9	aaaagaatt	Multi	S	hCoV-19/Denmark/DCGC-40619/2021	EPI_ISL_972296	2021-01-25	Europe	Oxford Nanopore
22204	9	acagatcga	Multi	S	hCoV-19/Belgium/rega-2212/2021	EPI_ISL_935304	2021-01-20	Europe	Nanopore MinION
22204	9	acagatcga	Multi	S	hCoV-19/England/ALDP-F09EA4/2020	EPI_ISL_945099	2020-12-17	Europe	Illumina NovaSeq
22204	9	acagatcga	Multi	S	hCoV-19/England/MILK-EB48D8/2021	EPI_ISL_820865	2021-01-02	Europe	Illumina NovaSeq	ERR4908671	DP=759;AF=0.939394;SB=0;DP4=0,7,0,713;INDEL;HRUN=1
22204	9	acagatcga	Multi	S	hCoV-19/Ireland/CW-NVRL-84IRL00453/2021	EPI_ISL_959873	2021-01-19	Europe	Oxford Nanopore MinION
22204	9	acagatcga	Multi	S	hCoV-19/Belgium/ULG-11629/2021	EPI_ISL_930612	2021-01-22	Europe	Nanopore MinION
22204	9	acagatcga	Multi	S	hCoV-19/Belgium/ULG-11626/2021	EPI_ISL_930611	2021-01-25	Europe	Nanopore MinION
22204	9	acagatcga	Multi	S	hCoV-19/Belgium/Jessa_55-2105-000845/2021	EPI_ISL_953383	2021-02-03	Europe	Illumina MiSeq
22204	9	acagatcga	Multi	S	hCoV-19/England/ALDP-CB0759/2020	EPI_ISL_760951	2020-12-05	Europe	Illumina NovaSeq	ERR5042339	DP=21284;AF=0.979139;SB=0;DP4=0,60,9,20831;INDEL;HRUN=1
22204	9	acagatcga	Multi	S	hCoV-19/Belgium/rega-2213/2021	EPI_ISL_935305	2021-01-20	Europe	Nanopore MinION
22204	9	acagatcga	Multi	S	hCoV-19/Belgium/AZDelta2103-10718/2021	EPI_ISL_911392	2021-01-20	Europe	Illumina MiSeq
22204	9	acagatcga	Multi	S	hCoV-19/Belgium/Jessa_55-2105-001032/2021	EPI_ISL_960184	2021-02-04	Europe	Illumina MiSeq
22204	9	acagatcga	Multi	S	hCoV-19/Belgium/ULG-11729/2021	EPI_ISL_965468	2021-01-21	Europe	Nanopore MinION
22204	9	acagatcga	Multi	S	hCoV-19/Belgium/AZDelta2102-15402/2021	EPI_ISL_911386	2021-01-18	Europe	Illumina MiSeq
22204	9	acagatcga	Multi	S	hCoV-19/Belgium/Jessa_55-2105-001118/2021	EPI_ISL_960186	2021-02-04	Europe	Illumina MiSeq
22204	9	acagatcga	Multi	S	hCoV-19/France/un-21012120423/2021	EPI_ISL_912821	2021-01-12	Europe	Illumina NextSeq500
22204	9	acagatcga	Multi	S	hCoV-19/France/un-21012200487/2021	EPI_ISL_912710	2021-01-20	Europe	Illumina NextSeq500
22204	9	acagatcga	Multi	S	hCoV-19/Belgium/rega-1865/2021	EPI_ISL_912424	2021-01-12	Europe	Nanopore MinION
22204	9	acagatcga	Multi	S	hCoV-19/England/MILK-FAA1E8/2021	EPI_ISL_864357	2021-01-09	Europe	Illumina NovaSeq	ERR5187872	DP=20774;AF=0.975402;SB=0;DP4=0,63,6,20257;INDEL;HRUN=1
22204	9	acagatcga	Multi	S	hCoV-19/England/QEUH-E8F108/2021	EPI_ISL_835579	2021-01-04	Europe	Illumina NovaSeq	ERR5181723	DP=4891;AF=0.965856;SB=0;DP4=0,29,3,4721;INDEL;HRUN=1
22204	9	acagatcga	Multi	S	hCoV-19/France/un-21012230159/2021	EPI_ISL_912709	2021-01-23	Europe	Illumina NextSeq500
22204	9	acagatcga	Multi	S	hCoV-19/Belgium/ULG-11260/2021	EPI_ISL_833185	2021-01-07	Europe	Nanopore MinION
22204	9	acagatcga	Multi	S	hCoV-19/England/QEUH-D84070/2020	EPI_ISL_797857	2020-12-29	Europe	Illumina NovaSeq	ERR5177623	DP=461;AF=0.986985;SB=2147483647;DP4=0,0,0,455;INDEL;HRUN=1
22204	9	acagatcga	Multi	S	hCoV-19/England/MILK-102EDB7/2021	EPI_ISL_880900	2021-01-11	Europe	Illumina NovaSeq
22204	9	acagatcga	Multi	S	hCoV-19/Belgium/ULG-11717/2021	EPI_ISL_965475	2021-01-23	Europe	Nanopore MinION
22204	9	acagatcga	Multi	S	hCoV-19/Belgium/AZDelta2102-15416/2021	EPI_ISL_911387	2021-01-18	Europe	Illumina MiSeq
22204	9	acagatcga	Multi	S	hCoV-19/Belgium/ULG-11799/2021	EPI_ISL_965474	2021-01-26	Europe	Nanopore MinION
22204	9	acagatcga	Multi	S	hCoV-19/France/un-21012310104/2021	EPI_ISL_982169	2021-01-31	Europe	Illumina NextSeq 598
22204	9	gcggcaggc	Multi	S	hCoV-19/Australia/QLD1532/2021	EPI_ISL_944743	2021-01-18	Oceania	Illumina
22204	9	gcggcaggc	Multi	S	hCoV-19/United_Arab_Emirates/4289/2020	EPI_ISL_860057	2020-12-27	Asia
22204	9	gcggcaggc	Multi	S	hCoV-19/Australia/QLD1526/2021	EPI_ISL_849762	2021-01-15	Oceania	Illumina
22204	9	gcggcaggc	Multi	S	hCoV-19/USA/NY-NYCPHL-002347/2021	EPI_ISL_857159	2021-01-11	North America	Illumina MiSeq
22204	9	gcggcaggc	Multi	S	hCoV-19/USA/FL-BPHL-0059/2021	EPI_ISL_965019	2021-01-22	North America	Illumina NextSeq
22204	9	gcggcaggc	Multi	S	hCoV-19/USA/NY-NYCPHL-002684/2021	EPI_ISL_937194	2021-01-18	North America	Illumina MiSeq
22204	9	gcggcaggc	Multi	S	hCoV-19/USA/FL-BPHL-0058/2021	EPI_ISL_965018	2021-01-25	North America	Illumina NextSeq
22204	9	gcggcaggc	Multi	S	hCoV-19/USA/FL-BPHL-0056/2021	EPI_ISL_965016	2021-01-24	North America	Illumina NextSeq
22204	9	gcggcaggc	Multi	S	hCoV-19/Costa_Rica/INC-0223/2021	EPI_ISL_914829	2021-01-11	North America
22204	9	gcggcaggc	Multi	S	hCoV-19/USA/NY-NYCPHL-002707/2021	EPI_ISL_937208	2021-01-22	North America	Illumina MiSeq
22204	9	gcggcaggc	Multi	S	hCoV-19/USA/FL-BPHL-0061/2021	EPI_ISL_965021	2021-01-16	North America	Illumina MiSeq
22204	9	gcggcaggc	Multi	S	hCoV-19/Luxembourg/LNS9360161/2021	EPI_ISL_910602	2021-01-02	Europe	Illumina MiSeq DX, (2x250bp, Amplicon, LNS primer scheme)
22204	9	gcggcaggc	Multi	S	hCoV-19/Luxembourg/LNS0547948/2021	EPI_ISL_910601	2021-01-02	Europe	Illumina MiSeq DX, (2x250bp, Amplicon, LNS primer scheme)
22204	9	gcggcaggc	Multi	S	hCoV-19/Costa_Rica/INC-0218/2021	EPI_ISL_914824	2021-01-04	North America
22204	9	gcggcaggc	Multi	S	hCoV-19/Luxembourg/LNS4380338/2021	EPI_ISL_910605	2021-01-02	Europe	Illumina MiSeq DX, (2x250bp, Amplicon, LNS primer scheme)
22204	9	gcggcaggc	Multi	S	hCoV-19/USA/FL-BPHL-0064/2021	EPI_ISL_965024	2021-01-17	North America	Illumina MiSeq
22204	9	gcggcaggc	Multi	S	hCoV-19/USA/FL-BPHL-0057/2021	EPI_ISL_965017	2021-01-25	North America	Illumina NextSeq
22204	9	gcggcaggc	Multi	S	hCoV-19/Costa_Rica/INC-0228/2021	EPI_ISL_914834	2021-01-10	North America
22304	9	cccaccaga	Singleton	S	hCoV-19/England/20139058604/2020	EPI_ISL_420726	2020-03-27	Europe	Illumina NextSeq
25703	9	ttgggagtt	Singleton	ORF3a	hCoV-19/England/MILK-118D483/2021	EPI_ISL_958414	2021-01-26	Europe	Illumina NovaSeq
27622	9	aacacgtct	Multi	ORF7a	hCoV-19/Malaysia/IMR-UCSI_R19/2021	EPI_ISL_877234	2021-01-08	Asia	Illumina NextSeq 500
27622	9	aacacgtct	Multi	ORF7a	hCoV-19/Malaysia/IMR-UCSI_R3/2021	EPI_ISL_877230	2021-01-08	Asia	Illumina NextSeq 500
27756	9	aaaactttt	Multi	ORF7a	hCoV-19/France/GES-IPP10974/2020	EPI_ISL_792006	2020-12-18	Europe	Illumina NextSeq 500
27756	9	aaaactttt	Multi	ORF7a	hCoV-19/France/GES-IPP10958/2020	EPI_ISL_754843	2020-12-17	Europe	Illumina NextSeq 500
27756	9	aaaactttt	Multi	ORF7a	hCoV-19/France/GES-IPP10957/2020	EPI_ISL_754845	2020-12-17	Europe	Illumina NextSeq 500
27756	9	aaaactttt	Multi	ORF7a	hCoV-19/France/GE-IPP10935/2020	EPI_ISL_832130	2020-12-17	Europe	Illumina NextSeq 500
27756	9	aaaactttt	Multi	ORF7a	hCoV-19/France/GES-IPP10968/2020	EPI_ISL_765479	2020-12-18	Europe	Illumina NextSeq 500
27756	9	aaaactttt	Multi	ORF7a	hCoV-19/France/GES-IPP10971/2020	EPI_ISL_754846	2020-12-18	Europe	Illumina NextSeq 500
27756	9	aaaactttt	Multi	ORF7a	hCoV-19/France/GES-IPP10959/2020	EPI_ISL_754844	2020-12-18	Europe	Illumina NextSeq 500
28031	9	tatgaatgg	Singleton	ORF8	hCoV-19/Australia/VIC7879/2020	EPI_ISL_561449	2020-08-10	Oceania	Illumina NextSeq 500	SRR12753720	DP=965;AF=0.920207;SB=61;DP4=36,32,208,680;INDEL;HRUN=1
28152	9	ctattattc	Singleton	ORF8	hCoV-19/Switzerland/GE-32925037/2021	EPI_ISL_864621	2021-01-10	Europe	Illumina NovaSeq
28257	9	aaacgaaca	Singleton	ORF8	hCoV-19/England/ALDP-10EB09F/2021	EPI_ISL_907480	2021-01-20	Europe	Illumina NovaSeq
28272	9	tttctttgg	Multi		hCoV-19/USA/NY-AECOM_135/2020	EPI_ISL_826591	2020-10-30	North America	Nanopore MinION
28272	9	tttctttgg	Multi		hCoV-19/USA/NY-PRL-2021_0125_00A10/2021	EPI_ISL_984869	2021-01-13	North America	Illumina MiSeq/NextSeq
28490	9	caattaaca	Singleton	N	hCoV-19/USA/SC-DHEC-0885/2020	EPI_ISL_538409	2020-06-26	North America	Illumina
28934	9	cagccagcc	Singleton	N	hCoV-19/Iceland/3032/2020	EPI_ISL_826703	2020-10-19	Europe	Illumina Miseq
29009	9	cgtcttggt	Singleton	N	hCoV-19/France/CVL-IPP01700/2021	EPI_ISL_953953	2021-01-22	Europe	Illumina NextSeq 500
29728	9	gttgttgga	Multi		hCoV-19/England/MILK-B8F43F/2020	EPI_ISL_674627	2020-11-13	Europe	Illumina NovaSeq
29728	9	gttgttgga	Multi		hCoV-19/England/MILK-B8C9BB/2020	EPI_ISL_675975	2020-11-13	Europe	Illumina NovaSeq
29728	9	gttgttgga	Multi		hCoV-19/England/ALDP-B24575/2020	EPI_ISL_647044	2020-11-04	Europe	Illumina NovaSeq	ERR4861148	DP=1930;AF=0.969948;SB=0;DP4=0,6,0,1872;INDEL;HRUN=4
29728	9	gttgttgga	Multi		hCoV-19/England/MILK-B8F44E/2020	EPI_ISL_674591	2020-11-13	Europe	Illumina NovaSeq
29728	9	gttgttgga	Multi		hCoV-19/England/MILK-B8D62C/2020	EPI_ISL_673988	2020-11-13	Europe	Illumina NovaSeq	ERR4907748	DP=892;AF=0.970852;SB=0;DP4=0,3,0,866;INDEL;HRUN=4
29728	9	gttgttgga	Multi		hCoV-19/England/MILK-B8C6B4/2020	EPI_ISL_675765	2020-11-12	Europe	Illumina NovaSeq
29728	9	gttgttgga	Multi		hCoV-19/England/MILK-B86526/2020	EPI_ISL_674119	2020-11-13	Europe	Illumina NovaSeq
29728	9	gttgttgga	Multi		hCoV-19/England/MILK-B8F47B/2020	EPI_ISL_674706	2020-11-13	Europe	Illumina NovaSeq
29728	9	gttgttgga	Multi		hCoV-19/England/CAMC-B32A2A/2020	EPI_ISL_659474	2020-11-05	Europe	Illumina NovaSeq	ERR4874166	DP=8787;AF=0.935700;SB=0;DP4=0,133,1,8221;INDEL;HRUN=4
29749	9	ataacactt	Multi		hCoV-19/Wales/PHWC-4B194B/2020	EPI_ISL_840651	2020-12-30	Europe	Illumina
29749	9	ataacactt	Multi		hCoV-19/Wales/PHWC-4BB45F/2021	EPI_ISL_922494	2021-01-15	Europe	Illumina
29749	9	ataacactt	Multi		hCoV-19/Wales/ALDP-100924A/2021	EPI_ISL_892174	2021-01-12	Europe	Illumina NovaSeq
29749	9	ataacactt	Multi		hCoV-19/Wales/ALDP-10192ED/2021	EPI_ISL_892030	2021-01-13	Europe	Illumina NovaSeq
29769	9	aatgctagg	Singleton		hCoV-19/Yunnan/02/2020	EPI_ISL_632934	2020-09-13	Asia	Illumina MiSeq
29769	9	gtagttaac	Singleton		hCoV-19/Turkey/HSGM-17956/2020	EPI_ISL_812875	2020-12-29	Europe	Illumina Miseq
6403	12	atagcttggaat	Multi	ORF1ab	hCoV-19/England/ALDP-CB4342/2020	EPI_ISL_761314	2020-12-18	Europe	Illumina NovaSeq	ERR5041966	DP=25015;AF=0.905617;SB=0;DP4=0,150,2,22652;INDEL;HRUN=1
6403	12	atagcttggaat	Multi	ORF1ab	hCoV-19/England/ALDP-CB3F9A/2020	EPI_ISL_761069	2020-12-18	Europe	Illumina NovaSeq	ERR5042504	DP=5311;AF=0.943890;SB=0;DP4=0,7,0,5013;INDEL;HRUN=1
19650	12	aatagctccacc	Singleton	ORF1ab	hCoV-19/England/QEUH-10BA679/2021	EPI_ISL_891559	2021-01-20	Europe	Illumina NovaSeq
21608	12	caactttgagga	Multi	S	hCoV-19/England/MILK-10AEEAD/2021	EPI_ISL_909191	2021-01-17	Europe	Illumina NovaSeq
21608	12	caactttgagga	Multi	S	hCoV-19/England/MILK-10AEECB/2021	EPI_ISL_909228	2021-01-17	Europe	Illumina NovaSeq
22204	12	aagcttggaccg	Singleton	S	hCoV-19/England/MILK-B8C845/2020	EPI_ISL_675778	2020-11-13	Europe	Illumina NovaSeq	ERR4908671	DP=759;AF=0.939394;SB=0;DP4=0,7,0,713;INDEL;HRUN=1
22204	12	gctaaaaagaat	Singleton	S	hCoV-19/Slovenia/751/2020	EPI_ISL_635200	2020-03-05	Europe	Illumina MiSeq
22204	12	gctcaagaaagg	Singleton	S	hCoV-19/USA/CA-QDX-4274/2021	EPI_ISL_915269	2021-01-15	North America	Illumina MiSeq	SRR13684543	Not confirmed
22298	12	gagattcgtggg	Singleton	S	hCoV-19/England/CAMC-E5257B/2021	EPI_ISL_821435	2021-01-02	Europe	Illumina NovaSeq	ERR5180217	DP=12797;AF=0.979448;SB=6;DP4=12,5,10234,2300;INDEL;HRUN=1
22304	12	ctagtcttactt	Singleton	S	hCoV-19/Austria/CeMM2207/2020	EPI_ISL_934434	2020-12-22	Europe	Illumina NovaSeq
22631	12	gaatcagcaaga	Singleton	S	hCoV-19/Turkey/HSGM-1169/2020	EPI_ISL_811137	2020-12-29	Europe	Illumina MiSeq
25339	12	gacagatgcatt	Singleton	S	hCoV-19/USA/WI-WSLH-210958/2021	EPI_ISL_984210	2021-01-25	North America	Illumina
27265	12	ttaaagtttcca	Singleton	ORF6	hCoV-19/England/SHEF-10D6255/2020	EPI_ISL_868645	2020-12-26	Europe	Oxford Nanopore
27295	12	taacctagttgc	Multi	ORF6	hCoV-19/England/SHEF-10D36A7/2020	EPI_ISL_763501	2020-12-20	Europe	Oxford Nanopore	ERR5060649	DP=481;AF=0.715177;SB=5;DP4=21,27,181,163;INDEL;HRUN=1
27295	12	taacctagttgc	Multi	ORF6	hCoV-19/England/SHEF-10CD9C5/2020	EPI_ISL_816425	2020-12-28	Europe	Oxford Nanopore	ERR5091014	DP=546;AF=0.712454;SB=0;DP4=22,22,191,198;INDEL;HRUN=1
28862	12	cagatcagatcg	Multi	N	hCoV-19/USA/AZ-TG280873/2020	EPI_ISL_694204	2020-04-23	North America	Illumina
28862	12	cagatcagatcg	Multi	N	hCoV-19/USA/AZ-TG280884/2020	EPI_ISL_694213	2020-04-24	North America	Illumina
3177	15	agaaaaccctcacct	Multi	ORF1ab	hCoV-19/USA/MD-CDC-STM-A100461/2021	EPI_ISL_850708	2021-01-06	North America	Illumina
3177	15	agaaaaccctcacct	Multi	ORF1ab	hCoV-19/USA/NY-Wadsworth-21004298-01/2021	EPI_ISL_830699	2021-01-04	North America	Illumina MiSeq
3177	15	agaaaaccctcacct	Multi	ORF1ab	hCoV-19/USA/NY-Wadsworth-21006673-01/2021	EPI_ISL_896388	2021-01-11	North America	Illumina NextSeq
3177	15	agaaaaccctcacct	Multi	ORF1ab	hCoV-19/USA/NY-NYCPHL-001343/2020	EPI_ISL_683877	2020-11-13	North America	Illumina MiSeq
3177	15	agaaaaccctcacct	Multi	ORF1ab	hCoV-19/USA/MI-UM-10036919468/2020	EPI_ISL_846746	2020-11-12	North America	Illumina MiSeq
3177	15	agaaaaccctcacct	Multi	ORF1ab	hCoV-19/USA/NY-Wadsworth-21006631-01/2021	EPI_ISL_896387	2021-01-11	North America	Illumina NextSeq
3177	15	agaaaaccctcacct	Multi	ORF1ab	hCoV-19/USA/NY-Wadsworth-21009509-01/2021	EPI_ISL_884022	2021-01-14	North America	Illumina NextSeq
3177	15	agaaaaccctcacct	Multi	ORF1ab	hCoV-19/USA/NY-Wadsworth-292707-01/2020	EPI_ISL_767654	2020-12-04	North America	Illumna MiSeq
11525	15	gatgttgttagacaa	Singleton	ORF1ab	hCoV-19/Saudi_Arabia/KAUST-MAKKAH149/2020	EPI_ISL_678057	2020-03-24	Asia
20486	15	aatgtcgcgcattgg	Singleton	ORF1ab	hCoV-19/Spain/CN-IBV-97006487/2020	EPI_ISL_537702	2020-03-25	Europe	Illumina MiSeq
27631	15	aatgtcgcgcattgg	Singleton	ORF7a	hCoV-19/England/ALDP-C3BCDF/2020	EPI_ISL_731651	2020-12-11	Europe	Illumina NovaSeq	ERR5025651	DP=8203;AF=0.931123;SB=0;DP4=25,0,7638,0;INDEL;HRUN=1
9622	21	ctcctgtccttcactccccaa	Multi	ORF1ab	hCoV-19/Belgium/Jessa_21-2103-001805/2021	EPI_ISL_949090	2021-01-22	Europe	Illumina MiSeq
9622	21	ctcctgtccttcactccccaa	Multi	ORF1ab	hCoV-19/Belgium/AZDelta22868-2105R/2021	EPI_ISL_978810	2021-02-06	Europe	Illumina MiSeq
9622	21	ctcctgtccttcactccccaa	Multi	ORF1ab	hCoV-19/Belgium/Jessa_11-2103-007650/2021	EPI_ISL_949128	2021-01-22	Europe	Illumina MiSeq
9622	21	ctcctgtccttcactccccaa	Multi	ORF1ab	hCoV-19/Belgium/AZDelta2103-25270/2021	EPI_ISL_911270	2021-01-00	Europe	Illumina MiSeq
9622	21	ctcctgtccttcactccccaa	Multi	ORF1ab	hCoV-19/Belgium/Jessa_11-2104-005976/2021	EPI_ISL_953450	2021-01-28	Europe	Illumina MiSeq
9622	21	ctcctgtccttcactccccaa	Multi	ORF1ab	hCoV-19/Belgium/AZDelta2103-24282/2021	EPI_ISL_911263	2021-01-00	Europe	Illumina MiSeq
9622	21	ctcctgtccttcactccccaa	Multi	ORF1ab	hCoV-19/Belgium/AZDelta02210-2105R/2021	EPI_ISL_954755	2021-02-01	Europe	Illumina MiSeq
9622	21	ctcctgtccttcactccccaa	Multi	ORF1ab	hCoV-19/Belgium/AZDelta210305712-01_S13/2021	EPI_ISL_911437	2021-01-18	Europe	Illumina MiSeq
9622	21	ctcctgtccttcactccccaa	Multi	ORF1ab	hCoV-19/Belgium/AZDelta18972-2105R/2021	EPI_ISL_978874	2021-02-06	Europe	Illumina MiSeq
9622	21	ctcctgtccttcactccccaa	Multi	ORF1ab	hCoV-19/Belgium/Jessa_11-2103-003163/2021	EPI_ISL_949069	2021-01-19	Europe	Illumina MiSeq
9622	21	ctcctgtccttcactccccaa	Multi	ORF1ab	hCoV-19/Belgium/AZDelta16805-2105R/2021	EPI_ISL_978864	2021-02-06	Europe	Illumina MiSeq
9622	21	ctcctgtccttcactccccaa	Multi	ORF1ab	hCoV-19/Belgium/AZDelta10-22110_S11/2021	EPI_ISL_913594	2021-01-16	Europe	Illumina MiSeq
9622	21	ctcctgtccttcactccccaa	Multi	ORF1ab	hCoV-19/Belgium/AZDelta2103177132021/2021	EPI_ISL_910015	2021-01-21	Europe	Illumina MiSeq
9622	21	ctgcagtccttcactccccac	Singleton	ORF1ab	hCoV-19/Belgium/AZDelta11-22111_S12/2021	EPI_ISL_913596	2021-01-16	Europe	Illumina MiSeq
9622	21	ctgctgtccttcactccccaa	Singleton	ORF1ab	hCoV-19/Belgium/AZDelta2103-13296/2021	EPI_ISL_911401	2021-01-20	Europe	Illumina MiSeq
7626	24	ttgtgatacattctgtgctggtag	Multi	ORF1ab	hCoV-19/Saudi_Arabia/KAUST-RIYADH1158/2020	EPI_ISL_678187	2020-06-15	Asia
7626	24	ttgtgatacattctgtgctggtag	Multi	ORF1ab	hCoV-19/SaudiArabia/KAUST-MAKKAH766/2020	EPI_ISL_513237	2020-04-18	Asia	Illumina NovaSeq
25472	24	ttttgttcgcgctactccttcaga	Multi	ORF3a	hCoV-19/Luxembourg/LNS4455151/2020	EPI_ISL_910428	2020-12-05	Europe	Illumina MiniSeq, (2x150bp, Amplicon, LNS primer scheme)
25472	24	ttttgttcgcgctactccttcaga	Multi	ORF3a	hCoV-19/Luxembourg/LNS4819866/2020	EPI_ISL_910426	2020-12-05	Europe	Illumina MiniSeq, (2x150bp, Amplicon, LNS primer scheme)
29387	24	aaaagaagaaggctgatgaaactc	Singleton	N	hCoV-19/USA/CA-QDX-3633/2021	EPI_ISL_906975	2021-01-09	North America	Illumina	SRR13610969	DP=1010;AF=0.904950;SB=0;DP4=52,0,914,0;INDEL;HRUN=5
21551	27	actttcgatctcttgtagatctgttct	Multi	ORF1ab	hCoV-19/Latvia/231/2021	EPI_ISL_856709	2021-01-12	Europe	Illumina MiSeq
21551	27	actttcgatctcttgtagatctgttct	Multi	ORF1ab	hCoV-19/Latvia/229/2021	EPI_ISL_856707	2021-01-12	Europe	Illumina MiSeq
21551	27	actttcgatctcttgtagatctgttct	Multi	ORF1ab	hCoV-19/Latvia/230/2021	EPI_ISL_856708	2021-01-12	Europe	Illumina MiSeq
21551	27	actttcgatctcttgtagatctgttct	Multi	ORF1ab	hCoV-19/Latvia/232/2021	EPI_ISL_856710	2021-01-12	Europe	Illumina MiSeq
4074	69	cgtaccgggcactggtggtgatcctggcgggcttctcgctgttgatctccaacctgggcctgaccaagc	Singleton	ORF1ab	hCoV-19/United_Arab_Emirates/4223/2020	EPI_ISL_860002	2020-05-04	Asia
27281	81	gaatcttgattacatcataaacctcataattaaaaatttatctaagtcactaactgagaataaatattctcaattagatga	Singleton	ORF6	hCoV-19/United_Arab_Emirates/4222/2020	EPI_ISL_860001	2020-05-04	Asia
959	195	gtgaaccactttttctttgcatttacttttttataggaactcctgtcatcactctctcacacacacacttagatgaacctgatggctaccctcttgagtgcattaaagaccttctagcacgtgctggtaaagcctcatgcactttgtccgaacaactggactttattgacactaagaggggtgtatactgctgcc	Singleton	ORF1ab	hCoV-19/Saudi_Arabia/KAUST-MAKKAH207/2020	EPI_ISL_678071	2020-04-06	Asia
