# Supplementary material for: Insertions in SARS-CoV-2 genome caused by template switch and duplications give rise to new variants of potential concern
Source: Research Square preprint supplement (doi:10.21203/rs.3.rs-456574/v1), 2021-05-05
Supplement: Supplementary file 6 [file f5d6ca2cbb7ed747fe532404.xlsx]

## Sheet: Inserts_141_all_features_export
Position	Length	Insertion	Times	Gene	Confirmed_by_reads	USHER	Confirmation status	Highly confident inserts
229	3	cat	1	ORF1ab			Singleton
229	3	gca	1	ORF1ab			Singleton
229	6	catcta	1	ORF1ab			Singleton
532	9	atcgtgtgg	1	ORF1ab			Singleton
626	3	ttc	3	ORF1ab	Y	No	Confirmed by reads	Y
687	9	cccggcgcc	1	ORF1ab			Singleton
959	195	gtgaaccactttttctttgcatttacttttttataggaactcctgtcatcactctctcacacacacacttagatgaacctgatggctaccctcttgagtgcattaaagaccttctagcacgtgctggtaaagcctcatgcactttgtccgaacaactggactttattgacactaagaggggtgtatactgctgcc	1	ORF1ab			Singleton
1426	6	cacggt	1	ORF1ab			Singleton
1813	3	aaa	4	ORF1ab	Y	No	Confirmed by reads	Y
1857	3	tcc	1	ORF1ab			Singleton
3073	3	gaa	9	ORF1ab	Y	No	Confirmed by reads	Y
3073	3	tgt	1	ORF1ab			Singleton
3177	15	agaaaaccctcacct	8	ORF1ab		Yes	Monophyletic	Y
3354	3	tta	1	ORF1ab			Singleton
3593	9	gcaattacg	1	ORF1ab			Singleton
4013	3	agc	1	ORF1ab			Singleton
4074	69	cgtaccgggcactggtggtgatcctggcgggcttctcgctgttgatctccaacctgggcctgaccaagc	1	ORF1ab			Singleton
5957	3	att	1	ORF1ab			Singleton
6403	12	atagcttggaat	2	ORF1ab	Y	Yes	Confirmed by reads	Y
6655	9	agcctagag	1	ORF1ab			Singleton
7084	6	aatggg	2	ORF1ab		Yes	Monophyletic
7125	9	taccagtta	2	ORF1ab		Yes	Monophyletic	Y
7626	24	ttgtgatacattctgtgctggtag	2	ORF1ab		No	Multiple genomes	Y
9622	21	ctcctgtccttcactccccaa	13	ORF1ab		No	Multiple genomes	Y
9622	21	ctgcagtccttcactccccac	1	ORF1ab			Singleton
9622	21	ctgctgtccttcactccccaa	1	ORF1ab			Singleton
11074	3	ttc	70	ORF1ab	Y	No	Confirmed by reads	Y
11074	3	ttt	239	ORF1ab	Y	No	Confirmed by reads	Y
11074	6	ttcttt	1	ORF1ab			Singleton
11074	6	tttttc	1	ORF1ab			Singleton
11427	3	tta	9	ORF1ab		Yes	Monophyletic
11525	15	gatgttgttagacaa	1	ORF1ab			Singleton
11530	3	cag	1	ORF1ab			Singleton
11540	3	ttt	1	ORF1ab			Singleton
11910	3	atc	1	ORF1ab			Singleton
12877	6	ctacgg	1	ORF1ab			Singleton
13560	9	aaagtagct	1	ORF1ab			Singleton
13895	3	tga	2	ORF1ab	Y	No	Confirmed by reads	Y
14605	6	tcctta	1	ORF1ab			Singleton
14619	3	acg	1	ORF1ab			Singleton
15891	9	ataagcact	1	ORF1ab	Y		Confirmed by reads	Y
16875	3	aca	1	ORF1ab	Y		Confirmed by reads	Y
18385	3	tgc	1	ORF1ab			Singleton
19525	3	gat	1	ORF1ab			Singleton
19553	3	gtt	1	ORF1ab			Singleton
19650	12	aatagctccacc	1	ORF1ab			Singleton
20139	9	agcctggcg	1	ORF1ab			Singleton
20486	15	aatgtcgcgcattgg	1	ORF1ab			Singleton
21230	3	ttg	1	ORF1ab			Singleton
21551	27	actttcgatctcttgtagatctgttct	4	ORF1ab		No	Multiple genomes	Y
21569	3	ttt	18	S		No	Multiple genomes
21572	3	ttt	5	S		No	Multiple genomes
21608	12	caactttgagga	2	S		Yes	Monophyletic	Y
21761	3	gtt	3	S		Yes	Monophyletic
21770	6	tacatg	3	S		No	Multiple genomes
21819	6	accatt	4	S		No	Multiple genomes
21819	6	taatga	2	S		Yes	Monophyletic
21819	6	taatgt	1	S			Singleton
21856	9	aaggctgag	1	S	Y		Confirmed by reads	Y
21956	6	aatttc	1	S	Y		Confirmed by reads	Y
21992	9	accacaaaa	1	S			Singleton
22003	3	aac	2	S		Yes	Monophyletic
22040	3	tgg	1	S			Singleton
22083	3	ttt	1	S	Y		Confirmed by reads	Y
22204	9	acagatcga	27	S	Y	Yes	Confirmed by reads	Y
22204	12	aagcttggaccg	1	S	Y		Confirmed by reads	Y
22204	9	aaaagaatt	2	S		Yes	Monophyletic	Y
22204	9	gcggcaggc	18	S		Yes	Monophyletic	Y
22204	12	gctaaaaagaat	1	S			Singleton
22298	12	gagattcgtggg	1	S	Y		Confirmed by reads	Y
22304	9	cccaccaga	1	S			Singleton
22304	12	ctagtcttactt	1	S			Singleton
22320	3	ttc	5	S	Y	No	Confirmed by reads	Y
22353	3	tta	3	S		No	Multiple genomes
22631	12	gaatcagcaaga	1	S			Singleton
23120	3	cac	27	S		No	Multiple genomes
23120	6	caccac	1	S	Y		Confirmed by reads	Y
23120	6	cagcac	17	S		No	Multiple genomes
23122	3	cct	8	S		No	Multiple genomes
23518	3	gct	1	S			Singleton
23583	6	tcagac	2	S		Yes	Monophyletic
23671	3	taa	1	S			Singleton
23933	3	cac	2	S		Yes	Monophyletic
25339	12	gacagatgcatt	1	S			Singleton
25472	3	ttt	4	ORF3a		No	Multiple genomes
25472	24	ttttgttcgcgctactccttcaga	2	ORF3a		Yes	Monophyletic	Y
25691	3	cct	4	ORF3a	Y	No	Confirmed by reads	Y
25691	3	tga	5	ORF3a		No	Multiple genomes
25699	3	ccc	26	ORF3a	Y	No	Confirmed by reads	Y
25703	3	ccc	154	ORF3a	Y	No	Confirmed by reads	Y
25703	3	cct	1	ORF3a			Singleton
25703	9	ttgggagtt	1	ORF3a			Singleton
25757	3	aat	47	ORF3a	Y	No	Confirmed by reads	Y
25882	3	ctt	14	ORF3a		No	Multiple genomes
26370	3	agt	1	E			Singleton
26492	3	tta	4		Y	No	Confirmed by reads	Y
26493	3	ttt	1				Singleton
27084	3	atc	1	M			Singleton
27247	3	taa	2	ORF6	Y	No	Confirmed by reads	Y
27249	3	att	6	ORF6		Yes	Monophyletic
27265	12	ttaaagtttcca	1	ORF6			Singleton
27281	81	gaatcttgattacatcataaacctcataattaaaaatttatctaagtcactaactgagaataaatattctcaattagatga	1	ORF6			Singleton
27295	12	taacctagttgc	2	ORF6	Y	Yes	Confirmed by reads	Y
27380	3	tgt	1	ORF6	Y		Confirmed by reads	Y
27384	3	ctc	1	ORF6			Singleton
27527	3	att	1	ORF7a			Singleton
27527	6	atttca	1	ORF7a			Singleton
27592	6	gttctg	1	ORF7a			Singleton
27622	9	aacacgtct	2	ORF7a		Yes	Monophyletic	Y
27631	15	aatgtcgcgcattgg	1	ORF7a	Y		Confirmed by reads	Y
27756	9	aaaactttt	7	ORF7a		Yes	Monophyletic	Y
27791	3	ttt	4	ORF7b		Yes	Monophyletic
27879	3	ctg	1	ORF7b			Singleton
27880	6	atctgt	1	ORF7b			Singleton
27903	6	ttgttt	1	ORF8			Singleton
28031	9	tatgaatgg	1	ORF8	Y		Confirmed by reads	Y
28152	9	ctattattc	1	ORF8			Singleton
28213	3	ttt	1	ORF8			Singleton
28242	6	tttttt	1	ORF8			Singleton
28251	3	tta	1	ORF8			Singleton
28254	3	tca	26	ORF8		Yes	Monophyletic
28254	3	tcc	2	ORF8		No	Multiple genomes
28257	9	aaacgaaca	1	ORF8			Singleton
28272	9	tttctttgg	2			Yes	Monophyletic	Y
28490	9	caattaaca	1	N			Singleton
28862	12	cagatcagatcg	2	N		No	Multiple genomes	Y
28871	3	gca	1	N			Singleton
28907	3	cta	1	N			Singleton
28934	3	tgc	1	N	Y		Confirmed by reads	Y
28934	9	cagccagcc	1	N			Singleton
29009	9	cgtcttggt	1	N			Singleton
29387	24	aaaagaagaaggctgatgaaactc	1	N	Y		Confirmed by reads	Y
29389	3	aag	1	N	Y		Confirmed by reads	Y
29451	3	tct	7	N	Y	No	Confirmed by reads	Y
29728	9	gttgttgga	9		Y	Yes	Confirmed by reads	Y
29749	9	ataacactt	4			No	Multiple genomes	Y
29759	6	caccga	1				Singleton
29764	3	tgt	2			Yes	Monophyletic
29769	9	aatgctagg	1				Singleton
29769	9	gtagttaac	1				Singleton
29775	6	agggag	1				Singleton
