# Supplementary material for: Insertions in SARS-CoV-2 genome caused by template switch and duplications give rise to new variants of potential concern
Source: Research Square preprint supplement (doi:10.21203/rs.3.rs-456574/v1), 2021-05-05
Supplement: Supplementary file 7 [file d330b2f3eb582b1fcc065477.xlsx]

## Sheet: Long highly confident
Position	Length	Insertion	Times	Gene	Confirmed_by_reads_or_ ultiple	Monophyletic	Mechanism	Origin_position
3177	15	agaaaaccctcacct	8	ORF1ab		Yes	Template switch	15262
6403	12	atagcttggaat	2	ORF1ab	Y	Yes	Template switch	22857
7125	9	taccagtta	2	ORF1ab		Yes	Possible template switch (complimentary strand)	14095; 11590
7626	24	ttgtgatacattctgtgctggtag	2	ORF1ab		No	Duplication
9622	21	ctcctgtccttcactccccaa	13	ORF1ab		No	Unknown
15891	9	ataagcact	1	ORF1ab	Y		Possible template switch (complimentary strand)	3675
21551	27	actttcgatctcttgtagatctgttct	4	ORF1ab		No	Template switch	34
21608	12	caactttgagga	2	S		Yes	Unknown
21856	9	aaggctgag	1	S	Y		Unknown
22204	12	aagcttggaccg	1	S	Y		Unknown
22204	9	acagatcga	27	S	Y	Yes	Unknown
22204	9	aaaagaatt	2	S		Yes	Template switch	10857
22204	9	gcggcaggc	18	S		Yes	Unknown
22298	12	gagattcgtggg	1	S	Y		Unknown
25472	24	ttttgttcgcgctactccttcaga	2	ORF3a		Yes	Duplication
27295	12	taacctagttgc	2	ORF6	Y	Yes	Template switch	18379
27622	9	aacacgtct	2	ORF7a		Yes	Duplication
27631	15	aatgtcgcgcattgg	1	ORF7a	Y		Template switch	29216
27756	9	aaaactttt	7	ORF7a		Yes	Unknown
28031	9	tatgaatgg	1	ORF8	Y		Unknown
28272	9	tttctttgg	2			Yes	Unknown
28862	12	cagatcagatcg	2	N		No	Unknown
29387	24	aaaagaagaaggctgatgaaactc	1	N	Y		Duplication
29728	9	gttgttgga	9		Y	Yes	Unknown
29749	9	ataacactt	4			No	Unknown
